# Supplementary material for: Hypoxic Incubation Conditions for Optimized Manufacture of Tenocyte-Based Active Pharmaceutical Ingredients of Homologous Standardized Transplant Products in Tendon Regenerative Medicine
Source: MDPI journal article supplement (doi:10.3390/cells10112872), 2021-10-25
Supplement: s1 [file s1]

## Process Parameters

Contents presented in this Supplementary Document are relative to the process parameters or quality attributes taken into account for the comparison of normoxic (i.e., 5% CO<sub>2</sub>; 21% O<sub>2</sub>) and hypoxic (i.e., 5% CO<sub>2</sub>; 2% O<sub>2</sub>) incubation conditions of hFPTs. Specific comparative evaluation results are presented for each parameter or attribute, for the incubation conditions investigated in this study. The objective was to assess if a switch from normoxic toward hypoxic incubation conditions may be considered for hFPT cultures, based on parametric and pondered evaluation results.

**Table PP1.** Definition of process parameters and quality attributes within the comparative hFPT manufacturing process. For each item, the predefined targets and the IPCs or PPCs to be appropriately monitored are listed, along with the corresponding acceptance criteria. Grading was performed for the comparative evaluation of incubation conditions using the abbreviated nomenclature presented hereafter. (−) = negative effect of hypoxic incubation, (+/−) = no impact of hypoxic incubation, (+) = positive effect of hypoxic incubation. CPPs were defined as parameters exerting a critical effect on the safety and quality of the final manufactured cell batch. KPPs were defined as parameters exerting a key effect on the quality of the final manufactured cell batch. CQAs were defined as attributes presenting critical implications in the safety and quality of the final manufactured cell batch. KQAs were defined as attributes presenting key implications in the quality of the final manufactured cell batch. CPP, critical process parameter; CQA, critical quality attribute; hFPT, human fetal progenitor tenocytes; IPC, in-process control; KQA, key quality attribute; KPP, key process parameter; PPC, post-process control.

| CPP/CQA<br>KPP/KQA                        | Targets                                                                       | IPCs/PPCs                                             | Acceptance criteria (cumulative)                                           | Evaluation of hypoxia<br>conditions vs. standard<br>normoxia conditions |
|-------------------------------------------|-------------------------------------------------------------------------------|-------------------------------------------------------|----------------------------------------------------------------------------|-------------------------------------------------------------------------|
| CPP/CQA<br>Cellular<br>morphology         | Specific hFPT cellular morphology and behavior maintenance in hypoxic culture | Visual monitoring of hFPT cultures during expansion   | Spindle-shaped cells                                                       | +/-                                                                     |
|                                           | Absence of observable multiple cell populations in hypoxic culture            | Photographic recording of hFPT cultures               | Distinctive fibroblastic phenotype<br>Absence of multiple cell populations |                                                                         |
| KPP/KQA<br>Cellular<br>proliferation rate | Maintenance or amelioration of hFPT proliferation rates in hypoxic culture    | Evolutionary monitoring of population doubling values | Equal or superior population doubling values in hypoxia vs. normoxia       | +                                                                       |
|                                           |                                                                               | Evolutionary monitoring of population doubling times  | Equal or inferior population doubling times in hypoxia vs. normoxia        |                                                                         |

|                                                        |                                                                                                                                                                                                                 |                                                                                                                                                                     |                                                                                                                                             |     |
|--------------------------------------------------------|-----------------------------------------------------------------------------------------------------------------------------------------------------------------------------------------------------------------|---------------------------------------------------------------------------------------------------------------------------------------------------------------------|---------------------------------------------------------------------------------------------------------------------------------------------|-----|
| <b>KPP/KQA</b><br>Cell size distribution               | Maintenance of hFPT size distribution in hypoxic culture or relative shift of cell size distribution toward smaller cells                                                                                       | Visual monitoring of hFPT cultures during expansion<br><br>Photographic recording of hFPT cultures<br><br>Determination of cell size distribution by flow cytometry | Maintained cell size distribution or shift of cell size distribution toward smaller cells                                                   | +   |
|                                                        |                                                                                                                                                                                                                 |                                                                                                                                                                     |                                                                                                                                             |     |
| <b>CPP/CQA</b><br>Cell surface markers                 | Maintenance of hFPT cell surface marker panel in hypoxic culture conditions                                                                                                                                     | Determination of cell surface marker panel by flow cytometry                                                                                                        | Maintenance of cell surface marker panel                                                                                                    | +/- |
| <b>CPP/CQA</b><br>Phenotype plasticity under induction | Maintenance of low hFPT phenotype plasticity in hypoxic culture conditions                                                                                                                                      | Determination of hFPT susceptibility toward chemical adipogenic and osteogenic induction                                                                            | Maintenance of low cell phenotype plasticity<br><br>Absence of increased susceptibility toward chemical adipogenic and osteogenic induction | +/- |
|                                                        |                                                                                                                                                                                                                 |                                                                                                                                                                     |                                                                                                                                             |     |
| <b>KPP/KQA</b><br>Protein contents                     | Maintenance of expression for characteristic hFPT protein components in hypoxic culture conditions<br><br>Increase in expression of proteins with potential therapeutic functions in hypoxic culture conditions | Determination of protein expression and protein contents during and following cell expansion                                                                        | Maintenance of expression for characteristic protein components (e.g., extracellular matrix components)                                     | +   |

|         |                            |                                                                                                                  |                                                                                        |                                                                                                          |     |
|---------|----------------------------|------------------------------------------------------------------------------------------------------------------|----------------------------------------------------------------------------------------|----------------------------------------------------------------------------------------------------------|-----|
| CPP/CQA | Absence of contaminants    | No increased rates of contaminating pathogens detected in retention samples from hypoxic culture conditions      | Monitoring of culture medium coloration (i.e., phenol red indicator) and turbidity     | Absence of detection for specified contaminants or values of detection < to specified thresholds         | +/- |
|         |                            |                                                                                                                  | Specific testing for bacteria, fungi, viruses, endotoxins, mycoplasma                  | Absence of detection for non-specified contaminants                                                      |     |
| CPP/CQA | Cellular viability         | Maintenance of adequate cellular viability upon hFPT enzymatic harvest and upon initiation from cryopreservation | Determination of relative cellular viability following cell harvest or cell initiation | Relative cellular viability $\geq$ 85% after harvest                                                     | +/- |
|         |                            |                                                                                                                  |                                                                                        | Relative cellular viability $\geq$ 80% after initiation                                                  |     |
| CPP/CQA | Cell adherence in culture  | Adherence of $\geq$ 70% of cells after the first 24 h of hypoxic incubation following hFPT cell seeding          | Visual monitoring of cultures after 24 h of incubation                                 | Cell adherence $\geq$ 70% after 24 h of incubation                                                       | +/- |
|         |                            |                                                                                                                  | Photographic recording of hFPT cultures                                                |                                                                                                          |     |
| KPP/KQA | Cell monolayer homogeneity | Homogenous growth of hFPT cell monolayer over available culture vessel surfaces in hypoxic culture conditions    | Visual monitoring of cell monolayer during expansion                                   | Absence of unpopulated culture surfaces $\geq$ 15% of the total available culture surface in each vessel | +/- |
|         |                            |                                                                                                                  | Photographic recording of cultures                                                     |                                                                                                          |     |
| CPP/CQA | Cell population purity     | Specific hFPT cellular morphology and behavior maintenance in hypoxic culture conditions                         | Visual monitoring of cultures during expansion                                         | Spindle-shaped cells                                                                                     | +/- |
|         |                            |                                                                                                                  | Photographic recording of cultures                                                     | Distinctive fibroblastic phenotype                                                                       |     |
|         |                            | Absence of multiple cell populations in culture                                                                  | Determination of cell surface marker panel by flow cytometry                           | Absence of multiple cell populations<br>Consistent cell surface marker panel                             |     |

|                                               |                                                                                                                 |                                                                                                                                |                                                                                          |     |
|-----------------------------------------------|-----------------------------------------------------------------------------------------------------------------|--------------------------------------------------------------------------------------------------------------------------------|------------------------------------------------------------------------------------------|-----|
| KPP/KQA<br>Cellular<br>metabolism             | No modification in hFPT cellular metabolism rate in hypoxic culture conditions                                  | Monitoring of the culture medium coloration (i.e., phenol red indicator) and turbidity                                         | No significant differences in culture medium color and turbidity                         | +/- |
| KPP/KQA<br>Culture<br>confluency<br>evolution | Confirmation of positive hFPT cell monolayer confluency evolution between successive medium exchange procedures | Visual monitoring of confluency at medium exchange procedures<br><br>Photographic recording of cultures                        | (Confluency value at medium exchange X) $\geq$ (Confluency value at medium exchange X-1) | +/- |
| KPP/KQA<br>Cell type lifespan                 | No modifications in hFPT cell type lifespan or increased cell type lifespan in hypoxic incubation conditions    | In vitro cell type lifespan determination<br><br>Evolutionary monitoring of cell population doubling values and doubling times | No modifications in cell type lifespan or increased cell type lifespan                   | +   |
| KPP/KQA<br>Total culture<br>period            | Conserved or shortened hFPT total culture period for specific in vitro expansions in hypoxic culture conditions | Evolutionary monitoring of cell culture periods, from seeding to harvest                                                       | Conserved or shortened total culture period for specific in vitro expansions             | +   |
