# Supplementary material for: Hypoxic Incubation Conditions for Optimized Manufacture of Tenocyte-Based Active Pharmaceutical Ingredients of Homologous Standardized Transplant Products in Tendon Regenerative Medicine
Source: MDPI journal article supplement (doi:10.3390/cells10112872), 2021-10-25
Supplement: s1 [file Spreadsheet S1.xlsx]

## Sheet: Sample list
	Sample ID	Cell type	Culture condition
	A	hFPTs	Normoxia
	B	hFPTs	Hypoxia
	C	Adult tenocytes	Normoxia

## Sheet: Proteomic data
Protein.Group.IDs	Accession	Protein.Group.Accessions	Description	Number.of.Peptides	Number.of.Unique.Peptides	Number.of.PSMs	Biological.Process	Cellular.Component	Molecular.Function	Gene.Symbol	WikiPathways	KEGG.Pathways	Reactome.Pathways	BvsA_Results_Mean_num	BvsA_Results_Mean_den	BvsA_Results_logFC	BvsA_Results_p_value	BvsA_Results_fdr	BvsA_Results_candidate	CvsA_Results_Mean_num	CvsA_Results_Mean_den	CvsA_Results_logFC	CvsA_Results_p_value	CvsA_Results_fdr	CvsA_Results_candidate	BvsA_z_A1	BvsA_z_B1	BvsA_z_A2	BvsA_z_B2	BvsA_z_A3	BvsA_z_B3	BvsA_z_C1	BvsA_z_C2	BvsA_z_C3	BvsA_SigProt_clusters	CvsA_z_A1	CvsA_z_B1	CvsA_z_A2	CvsA_z_B2	CvsA_z_A3	CvsA_z_B3	CvsA_z_C1	CvsA_z_C2	CvsA_z_C3	CvsA_SigProt_clusters	Division	Category
856	P00325	P00325;V9HW50;P00325-2;D6RHZ6;P07327;P00326;A0A087WU81;A0A087WUC4	All-trans-retinol dehydrogenase [NAD(+)] ADH1B OS=Homo sapiens OX=9606 GN=ADH1B PE=1 SV=2	16	16	125	metabolic process	cytoplasm;cytosol;membrane	catalytic activity;metal ion binding	ADH1B	Fatty Acid Omega Oxidation	Retinol metabolism; Drug metabolism - cytochrome P450; Fatty acid degradation; Chemical carcinogenesis; Tyrosine metabolism; Glycolysis / Gluconeogenesis; Metabolism of xenobiotics by cytochrome P450; Metabolic pathways	Ethanol oxidation	22.3442	24.635	-2.2908	0	0	FDR <= 0.01	22.0427	24.635	-2.5922	0	0	FDR <= 0.01	1.3189	-0.5298	1.3464	-0.6001	1.3092	-0.4894	-0.8331	-0.7419	-0.7803	6	1.3189	-0.5298	1.3464	-0.6001	1.3092	-0.4894	-0.8331	-0.7419	-0.7803	5
6687	Q15149-3	Q15149-3	Isoform 3 of Plectin OS=Homo sapiens OX=9606 GN=PLEC	343	3	5275	cell organization and biogenesis	cytoplasm;cytoskeleton;cytosol;membrane	protein binding;RNA binding;structural molecule activity	PLEC				18.2485	18.3076	-0.0592	0.3169	0.4173	FDR > 0.05	18.5478	18.3076	0.2401	0.0025	0.006	FDR <= 0.01
5141	H0YDS0	H0YDS0	Ubiquilin-1 (Fragment) OS=Homo sapiens OX=9606 GN=UBQLN1 PE=1 SV=1	3	1	31								18.0815	20.2561	-2.1746	0	0	FDR <= 0.01	19.0748	20.2561	-1.1813	0	0	FDR <= 0.01	1.4109	-1.0196	1.0524	-1.0467	1.0664	-1.2656	-0.0864	0.027	-0.1384	8	1.4109	-1.0196	1.0524	-1.0467	1.0664	-1.2656	-0.0864	0.027	-0.1384	5
815	Q15149-4	Q15149-4	integrin beta-1 OS=Homo sapiens OX=9606 GN=ITGB1 PE=1 SV=2	343	1	5288	cell organization and biogenesis	cytoplasm;cytoskeleton;cytosol;membrane	protein binding;RNA binding;structural molecule activity	PLEC				17.4814	17.2699	0.2115	0.0143	0.0332	FDR <= 0.05	16.9422	17.2699	-0.3278	0.0013	0.0034	FDR <= 0.01
7476	Q15149-5	Q15149-5	Isoform 5 of Plectin OS=Homo sapiens OX=9606 GN=PLEC	343	1	5284	cell organization and biogenesis	cytoplasm;cytoskeleton;cytosol;membrane	protein binding;RNA binding;structural molecule activity	PLEC									NA						NA
3217	P02452	P02452;I3L3H7	Collagen alpha-1(I) chain OS=Homo sapiens OX=9606 GN=COL1A1 PE=1 SV=5	59	55	822	cell communication;cell differentiation;cell organization and biogenesis;cellular component movement;coagulation;metabolic process;regulation of biological process;response to stimulus;transport	cytoplasm;endoplasmic reticulum;extracellular;Golgi;organelle lumen	metal ion binding;protein binding;structural molecule activity	COL1A1	Focal Adhesion; Osteoblast Signaling; Focal Adhesion-PI3K-Akt-mTOR-signaling pathway; miR-509-3p alteration of YAP1/ECM axis; Inflammatory Response Pathway; Senescence and Autophagy in Cancer	Focal adhesion; ECM-receptor interaction; Amoebiasis; PI3K-Akt signaling pathway; Protein digestion and absorption; Platelet activation; AGE-RAGE signaling pathway in diabetic complications	Collagen degradation; Integrin cell surface interactions; MET activates PTK2 signaling; Crosslinking of collagen fibrils; Anchoring fibril formation; Platelet Adhesion to exposed collagen; Scavenging by Class A Receptors; Syndecan interactions; GP1b-IX-V activation signalling; ECM proteoglycans; RUNX2 regulates osteoblast differentiation; Platelet Aggregation (Plug Formation); Immunoregulatory in…	25.0722	27.0465	-1.9743	0	0	FDR <= 0.01	25.8391	27.0465	-1.2075	0	0	FDR <= 0.01	1.2824	-1.1041	1.2064	-1.0751	1.1986	-0.9975	-0.1998	-0.2072	-0.1036	8	1.2824	-1.1041	1.2064	-1.0751	1.1986	-0.9975	-0.1998	-0.2072	-0.1036	5	Core matrisome	Collagens
3648	Q14204	Q14204;A0A2R8YFZ7;A0A2R8Y706;A0A2R8Y6H2;A0A2R8Y5T0;A0A2R8Y542;A0A2R8YGC7;H0YJ21;A0A2R8Y6I5	Cytoplasmic dynein 1 heavy chain 1 OS=Homo sapiens OX=9606 GN=DYNC1H1 PE=1 SV=5	209	209	2325	cell division;cell organization and biogenesis;cellular component movement;regulation of biological process;transport	cytoplasm;cytoskeleton;cytosol;extracellular;membrane;organelle lumen	catalytic activity;motor activity;nucleotide binding;protein binding;RNA binding	DYNC1H1		Phagosome; Salmonella infection; Vasopressin-regulated water reabsorption	COPI-independent Golgi-to-ER retrograde traffic; Regulation of PLK1 Activity at G2/M Transition; AURKA Activation by TPX2; Anchoring of the basal body to the plasma membrane; Recruitment of NuMA to mitotic centrosomes; Recruitment of mitotic centrosome proteins and complexes; Loss of Nlp from mitotic centrosomes; Amplification of signal from unattached kinetochores via a MAD2 inhibitory signal; N…	28.4081	28.3417	0.0664	0.0273	0.0569	FDR > 0.05	28.6961	28.3417	0.3544	0	0	FDR <= 0.01
6325	Q03001	Q03001;F8W9J4;Q03001-9	Dystonin OS=Homo sapiens OX=9606 GN=DST PE=1 SV=4	268	68	1525	cell organization and biogenesis;cellular component movement;regulation of biological process;response to stimulus;transport	cytoplasm;cytoskeleton;cytosol;endoplasmic reticulum;membrane;nucleus	metal ion binding;protein binding	DST			Type I hemidesmosome assembly	27.074	27.0389	0.0351	0.3374	0.4382	FDR > 0.05	26.9108	27.0389	-0.1281	0.0058	0.0123	FDR <= 0.05
2570	P21333	P21333-2;P21333;Q60FE5;A0A087WWY3;H0Y5C6;H0Y5F3;H7C2E7;A0A669KBC6	Filamin-A OS=Homo sapiens OX=9606 GN=FLNA PE=1 SV=4	139	121	2623	cell organization and biogenesis;cellular component movement;metabolic process;regulation of biological process;response to stimulus;transport	cytoplasm;cytoskeleton;cytosol;extracellular;membrane;nucleus	protein binding;RNA binding;signal transducer activity	FLNA	Androgen receptor signaling pathway; Prolactin Signaling Pathway; Focal Adhesion; Hypothesized Pathways in Pathogenesis of Cardiovascular Disease; MAPK Signaling Pathway; IL-4 Signaling Pathway	Proteoglycans in cancer; MAPK signaling pathway; Salmonella infection; Focal adhesion	Platelet degranulation ; RHO GTPases activate PAKs; Cell-extracellular matrix interactions; GP1b-IX-V activation signalling	29.5505	29.4645	0.086	0.068	0.1209	FDR > 0.05	29.8949	29.4645	0.4304	0	0	FDR <= 0.01
8034	P30838	P30838;C9JMC5;E9PNN6;A8MYB8;I3L3I9;C9JKT2;I3L1H6;I3L4E5;I3L3W9	Aldehyde dehydrogenase, dimeric NADP-preferring OS=Homo sapiens OX=9606 GN=ALDH3A1 PE=1 SV=3	18	17	160	metabolic process;regulation of biological process;response to stimulus	cytoplasm;cytosol;endoplasmic reticulum;membrane	catalytic activity;protein binding	ALDH3A1	Aryl Hydrocarbon Receptor Pathway; NRF2 pathway	Glycolysis / Gluconeogenesis; Histidine metabolism; Metabolic pathways; Drug metabolism - cytochrome P450; beta-Alanine metabolism; Tyrosine metabolism; Phenylalanine metabolism; Chemical carcinogenesis; Metabolism of xenobiotics by cytochrome P450	Phase I - Functionalization of compounds	23.6241	25.5432	-1.9191	0	0	FDR <= 0.01	22.6935	25.5432	-2.8497	0	0	FDR <= 0.01	1.2515	-0.2506	1.3006	-0.3218	1.2338	-0.2123	-1.0606	-0.9876	-0.953	5	1.2515	-0.2506	1.3006	-0.3218	1.2338	-0.2123	-1.0606	-0.9876	-0.953	7
6799	Q99715	Q99715;D6RGG3;Q99715-4;A0A087X0A8;Q99715-2;H0Y4P7	Collagen alpha-1(XII) chain OS=Homo sapiens OX=9606 GN=COL12A1 PE=1 SV=2	96	77	835	cell differentiation;cell organization and biogenesis;metabolic process	extracellular;organelle lumen	protein binding;structural molecule activity	COL12A1		Protein digestion and absorption	Collagen degradation; Assembly of collagen fibrils and other multimeric structures; Collagen chain trimerization	24.9739	26.8281	-1.8542	0	0	FDR <= 0.01	26.3937	26.8281	-0.4344	0	0	FDR <= 0.01	0.8981	-1.3432	0.9333	-1.2958	0.8929	-1.2583	0.3991	0.3871	0.3868	9											Core matrisome	Collagens
5986	P35579	P35579;P35579-2;Q5BKV1;B1AH99	Myosin-9 OS=Homo sapiens OX=9606 GN=MYH9 PE=1 SV=4	140	113	2477	cell differentiation;cell organization and biogenesis;cellular component movement;metabolic process;regulation of biological process;response to stimulus;transport	cytoplasm;cytoskeleton;cytosol;extracellular;membrane;nucleus	catalytic activity;motor activity;nucleotide binding;protein binding;RNA binding;transporter activity	MYH9	Primary Focal Segmental Glomerulosclerosis FSGS; VEGFA-VEGFR2 Signaling Pathway	Salmonella infection; Regulation of actin cytoskeleton; Tight junction	RHO GTPases activate PAKs; EPHA-mediated growth cone collapse; RHO GTPases Activate ROCKs; Sema4D induced cell migration and growth-cone collapse; Regulation of actin dynamics for phagocytic cup formation; RHO GTPases activate CIT; RHO GTPases activate PKNs	30.2766	30.1339	0.1427	0.0038	0.011	FDR <= 0.05	30.1411	30.1339	0.0072	0.8441	0.8738	FDR > 0.05
8202	F6QMI7	F6QMI7;E9PHM6;Q03001-8;E7ETB9;A0A494C1U5	Dystonin OS=Homo sapiens OX=9606 GN=DST PE=1 SV=2	202	1	1137	cell organization and biogenesis;cellular component movement;regulation of biological process;response to stimulus;transport	cytoplasm;cytoskeleton;cytosol;membrane;nucleus	metal ion binding;protein binding	DST				19.1681	19.1258	0.0423	0.2376	0.3324	FDR > 0.05	18.9784	19.1258	-0.1474	0.0021	0.0052	FDR <= 0.01
46	Q13449	F5H5G1;Q13449;H3BLU2	Limbic system-associated membrane protein OS=Homo sapiens OX=9606 GN=LSAMP PE=1 SV=2	2	2	16	metabolic process;response to stimulus	extracellular;membrane	protein binding	LSAMP			Post-translational modification: synthesis of GPI-anchored proteins	17.9684	19.6033	-1.6349	0	0	FDR <= 0.01	18.6162	19.6033	-0.9871	0	0	FDR <= 0.01	1.2354	-1.0299	1.2756	-1.1553	1.1591	-1.0099	-0.1148	-0.1103	-0.2499	8
4477	A0A087WTA8	A0A087WTA8;P08123	Collagen alpha-2(I) chain OS=Homo sapiens OX=9606 GN=COL1A2 PE=1 SV=1	55	55	726		endoplasmic reticulum	structural molecule activity		miRNA targets in ECM and membrane receptors; Focal Adhesion-PI3K-Akt-mTOR-signaling pathway			25.0602	26.5369	-1.4767	0	0	FDR <= 0.01	25.568	26.5369	-0.9689	0	0	FDR <= 0.01	1.2679	-1.0051	1.2698	-1.1002	1.2227	-0.9462	-0.2282	-0.2675	-0.2132	8											Core matrisome	Collagens
1172	H0Y5N9	H0Y5N9	Collagen alpha-1(XII) chain (Fragment) OS=Homo sapiens OX=9606 GN=COL12A1 PE=1 SV=1	20	1	214								14.4901	15.9088	-1.4188	0	0	FDR <= 0.01	15.1459	15.9088	-0.763	0	0.0001	FDR <= 0.01	1.0931	-0.9914	1.0528	-1.0303	1.3555	-1.3077	-0.1157	0.1838	-0.2401	8											Core matrisome	Collagens
2035	P02461	P02461;P02461-2	Collagen alpha-1(III) chain OS=Homo sapiens OX=9606 GN=COL3A1 PE=1 SV=4	26	18	155	cell organization and biogenesis;metabolic process;regulation of biological process;response to stimulus	extracellular;organelle lumen	metal ion binding;protein binding;structural molecule activity	COL3A1	miRNA targets in ECM and membrane receptors; Focal Adhesion; Focal Adhesion-PI3K-Akt-mTOR-signaling pathway; miR-509-3p alteration of YAP1/ECM axis; Inflammatory Response Pathway; Senescence and Autophagy in Cancer	Amoebiasis; Protein digestion and absorption; AGE-RAGE signaling pathway in diabetic complications; Platelet activation	Collagen degradation; Integrin cell surface interactions; MET activates PTK2 signaling; Scavenging by Class A Receptors; Syndecan interactions; ECM proteoglycans; Assembly of collagen fibrils and other multimeric structures; Immunoregulatory interactions between a Lymphoid and a non-Lymphoid cell; Collagen chain trimerization; Signaling by PDGF; NCAM1 interactions	22.4864	23.8135	-1.3271	0	0	FDR <= 0.01	22.9852	23.8135	-0.8283	0	0	FDR <= 0.01	1.2369	-1.063	1.2429	-1.0359	1.2325	-1.0458	-0.1974	-0.2164	-0.1538	8											Core matrisome	Collagens
3477	H3BPE1	H3BPE1;H3BQK9;H0Y314;H0Y4F5	Microtubule-actin cross-linking factor 1, isoforms 1/2/3/5 OS=Homo sapiens OX=9606 GN=MACF1 PE=1 SV=1	207	3	1104	regulation of biological process;response to stimulus	cytoplasm;cytoskeleton	catalytic activity;metal ion binding;motor activity;protein binding		Mesodermal Commitment Pathway			25.9409	25.9629	-0.022	0.3936	0.4969	FDR > 0.05	26.4505	25.9629	0.4876	0	0	FDR <= 0.01
6360	Q9UPN3	Q9UPN3;Q9UPN3-4;H0Y390	Microtubule-actin cross-linking factor 1, isoforms 1/2/3/5 OS=Homo sapiens OX=9606 GN=MACF1 PE=1 SV=4	202	1	1073	cell organization and biogenesis;regulation of biological process;response to stimulus;transport	cytoplasm;cytoskeleton;Golgi;membrane	catalytic activity;metal ion binding;motor activity;protein binding;RNA binding	MACF1	Mesodermal Commitment Pathway		Signaling by BRAF and RAF fusions	19.0592	19.0783	-0.019	0.6048	0.6919	FDR > 0.05	19.4017	19.0783	0.3234	0	0.0001	FDR <= 0.01
2090	Q8NF91	Q8NF91;E7ENN3;Q8NF91-7	Nesprin-1 OS=Homo sapiens OX=9606 GN=SYNE1 PE=1 SV=4	184	4	985	cell differentiation;cell organization and biogenesis	cytoplasm;cytoskeleton;Golgi;membrane;nucleus	protein binding;RNA binding	SYNE1			Meiotic synapsis	25.9432	25.9901	-0.0469	0.0463	0.0878	FDR > 0.05	25.9608	25.9901	-0.0293	0.1793	0.2389	FDR > 0.05
2301	Q8NF91-4	Q8NF91-4;A0A0C4DG40;H0Y325;Q8NF91-3;F8WAI0;Q8NF91-9	Isoform 4 of Nesprin-1 OS=Homo sapiens OX=9606 GN=SYNE1	183	3	981	cell differentiation;cell organization and biogenesis	cytoplasm;cytoskeleton;Golgi;membrane;nucleus	protein binding;RNA binding	SYNE1				19.9098	19.9571	-0.0472	0.3291	0.4297	FDR > 0.05	20.2082	19.9571	0.2511	0.0006	0.0017	FDR <= 0.01
7192	P78527	P78527;P78527-2;H0YG84;F5GX40	DNA-dependent protein kinase catalytic subunit OS=Homo sapiens OX=9606 GN=PRKDC PE=1 SV=3	166	165	1580	cell death;cell differentiation;cell organization and biogenesis;cell proliferation;defense response;metabolic process;regulation of biological process;response to stimulus	cytosol;membrane;nucleus	catalytic activity;DNA binding;nucleotide binding;protein binding;RNA binding	PRKDC	miRNA Regulation of DNA Damage Response; Cell Cycle; Retinoblastoma (RB) in Cancer; Fas Ligand (FasL) pathway and Stress induction of Heat Shock Proteins (HSP) regulation; Pathways Affected in Adenoid Cystic Carcinoma; ATM Signaling Network in Development and Disease; Non-homologous end joining; DNA Damage Response	Non-homologous end-joining; Cell cycle	Nonhomologous End-Joining (NHEJ); E3 ubiquitin ligases ubiquitinate target proteins; IRF3-mediated induction of type I IFN	27.7412	27.7479	-0.0067	0.7538	0.8147	FDR > 0.05	27.4891	27.7479	-0.2588	0	0	FDR <= 0.01
4038	Q01082-2	Q01082-2;Q01082-3	Isoform Short of Spectrin beta chain, non-erythrocytic 1 OS=Homo sapiens OX=9606 GN=SPTBN1	127	2	1270	cell organization and biogenesis;cellular component movement;metabolic process;regulation of biological process;response to stimulus;transport	cytoplasm;cytoskeleton;cytosol	protein binding;RNA binding;structural molecule activity	SPTBN1	TGF-beta Signaling Pathway			19.2296	19.2737	-0.0441	0.2938	0.3927	FDR > 0.05	19.4837	19.2737	0.21	0.0007	0.002	FDR <= 0.01
6259	O75369	O75369-2;O75369-9;O75369;O75369-6;O75369-3;O75369-7;E7EN95;O75369-4;O75369-5	Filamin-B OS=Homo sapiens OX=9606 GN=FLNB PE=1 SV=2	114	1	1307	cell differentiation;cell organization and biogenesis;development;regulation of biological process;response to stimulus	cytoplasm;cytoskeleton;cytosol;membrane;nucleus	protein binding;RNA binding	FLNB	VEGFA-VEGFR2 Signaling Pathway	MAPK signaling pathway; Proteoglycans in cancer; Salmonella infection; Focal adhesion	ISG15 antiviral mechanism	17.2714	17.3408	-0.0694	0.4201	0.5224	FDR > 0.05	17.4819	17.3408	0.1411	0.1222	0.1714	FDR > 0.05
1907	O75369-8	O75369-8	Isoform 8 of Filamin-B OS=Homo sapiens OX=9606 GN=FLNB	114	1	1307	cell organization and biogenesis;regulation of biological process;response to stimulus	cytoplasm;cytoskeleton;cytosol;membrane;nucleus	protein binding;RNA binding	FLNB	VEGFA-VEGFR2 Signaling Pathway			26.8233	26.8518	-0.0284	0.2206	0.3141	FDR > 0.05	26.8549	26.8518	0.0032	0.8853	0.9079	FDR > 0.05
8133	Q14315	Q14315;Q14315-2	Filamin-C OS=Homo sapiens OX=9606 GN=FLNC PE=1 SV=3	128	111	1490	cell organization and biogenesis	cytoplasm;cytoskeleton;cytosol;membrane	protein binding	FLNC		Proteoglycans in cancer; MAPK signaling pathway; Salmonella infection; Focal adhesion	Cell-extracellular matrix interactions	28.1251	28.099	0.026	0.4366	0.5392	FDR > 0.05	27.5279	28.099	-0.5711	0	0	FDR <= 0.01
4988	P28289	P28289	Tropomodulin-1 OS=Homo sapiens OX=9606 GN=TMOD1 PE=1 SV=1	2	1	15	cell organization and biogenesis;cellular component movement;regulation of biological process;response to stimulus	cytoplasm;cytoskeleton;cytosol;membrane	metal ion binding;protein binding	TMOD1	Striated Muscle Contraction		Striated Muscle Contraction	14.018	15.3346	-1.3166	0.0013	0.0045	FDR <= 0.01	17.4823	15.3346	2.1477	0	0.0002	FDR <= 0.01	-0.2011	-1.4949	-0.2481	-0.7025	-0.087	-0.8867	1.1941	1.1542	1.272	7	-0.2011	-1.4949	-0.2481	-0.7025	-0.087	-0.8867	1.1941	1.1542	1.272	1
6022	Q07954	Q07954;Q6PJ72;H0YJI8;Q07954-2;Q7Z7K9;H0YJ88	Prolow-density lipoprotein receptor-related protein 1 OS=Homo sapiens OX=9606 GN=LRP1 PE=1 SV=2	115	111	1252	cell proliferation;development;metabolic process;regulation of biological process;response to stimulus;transport	cytoplasm;cytosol;endosome;membrane;nucleus	metal ion binding;protein binding;receptor activity;RNA binding;transporter activity	LRP1	Alzheimers Disease; Regulation of Wnt/B-catenin Signaling by Small Molecule Compounds; Statin Pathway	Malaria; Alzheimer's disease	Signaling by GPCR; Scavenging of heme from plasma; Retinoid metabolism and transport	27.1601	27.0743	0.0857	0.004	0.0116	FDR <= 0.05	27.3879	27.0743	0.3135	0	0	FDR <= 0.01
4128	Q96CG8	Q96CG8;Q96CG8-3;Q96CG8-2;E7EVQ5;E5RK99	Collagen triple helix repeat-containing protein 1 OS=Homo sapiens OX=9606 GN=CTHRC1 PE=1 SV=1	7	7	72	cell organization and biogenesis;cellular component movement;regulation of biological process;response to stimulus	cytoplasm;extracellular	protein binding	CTHRC1				22.949	24.2407	-1.2917	0	0	FDR <= 0.01	21.8769	24.2407	-2.3638	0	0	FDR <= 0.01	1.1752	-0.0795	1.2556	-0.0552	1.1313	-0.0793	-1.1298	-1.18	-1.0383	5	1.1752	-0.0795	1.2556	-0.0552	1.1313	-0.0793	-1.1298	-1.18	-1.0383	7	Core matrisome	ECM Glycoproteins
6147	A0A087WVQ6	A0A087WVQ6;Q00610;Q00610-2;J3KS13;K7EJJ5;J3KSQ2;J3KRF5;J3QL20	Clathrin heavy chain OS=Homo sapiens OX=9606 GN=CLTC PE=1 SV=1	83	64	1373	cell differentiation;cell division;cell organization and biogenesis;cellular component movement;metabolic process;regulation of biological process;response to stimulus;transport	cytosol;endosome;membrane;mitochondrion;vacuole	protein binding;RNA binding;structural molecule activity	CLTC	Synaptic Vesicle Pathway; VEGFA-VEGFR2 Signaling Pathway; Complement and Coagulation Cascades			28.3856	28.3152	0.0705	0.0592	0.1078	FDR > 0.05	28.2588	28.3152	-0.0564	0.1165	0.1644	FDR > 0.05
8379	Q9NZM1-3	Q9NZM1-3;H0YD14	Isoform 3 of Myoferlin OS=Homo sapiens OX=9606 GN=MYOF	105	1	1324	cell organization and biogenesis;regulation of biological process;response to stimulus	membrane	protein binding	MYOF				17.1328	16.8518	0.281	0.0489	0.0917	FDR > 0.05	16.872	16.8518	0.0202	0.8714	0.8964	FDR > 0.05
3752	P02462	P02462;A0A3B3ISV3	Collagen alpha-1(IV) chain OS=Homo sapiens OX=9606 GN=COL4A1 PE=1 SV=4	5	3	25	cell differentiation;cell organization and biogenesis;metabolic process;regulation of biological process;response to stimulus	extracellular;organelle lumen	protein binding;structural molecule activity	COL4A1	Spinal Cord Injury; miRNA targets in ECM and membrane receptors; Focal Adhesion; Overview of nanoparticle effects; Focal Adhesion-PI3K-Akt-mTOR-signaling pathway	Focal adhesion; Amoebiasis; Small cell lung cancer; Protein digestion and absorption; ECM-receptor interaction; Pathways in cancer; PI3K-Akt signaling pathway; AGE-RAGE signaling pathway in diabetic complications		19.0247	20.293	-1.2683	0	0	FDR <= 0.01	19.6653	20.293	-0.6277	0	0	FDR <= 0.01	0.9887	-1.1405	1.2704	-1.2139	1.1816	-1.1096	0.0541	0.0268	-0.0575	8											Core matrisome	Collagens
3744	P20908-2	P20908-2;P20908;H7BY82	Isoform 2 of Collagen alpha-1(V) chain OS=Homo sapiens OX=9606 GN=COL5A1	19	19	112								22.4845	23.7126	-1.2281	0	0	FDR <= 0.01	22.3889	23.7126	-1.3237	0	0	FDR <= 0.01	1.3364	-0.6156	1.325	-0.6258	1.3281	-0.5291	-0.7808	-0.7088	-0.7294	6	1.3364	-0.6156	1.325	-0.6258	1.3281	-0.5291	-0.7808	-0.7088	-0.7294	5	Core matrisome	Collagens
1798	P46821	P46821;D6RA32;D6RA40;D6RGJ3	Microtubule-associated protein 1B OS=Homo sapiens OX=9606 GN=MAP1B PE=1 SV=2	94	92	1164	cell growth;cell organization and biogenesis;cellular component movement;regulation of biological process;transport	cytoplasm;cytoskeleton;cytosol;membrane	protein binding;structural molecule activity	MAP1B	Regulation of Microtubule Cytoskeleton			27.7256	27.8082	-0.0826	0.0161	0.0368	FDR <= 0.05	27.3943	27.8082	-0.414	0	0	FDR <= 0.01
8214	P46940	P46940;A0A0J9YXZ5;H0YLE8;A0A087WWP1;A0A087X225;H0YKA5	Ras GTPase-activating-like protein IQGAP1 OS=Homo sapiens OX=9606 GN=IQGAP1 PE=1 SV=1	85	79	1078	cell growth;regulation of biological process;response to stimulus;transport	cytoplasm;cytoskeleton;cytosol;membrane;nucleus	enzyme regulator activity;metal ion binding;protein binding	IQGAP1	VEGFA-VEGFR2 Signaling Pathway; EGF/EGFR Signaling Pathway; Regulation of Actin Cytoskeleton; G13 Signaling Pathway	Regulation of actin cytoskeleton; Adherens junction; Proteoglycans in cancer	Signaling by BRAF and RAF fusions; MAP2K and MAPK activation; RHO GTPases activate IQGAPs; Glucagon-like Peptide-1 (GLP1) regulates insulin secretion; Signaling by RAS mutants; Signaling by high-kinase activity BRAF mutants; Signaling by moderate kinase activity BRAF mutants; Nephrin family interactions; Paradoxical activation of RAF signaling by kinase inactive BRAF; Neutrophil degranulation; In…	27.8299	27.7361	0.0937	0.026	0.0547	FDR > 0.05	27.8853	27.7361	0.1492	0.0025	0.006	FDR <= 0.01
2768	Q99574	Q99574;C9JDY5;C9JQU8;H7C5T9	Neuroserpin OS=Homo sapiens OX=9606 GN=SERPINI1 PE=1 SV=1	9	9	52	regulation of biological process	extracellular;organelle lumen	enzyme regulator activity	SERPINI1				21.7308	22.9497	-1.2189	0	0	FDR <= 0.01	21.2765	22.9497	-1.6732	0	0	FDR <= 0.01	1.2646	-0.3572	1.3096	-0.3186	1.285	-0.3443	-0.9445	-0.941	-0.9536	5	1.2646	-0.3572	1.3096	-0.3186	1.285	-0.3443	-0.9445	-0.941	-0.9536	7	Matrisome-associated	ECM Regulators
3136	Q04727	Q04727;Q04727-4;Q04727-3;Q04727-2	Transducin-like enhancer protein 4 OS=Homo sapiens OX=9606 GN=TLE4 PE=1 SV=3	8	1	37	metabolic process;regulation of biological process;response to stimulus	nucleus	protein binding	TLE4			NOTCH1 Intracellular Domain Regulates Transcription; Repression of WNT target genes; Formation of the beta-catenin:TCF transactivating complex; Deactivation of the beta-catenin transactivating complex	10.3374	11.5553	-1.2179	0	0.0002	FDR <= 0.01	10.477	11.5553	-1.0784	0	0.0002	FDR <= 0.01	0.9111	-0.8241	1.1982	-0.7523	1.7185	-0.6863	-0.6691	-0.7766	-0.1193	6	0.9111	-0.8241	1.1982	-0.7523	1.7185	-0.6863	-0.6691	-0.7766	-0.1193	5
134	Q9Y4G6	Q9Y4G6;A0A1B0GVU7;H0YMT1;H0YN01	Talin-2 OS=Homo sapiens OX=9606 GN=TLN2 PE=1 SV=4	93	76	698	cell organization and biogenesis	cytoplasm;cytoskeleton;membrane	protein binding;structural molecule activity	TLN2		HTLV-I infection; Focal adhesion; Rap1 signaling pathway; Platelet activation		25.8241	25.7636	0.0605	0.0506	0.0945	FDR > 0.05	26.1343	25.7636	0.3707	0	0	FDR <= 0.01
7900	Q7Z6Z7	Q7Z6Z7;Q7Z6Z7-3;Q7Z6Z7-2;H0Y659;A0A087X1S3;A0A087X146	E3 ubiquitin-protein ligase HUWE1 OS=Homo sapiens OX=9606 GN=HUWE1 PE=1 SV=3	103	103	738	cell differentiation;cell organization and biogenesis;metabolic process;response to stimulus;transport	cytoplasm;cytosol;extracellular;membrane;nucleus;organelle lumen	catalytic activity;DNA binding;protein binding;RNA binding	HUWE1		Ubiquitin mediated proteolysis	Neutrophil degranulation; Antigen processing: Ubiquitination & Proteasome degradation	25.9573	25.8844	0.0729	0.0132	0.0312	FDR <= 0.05	25.95	25.8844	0.0656	0.0213	0.0378	FDR <= 0.05
5728	O60437	O60437;K7EKI8;K7EQ71	Periplakin OS=Homo sapiens OX=9606 GN=PPL PE=1 SV=4	115	114	804	cell death;cell organization and biogenesis;metabolic process;response to stimulus	cytoplasm;cytoskeleton;cytosol;membrane;mitochondrion;nucleus	protein binding;structural molecule activity	PPL			Butyrophilin (BTN) family interactions; Formation of the cornified envelope	26.8436	26.9314	-0.0878	0.0041	0.0117	FDR <= 0.05	27.2166	26.9314	0.2852	0	0	FDR <= 0.01
4441	P55957	P55957;P55957-2;P55957-4	BH3-interacting domain death agonist OS=Homo sapiens OX=9606 GN=BID PE=1 SV=1	3	3	16	cell death;cell organization and biogenesis;metabolic process;regulation of biological process;response to stimulus;transport	cytoplasm;cytosol;membrane;mitochondrion	protein binding	BID	miRNA Regulation of DNA Damage Response; TP53 Network; Alzheimers Disease; TNF alpha Signaling Pathway; Amyotrophic lateral sclerosis (ALS); Nanomaterial induced apoptosis; Apoptosis; Photodynamic therapy-induced HIF-1 survival signaling; Apoptosis Modulation by HSP70; Regulation of Apoptosis by Parathyroid Hormone-related Protein; DNA Damage Response	Amyotrophic lateral sclerosis (ALS); p53 signaling pathway; Tuberculosis; Natural killer cell mediated cytotoxicity; Viral myocarditis; Non-alcoholic fatty liver disease (NAFLD); Apoptosis; Pathways in cancer; Platinum drug resistance; Sphingolipid signaling pathway; Alzheimer's disease; Apoptosis - multiple species	Activation, translocation and oligomerization of BAX; Activation, myristolyation of BID and translocation to mitochondria; Activation of BAD and translocation to mitochondria ; TP53 Regulates Transcription of Genes Involved in Cytochrome C Release; Activation and oligomerization of BAK protein; BH3-only proteins associate with and inactivate anti-apoptotic BCL-2 members	15.9257	17.0868	-1.1611	0	0.0002	FDR <= 0.01	17.0138	17.0868	-0.073	0.5984	0.6596	FDR > 0.05	0.3581	-1.1214	1.1192	-1.5737	0.6294	-1.1443	0.6891	0.2391	0.8045	9
5656	P15559	P15559-2;P15559;H3BNV2;P15559-3;B4DLR8;H3BRK3	NAD(P)H dehydrogenase [quinone] 1 OS=Homo sapiens OX=9606 GN=NQO1 PE=1 SV=1	13	13	155	cell communication;metabolic process;regulation of biological process;response to stimulus	cytoplasm;cytosol	antioxidant activity;catalytic activity;protein binding;RNA binding	NQO1	Dopamine metabolism; Aryl Hydrocarbon Receptor; Apoptosis-related network due to altered Notch3 in ovarian cancer; Aryl Hydrocarbon Receptor Pathway; NRF2 pathway; Transcriptional activation by NRF2; Photodynamic therapy-induced NFE2L2 (NRF2) survival signaling; Simplified Interaction Map Between LOXL4 and Oxidative Stress Pathway; Benzene metabolism; Oxidative Stress; Estrogen metabolism	Ubiquinone and other terpenoid-quinone biosynthesis	Regulation of ornithine decarboxylase (ODC)	24.1923	25.3347	-1.1425	0	0	FDR <= 0.01	26.7149	25.3347	1.3802	0	0	FDR <= 0.01	-0.0744	-1.1943	-0.0806	-1.0608	-0.0621	-1.0928	1.2071	1.2063	1.1516	7	-0.0744	-1.1943	-0.0806	-1.0608	-0.0621	-1.0928	1.2071	1.2063	1.1516	1
7881	Q5T4S7	Q5T4S7;Q5T4S7-4;Q5T4S7-3;Q5T4S7-2;Q5T4S7-5;A0A0A0MSW0;X6R960;X6RE05;Q5TBN9;Q5T4S7-6	E3 ubiquitin-protein ligase UBR4 OS=Homo sapiens OX=9606 GN=UBR4 PE=1 SV=1	110	110	631	metabolic process;transport	cytoplasm;cytoskeleton;cytosol;membrane;nucleus	catalytic activity;metal ion binding;protein binding	UBR4		Viral carcinogenesis	Neutrophil degranulation; Antigen processing: Ubiquitination & Proteasome degradation	25.4014	25.3588	0.0425	0.1208	0.1922	FDR > 0.05	25.3691	25.3588	0.0103	0.6852	0.7384	FDR > 0.05
6365	Q16620-2	Q16620-7;Q16620-2	Isoform TrkB-T1 of BDNF/NT-3 growth factors receptor OS=Homo sapiens OX=9606 GN=NTRK2	2	2	16	cell differentiation;cell organization and biogenesis;cellular component movement;metabolic process;regulation of biological process;response to stimulus;transport	cytosol;endosome;membrane	catalytic activity;nucleotide binding;protein binding;receptor activity;signal transducer activity	NTRK2	Brain-Derived Neurotrophic Factor (BDNF) signaling pathway; BDNF-TrkB Signaling; ERK Pathway in Huntington's Disease; Sudden Infant Death Syndrome (SIDS) Susceptibility Pathways	MAPK signaling pathway; Alcoholism; Neurotrophin signaling pathway		18.2358	19.3701	-1.1343	0	0.0001	FDR <= 0.01	18.7873	19.3701	-0.5828	0.0008	0.0022	FDR <= 0.01	1.0777	-0.9678	1.096	-1.2326	1.1996	-1.1116	-0.1989	0.5471	-0.4096	8
4415	Q14789	Q14789-2;Q14789;Q14789-3;Q14789-4;E7EU81;H0Y867;H7C5I7	Golgin subfamily B member 1 OS=Homo sapiens OX=9606 GN=GOLGB1 PE=1 SV=2	114	114	567	cell organization and biogenesis;metabolic process;regulation of biological process;transport	Golgi;membrane	catalytic activity;DNA binding;motor activity;protein binding;RNA binding;transporter activity	GOLGB1			COPI-mediated anterograde transport; Golgi Associated Vesicle Biogenesis	25.302	25.3421	-0.0401	0.0969	0.1613	FDR > 0.05	25.1609	25.3421	-0.1812	0	0.0001	FDR <= 0.01
8108	Q5SGD2	Q5SGD2;Q5SGD2-3	Protein phosphatase 1L OS=Homo sapiens OX=9606 GN=PPM1L PE=1 SV=1	2	2	8	metabolic process;regulation of biological process;response to stimulus	membrane	catalytic activity;metal ion binding	PPM1L	Amino Acid metabolism		Sphingolipid de novo biosynthesis	17.7442	18.8399	-1.0958	0	0	FDR <= 0.01	18.8692	18.8399	0.0293	0.7404	0.7886	FDR > 0.05	0.741	-1.4672	0.7151	-1.1557	0.4329	-1.3107	0.5099	0.9999	0.5348	9
3729	E9PGC8	E9PGC8;P78559;P78559-2	Microtubule-associated protein 1A OS=Homo sapiens OX=9606 GN=MAP1A PE=1 SV=1	95	94	717	cell organization and biogenesis	cytoplasm	protein binding;structural molecule activity	MAP1A				26.772	26.898	-0.1261	0.0037	0.0108	FDR <= 0.05	26.9343	26.898	0.0362	0.2776	0.3468	FDR > 0.05
3986	P05997	P05997;A0A087WYX9	Collagen alpha-2(V) chain OS=Homo sapiens OX=9606 GN=COL5A2 PE=1 SV=3	11	11	42	cell organization and biogenesis;metabolic process;regulation of biological process;response to stimulus	extracellular;organelle lumen	metal ion binding;protein binding;structural molecule activity	COL5A2	miRNA targets in ECM and membrane receptors; Focal Adhesion; Focal Adhesion-PI3K-Akt-mTOR-signaling pathway	Protein digestion and absorption	ECM proteoglycans; Collagen degradation; Integrin cell surface interactions; Assembly of collagen fibrils and other multimeric structures; MET activates PTK2 signaling; Collagen chain trimerization; NCAM1 interactions; Signaling by PDGF; Syndecan interactions	21.2827	22.3643	-1.0816	0	0	FDR <= 0.01	20.9191	22.3643	-1.4452	0	0	FDR <= 0.01	1.307	-0.2402	1.2846	-0.4127	1.2793	-0.4471	-0.9123	-1.0227	-0.8359	5	1.307	-0.2402	1.2846	-0.4127	1.2793	-0.4471	-0.9123	-1.0227	-0.8359	7	Core matrisome	Collagens
1211	P08670	P08670;B0YJC4;B0YJC5;A0A1B0GTT5;A0A1B0GVG8	Vimentin OS=Homo sapiens OX=9606 GN=VIM PE=1 SV=4	66	55	4676	cell differentiation;cell organization and biogenesis;cellular component movement;metabolic process;regulation of biological process;response to stimulus	cytoplasm;cytoskeleton;cytosol;membrane	protein binding;RNA binding;structural molecule activity	VIM	Allograft Rejection; Spinal Cord Injury; Primary Focal Segmental Glomerulosclerosis FSGS; Apoptosis-related network due to altered Notch3 in ovarian cancer; Striated Muscle Contraction; TGF-B Signaling in Thyroid Cells for Epithelial-Mesenchymal Transition; T-Cell antigen Receptor (TCR) Signaling Pathway	MicroRNAs in cancer; Epstein-Barr virus infection	Interleukin-4 and 13 signaling; Caspase-mediated cleavage of cytoskeletal proteins; Striated Muscle Contraction	31.9388	31.9082	0.0306	0.3151	0.4156	FDR > 0.05	32.2413	31.9082	0.3331	0	0	FDR <= 0.01
3026	O95425	O95425;O95425-3;A0A6I8PIX7	Supervillin OS=Homo sapiens OX=9606 GN=SVIL PE=1 SV=2	86	1	660	cell organization and biogenesis;regulation of biological process	cytoplasm;cytoskeleton;cytosol;membrane;nucleus	protein binding	SVIL				26.3633	26.4711	-0.1078	0.0072	0.0187	FDR <= 0.05	25.3104	26.4711	-1.1606	0	0	FDR <= 0.01											0.7837	0.5866	0.7663	0.557	0.7311	0.556	-1.4266	-1.2366	-1.3176	6
7324	Q05707	Q05707-2;Q05707;Q05707-3;J3QT83;A0A0A0MQT7;Q4G0W3;H0YBB2	Collagen alpha-1(XIV) chain OS=Homo sapiens OX=9606 GN=COL14A1 PE=1 SV=3	58	57	571	cell organization and biogenesis	extracellular;organelle lumen	protein binding;RNA binding;structural molecule activity	COL14A1		Protein digestion and absorption	Collagen degradation; Assembly of collagen fibrils and other multimeric structures; Collagen chain trimerization	26.0345	27.1127	-1.0782	0	0	FDR <= 0.01	25.0739	27.1127	-2.0388	0	0	FDR <= 0.01	1.1696	-0.043	1.1987	-0.0593	1.1596	-0.0307	-1.1702	-1.1207	-1.104	5	1.1696	-0.043	1.1987	-0.0593	1.1596	-0.0307	-1.1702	-1.1207	-1.104	7	Core matrisome	Collagens
2534	P35580	P35580-3;P35580;P35580-4;P35580-2;P35580-5;E7ERA5	Myosin-10 OS=Homo sapiens OX=9606 GN=MYH10 PE=1 SV=3	88	63	836	cell organization and biogenesis;cellular component movement;metabolic process;regulation of biological process;transport	cytoplasm;cytosol;nucleus	catalytic activity;motor activity;nucleotide binding;protein binding;transporter activity	MYH10	Regulation of Actin Cytoskeleton	Tight junction; Regulation of actin cytoskeleton; Salmonella infection	RHO GTPases activate PAKs; EPHA-mediated growth cone collapse; RHO GTPases Activate ROCKs; Sema4D induced cell migration and growth-cone collapse; RHO GTPases activate CIT; RHO GTPases activate PKNs	26.2548	26.3348	-0.08	0.0046	0.0129	FDR <= 0.05	26.5304	26.3348	0.1956	0	0.0001	FDR <= 0.01
1137	O75165	O75165;A0A3B3IRM0;H0Y8Q2;H0YA63	DnaJ homolog subfamily C member 13 OS=Homo sapiens OX=9606 GN=DNAJC13 PE=1 SV=5	77	77	524	cell differentiation;cell organization and biogenesis;regulation of biological process;transport	cytosol;endosome;membrane	protein binding	DNAJC13			Neutrophil degranulation	25.6755	25.6223	0.0532	0.0325	0.0655	FDR > 0.05	25.6597	25.6223	0.0374	0.1071	0.1529	FDR > 0.05
1278	A0A494C1M4	A0A494C1M4;Q3SY69;Q3SY69-3;Q3SY69-2;H0YHN9;O75891;O75891-3;O75891-4;O75891-2	10-formyltetrahydrofolate dehydrogenase OS=Homo sapiens OX=9606 GN=ALDH1L2 PE=1 SV=1	46	45	340								25.0732	26.1334	-1.0602	0	0	FDR <= 0.01	25.4406	26.1334	-0.6928	0	0	FDR <= 0.01	1.2689	-1.0059	1.2763	-1.0572	1.213	-0.9975	-0.275	-0.2022	-0.2205	8
1277	O00483	O00483	Cytochrome c oxidase subunit NDUFA4 OS=Homo sapiens OX=9606 GN=NDUFA4 PE=1 SV=1	5	5	63	metabolic process;transport	membrane;mitochondrion	catalytic activity;protein binding;transporter activity	NDUFA4	Electron Transport Chain; Oxidative phosphorylation	Alzheimer's disease; Non-alcoholic fatty liver disease (NAFLD); Parkinson's disease; Oxidative phosphorylation; Huntington's disease; Metabolic pathways	TP53 Regulates Metabolic Genes; Respiratory electron transport	22.5631	23.5979	-1.0348	0	0	FDR <= 0.01	23.2021	23.5979	-0.3958	0	0.0002	FDR <= 0.01	1.172	-1.1975	1.1384	-1.1834	0.8323	-1.2961	0.3074	0.0735	0.1534	9
3765	O95302	O95302;O95302-3;O95302-2;C9J4P8;Q75LS8	Peptidyl-prolyl cis-trans isomerase FKBP9 OS=Homo sapiens OX=9606 GN=FKBP9 PE=1 SV=2	26	25	349	metabolic process	cytoplasm;endoplasmic reticulum	catalytic activity;metal ion binding	FKBP9			Association of TriC/CCT with target proteins during biosynthesis	25.5132	26.5437	-1.0305	0	0	FDR <= 0.01	26.018	26.5437	-0.5257	0	0	FDR <= 0.01	1.1143	-1.0735	1.1987	-1.1837	1.1716	-1.1806	0.0014	-0.0348	-0.0134	8
3252	P05230	P05230;C9JDC5;P05230-2;B5MCF4;C9JUP6	Fibroblast growth factor 1 OS=Homo sapiens OX=9606 GN=FGF1 PE=1 SV=1	4	4	19	cell communication;cell differentiation;cell proliferation;development;metabolic process;regulation of biological process;response to stimulus	cytoplasm;cytosol;extracellular;nucleus	catalytic activity;protein binding	FGF1	Differentiation Pathway; Lung fibrosis; ESC Pluripotency Pathways; Focal Adhesion-PI3K-Akt-mTOR-signaling pathway; Regulation of Actin Cytoskeleton	Melanoma; Hippo signaling pathway; Ras signaling pathway; Breast cancer; Rap1 signaling pathway; PI3K-Akt signaling pathway; Regulation of actin cytoskeleton; Pathways in cancer; MAPK signaling pathway	PI3K Cascade; Signaling by FGFR2 IIIa TM; SHC-mediated cascade:FGFR4; PI-3K cascade:FGFR3; FRS-mediated FGFR4 signaling; Signaling by activated point mutants of FGFR1; Activated point mutants of FGFR2; Negative regulation of FGFR2 signaling; Negative regulation of FGFR1 signaling; FGFR4 ligand binding and activation; PI-3K cascade:FGFR4; SHC-mediated cascade:FGFR2; Constitutive Signaling by Aberr…	19.696	20.7147	-1.0188	0	0	FDR <= 0.01	19.1639	20.7147	-1.5509	0	0	FDR <= 0.01	1.2118	-0.1625	1.3871	-0.3391	1.1541	-0.2093	-1.0027	-1.0712	-0.9683	5	1.2118	-0.1625	1.3871	-0.3391	1.1541	-0.2093	-1.0027	-1.0712	-0.9683	7	Matrisome-associated	Secreted Factors
5282	Q8N111	Q8N111	Cell cycle exit and neuronal differentiation protein 1 OS=Homo sapiens OX=9606 GN=CEND1 PE=1 SV=1	3	3	16	cell differentiation;cellular component movement;regulation of biological process;response to stimulus	membrane;mitochondrion		CEND1				19.3618	20.3723	-1.0105	0	0.0002	FDR <= 0.01	18.6753	20.3723	-1.697	0	0	FDR <= 0.01	1.5471	-0.0825	0.9086	-0.0707	1.1405	-0.2771	-1.0648	-1.2097	-0.8914	5	1.5471	-0.0825	0.9086	-0.0707	1.1405	-0.2771	-1.0648	-1.2097	-0.8914	7
1003	P04066	P04066	Tissue alpha-L-fucosidase OS=Homo sapiens OX=9606 GN=FUCA1 PE=1 SV=4	9	9	46	metabolic process;transport	cytoplasm;extracellular;organelle lumen;vacuole	catalytic activity	FUCA1		Other glycan degradation; Lysosome	Neutrophil degranulation; Reactions specific to the complex N-glycan synthesis pathway	22.0927	23.098	-1.0054	0	0	FDR <= 0.01	22.0593	23.098	-1.0388	0	0	FDR <= 0.01	1.4177	-0.6121	1.2381	-0.6357	1.3356	-0.6501	-0.6249	-0.6971	-0.7715	6	1.4177	-0.6121	1.2381	-0.6357	1.3356	-0.6501	-0.6249	-0.6971	-0.7715	5
6767	Q6P2Q9	Q6P2Q9;I3L0J9;I3L3Z8;I3L1T8	Pre-mRNA-processing-splicing factor 8 OS=Homo sapiens OX=9606 GN=PRPF8 PE=1 SV=2	81	81	596	cell organization and biogenesis;metabolic process;response to stimulus	membrane;nucleus;spliceosomal complex	catalytic activity;protein binding;RNA binding	PRPF8	mRNA Processing	Spliceosome	mRNA Splicing - Major Pathway; mRNA Splicing - Minor Pathway	25.9608	25.8731	0.0877	0.0042	0.0119	FDR <= 0.05	25.7565	25.8731	-0.1166	0.0008	0.0022	FDR <= 0.01
7046	Q15075	Q15075	Early endosome antigen 1 OS=Homo sapiens OX=9606 GN=EEA1 PE=1 SV=2	82	82	734	cell organization and biogenesis;metabolic process;transport	cytoplasm;cytosol;endosome;membrane	catalytic activity;metal ion binding;motor activity;protein binding;transporter activity	EEA1	VEGFA-VEGFR2 Signaling Pathway	Endocytosis; Tuberculosis; Phagosome	Toll Like Receptor 9 (TLR9) Cascade	26.8765	26.9266	-0.0502	0.0917	0.1541	FDR > 0.05	27.587	26.9266	0.6603	0	0	FDR <= 0.01
4648	Q96AY3	Q96AY3;H0Y827;Q96AY3-2;K7ESG6;K7ELI6;C9JPC3;K7EM43	Peptidyl-prolyl cis-trans isomerase FKBP10 OS=Homo sapiens OX=9606 GN=FKBP10 PE=1 SV=1	29	28	552	cell organization and biogenesis;metabolic process	cytoplasm;endoplasmic reticulum;organelle lumen	catalytic activity;metal ion binding	FKBP10				26.8575	27.8408	-0.9833	0	0	FDR <= 0.01	26.5935	27.8408	-1.2473	0	0	FDR <= 0.01											1.336	-0.443	1.3405	-0.3863	1.2395	-0.4334	-0.8943	-0.911	-0.8479	7
1723	P05186	P05186-3;P05186;P05186-2	Alkaline phosphatase, tissue-nonspecific isozyme OS=Homo sapiens OX=9606 GN=ALPL PE=1 SV=4	3	3	14	cell differentiation;metabolic process;response to stimulus	extracellular;membrane	catalytic activity;metal ion binding;protein binding	ALPL	AGE/RAGE pathway; Brain-Derived Neurotrophic Factor (BDNF) signaling pathway; NOTCH1 regulation of human endothelial cell calcification; Role of Osx and miRNAs in tooth development; Endochondral Ossification	Folate biosynthesis; Metabolic pathways; Thiamine metabolism	Post-translational modification: synthesis of GPI-anchored proteins	15.2374	16.2186	-0.9812	0	0.0001	FDR <= 0.01	15.4425	16.2186	-0.7762	0	0.0001	FDR <= 0.01
864	O75487	O75487-2;O75487	Glypican-4 OS=Homo sapiens OX=9606 GN=GPC4 PE=1 SV=4	3	2	9	cell proliferation;metabolic process;regulation of biological process;response to stimulus	extracellular;membrane;nucleus;organelle lumen	protein binding	GPC4		Wnt signaling pathway	Signaling by GPCR; HS-GAG biosynthesis; A tetrasaccharide linker sequence is required for GAG synthesis; Defective B4GALT7 causes EDS, progeroid type; Retinoid metabolism and transport; Defective B3GALT6 causes EDSP2 and SEMDJL1; HS-GAG degradation; Defective EXT2 causes exostoses 2; Defective B3GAT3 causes JDSSDHD; Defective EXT1 causes exostoses 1, TRPS2 and CHDS	15.1133	16.0912	-0.9779	0.0002	0.0011	FDR <= 0.01	14.9227	16.0912	-1.1685	0.0001	0.0003	FDR <= 0.01											1.6558	-0.4669	0.8601	-0.9	1.2203	-0.0036	-0.596	-1.0852	-0.6845	7	Matrisome-associated	ECM-affiliated Proteins
4588	P12814-3	P12814-3;P12814;P12814-2;P12814-4;H9KV75;H7C5W8;G3V2N5;H0YJW3;G3V2W4;H0YJ11;G3V2X9;G3V5M4;G3V2E8;G3V380	Isoform 3 of Alpha-actinin-1 OS=Homo sapiens OX=9606 GN=ACTN1	55	29	1135	cell differentiation;cell organization and biogenesis;regulation of biological process;transport	cytoplasm;cytosol;extracellular;membrane;organelle lumen	metal ion binding;protein binding;RNA binding	ACTN1	Arrhythmogenic Right Ventricular Cardiomyopathy; Focal Adhesion; Regulation of Actin Cytoskeleton			26.1574	26.1641	-0.0067	0.8423	0.884	FDR > 0.05	26.7299	26.1641	0.5658	0	0	FDR <= 0.01
4605	P45877	P45877	Peptidyl-prolyl cis-trans isomerase C OS=Homo sapiens OX=9606 GN=PPIC PE=1 SV=1	4	3	37	metabolic process	cytoplasm	catalytic activity;protein binding	PPIC				22.5696	23.5428	-0.9732	0.0001	0.0005	FDR <= 0.01	22.5215	23.5428	-1.0213	0.0001	0.0002	FDR <= 0.01											1.038	-0.2717	1.2894	-0.7434	1.482	-0.7519	-0.2735	-0.5432	-1.2257	5
7775	P12270	P12270;P12270-2;Q5SWX9	Nucleoprotein TPR OS=Homo sapiens OX=9606 GN=TPR PE=1 SV=3	88	87	491	cell division;cell organization and biogenesis;metabolic process;regulation of biological process;response to stimulus;transport	chromosome;cytoplasm;cytoskeleton;membrane;nucleus	catalytic activity;motor activity;protein binding;RNA binding;structural molecule activity;transporter activity	TPR		Pathways in cancer; Thyroid cancer; RNA transport	Rev-mediated nuclear export of HIV RNA; ISG15 antiviral mechanism; NEP/NS2 Interacts with the Cellular Export Machinery; tRNA processing in the nucleus; Transcriptional regulation by small RNAs; Defective TPR may confer susceptibility towards thyroid papillary carcinoma (TPC); Nuclear Pore Complex (NPC) Disassembly; Regulation of Glucokinase by Glucokinase Regulatory Protein; Vpr-mediated nuclear…	25.8674	25.9486	-0.0812	0.0089	0.0225	FDR <= 0.05	25.6417	25.9486	-0.3069	0	0	FDR <= 0.01
1387	P0DN79	P35520-2;P0DN79;H7C2H4;C9JMA6	Cystathionine beta-synthase-like protein OS=Homo sapiens OX=9606 GN=CBSL PE=1 SV=1	6	6	18	cell communication;metabolic process;response to stimulus	cytoplasm;cytosol;nucleus	catalytic activity;metal ion binding;protein binding	CBS; LOC102724560; CBSL	Selenium Micronutrient Network; Vitamin B12 Metabolism; Folate-Alcohol and Cancer Pathway; Folate Metabolism; Trans-sulfuration pathway; Trans-sulfuration and one carbon metabolism; Amino Acid metabolism; One carbon metabolism and related pathways	Cysteine and methionine metabolism; Metabolic pathways; Glycine, serine and threonine metabolism; Biosynthesis of amino acids	Metabolism of ingested SeMet, Sec, MeSec into H2Se; Cysteine formation from homocysteine	18.2609	19.2041	-0.9432	0	0	FDR <= 0.01	19.1567	19.2041	-0.0474	0.3403	0.411	FDR > 0.05
5673	P02545-3	P02545-3;A0A0C4DGC5	Isoform ADelta10 of Prelamin-A/C OS=Homo sapiens OX=9606 GN=LMNA	59	1	1762	cell organization and biogenesis;regulation of biological process;response to stimulus;transport	cytosol;membrane;nucleus	protein binding;structural molecule activity	LMNA	Arrhythmogenic Right Ventricular Cardiomyopathy; Adipogenesis; Fas Ligand (FasL) pathway and Stress induction of Heat Shock Proteins (HSP) regulation			14.3188	14.6239	-0.3051	0.2268	0.3205	FDR > 0.05	14.8186	14.6239	0.1947	0.4276	0.497	FDR > 0.05
4223	P02545-2	P02545-2;Q5TCI8;Q3BDU5	Isoform C of Prelamin-A/C OS=Homo sapiens OX=9606 GN=LMNA	58	1	1745	cell organization and biogenesis;regulation of biological process;response to stimulus;transport	cytosol;membrane;nucleus	protein binding;structural molecule activity	LMNA	Arrhythmogenic Right Ventricular Cardiomyopathy; Adipogenesis; Fas Ligand (FasL) pathway and Stress induction of Heat Shock Proteins (HSP) regulation		Meiotic synapsis; Depolymerisation of the Nuclear Lamina; Initiation of Nuclear Envelope Reformation; Clearance of Nuclear Envelope Membranes from Chromatin	21.7306	21.2468	0.4838	0.0494	0.0925	FDR > 0.05	21.2557	21.2468	0.0089	0.9672	0.9738	FDR > 0.05
647	Q14554	Q14554;Q14554-2;H7C4F9;C9JY10	Protein disulfide-isomerase A5 OS=Homo sapiens OX=9606 GN=PDIA5 PE=1 SV=1	25	25	311	cellular homeostasis;metabolic process;regulation of biological process;response to stimulus	endoplasmic reticulum;membrane;organelle lumen	catalytic activity;protein binding	PDIA5			XBP1(S) activates chaperone genes	25.3895	26.3309	-0.9414	0	0	FDR <= 0.01	24.1917	26.3309	-2.1392	0	0	FDR <= 0.01											1.1102	0.0987	1.1392	0.1172	1.0655	0.06	-1.1415	-1.2739	-1.1754	6
2698	P32322	P32322;P32322-3;E2QRB3;P32322-2;J3QKT4;J3KQ22;J3QL24;J3QL23;J3QLK9;J3QL32;J3QR88;J3QRZ0;J3KTA8;J3QKT3	Pyrroline-5-carboxylate reductase 1, mitochondrial OS=Homo sapiens OX=9606 GN=PYCR1 PE=1 SV=2	10	9	63	metabolic process;regulation of biological process;response to stimulus	mitochondrion;organelle lumen	catalytic activity;nucleotide binding;protein binding	PYCR1	Amino Acid metabolism; Urea cycle and metabolism of amino groups	Biosynthesis of amino acids; Arginine and proline metabolism; Metabolic pathways	Amino acid synthesis and interconversion (transamination)	21.8393	22.7775	-0.9383	0	0	FDR <= 0.01	21.6659	22.7775	-1.1117	0	0	FDR <= 0.01											1.3091	-0.5378	1.2583	-0.5003	1.3781	-0.434	-0.9801	-0.7643	-0.7289	5
618	P11216	P11216;H0Y4Z6	Glycogen phosphorylase, brain form OS=Homo sapiens OX=9606 GN=PYGB PE=1 SV=5	55	42	1132	metabolic process;transport	cytoplasm;extracellular;membrane;organelle lumen	catalytic activity;protein binding	PYGB	Glycogen Metabolism	Metabolic pathways; Glucagon signaling pathway; Insulin resistance; Starch and sucrose metabolism; Insulin signaling pathway	Neutrophil degranulation; Glycogen breakdown (glycogenolysis)	27.9739	27.9547	0.0193	0.6166	0.7014	FDR > 0.05	27.253	27.9547	-0.7017	0	0	FDR <= 0.01
7700	Q13439-5	Q13439-5;Q13439;Q13439-3;Q13439-4;H0Y6I0;C9JHJ5;E7EVX2;A0A087WTW2	Isoform 5 of Golgin subfamily A member 4 OS=Homo sapiens OX=9606 GN=GOLGA4	86	85	394	cell organization and biogenesis;regulation of biological process;transport	cytoplasm;cytosol;Golgi;membrane	protein binding	GOLGA4				24.6087	24.5217	0.087	0.0099	0.0245	FDR <= 0.05	24.2861	24.5217	-0.2356	0	0.0001	FDR <= 0.01
4634	P60709	P63261;P60709;A0A2R8Y793;I3L3I0;I3L4N8;I3L3R2;E7EVS6;J3KT65;A0A2R8YGF8;G5E9R0	Actin, cytoplasmic 1 OS=Homo sapiens OX=9606 GN=ACTB PE=1 SV=1	29	5	3713	cell organization and biogenesis;cellular component movement;metabolic process;regulation of biological process;response to stimulus	cytoplasm;cytoskeleton;cytosol;membrane;nucleus	DNA binding;nucleotide binding;protein binding;structural molecule activity	ACTB	Arrhythmogenic Right Ventricular Cardiomyopathy; Pathogenic Escherichia coli infection; Common Pathways Underlying Drug Addiction; Myometrial Relaxation and Contraction Pathways; Focal Adhesion; Fas Ligand (FasL) pathway and Stress induction of Heat Shock Proteins (HSP) regulation; Regulation of Actin Cytoskeleton	Thyroid hormone signaling pathway; Vibrio cholerae infection; Hippo signaling pathway; Leukocyte transendothelial migration; Tight junction; Salmonella infection; Shigellosis; Apoptosis; Influenza A; Oxytocin signaling pathway; Bacterial invasion of epithelial cells; Dilated cardiomyopathy; Regulation of actin cytoskeleton; Arrhythmogenic right ventricular cardiomyopathy (ARVC); Proteoglycans in …	Formation of annular gap junctions; Cell-extracellular matrix interactions; UCH proteinases; MAP2K and MAPK activation; Interaction between L1 and Ankyrins; Factors involved in megakaryocyte development and platelet production; Translocation of GLUT4 to the plasma membrane; EPH-ephrin mediated repulsion of cells; Prefoldin mediated transfer of substrate to CCT/TriC; EPHB-mediated forward signalin…	29.9916	29.8899	0.1017	0.0035	0.0104	FDR <= 0.05	30.1879	29.8899	0.298	0	0	FDR <= 0.01
6324	P13639	P13639	Elongation factor 2 OS=Homo sapiens OX=9606 GN=EEF2 PE=1 SV=4	51	50	1229	cell differentiation;cell proliferation;metabolic process;regulation of biological process;response to stimulus;transport	cytoplasm;cytosol;extracellular;membrane;nucleus;organelle lumen;ribosome	catalytic activity;nucleotide binding;protein binding;RNA binding	EEF2	Translation Factors; AMP-activated Protein Kinase (AMPK) Signaling; Brain-Derived Neurotrophic Factor (BDNF) signaling pathway	Oxytocin signaling pathway; AMPK signaling pathway	Peptide chain elongation; Protein methylation; Synthesis of diphthamide-EEF2; Neutrophil degranulation; Uptake and function of diphtheria toxin	28.1074	28.0839	0.0235	0.4342	0.5366	FDR > 0.05	28.143	28.0839	0.0591	0.0722	0.1088	FDR > 0.05
5597	P53396	P53396;P53396-2;P53396-3;K7ESG8;K7EIE7	ATP-citrate synthase OS=Homo sapiens OX=9606 GN=ACLY PE=1 SV=3	49	49	767	metabolic process;regulation of biological process;transport	cytoplasm;cytosol;extracellular;membrane;organelle lumen	catalytic activity;metal ion binding;nucleotide binding;protein binding	ACLY	Sterol Regulatory Element-Binding Proteins (SREBP) signalling; TCA Cycle and Deficiency of Pyruvate Dehydrogenase complex (PDHc); Fatty Acid Biosynthesis; Amino Acid metabolism	Citrate cycle (TCA cycle); Metabolic pathways	ChREBP activates metabolic gene expression; Fatty acyl-CoA biosynthesis; Neutrophil degranulation	27.4297	27.4315	-0.0018	0.9509	0.9646	FDR > 0.05	27.0943	27.4315	-0.3373	0	0	FDR <= 0.01
7994	P11532-6	P11532-5;P11532-8;P11532-7;P11532-6;P11532-9;P11532-10;P11532-18	Isoform 6 of Dystrophin OS=Homo sapiens OX=9606 GN=DMD	8	1	46	cell organization and biogenesis;cellular component movement;cellular homeostasis;metabolic process;regulation of biological process;response to stimulus	cell surface;cytoskeleton;cytosol;membrane	metal ion binding;protein binding;structural molecule activity	DMD	Arrhythmogenic Right Ventricular Cardiomyopathy; Ectoderm Differentiation; Striated Muscle Contraction			14.5292	15.464	-0.9348	0	0.0003	FDR <= 0.01	14.3637	15.464	-1.1002	0	0.0001	FDR <= 0.01											1.4054	-0.4546	0.9926	-0.1229	1.4309	-0.8701	-0.8344	-1.019	-0.5279	5
1376	E7EVA0	E7EVA0;P27816;P27816-6;P27816-2;P27816-4;B5MEG9	Microtubule-associated protein OS=Homo sapiens OX=9606 GN=MAP4 PE=1 SV=1	62	32	797	cell division;cell organization and biogenesis;cellular component movement;regulation of biological process	cytoplasm;cytoskeleton	protein binding;RNA binding;structural molecule activity	MAP4				27.6073	27.5909	0.0164	0.648	0.7288	FDR > 0.05	27.7526	27.5909	0.1616	0.0016	0.0041	FDR <= 0.01
1114	P49792	P49792	E3 SUMO-protein ligase RanBP2 OS=Homo sapiens OX=9606 GN=RANBP2 PE=1 SV=2	89	56	457	cell organization and biogenesis;metabolic process;regulation of biological process;response to stimulus;transport	cytoplasm;cytosol;membrane;mitochondrion;nucleus	catalytic activity;enzyme regulator activity;metal ion binding;protein binding;RNA binding	RANBP2		RNA transport	Rev-mediated nuclear export of HIV RNA; ISG15 antiviral mechanism; NEP/NS2 Interacts with the Cellular Export Machinery; Separation of Sister Chromatids; tRNA processing in the nucleus; Transcriptional regulation by small RNAs; Nuclear Pore Complex (NPC) Disassembly; Regulation of Glucokinase by Glucokinase Regulatory Protein; Vpr-mediated nuclear import of PICs; Regulation of HSF1-mediated heat …	25.4404	25.4665	-0.0262	0.3478	0.4495	FDR > 0.05	25.2717	25.4665	-0.1948	0.0001	0.0003	FDR <= 0.01
3086	P14618-2	P14618-2;H3BTN5;H3BR70	Isoform M1 of Pyruvate kinase PKM OS=Homo sapiens OX=9606 GN=PKM	36	5	1669	cell death;cell organization and biogenesis;metabolic process;response to stimulus;transport	cytoplasm;cytosol;extracellular;mitochondrion;nucleus;organelle lumen	catalytic activity;metal ion binding;nucleotide binding;protein binding;RNA binding	PKM	Photodynamic therapy-induced HIF-1 survival signaling; Amino Acid metabolism; Glycolysis and Gluconeogenesis		Glycolysis	23.6029	23.5019	0.101	0.2824	0.3808	FDR > 0.05	23.4624	23.5019	-0.0396	0.6637	0.7194	FDR > 0.05
7227	P21695	P21695;P21695-2	Glycerol-3-phosphate dehydrogenase [NAD(+)], cytoplasmic OS=Homo sapiens OX=9606 GN=GPD1 PE=1 SV=4	5	3	39	metabolic process;regulation of biological process;response to stimulus;transport	cytoplasm;cytosol;mitochondrion	catalytic activity;nucleotide binding;protein binding	GPD1	Triacylglyceride Synthesis	Glycerophospholipid metabolism	Synthesis of PA	18.7833	19.7181	-0.9348	0	0.0002	FDR <= 0.01	17.7249	19.7181	-1.9932	0	0	FDR <= 0.01											1.1341	0.0261	1.1472	0.0632	1.0724	0.0521	-1.1709	-0.8721	-1.4522	6
211	Q00341	Q00341;Q00341-2	Vigilin OS=Homo sapiens OX=9606 GN=HDLBP PE=1 SV=2	62	1	588	metabolic process;transport	cytoplasm;cytosol;membrane;nucleus	protein binding;RNA binding	HDLBP			HDL clearance	18.881	18.9878	-0.1068	0.4571	0.5599	FDR > 0.05	18.7021	18.9878	-0.2857	0.07	0.106	FDR > 0.05
4713	E5RIA2	E7EUF1;Q13822-3;Q13822-2;E5RIA2;Q13822	Ectonucleotide pyrophosphatase/phosphodiesterase family member 2 OS=Homo sapiens OX=9606 GN=ENPP2 PE=1 SV=1	2	2	8	metabolic process;regulation of biological process;response to stimulus		catalytic activity;metal ion binding					16.9173	17.836	-0.9187	0.0001	0.0005	FDR <= 0.01	18.867	17.836	1.031	0	0.0002	FDR <= 0.01											0.3157	-1.1693	-0.2353	-1.0646	-0.2113	-1.1092	1.2036	0.9874	1.2828	1
7402	P14618	P14618;P14618-3;B4DNK4	Pyruvate kinase PKM OS=Homo sapiens OX=9606 GN=PKM PE=1 SV=4	36	5	1659	cell death;cell organization and biogenesis;metabolic process;response to stimulus;transport	cytoplasm;cytosol;extracellular;mitochondrion;nucleus;organelle lumen	catalytic activity;metal ion binding;nucleotide binding;protein binding;RNA binding	PKM	Photodynamic therapy-induced HIF-1 survival signaling; Amino Acid metabolism; Glycolysis and Gluconeogenesis	Glycolysis / Gluconeogenesis; Pyruvate metabolism; Central carbon metabolism in cancer; Biosynthesis of amino acids; Type II diabetes mellitus; Carbon metabolism; Metabolic pathways; Glucagon signaling pathway; Purine metabolism; Viral carcinogenesis	Glycolysis; Neutrophil degranulation	28.922	28.7401	0.1819	0.01	0.0246	FDR <= 0.05	29.0782	28.7401	0.3381	0.0002	0.0009	FDR <= 0.01
871	Q9P2E9-3	Q9P2E9-3	Isoform 2 of Ribosome-binding protein 1 OS=Homo sapiens OX=9606 GN=RRBP1	59	1	801	cell differentiation;metabolic process;transport	endoplasmic reticulum;membrane;ribosome	receptor activity;RNA binding	RRBP1	Ectoderm Differentiation			18.2864	18.6002	-0.3138	0.0038	0.0111	FDR <= 0.05	18.57	18.6002	-0.0302	0.7081	0.7597	FDR > 0.05
6435	P63010	P63010;P63010-2;A0A087X253;P63010-3;A0A087WU93;A0A087WZQ6;A0A087WYD1;K7ERB2;K7EJ01;K7EN71;K7EJX1;K7EKZ5;A0A087WXS3	AP-2 complex subunit beta OS=Homo sapiens OX=9606 GN=AP2B1 PE=1 SV=1	40	24	597	cell organization and biogenesis;cellular component movement;metabolic process;regulation of biological process;response to stimulus;transport	cytosol;membrane	protein binding;transporter activity	AP2B1	Synaptic Vesicle Pathway; EGF/EGFR Signaling Pathway	Endocrine and other factor-regulated calcium reabsorption; Endocytosis; Synaptic vesicle cycle; Huntington's disease	Cargo recognition for clathrin-mediated endocytosis; Nef Mediated CD8 Down-regulation; Nef Mediated CD4 Down-regulation; Trafficking of GluR2-containing AMPA receptors; Recycling pathway of L1; LDL clearance; EPH-ephrin mediated repulsion of cells; Retrograde neurotrophin signalling; VLDLR internalisation and degradation; WNT5A-dependent internalization of FZD2, FZD5 and ROR2; MHC class II antige…	25.3739	25.4165	-0.0425	0.1748	0.2606	FDR > 0.05	25.4672	25.4165	0.0508	0.1135	0.1608	FDR > 0.05
1012	P04406-2	P04406-2	Isoform 2 of Glyceraldehyde-3-phosphate dehydrogenase OS=Homo sapiens OX=9606 GN=GAPDH	28	2	2839	cell death;cell organization and biogenesis;defense response;metabolic process;regulation of biological process;response to stimulus	cytoplasm;cytoskeleton;cytosol;membrane;nucleus	catalytic activity;enzyme regulator activity;nucleotide binding;protein binding	GAPDH	Cori Cycle; Alzheimers Disease; Glycolysis and Gluconeogenesis; Sudden Infant Death Syndrome (SIDS) Susceptibility Pathways			20.8791	20.7622	0.1169	0.3351	0.4359	FDR > 0.05	20.5264	20.7622	-0.2358	0.0724	0.1089	FDR > 0.05
2138	P09936	P09936;D6R956;D6RE83;D6R974	Ubiquitin carboxyl-terminal hydrolase isozyme L1 OS=Homo sapiens OX=9606 GN=UCHL1 PE=1 SV=2	10	10	132	cell communication;cell organization and biogenesis;cell proliferation;cellular component movement;metabolic process;regulation of biological process;response to stimulus;transport	cytoplasm;cytosol;endoplasmic reticulum;membrane	catalytic activity;protein binding	UCHL1	Proteasome Degradation; Parkinsons Disease Pathway; Hepatitis C and Hepatocellular Carcinoma	Parkinson's disease	UCH proteinases	23.1898	24.1044	-0.9146	0	0	FDR <= 0.01	24.0713	24.1044	-0.033	0.3682	0.4396	FDR > 0.05
1970	Q15746	Q15746-6;Q15746;Q15746-3;Q15746-5;Q15746-2;Q15746-4;Q15746-11;Q15746-7;Q15746-9;D6R9C2;F8WBL7;Q15746-8;Q15746-10	Myosin light chain kinase, smooth muscle OS=Homo sapiens OX=9606 GN=MYLK PE=1 SV=4	63	62	428	cell organization and biogenesis;metabolic process;regulation of biological process;response to stimulus	cytoplasm;cytoskeleton;cytosol	catalytic activity;metal ion binding;nucleotide binding;protein binding	MYLK	MicroRNAs in cardiomyocyte hypertrophy; Endothelin Pathways; Focal Adhesion; Association Between Physico-Chemical Features and Toxicity Associated Pathways; Regulation of Actin Cytoskeleton	Platelet activation; Focal adhesion; Gastric acid secretion; cGMP-PKG signaling pathway; Calcium signaling pathway; Regulation of actin cytoskeleton; Oxytocin signaling pathway; Vascular smooth muscle contraction	RHO GTPases activate PAKs; Smooth Muscle Contraction	25.0022	24.923	0.0792	0.0063	0.0167	FDR <= 0.05	26.1794	24.923	1.2564	0	0	FDR <= 0.01											-0.7521	-0.5804	-0.7293	-0.6297	-0.7101	-0.5914	1.3341	1.3429	1.3161	1
6190	O43772	O43772;C9JPE1	Mitochondrial carnitine/acylcarnitine carrier protein OS=Homo sapiens OX=9606 GN=SLC25A20 PE=1 SV=1	10	10	57	transport	cytosol;membrane;mitochondrion	transporter activity	SLC25A20	Fatty Acid Beta Oxidation; Mitochondrial LC-Fatty Acid Beta-Oxidation		Import of palmitoyl-CoA into the mitochondrial matrix	21.8138	22.7245	-0.9108	0	0	FDR <= 0.01	22.9388	22.7245	0.2142	0.0011	0.0031	FDR <= 0.01
7410	Q9NYL4	Q9NYL4;F8VU90;Q9NYL4-2;E9PAR0	Peptidyl-prolyl cis-trans isomerase FKBP11 OS=Homo sapiens OX=9606 GN=FKBP11 PE=1 SV=1	7	7	32	metabolic process	cytoplasm;membrane	catalytic activity	FKBP11				22.2279	23.1376	-0.9097	0	0	FDR <= 0.01	22.7728	23.1376	-0.3648	0	0	FDR <= 0.01
1819	Q9Y617	Q9Y617;Q9Y617-2	Phosphoserine aminotransferase OS=Homo sapiens OX=9606 GN=PSAT1 PE=1 SV=2	16	14	192	metabolic process	cytoplasm;cytosol	catalytic activity	PSAT1	Trans-sulfuration and one carbon metabolism	Biosynthesis of amino acids; Vitamin B6 metabolism; Metabolic pathways; Carbon metabolism; Glycine, serine and threonine metabolism	Serine biosynthesis	23.6228	24.5285	-0.9057	0	0	FDR <= 0.01	24.1789	24.5285	-0.3496	0	0.0001	FDR <= 0.01
2866	P54886	P54886;P54886-2	Delta-1-pyrroline-5-carboxylate synthase OS=Homo sapiens OX=9606 GN=ALDH18A1 PE=1 SV=2	32	32	318	metabolic process	cytoplasm;cytosol;membrane;mitochondrion	catalytic activity;nucleotide binding;protein binding;RNA binding	ALDH18A1	Amino Acid metabolism; Urea cycle and metabolism of amino groups	Arginine and proline metabolism; Biosynthesis of amino acids; Metabolic pathways	Amino acid synthesis and interconversion (transamination)	24.5339	25.4395	-0.9056	0	0	FDR <= 0.01	24.9765	25.4395	-0.463	0	0	FDR <= 0.01
85	O95980	O95980	Reversion-inducing cysteine-rich protein with Kazal motifs OS=Homo sapiens OX=9606 GN=RECK PE=1 SV=1	16	16	95	cell organization and biogenesis;metabolic process;regulation of biological process	extracellular;membrane	enzyme regulator activity;protein binding	RECK		MicroRNAs in cancer	Post-translational modification: synthesis of GPI-anchored proteins	21.7996	22.6897	-0.8901	0	0	FDR <= 0.01	22.242	22.6897	-0.4477	0	0.0001	FDR <= 0.01
1616	P36222	P36222;H0Y3U8	Chitinase-3-like protein 1 OS=Homo sapiens OX=9606 GN=CHI3L1 PE=1 SV=2	14	14	122	cell death;defense response;metabolic process;regulation of biological process;response to stimulus;transport	cytoplasm;endoplasmic reticulum;extracellular;organelle lumen	catalytic activity;structural molecule activity	CHI3L1			Neutrophil degranulation	22.1679	23.0528	-0.885	0	0	FDR <= 0.01	24.2974	23.0528	1.2446	0	0	FDR <= 0.01											-0.1688	-1.1881	-0.1536	-1.1408	-0.0645	-0.9147	1.2106	1.2174	1.2026	1
6662	O75462	O75462;M0QZL6	Cytokine receptor-like factor 1 OS=Homo sapiens OX=9606 GN=CRLF1 PE=1 SV=1	8	8	30	regulation of biological process;response to stimulus	cytosol;extracellular	protein binding	CRLF1			IL-6-type cytokine receptor ligand interactions; Interleukin-12 family signaling	20.0587	20.9422	-0.8835	0	0	FDR <= 0.01	20.1597	20.9422	-0.7824	0	0	FDR <= 0.01																					Matrisome-associated	Secreted Factors
2732	P16278	P16278;P16278-3;P16278-2;E7EQ29;C9J4G9;C9J539;C9JWX1;F8WF40;C9JF15	Beta-galactosidase OS=Homo sapiens OX=9606 GN=GLB1 PE=1 SV=2	14	14	150	metabolic process;response to stimulus;transport	cytoplasm;extracellular;Golgi;organelle lumen;vacuole	catalytic activity;protein binding	GLB1	Ectoderm Differentiation	Lysosome; Glycosaminoglycan degradation; Other glycan degradation; Glycosphingolipid biosynthesis - ganglio series; Metabolic pathways; Sphingolipid metabolism; Galactose metabolism	Sialic acid metabolism; Neutrophil degranulation; MPS IV - Morquio syndrome B; Glycosphingolipid metabolism; HS-GAG degradation; Keratan sulfate degradation	24.1356	25.0179	-0.8823	0	0	FDR <= 0.01	24.0942	25.0179	-0.9237	0	0	FDR <= 0.01
7263	Q14152	Q14152;Q14152-2	Eukaryotic translation initiation factor 3 subunit A OS=Homo sapiens OX=9606 GN=EIF3A PE=1 SV=1	79	79	614	cell organization and biogenesis;metabolic process;regulation of biological process	cytoplasm;cytosol;membrane;nucleus	protein binding;RNA binding;structural molecule activity	EIF3A	Translation Factors	RNA transport	Formation of the ternary complex, and subsequently, the 43S complex; L13a-mediated translational silencing of Ceruloplasmin expression; Translation initiation complex formation; GTP hydrolysis and joining of the 60S ribosomal subunit; Formation of a pool of free 40S subunits; Ribosomal scanning and start codon recognition	26.2339	26.205	0.0289	0.3297	0.4303	FDR > 0.05	26.2761	26.205	0.0711	0.034	0.0566	FDR > 0.05
3069	P53634	P53634	Dipeptidyl peptidase 1 OS=Homo sapiens OX=9606 GN=CTSC PE=1 SV=2	2	2	6	cell death;cell organization and biogenesis;metabolic process;regulation of biological process;response to stimulus;transport	endoplasmic reticulum;extracellular;Golgi;membrane;organelle lumen;vacuole	catalytic activity;enzyme regulator activity;protein binding	CTSC		Apoptosis; Lysosome	Neutrophil degranulation; MHC class II antigen presentation; Cargo concentration in the ER; COPII (Coat Protein 2) Mediated Vesicle Transport	17.4158	18.2889	-0.8732	0	0.0001	FDR <= 0.01	19.0341	18.2889	0.7451	0	0.0002	FDR <= 0.01																					Matrisome-associated	ECM Regulators
8118	Q8TED1	Q8TED1;E7ETY7;J3KNB5	Probable glutathione peroxidase 8 OS=Homo sapiens OX=9606 GN=GPX8 PE=1 SV=2	9	9	97	metabolic process;response to stimulus	membrane;organelle lumen	antioxidant activity;catalytic activity	GPX8		Thyroid hormone synthesis; Glutathione metabolism; Arachidonic acid metabolism	Detoxification of Reactive Oxygen Species	24.7024	25.5748	-0.8724	0	0	FDR <= 0.01	24.5958	25.5748	-0.9791	0	0	FDR <= 0.01
7132	P52272	P52272;P52272-2;A0A087X0X3;M0R2T0;M0R2I7;M0R019;M0QYQ7;M0R0N3;M0QY96;M0QYL3;M0R0Y6	Heterogeneous nuclear ribonucleoprotein M OS=Homo sapiens OX=9606 GN=HNRNPM PE=1 SV=3	46	20	896	metabolic process;regulation of biological process;response to stimulus	membrane;nucleus;spliceosomal complex	protein binding;RNA binding	HNRNPM	mRNA Processing	Spliceosome	mRNA Splicing - Major Pathway; FGFR2 alternative splicing	27.5449	27.5299	0.015	0.541	0.6376	FDR > 0.05	27.2503	27.5299	-0.2796	0	0	FDR <= 0.01
1969	A0A0C4DFS6	A0A0C4DFS6;Q9C004;Q9C004-2	Protein sprouty homolog 4 OS=Homo sapiens OX=9606 GN=SPRY4 PE=1 SV=1	4	4	20	development;regulation of biological process	cytoplasm;membrane	protein binding	SPRY4				18.7167	19.578	-0.8612	0	0	FDR <= 0.01	19.0575	19.578	-0.5205	0	0.0001	FDR <= 0.01
1334	P55072	P55072;C9IZA5;C9JUP7	Transitional endoplasmic reticulum ATPase OS=Homo sapiens OX=9606 GN=VCP PE=1 SV=4	45	45	554	cell communication;cell organization and biogenesis;metabolic process;regulation of biological process;response to stimulus;transport	cytoplasm;cytosol;endoplasmic reticulum;extracellular;membrane;nucleus;organelle lumen;proteasome	catalytic activity;enzyme regulator activity;nucleotide binding;protein binding;RNA binding	VCP		Legionellosis; Protein processing in endoplasmic reticulum	Protein methylation; Translesion Synthesis by POLH; N-glycan trimming in the ER and Calnexin/Calreticulin cycle; Josephin domain DUBs; Ovarian tumor domain proteases; ABC-family proteins mediated transport; HSF1 activation; Hh mutants that don't undergo autocatalytic processing are degraded by ERAD; E3 ubiquitin ligases ubiquitinate target proteins; Neutrophil degranulation; Defective CFTR causes…	26.2925	26.3237	-0.0312	0.5461	0.6413	FDR > 0.05	26.5594	26.3237	0.2357	0.0014	0.0037	FDR <= 0.01
1618	P51648	P51648-2;P51648;J3QRD1;A0A5F9ZHI5;A0A5F9ZHN9;A0A5F9ZI12;A0A5F9ZGX4;A0A5K1VW72;I3L1M4;A0A5F9ZHZ9;J3QS00;A0A5F9ZHP6;C9JGJ2;I3L0X1;J3QKK9;J3KTG1	Aldehyde dehydrogenase family 3 member A2 OS=Homo sapiens OX=9606 GN=ALDH3A2 PE=1 SV=1	14	12	135	metabolic process	endoplasmic reticulum;membrane;mitochondrion	catalytic activity	ALDH3A2	Tryptophan metabolism	Arginine and proline metabolism; Glycerolipid metabolism; Lysine degradation; Metabolic pathways; beta-Alanine metabolism; Fatty acid degradation; Glycolysis / Gluconeogenesis; Pyruvate metabolism; Valine, leucine and isoleucine degradation; Histidine metabolism; Tryptophan metabolism; Ascorbate and aldarate metabolism; Pentose and glucuronate interconversions	Sphingolipid de novo biosynthesis	24.875	25.7265	-0.8516	0	0	FDR <= 0.01	24.2744	25.7265	-1.4522	0	0	FDR <= 0.01											1.2144	-0.1016	1.217	-0.2205	1.2112	-0.0746	-1.0805	-1.1028	-1.0625	7
5959	P20774	P20774	Mimecan OS=Homo sapiens OX=9606 GN=OGN PE=1 SV=1	4	4	16	cell organization and biogenesis;metabolic process;regulation of biological process	extracellular;organelle lumen	protein binding	OGN			Keratan sulfate biosynthesis; Defective CHST6 causes MCDC1; Defective ST3GAL3 causes MCT12 and EIEE15; Defective B4GALT1 causes B4GALT1-CDG (CDG-2d); Keratan sulfate degradation	18.6921	19.5331	-0.841	0	0	FDR <= 0.01	17.9457	19.5331	-1.5874	0	0	FDR <= 0.01											1.178	-0.0474	1.1701	0.0215	1.1783	-0.1114	-1.0823	-1.2132	-1.0938	7	Core matrisome	Proteoglycans
8120	P35612	P35612;P35612-4;P35612-9;P35612-3;P35612-2;P35612-8	Beta-adducin OS=Homo sapiens OX=9606 GN=ADD2 PE=1 SV=3	5	4	40	cell organization and biogenesis;cellular component movement;regulation of biological process;transport	cytoplasm;cytoskeleton;cytosol;membrane	protein binding;structural molecule activity	ADD2			Miscellaneous transport and binding events	19.6611	20.4847	-0.8236	0	0	FDR <= 0.01	17.8589	20.4847	-2.6258	0	0	FDR <= 0.01											1.0375	0.2843	0.976	0.2489	0.9442	0.3058	-1.154	-1.2226	-1.4201	6
6486	E9PF55	E9PF55	Tensin-1 OS=Homo sapiens OX=9606 GN=TNS1 PE=1 SV=1	52	1	388	cell organization and biogenesis;cellular component movement	cell surface;cytoplasm;cytoskeleton	protein binding;RNA binding	TNS1	Integrin-mediated Cell Adhesion			16.1586	16.1658	-0.0072	0.9545	0.9671	FDR > 0.05	15.9062	16.1658	-0.2596	0.0676	0.1029	FDR > 0.05
1925	J3KS22	J3QS36;Q7Z4W1;J3KS22;J3QL34;J3QS45;J3KSZ5	L-xylulose reductase (Fragment) OS=Homo sapiens OX=9606 GN=DCXR PE=1 SV=8	3	3	28	metabolic process		catalytic activity					18.3719	19.1848	-0.8129	0	0	FDR <= 0.01	19.2354	19.1848	0.0506	0.2881	0.358	FDR > 0.05
6233	Q08378	Q08378;Q08378-2;Q08378-4;A0A087WV43	Golgin subfamily A member 3 OS=Homo sapiens OX=9606 GN=GOLGA3 PE=1 SV=2	61	61	381	metabolic process;regulation of biological process;transport	cytoplasm;cytosol;Golgi;membrane;nucleus	catalytic activity;motor activity;protein binding;structural molecule activity;transporter activity	GOLGA3				24.8498	24.9152	-0.0654	0.0275	0.0573	FDR > 0.05	24.8115	24.9152	-0.1037	0.0028	0.0065	FDR <= 0.01
5526	Q15643	Q15643;H0YJ97;Q15643-2;H0YJI2;G3V4R7	Thyroid receptor-interacting protein 11 OS=Homo sapiens OX=9606 GN=TRIP11 PE=1 SV=3	78	78	314	cell differentiation;cell organization and biogenesis;cellular component movement;metabolic process;regulation of biological process;transport	cytoplasm;cytoskeleton;Golgi;membrane;nucleus	protein binding	TRIP11			Intra-Golgi traffic; Intraflagellar transport	24.3947	24.4631	-0.0684	0.0192	0.0424	FDR <= 0.05	24.6818	24.4631	0.2187	0	0.0001	FDR <= 0.01
2726	G3V1L9	G3V1L9;Q07157;G5E9E7;A0A087X0K9;Q07157-2;H0YKB1;H0Y3R8;H0YLT6	Tight junction protein 1 (Zona occludens 1), isoform CRA_a OS=Homo sapiens OX=9606 GN=TJP1 PE=1 SV=1	57	53	342	cell communication;cell organization and biogenesis;cellular homeostasis;regulation of biological process;response to stimulus	cytoplasm;cytosol;membrane;nucleus	protein binding	TJP1				24.8781	24.8559	0.0221	0.3787	0.4808	FDR > 0.05	24.9869	24.8559	0.1309	0.0006	0.0017	FDR <= 0.01
4378	P11142	P11142;E9PKE3;P11142-2;E9PNE6;A8K7Q2;E9PN89;E9PLF4;E9PI65;E9PS65;E9PM13	Heat shock cognate 71 kDa protein OS=Homo sapiens OX=9606 GN=HSPA8 PE=1 SV=1	39	17	1458	cell communication;cell organization and biogenesis;metabolic process;regulation of biological process;response to stimulus;transport	cytoplasm;cytosol;endosome;extracellular;membrane;nucleus;organelle lumen;spliceosomal complex	catalytic activity;nucleotide binding;protein binding;RNA binding	HSPA8	Parkin-Ubiquitin Proteasomal System pathway; MAPK Signaling Pathway; Exercise-induced Circadian Regulation	MAPK signaling pathway; Longevity regulating pathway - multiple species; Antigen processing and presentation; Influenza A; Protein processing in endoplasmic reticulum; Epstein-Barr virus infection; Legionellosis; Measles; Estrogen signaling pathway; Toxoplasmosis; Spliceosome; Endocytosis	Protein methylation; Clathrin-mediated endocytosis; Regulation of HSF1-mediated heat shock response; Golgi Associated Vesicle Biogenesis; GABA synthesis, release, reuptake and degradation; Lysosome Vesicle Biogenesis; CHL1 interactions; AUF1 (hnRNP D0) binds and destabilizes mRNA; Attenuation phase; Neutrophil degranulation; mRNA Splicing - Major Pathway; Interleukin-4 and 13 signaling; HSP90 cha…	29.2662	29.2917	-0.0256	0.4738	0.5753	FDR > 0.05	29.4938	29.2917	0.2021	0.0003	0.0011	FDR <= 0.01
1298	A0A494BZV2	A0A494BZV2;H0Y2S9;H0Y7E2	Myosin phosphatase Rho-interacting protein OS=Homo sapiens OX=9606 GN=MPRIP PE=1 SV=1	65	19	318								24.4129	24.6401	-0.2273	0.0239	0.051	FDR > 0.05	24.6519	24.6401	0.0118	0.889	0.9111	FDR > 0.05
6194	P49588	P49588;P49588-2;H3BPK7	Alanine--tRNA ligase, cytoplasmic OS=Homo sapiens OX=9606 GN=AARS PE=1 SV=2	43	43	471	metabolic process;regulation of biological process	cytoplasm;cytosol;membrane;mitochondrion	catalytic activity;metal ion binding;nucleotide binding;RNA binding	AARS		Aminoacyl-tRNA biosynthesis	Cytosolic tRNA aminoacylation	27.359	27.3505	0.0085	0.7678	0.8251	FDR > 0.05	27.1468	27.3505	-0.2037	0.0001	0.0003	FDR <= 0.01
7999	Q15293	Q15293;Q15293-2;E9PP27	Reticulocalbin-1 OS=Homo sapiens OX=9606 GN=RCN1 PE=1 SV=1	12	12	135	metabolic process	endoplasmic reticulum;organelle lumen	metal ion binding;protein binding	RCN1			Post-translational protein phosphorylation; Regulation of Insulin-like Growth Factor (IGF) transport and uptake by Insulin-like Growth Factor Binding Proteins (IGFBPs)	24.6862	25.492	-0.8058	0	0	FDR <= 0.01	25.7235	25.492	0.2316	0.0019	0.0049	FDR <= 0.01
2966	Q9UKX5	Q9UKX5;Q9UKX5-2	Integrin alpha-11 OS=Homo sapiens OX=9606 GN=ITGA11 PE=1 SV=2	25	24	119	cell differentiation;cell organization and biogenesis;cellular component movement;regulation of biological process;response to stimulus	membrane	metal ion binding;protein binding;receptor activity;signal transducer activity	ITGA11	Integrin-mediated Cell Adhesion; Arrhythmogenic Right Ventricular Cardiomyopathy; miRNA targets in ECM and membrane receptors; Focal Adhesion; Focal Adhesion-PI3K-Akt-mTOR-signaling pathway	Dilated cardiomyopathy; ECM-receptor interaction; Hypertrophic cardiomyopathy (HCM); Focal adhesion; Arrhythmogenic right ventricular cardiomyopathy (ARVC); PI3K-Akt signaling pathway; Regulation of actin cytoskeleton	Integrin cell surface interactions	23.2451	24.0504	-0.8054	0	0	FDR <= 0.01	23.1112	24.0504	-0.9393	0	0	FDR <= 0.01
5904	Q99788	Q99788;Q99788-2	Chemokine-like receptor 1 OS=Homo sapiens OX=9606 GN=CMKLR1 PE=1 SV=2	2	2	8	regulation of biological process;response to stimulus	membrane	protein binding;receptor activity;signal transducer activity	CMKLR1	GPCRs, Class A Rhodopsin-like		Class A/1 (Rhodopsin-like receptors)	17.767	18.5719	-0.8049	0	0.0003	FDR <= 0.01	16.9461	18.5719	-1.6258	0	0	FDR <= 0.01											1.1568	0.0022	1.1468	0.0183	1.103	0.0019	-1.5004	-1.0601	-0.8686	6
7771	Q32P28	Q32P28;Q32P28-3;Q32P28-4;Q32P28-2;E2QRI1;H7C2W6	Prolyl 3-hydroxylase 1 OS=Homo sapiens OX=9606 GN=P3H1 PE=1 SV=2	28	26	258	metabolic process;regulation of biological process	endoplasmic reticulum;extracellular;membrane;organelle lumen	catalytic activity;metal ion binding;protein binding	LEPRE1; P3H1			Collagen biosynthesis and modifying enzymes	24.844	25.6391	-0.7951	0	0	FDR <= 0.01	24.7895	25.6391	-0.8497	0	0	FDR <= 0.01																					Matrisome-associated	ECM Regulators
12	Q9UIJ7	Q9UIJ7;Q9UIJ7-3;Q9UIJ7-2	GTP:AMP phosphotransferase AK3, mitochondrial OS=Homo sapiens OX=9606 GN=AK3 PE=1 SV=4	16	16	144	coagulation;metabolic process	mitochondrion;organelle lumen	catalytic activity;nucleotide binding;protein binding	AK3		Purine metabolism	Factors involved in megakaryocyte development and platelet production	25.0859	25.8746	-0.7888	0	0	FDR <= 0.01	25.9414	25.8746	0.0668	0.1185	0.1667	FDR > 0.05
1043	P09486	P09486;F5GY03;E5RK62	SPARC OS=Homo sapiens OX=9606 GN=SPARC PE=1 SV=1	10	10	90	cell organization and biogenesis;regulation of biological process;response to stimulus;transport	cell surface;cytoplasm;extracellular;membrane;mitochondrion;nucleus;organelle lumen	metal ion binding;protein binding	SPARC	miR-509-3p alteration of YAP1/ECM axis; Senescence and Autophagy in Cancer		Platelet degranulation ; ECM proteoglycans; Scavenging by Class H Receptors	22.1826	22.9642	-0.7817	0	0	FDR <= 0.01	22.9191	22.9642	-0.0452	0.299	0.3691	FDR > 0.05																					Core matrisome	ECM Glycoproteins
8322	Q10567	Q10567-2;Q10567	AP-1 complex subunit beta-1 OS=Homo sapiens OX=9606 GN=AP1B1 PE=1 SV=2	40	1	457	regulation of biological process;transport	cytosol;Golgi;membrane	protein binding;transporter activity	AP1B1		Lysosome	Nef mediated downregulation of MHC class I complex cell surface expression; MHC class II antigen presentation; Golgi Associated Vesicle Biogenesis; Lysosome Vesicle Biogenesis	26.5811	26.6251	-0.044	0.2369	0.3319	FDR > 0.05	26.7009	26.6251	0.0758	0.0588	0.0913	FDR > 0.05
6663	Q9UII2	Q9UII2;Q9UII2-3;A0A0B4J230;Q9UII2-2	ATPase inhibitor, mitochondrial OS=Homo sapiens OX=9606 GN=ATP5IF1 PE=1 SV=1	8	8	60	cell differentiation;cell organization and biogenesis;metabolic process;regulation of biological process	cell surface;mitochondrion	catalytic activity;enzyme regulator activity;protein binding	ATPIF1	Electron Transport Chain			22.2566	23.029	-0.7725	0	0.0003	FDR <= 0.01	22.4157	23.029	-0.6134	0.0002	0.0007	FDR <= 0.01
6165	P29144	P29144;A0A494C0U1;A0A494C1B8	Tripeptidyl-peptidase 2 OS=Homo sapiens OX=9606 GN=TPP2 PE=1 SV=4	51	2	420	metabolic process	cytoplasm;cytosol;nucleus	catalytic activity;protein binding	TPP2			Antigen processing: Ubiquitination & Proteasome degradation	18.2265	18.1177	0.1088	0.027	0.0565	FDR > 0.05	18.2767	18.1177	0.1589	0.0043	0.0094	FDR <= 0.01
6388	Q10567-3	Q10567-3;Q10567-4	Isoform C of AP-1 complex subunit beta-1 OS=Homo sapiens OX=9606 GN=AP1B1	40	1	457	regulation of biological process;transport	cytosol;Golgi;membrane	protein binding;transporter activity	AP1B1				17.666	17.5469	0.119	0.0745	0.1302	FDR > 0.05	17.5716	17.5469	0.0246	0.6824	0.7363	FDR > 0.05
4911	Q9UI10	Q9UI10;E7ERK9;F8W8L6;A0A087WW69	Translation initiation factor eIF-2B subunit delta OS=Homo sapiens OX=9606 GN=EIF2B4 PE=1 SV=2	11	1	75	metabolic process;regulation of biological process;response to stimulus	cytoplasm;cytosol	protein binding;RNA binding	EIF2B4	Translation Factors	RNA transport	Recycling of eIF2:GDP	18.2264	18.9927	-0.7663	0	0.0003	FDR <= 0.01	17.8009	18.9927	-1.1918	0	0	FDR <= 0.01											1.109	-0.0262	1.1631	-0.2946	1.3906	-0.3167	-0.6141	-1.1284	-1.2827	7
3495	Q9P2J5	Q9P2J5;Q9P2J5-2;A0A6I8PIT3;A0A6I8PIV1;A0A6I8PL42;A0A6I8PRS0;B4DER1;A0A6I8PS05;A0A6I8PLB8;A0A6I8PLB3;Q9P2J5-3;A0A6I8PIP7;A0A6I8PTV8;A0A6I8PRU9;A0A087WXY1;A0A6I8PRP1	Leucine--tRNA ligase, cytoplasmic OS=Homo sapiens OX=9606 GN=LARS PE=1 SV=2	49	49	436	cell communication;cell organization and biogenesis;metabolic process;regulation of biological process;response to stimulus;transport	cytoplasm;cytosol;endoplasmic reticulum;vacuole	catalytic activity;enzyme regulator activity;nucleotide binding;protein binding	LARS		Aminoacyl-tRNA biosynthesis	Cytosolic tRNA aminoacylation; SeMet incorporation into proteins	25.8207	25.8818	-0.0612	0.0241	0.0514	FDR > 0.05	25.8347	25.8818	-0.0471	0.0649	0.0994	FDR > 0.05
6232	Q8N3C0	Q8N3C0;Q8N3C0-4;E5RFZ0;Q8N3C0-3	Activating signal cointegrator 1 complex subunit 3 OS=Homo sapiens OX=9606 GN=ASCC3 PE=1 SV=3	67	67	363	cell proliferation;metabolic process;regulation of biological process;response to stimulus	cytosol;membrane;nucleus	catalytic activity;nucleotide binding;protein binding;RNA binding	ASCC3	Mesodermal Commitment Pathway		ALKBH3 mediated reversal of alkylation damage	24.2146	24.1856	0.029	0.2348	0.3296	FDR > 0.05	24.2282	24.1856	0.0426	0.0958	0.1387	FDR > 0.05
7282	P35606	P35606;P35606-2;D6RBT6;D6R997;H0Y938;D6RBG7;D6RBZ7;D6RCL6;H0YAC7	Coatomer subunit beta' OS=Homo sapiens OX=9606 GN=COPB2 PE=1 SV=2	43	43	433	transport	cytoplasm;cytosol;Golgi;membrane	protein binding;structural molecule activity	COPB2			COPI-dependent Golgi-to-ER retrograde traffic; COPI-mediated anterograde transport	25.9023	26.0119	-0.1096	0.0153	0.0353	FDR <= 0.05	25.9304	26.0119	-0.0815	0.0517	0.0818	FDR > 0.05
6012	P13804	P13804;P13804-2;H0YLU7;H0YL12;H0YK49;H0YNX6;H0YKF0;H0YL83	Electron transfer flavoprotein subunit alpha, mitochondrial OS=Homo sapiens OX=9606 GN=ETFA PE=1 SV=1	15	15	134	metabolic process;transport	mitochondrion;organelle lumen	catalytic activity;nucleotide binding;protein binding	ETFA			Respiratory electron transport	24.3906	25.1562	-0.7656	0	0	FDR <= 0.01	24.5988	25.1562	-0.5574	0	0	FDR <= 0.01
4174	P26038	P26038;V9GZ54	Moesin OS=Homo sapiens OX=9606 GN=MSN PE=1 SV=3	54	41	984	cell differentiation;cell organization and biogenesis;cell proliferation;cellular component movement;regulation of biological process;response to stimulus	cell surface;cytoplasm;cytoskeleton;cytosol;membrane;nucleus	protein binding;RNA binding;structural molecule activity	MSN	Glial Cell Differentiation; AGE/RAGE pathway; Regulation of Actin Cytoskeleton	Regulation of actin cytoskeleton; Measles; Proteoglycans in cancer; Leukocyte transendothelial migration	Gene and protein expression by JAK-STAT signaling after Interleukin-12 stimulation; Interleukin-12 family signaling; Recycling pathway of L1	28.7687	28.7433	0.0254	0.4238	0.5262	FDR > 0.05	28.9223	28.7433	0.1789	0.0003	0.0011	FDR <= 0.01
3693	P08238	P08238;Q58FF7;Q58FF8	Heat shock protein HSP 90-beta OS=Homo sapiens OX=9606 GN=HSP90AB1 PE=1 SV=4	45	27	1218	cell organization and biogenesis;metabolic process;regulation of biological process;response to stimulus;transport	cell surface;cytoplasm;cytosol;extracellular;membrane;mitochondrion;nucleus;organelle lumen	enzyme regulator activity;nucleotide binding;protein binding;RNA binding	HSP90AB1	NRF2 pathway; Focal Adhesion-PI3K-Akt-mTOR-signaling pathway	Estrogen signaling pathway; Pathways in cancer; PI3K-Akt signaling pathway; Prostate cancer; NOD-like receptor signaling pathway; Antigen processing and presentation; Protein processing in endoplasmic reticulum; Progesterone-mediated oocyte maturation	Sema3A PAK dependent Axon repulsion; HSF1 activation; Attenuation phase; Neutrophil degranulation; Aryl hydrocarbon receptor signalling; Uptake and function of diphtheria toxin; Regulation of actin dynamics for phagocytic cup formation; The NLRP3 inflammasome; HSP90 chaperone cycle for steroid hormone receptors (SHR); The role of GTSE1 in G2/M progression after G2 checkpoint	28.0065	28.0306	-0.0241	0.6818	0.7566	FDR > 0.05	27.9932	28.0306	-0.0374	0.5275	0.5932	FDR > 0.05
7467	P68371	P68371;M0R2D3;M0QX14;M0QZL7;M0QY37;M0R0X0;M0QY85	Tubulin beta-4B chain OS=Homo sapiens OX=9606 GN=TUBB4B PE=1 SV=1	24	1	1737	cell organization and biogenesis;cellular component movement;defense response;regulation of biological process;response to stimulus;transport	cytoplasm;cytoskeleton;cytosol;extracellular;nucleus;organelle lumen	catalytic activity;nucleotide binding;protein binding;RNA binding;structural molecule activity	TUBB4B	Pathogenic Escherichia coli infection; Parkin-Ubiquitin Proteasomal System pathway	Pathogenic Escherichia coli infection; Phagosome; Gap junction	COPI-independent Golgi-to-ER retrograde traffic; COPI-dependent Golgi-to-ER retrograde traffic; Carboxyterminal post-translational modifications of tubulin; Regulation of PLK1 Activity at G2/M Transition; Recruitment of NuMA to mitotic centrosomes; Hedgehog 'off' state; Loss of Nlp from mitotic centrosomes; Translocation of GLUT4 to the plasma membrane; Prefoldin mediated transfer of substrate to…	28.3908	28.2989	0.0918	0.0072	0.0189	FDR <= 0.05	28.224	28.2989	-0.0749	0.0194	0.0347	FDR <= 0.05
7376	P56159-2	P56159-2;P56159	Isoform 2 of GDNF family receptor alpha-1 OS=Homo sapiens OX=9606 GN=GFRA1	3	3	11	cellular component movement;metabolic process;regulation of biological process;response to stimulus	membrane	protein binding;receptor activity;signal transducer activity	GFRA1	Exercise-induced Circadian Regulation			18.595	19.3557	-0.7607	0	0	FDR <= 0.01	18.9689	19.3557	-0.3868	0.0004	0.0013	FDR <= 0.01
3899	P48740-2	P48740-4;P48740-2;P48740-3;P48740;F8W876	Isoform 2 of Mannan-binding lectin serine protease 1 OS=Homo sapiens OX=9606 GN=MASP1	6	5	23	defense response;metabolic process;regulation of biological process;response to stimulus;transport	cytosol;extracellular	catalytic activity;metal ion binding;protein binding	MASP1	Complement Activation; Complement and Coagulation Cascades			19.6882	20.4488	-0.7606	0	0	FDR <= 0.01	19.4451	20.4488	-1.0037	0	0	FDR <= 0.01											1.21	-0.5001	1.4104	-0.3603	1.2463	-0.2737	-1.0463	-0.9484	-0.7379	7	Matrisome-associated	ECM Regulators
4267	O95782	O95782;O95782-2	AP-2 complex subunit alpha-1 OS=Homo sapiens OX=9606 GN=AP2A1 PE=1 SV=3	43	29	478	cell organization and biogenesis;cellular component movement;metabolic process;regulation of biological process;response to stimulus;transport	cytosol;membrane	protein binding;transporter activity	AP2A1	Synaptic Vesicle Pathway; EGF/EGFR Signaling Pathway	Endocytosis; Synaptic vesicle cycle; Huntington's disease; Endocrine and other factor-regulated calcium reabsorption	Cargo recognition for clathrin-mediated endocytosis; Nef Mediated CD8 Down-regulation; Nef Mediated CD4 Down-regulation; Trafficking of GluR2-containing AMPA receptors; Recycling pathway of L1; LDL clearance; EPH-ephrin mediated repulsion of cells; Retrograde neurotrophin signalling; VLDLR internalisation and degradation; WNT5A-dependent internalization of FZD2, FZD5 and ROR2; MHC class II antige…	26.1822	26.2409	-0.0587	0.1598	0.2423	FDR > 0.05	26.348	26.2409	0.1071	0.0222	0.0391	FDR <= 0.05
7604	Q08211	Q08211;Q08211-2	ATP-dependent RNA helicase A OS=Homo sapiens OX=9606 GN=DHX9 PE=1 SV=4	44	44	494	cell death;cell differentiation;cell organization and biogenesis;defense response;metabolic process;regulation of biological process;response to stimulus;transport	cytoplasm;cytoskeleton;cytosol;membrane;nucleus;ribosome	catalytic activity;DNA binding;metal ion binding;nucleotide binding;protein binding;RNA binding	DHX9	mRNA Processing		TRAF6 mediated NF-kB activation; TAK1 activates NFkB by phosphorylation and activation of IKKs complex; RIP-mediated NFkB activation via ZBP1; Activated TLR4 signalling; Interleukin-1 family signaling; mRNA Splicing - Major Pathway; DEx/H-box helicases activate type I IFN and inflammatory cytokines production	26.0647	26.03	0.0347	0.2045	0.2956	FDR > 0.05	25.97	26.03	-0.06	0.0439	0.0709	FDR > 0.05
4712	Q8NE86	Q8NE86-3;Q8NE86;S4R468;Q8NE86-2	Calcium uniporter protein, mitochondrial OS=Homo sapiens OX=9606 GN=MCU PE=1 SV=1	14	14	92	cell organization and biogenesis;cellular homeostasis;defense response;metabolic process;regulation of biological process;response to stimulus;transport	membrane;mitochondrion	catalytic activity;protein binding;transporter activity	MCU		NOD-like receptor signaling pathway; Calcium signaling pathway	Processing of SMDT1	23.5437	24.2989	-0.7552	0	0	FDR <= 0.01	23.2967	24.2989	-1.0023	0	0	FDR <= 0.01											1.3736	-0.3311	1.2567	-0.3424	1.2482	-0.4479	-0.8412	-1.01	-0.906	7
4515	P53618	P53618;E9PP73;E9PP63;E9PKQ1	Coatomer subunit beta OS=Homo sapiens OX=9606 GN=COPB1 PE=1 SV=3	41	41	419	transport	cytoplasm;cytosol;Golgi;membrane	protein binding;structural molecule activity	COPB1			COPI-dependent Golgi-to-ER retrograde traffic; Neutrophil degranulation; COPI-mediated anterograde transport	26.0222	26.126	-0.1038	0.0088	0.0223	FDR <= 0.05	25.983	26.126	-0.143	0.0015	0.0038	FDR <= 0.01
4055	A0A096LNX8	Q96GP6-2;A0A096LNX8	Scavenger receptor class F member 2 OS=Homo sapiens OX=9606 GN=SCARF2 PE=1 SV=1	3	3	11	transport		protein binding;receptor activity	SCARF2				16.0042	16.7581	-0.7539	0	0.0002	FDR <= 0.01	16.0142	16.7581	-0.7439	0	0.0001	FDR <= 0.01
5983	O75718	O75718;C9JP16	Cartilage-associated protein OS=Homo sapiens OX=9606 GN=CRTAP PE=1 SV=1	17	17	153	metabolic process;regulation of biological process	endoplasmic reticulum;extracellular;organelle lumen	protein binding	CRTAP			Collagen biosynthesis and modifying enzymes	24.5184	25.2716	-0.7532	0	0	FDR <= 0.01	24.4258	25.2716	-0.8457	0	0	FDR <= 0.01
1947	Q13018	Q13018-2;Q13018	Secretory phospholipase A2 receptor OS=Homo sapiens OX=9606 GN=PLA2R1 PE=1 SV=2	8	8	25	metabolic process;regulation of biological process;response to stimulus;transport	cell surface;extracellular;membrane	protein binding;receptor activity;signal transducer activity	PLA2R1		Tuberculosis; Phagosome	Acyl chain remodelling of PI; Synthesis of PA; Acyl chain remodelling of PG; Acyl chain remodelling of PS; Acyl chain remodelling of PE; Acyl chain remodelling of PC	19.1294	19.8771	-0.7477	0	0	FDR <= 0.01	19.1814	19.8771	-0.6957	0	0	FDR <= 0.01
1083	Q5T5P2	Q5T5P2;Q5T5P2-3;Q5T5P2-10;Q5T5P2-7;Q5T5P2-6;Q5T5P2-8;Q5T5P2-2;Q5T5P2-9;Q5T5P2-4;Q5T5P1;Q5T5P0;A0A0U1RRK8	Sickle tail protein homolog OS=Homo sapiens OX=9606 GN=KIAA1217 PE=1 SV=2	50	49	326	development	cytoplasm	protein binding	KIAA1217				24.1543	24.089	0.0654	0.0338	0.0676	FDR > 0.05	24.686	24.089	0.597	0	0	FDR <= 0.01
3783	Q9Y520	Q9Y520-4;Q9Y520-5;Q9Y520;E7EPN9;Q9Y520-7;Q9Y520-6;Q9Y520-3;Q9Y520-2;H7C5N8;A0A2R8YET2;A0A2R8Y7F4;A0A0A0MS30;A0A2R8Y424	Protein PRRC2C OS=Homo sapiens OX=9606 GN=PRRC2C PE=1 SV=4	61	58	344	cell differentiation	membrane	protein binding;RNA binding	PRRC2C				24.4817	24.4842	-0.0025	0.9238	0.9449	FDR > 0.05	24.5805	24.4842	0.0964	0.0048	0.0104	FDR <= 0.05
5026	H3BNQ7	H3BNQ7;H3BRN4;P80404	4-aminobutyrate aminotransferase, mitochondrial OS=Homo sapiens OX=9606 GN=ABAT PE=1 SV=1	2	2	5	metabolic process	mitochondrion	catalytic activity		Valproic acid pathway			16.0186	16.7599	-0.7413	0.0004	0.0019	FDR <= 0.01	17.3267	16.7599	0.5668	0.0023	0.0056	FDR <= 0.01
6487	Q96PE7	Q96PE7;F5GZ54	Methylmalonyl-CoA epimerase, mitochondrial OS=Homo sapiens OX=9606 GN=MCEE PE=1 SV=1	5	5	51	metabolic process	mitochondrion;organelle lumen	catalytic activity;metal ion binding;protein binding	MCEE	Vitamin B12 Metabolism	Valine, leucine and isoleucine degradation; Metabolic pathways; Propanoate metabolism; Glyoxylate and dicarboxylate metabolism; Carbon metabolism	Propionyl-CoA catabolism	21.283	22.0237	-0.7406	0	0	FDR <= 0.01	21.1264	22.0237	-0.8973	0	0	FDR <= 0.01
6907	A0A1C7CYX9	A0A1C7CYX9;Q16555;Q16555-2;E5RFU4	Dihydropyrimidinase-related protein 2 OS=Homo sapiens OX=9606 GN=DPYSL2 PE=1 SV=1	34	29	796	cell organization and biogenesis;cellular component movement;metabolic process;regulation of biological process;response to stimulus;transport	cytoplasm;cytosol;membrane;mitochondrion	catalytic activity;protein binding	DPYSL2	Regulation of Microtubule Cytoskeleton; Brain-Derived Neurotrophic Factor (BDNF) signaling pathway			26.2732	26.1371	0.1361	0.0056	0.0152	FDR <= 0.05	26.7606	26.1371	0.6235	0	0	FDR <= 0.01
6111	E7EX90	Q14203-4;Q14203-3;E7EX90;Q14203-6;Q14203;Q14203-5;Q14203-2;Q6AWB1;E7EWF7;C9JKG6;C9JJD0;E9PCY0;C9JTE5;C9JJN7;C9J1B7	Dynactin subunit 1 OS=Homo sapiens OX=9606 GN=DCTN1 PE=1 SV=1	48	48	425	cell organization and biogenesis;cellular component movement;metabolic process;transport	cytoskeleton;cytosol	protein binding					25.616	25.4995	0.1165	0.005	0.014	FDR <= 0.05	25.7332	25.4995	0.2337	0.0001	0.0003	FDR <= 0.01
6238	P55809	P55809;E9PDW2;P55809-2	Succinyl-CoA:3-ketoacid coenzyme A transferase 1, mitochondrial OS=Homo sapiens OX=9606 GN=OXCT1 PE=1 SV=1	18	18	289	metabolic process;regulation of biological process;response to stimulus	mitochondrion;organelle lumen	catalytic activity;protein binding	OXCT1	Synthesis and Degradation of Ketone Bodies	Butanoate metabolism; Synthesis and degradation of ketone bodies; Valine, leucine and isoleucine degradation	Utilization of Ketone Bodies	25.7123	26.4514	-0.7391	0	0	FDR <= 0.01	26.1684	26.4514	-0.283	0	0	FDR <= 0.01
2712	J3KN16	Q5VYK3;J3KN16;R4GMY1;R4GMY3;F6XAQ5	Proteasome adapter and scaffold protein ECM29 OS=Homo sapiens OX=9606 GN=ECPAS PE=1 SV=1	53	53	424	cell organization and biogenesis;metabolic process	endoplasmic reticulum;endosome;membrane;nucleus;proteasome	protein binding;structural molecule activity	KIAA0368				25.1448	25.1125	0.0322	0.2385	0.3333	FDR > 0.05	25.0467	25.1125	-0.0658	0.0317	0.0534	FDR > 0.05
7190	Q92598	Q92598-2;Q92598;Q92598-4;Q92598-3;A0A0A0MSM0;R4GN69;Q5TBM3	Heat shock protein 105 kDa OS=Homo sapiens OX=9606 GN=HSPH1 PE=1 SV=1	42	38	376	metabolic process;regulation of biological process;response to stimulus;transport	cytoplasm;cytosol;extracellular;nucleus;organelle lumen	enzyme regulator activity;nucleotide binding;protein binding	HSPH1		Protein processing in endoplasmic reticulum	Scavenging by Class F Receptors; Regulation of HSF1-mediated heat shock response	26.0572	25.9938	0.0633	0.0387	0.0757	FDR > 0.05	26.1999	25.9938	0.206	0	0.0002	FDR <= 0.01
7480	P50454	P50454;E9PPV6;E9PR70;E9PMI5;E9PK86;E9PNX1;E9PKH2;E9PRS3;E9PIG2;E9PJH8;E9PQ34;E9PLA6;H0YEP8	Serpin H1 OS=Homo sapiens OX=9606 GN=SERPINH1 PE=1 SV=2	21	21	496	cell organization and biogenesis;metabolic process;regulation of biological process;response to stimulus	cytoplasm;endoplasmic reticulum;membrane;organelle lumen	enzyme regulator activity;protein binding;RNA binding	SERPINH1	Endochondral Ossification		Collagen biosynthesis and modifying enzymes	25.6534	26.3923	-0.7389	0	0	FDR <= 0.01	25.7266	26.3923	-0.6658	0	0	FDR <= 0.01																					Matrisome-associated	ECM Regulators
1240	P07900	P07900;P07900-2;G3V2J8;Q14568;Q58FG1;Q58FG0	Heat shock protein HSP 90-alpha OS=Homo sapiens OX=9606 GN=HSP90AA1 PE=1 SV=5	38	21	1126	cell organization and biogenesis;metabolic process;regulation of biological process;response to stimulus;transport	cytoplasm;cytosol;extracellular;membrane;nucleus;organelle lumen	catalytic activity;enzyme regulator activity;nucleotide binding;protein binding;RNA binding	HSP90AA1	Nucleotide-binding Oligomerization Domain (NOD) pathway; TNF alpha Signaling Pathway; Corticotropin-releasing hormone signaling pathway; Aryl Hydrocarbon Receptor; EBV LMP1 signaling; Aryl Hydrocarbon Receptor Pathway; Constitutive Androstane Receptor Pathway; NRF2 pathway; VEGFA-VEGFR2 Signaling Pathway; Focal Adhesion-PI3K-Akt-mTOR-signaling pathway	Prostate cancer; NOD-like receptor signaling pathway; Estrogen signaling pathway; Pathways in cancer; Antigen processing and presentation; Protein processing in endoplasmic reticulum; Progesterone-mediated oocyte maturation; PI3K-Akt signaling pathway	Sema3A PAK dependent Axon repulsion; Regulation of PLK1 Activity at G2/M Transition; Recruitment of NuMA to mitotic centrosomes; Loss of Nlp from mitotic centrosomes; Scavenging by Class F Receptors; Neutrophil degranulation; Uptake and function of diphtheria toxin; Regulation of actin dynamics for phagocytic cup formation; The role of GTSE1 in G2/M progression after G2 checkpoint; HSP90 chaperon…	26.5833	26.6919	-0.1086	0.0054	0.0147	FDR <= 0.05	26.7355	26.6919	0.0436	0.1671	0.225	FDR > 0.05
7822	P10909	P10909-2;P10909-6;P10909-4;P10909-5;P10909;P10909-3;H0YC35;H0YLK8;E7ERK6;E7ETB4;H0YAS8;E5RH61;E5RGB0;E5RG36;E5RJZ5	Clusterin OS=Homo sapiens OX=9606 GN=CLU PE=1 SV=1	8	8	48	cell death;cell organization and biogenesis;cell proliferation;defense response;metabolic process;regulation of biological process;response to stimulus;transport	cell surface;cytoplasm;cytosol;endoplasmic reticulum;extracellular;Golgi;membrane;mitochondrion;nucleus;organelle lumen	catalytic activity;protein binding	CLU	Complement and Coagulation Cascades	Complement and coagulation cascades	Platelet degranulation ; Terminal pathway of complement; Antimicrobial peptides; Regulation of Complement cascade	22.6466	23.3853	-0.7387	0	0	FDR <= 0.01	21.7994	23.3853	-1.5859	0	0	FDR <= 0.01											1.1054	0.0252	1.1346	0.0036	1.1295	0.1285	-0.9938	-1.3008	-1.2321	6
5019	E9PNQ8	P04216;E9PIM6;E9PNQ8;J3QRJ3	Thy-1 membrane glycoprotein (Fragment) OS=Homo sapiens OX=9606 GN=THY1 PE=1 SV=1	5	5	240	regulation of biological process		protein binding		Cardiac Progenitor Differentiation			22.86	23.5929	-0.7329	0.0001	0.0008	FDR <= 0.01	23.1983	23.5929	-0.3946	0.0067	0.014	FDR <= 0.05
5998	P78371	P78371;P78371-2;F5GWF6;F8VQ14	T-complex protein 1 subunit beta OS=Homo sapiens OX=9606 GN=CCT2 PE=1 SV=4	32	32	528	cell organization and biogenesis;metabolic process;regulation of biological process;transport	cytoplasm;cytosol;extracellular;organelle lumen	nucleotide binding;protein binding	CCT2			BBSome-mediated cargo-targeting to cilium; Prefoldin mediated transfer of substrate to CCT/TriC; Cooperation of PDCL (PhLP1) and TRiC/CCT in G-protein beta folding; Association of TriC/CCT with target proteins during biosynthesis; Neutrophil degranulation; Folding of actin by CCT/TriC; Formation of tubulin folding intermediates by CCT/TriC	26.013	25.9532	0.0598	0.0837	0.1431	FDR > 0.05	26.0312	25.9532	0.078	0.0328	0.055	FDR > 0.05
1542	Q13509	Q13509;A0A0B4J269;Q13509-2;G3V2A3;G3V3R4;G3V2R8;G3V2N6;G3V5W4;G3V3W7;G3V3J6	Tubulin beta-3 chain OS=Homo sapiens OX=9606 GN=TUBB3 PE=1 SV=2	23	7	1646	cell organization and biogenesis;cellular component movement	cytoplasm;cytoskeleton;nucleus	catalytic activity;nucleotide binding;protein binding;structural molecule activity	TUBB3	Pathogenic Escherichia coli infection; Parkin-Ubiquitin Proteasomal System pathway; Exercise-induced Circadian Regulation	Pathogenic Escherichia coli infection; Gap junction; Phagosome	COPI-independent Golgi-to-ER retrograde traffic; COPI-dependent Golgi-to-ER retrograde traffic; Carboxyterminal post-translational modifications of tubulin; Recruitment of NuMA to mitotic centrosomes; Hedgehog 'off' state; Translocation of GLUT4 to the plasma membrane; Prefoldin mediated transfer of substrate to CCT/TriC; Microtubule-dependent trafficking of connexons from Golgi to the plasma mem…	25.5914	25.6966	-0.1052	0.0106	0.0258	FDR <= 0.05	26.1263	25.6966	0.4297	0	0	FDR <= 0.01
3535	Q15113	Q15113	Procollagen C-endopeptidase enhancer 1 OS=Homo sapiens OX=9606 GN=PCOLCE PE=1 SV=2	13	13	90	development;metabolic process;regulation of biological process	extracellular	enzyme regulator activity;protein binding	PCOLCE			Collagen biosynthesis and modifying enzymes; Crosslinking of collagen fibrils	21.9046	22.637	-0.7324	0	0	FDR <= 0.01	22.2291	22.637	-0.4078	0	0	FDR <= 0.01																					Core matrisome	ECM Glycoproteins
1823	O75116	O75116;E9PF63;Q14DU5;D6REE7;C9JFJ0	Rho-associated protein kinase 2 OS=Homo sapiens OX=9606 GN=ROCK2 PE=1 SV=4	62	54	377	cell organization and biogenesis;metabolic process;regulation of biological process;response to stimulus	cytoplasm;cytoskeleton;cytosol;membrane;nucleus	catalytic activity;metal ion binding;motor activity;nucleotide binding;protein binding;RNA binding;structural molecule activity	ROCK2	Androgen receptor signaling pathway; MicroRNAs in cardiomyocyte hypertrophy; Integrin-mediated Cell Adhesion; Leptin signaling pathway; Pathogenic Escherichia coli infection; Spinal Cord Injury; Focal Adhesion; Association Between Physico-Chemical Features and Toxicity Associated Pathways; VEGFA-VEGFR2 Signaling Pathway; Chemokine signaling pathway; Regulation of Actin Cytoskeleton; G13 Signaling…	Regulation of actin cytoskeleton; Pathways in cancer; Vascular smooth muscle contraction; Shigellosis; Sphingolipid signaling pathway; Proteoglycans in cancer; cGMP-PKG signaling pathway; cAMP signaling pathway; Wnt signaling pathway; Chemokine signaling pathway; Oxytocin signaling pathway; Leukocyte transendothelial migration; Pathogenic Escherichia coli infection; Salmonella infection; Platelet…	EPHA-mediated growth cone collapse; G alpha (12/13) signalling events; EPHB-mediated forward signaling; RHO GTPases Activate ROCKs; Sema4D induced cell migration and growth-cone collapse; VEGFA-VEGFR2 Pathway	25.6522	25.6644	-0.0122	0.6468	0.7276	FDR > 0.05	25.3938	25.6644	-0.2706	0	0	FDR <= 0.01
3801	J3QTA6	Q9BRQ6;J3QTA6;J3QTB2	MICOS complex subunit OS=Homo sapiens OX=9606 GN=CHCHD6 PE=1 SV=1	6	1	25		cytosol;membrane;mitochondrion						20.2296	20.9618	-0.7322	0	0	FDR <= 0.01	20.6128	20.9618	-0.349	0	0.0001	FDR <= 0.01
2204	A0A1B0GW68	Q13510;A0A1B0GTM3;A0A1B0GUH5;A0A1B0GTP7;Q13510-2;A0A1B0GUA4;E7EMM4;A0A1B0GW68;A0A1B0GTZ5;A0A1B0GUW4;A0A1B0GUE3;A0A1B0GW48;A0A1B0GVJ1;A0A1B0GU06;A0A1B0GVE7;A0A1B0GUB3;A0A1B0GVG2;A0A1B0GV95;A0A1B0GU62;Q13510-3;A0A1B0GUG1;A0A1B0GW66;A0A1B0GUJ3;A0A1B0GVA3;A0A1B0GV06;A0A1B0GVC9	Acid ceramidase OS=Homo sapiens OX=9606 GN=ASAH1 PE=1 SV=1	10	10	110	metabolic process	vacuole						22.8296	23.5564	-0.7269	0	0	FDR <= 0.01	22.4669	23.5564	-1.0896	0	0	FDR <= 0.01											1.2036	-0.3076	1.1683	-0.1651	1.3961	-0.2828	-0.9342	-1.0794	-0.999	7
5732	Q13370	Q13370;Q13370-2	cGMP-inhibited 3',5'-cyclic phosphodiesterase B OS=Homo sapiens OX=9606 GN=PDE3B PE=1 SV=2	2	1	10	metabolic process;regulation of biological process;response to stimulus	cytosol;endoplasmic reticulum;Golgi;membrane	catalytic activity;metal ion binding;protein binding	PDE3B	Leptin signaling pathway	cGMP-PKG signaling pathway; Regulation of lipolysis in adipocytes; Progesterone-mediated oocyte maturation; Glucagon signaling pathway; Renin secretion; Insulin signaling pathway; cAMP signaling pathway; Morphine addiction; Purine metabolism	G alpha (s) signalling events; cGMP effects; PDE3B signalling	13.77	14.4927	-0.7227	0.0018	0.0061	FDR <= 0.01	13.3009	14.4927	-1.1918	0.0001	0.0003	FDR <= 0.01											1.1933	0.3452	1.0626	-0.88	1.1986	0.0771	-0.7397	-1.2198	-1.0373	7
1245	Q13885	Q13885;Q9BVA1	Tubulin beta-2A chain OS=Homo sapiens OX=9606 GN=TUBB2A PE=1 SV=1	23	4	1655	cell organization and biogenesis	cytoplasm;cytoskeleton;nucleus	catalytic activity;nucleotide binding;protein binding;structural molecule activity	TUBB2A	Pathogenic Escherichia coli infection; Parkin-Ubiquitin Proteasomal System pathway	Gap junction; Phagosome; Pathogenic Escherichia coli infection	COPI-independent Golgi-to-ER retrograde traffic; COPI-dependent Golgi-to-ER retrograde traffic; Carboxyterminal post-translational modifications of tubulin; Recruitment of NuMA to mitotic centrosomes; Hedgehog 'off' state; Translocation of GLUT4 to the plasma membrane; Prefoldin mediated transfer of substrate to CCT/TriC; Microtubule-dependent trafficking of connexons from Golgi to the plasma mem…	23.6808	23.834	-0.1533	0.0325	0.0655	FDR > 0.05	23.3977	23.834	-0.4363	0.0001	0.0003	FDR <= 0.01
3175	O75533	O75533;H7C341;B4DGZ4;A0A494C1M2;O75533-2	Splicing factor 3B subunit 1 OS=Homo sapiens OX=9606 GN=SF3B1 PE=1 SV=3	45	45	411	cell organization and biogenesis;metabolic process;regulation of biological process;response to stimulus	nucleus;spliceosomal complex	DNA binding;protein binding;receptor activity;RNA binding;signal transducer activity	SF3B1	mRNA Processing	Spliceosome	B-WICH complex positively regulates rRNA expression; mRNA Splicing - Major Pathway; mRNA Splicing - Minor Pathway	25.6504	25.623	0.0274	0.2612	0.3577	FDR > 0.05	25.4721	25.623	-0.1509	0.0002	0.0006	FDR <= 0.01
5923	P42785	P42785;P42785-2;E9PIG4;E9PQN3;E9PKN6;E9PQB5;E9PL85;E9PNF7;E9PNJ1;E9PLY4;E9PL49	Lysosomal Pro-X carboxypeptidase OS=Homo sapiens OX=9606 GN=PRCP PE=1 SV=1	14	14	210	defense response;metabolic process;regulation of biological process;response to stimulus;transport	membrane;vacuole	catalytic activity;protein binding	PRCP		Protein digestion and absorption; Renin-angiotensin system	Intrinsic Pathway of Fibrin Clot Formation; Neutrophil degranulation	24.2035	24.9249	-0.7214	0	0	FDR <= 0.01	25.9777	24.9249	1.0528	0	0	FDR <= 0.01											-0.1488	-1.0257	-0.1306	-1.0948	-0.1492	-1.1074	1.2544	1.1626	1.2395	1
3628	A2A2V1	P04156;A2A2V1;X6RKS3	Major prion protein (Fragment) OS=Homo sapiens OX=9606 GN=PRNP PE=1 SV=1	4	4	33	cell organization and biogenesis;cellular homeostasis;metabolic process;regulation of biological process;response to stimulus	cell surface;cytoplasm;cytosol;endoplasmic reticulum;Golgi;membrane	metal ion binding;protein binding;receptor activity;signal transducer activity	PRNP	Copper homeostasis			20.9474	21.6622	-0.7148	0	0	FDR <= 0.01	21.2088	21.6622	-0.4533	0	0.0001	FDR <= 0.01
5763	P22314	P22314;P22314-2;Q5JRR6;Q5JRR9;Q5JRS0;Q5JRS2;Q5JRS3;Q5JRS1	Ubiquitin-like modifier-activating enzyme 1 OS=Homo sapiens OX=9606 GN=UBA1 PE=1 SV=3	43	43	574	metabolic process;response to stimulus	cytoplasm;cytosol;membrane;mitochondrion;nucleus	catalytic activity;nucleotide binding;protein binding;RNA binding	UBA1	Proteasome Degradation; Parkin-Ubiquitin Proteasomal System pathway; Parkinsons Disease Pathway	Parkinson's disease; Ubiquitin mediated proteolysis	Synthesis of active ubiquitin: roles of E1 and E2 enzymes; Antigen processing: Ubiquitination & Proteasome degradation	27.0616	27.1317	-0.0701	0.029	0.0598	FDR > 0.05	27.4409	27.1317	0.3092	0	0	FDR <= 0.01
2555	Q99460	Q99460;Q99460-2;A0A087WW66;H7C378;C9J9M4;H7BZR6	26S proteasome non-ATPase regulatory subunit 1 OS=Homo sapiens OX=9606 GN=PSMD1 PE=1 SV=2	38	38	393	metabolic process;regulation of biological process;response to stimulus;transport	cytosol;extracellular;membrane;nucleus;organelle lumen;proteasome	catalytic activity;enzyme regulator activity;protein binding	PSMD1	Proteasome Degradation; Parkin-Ubiquitin Proteasomal System pathway	Epstein-Barr virus infection; Proteasome	Regulation of RAS by GAPs; CDT1 association with the CDC6:ORC:origin complex; Downstream TCR signaling; UCH proteinases; NIK-->noncanonical NF-kB signaling; Hh mutants that don't undergo autocatalytic processing are degraded by ERAD; SCF-beta-TrCP mediated degradation of Emi1; Neutrophil degranulation; Cross-presentation of soluble exogenous antigens (endosomes); Separation of Sister Chromatids; …	25.5529	25.5949	-0.0419	0.2749	0.3733	FDR > 0.05	25.6394	25.5949	0.0446	0.2483	0.3158	FDR > 0.05
4294	P16112	P16112;H0YMF1;A0A087X1T7;P16112-2;P16112-3;Q6PID9;A0A5K1VW97	Aggrecan core protein OS=Homo sapiens OX=9606 GN=ACAN PE=1 SV=3	12	11	53								20.502	21.2156	-0.7136	0	0	FDR <= 0.01	20.3971	21.2156	-0.8185	0	0	FDR <= 0.01																					Core matrisome	Proteoglycans
5499	P54756	B7ZKJ3;P54756-2;P54756-3;P54756;B7ZKW7;F8VP57;F8W9W0	Ephrin type-A receptor 5 OS=Homo sapiens OX=9606 GN=EPHA5 PE=1 SV=3	7	5	27	cellular component movement;metabolic process;regulation of biological process;response to stimulus	endoplasmic reticulum;membrane	catalytic activity;nucleotide binding;protein binding;receptor activity;signal transducer activity	EPHA5		Axon guidance	EPH-ephrin mediated repulsion of cells; EPHA-mediated growth cone collapse	19.7473	20.4583	-0.711	0	0	FDR <= 0.01	19.1146	20.4583	-1.3437	0	0	FDR <= 0.01											1.0441	-0.1714	1.1932	-0.0233	1.2688	0.0611	-1.3091	-1.0178	-1.0456	7
7484	P50395	P50395;P50395-2;Q5SX87;Q5SX91;Q5SX90;V9GYF8;V9GYJ7;Q5SX86	Rab GDP dissociation inhibitor beta OS=Homo sapiens OX=9606 GN=GDI2 PE=1 SV=2	31	21	553	metabolic process;regulation of biological process;response to stimulus;transport	cytoplasm;cytosol;extracellular;membrane;organelle lumen	catalytic activity;enzyme regulator activity;protein binding;RNA binding	GDI2			Neutrophil degranulation; RAB GEFs exchange GTP for GDP on RABs; Rho GTPase cycle	27.0081	27.0656	-0.0575	0.0538	0.0996	FDR > 0.05	27.0046	27.0656	-0.061	0.0435	0.0704	FDR > 0.05
3842	P21980	P21980;P21980-2;P21980-3;A2A299;A2A2A0	Protein-glutamine gamma-glutamyltransferase 2 OS=Homo sapiens OX=9606 GN=TGM2 PE=1 SV=2	13	13	78	cell organization and biogenesis;cellular homeostasis;metabolic process;regulation of biological process;response to stimulus;transport	cytoplasm;cytosol;endoplasmic reticulum;membrane;mitochondrion	catalytic activity;metal ion binding;nucleotide binding;protein binding	TGM2		Huntington's disease		21.0595	21.7704	-0.7109	0	0	FDR <= 0.01	20.8719	21.7704	-0.8985	0	0	FDR <= 0.01																					Matrisome-associated	ECM Regulators
2091	I6L894	I6L894;D6RHE1;A0A5F9ZH19;A0A5F9ZHN5;A0A5F9ZI40;A0A5F9ZGY3;A0A5F9ZHR8;A0A5F9ZGY4;A0A5F9ZI65;A0A5F9ZI30;A0A5F9ZHT8;A0A5F9ZHF7;A0A5F9ZHT4;A0A5F9ZI46;A0A5F9ZI45;A0A669KB19	Ankyrin-2 OS=Homo sapiens OX=9606 GN=ANK2 PE=1 SV=1	50	2	277	regulation of biological process;response to stimulus	nucleus	protein binding					23.9651	24.036	-0.0709	0.0122	0.029	FDR <= 0.05	24.4383	24.036	0.4023	0	0	FDR <= 0.01
3506	Q8N0Z8	Q8N0Z8	tRNA pseudouridine synthase-like 1 OS=Homo sapiens OX=9606 GN=PUSL1 PE=1 SV=1	2	2	11	metabolic process		catalytic activity;RNA binding	PUSL1				16.3033	17.0123	-0.709	0	0.0003	FDR <= 0.01	16.759	17.0123	-0.2533	0.0184	0.0334	FDR <= 0.05
5072	P51649	P51649-2;C9J8Q5;P51649;A0A5F9ZI23	Succinate-semialdehyde dehydrogenase, mitochondrial OS=Homo sapiens OX=9606 GN=ALDH5A1 PE=1 SV=2	6	6	23	cell organization and biogenesis;metabolic process	mitochondrion;organelle lumen	catalytic activity;nucleotide binding;protein binding	ALDH5A1		Alanine, aspartate and glutamate metabolism; Butanoate metabolism; Metabolic pathways	Degradation of GABA	20.3379	21.0451	-0.7072	0	0.0001	FDR <= 0.01	19.769	21.0451	-1.2761	0	0	FDR <= 0.01											1.133	-0.2916	1.1953	0.053	1.2144	-0.0085	-1.3143	-1.1228	-0.8585	7
2059	O14617	O14617;O14617-5;O14617-4;O14617-2;O14617-3;A0A2R8Y611;A0A2R8Y4J3;K7ERW8;K7ELX8;A0A087WYN6	AP-3 complex subunit delta-1 OS=Homo sapiens OX=9606 GN=AP3D1 PE=1 SV=1	41	41	350	cell organization and biogenesis;cellular component movement;metabolic process;regulation of biological process;transport	cytoplasm;Golgi;membrane	transporter activity	AP3D1		Lysosome		25.2898	25.2764	0.0134	0.61	0.6961	FDR > 0.05	25.4669	25.2764	0.1906	0.0001	0.0003	FDR <= 0.01
7005	Q9H936	Q9H936;A0A0D9SFE1;K4DIA8;A0A0D9SEI9;K4DIB6;K4DIB8;K4DIB3;K4DIA2;E9PQ36;E9PI74;K4DIB0;A0A0D9SFA8;A0A0D9SG84;E9PJH7;E9PS95;E9PJY0;A0A0A6YYN8;K4DIB4;Q9H1K4	Mitochondrial glutamate carrier 1 OS=Homo sapiens OX=9606 GN=SLC25A22 PE=1 SV=1	9	9	53	transport	membrane;mitochondrion	transporter activity	SLC25A22			Organic anion transporters	21.8136	22.5203	-0.7068	0	0	FDR <= 0.01	22.3191	22.5203	-0.2013	0.0002	0.0008	FDR <= 0.01
2476	Q5GLZ8	Q5GLZ8;Q5GLZ8-2;Q5GLZ8-3;Q5GLZ8-6;H0Y6K7;D6RCL5;Q5GLZ8-5;Q5GLZ8-4	Probable E3 ubiquitin-protein ligase HERC4 OS=Homo sapiens OX=9606 GN=HERC4 PE=1 SV=1	44	44	346	cell differentiation;metabolic process	cytoplasm;cytosol	catalytic activity	HERC4		Ubiquitin mediated proteolysis	Antigen processing: Ubiquitination & Proteasome degradation	25.4942	25.4646	0.0296	0.3765	0.4787	FDR > 0.05	25.392	25.4646	-0.0725	0.051	0.0808	FDR > 0.05
5300	P07099	P07099;B1AQP8;B1AQP9	Epoxide hydrolase 1 OS=Homo sapiens OX=9606 GN=EPHX1 PE=1 SV=1	18	18	227	metabolic process;response to stimulus	endoplasmic reticulum;membrane	catalytic activity;protein binding	EPHX1	Photodynamic therapy-induced NFE2L2 (NRF2) survival signaling; Benzene metabolism; Benzo(a)pyrene metabolism; Aflatoxin B1 metabolism; Metapathway biotransformation	Metabolism of xenobiotics by cytochrome P450; Bile secretion; Chemical carcinogenesis	Phase I - Functionalization of compounds	24.9734	25.6786	-0.7052	0	0	FDR <= 0.01	25.5252	25.6786	-0.1535	0.0005	0.0015	FDR <= 0.01
714	P07864	P07864;F5H245	L-lactate dehydrogenase C chain OS=Homo sapiens OX=9606 GN=LDHC PE=1 SV=4	2	1	99	cellular component movement;metabolic process	cytoplasm;cytosol;nucleus	catalytic activity	LDHC	Glycolysis and Gluconeogenesis	Metabolic pathways; Pyruvate metabolism; Cysteine and methionine metabolism; Glucagon signaling pathway; Glycolysis / Gluconeogenesis; Propanoate metabolism	Pyruvate metabolism	14.1132	14.7907	-0.6775	0.2799	0.378	FDR > 0.05	14.5642	14.7907	-0.2265	0.7085	0.7598	FDR > 0.05
8316	P30837	P30837	Aldehyde dehydrogenase X, mitochondrial OS=Homo sapiens OX=9606 GN=ALDH1B1 PE=1 SV=3	19	17	152	metabolic process	mitochondrion;organelle lumen	catalytic activity;nucleotide binding	ALDH1B1		Pentose and glucuronate interconversions; beta-Alanine metabolism; Metabolic pathways; Fatty acid degradation; Pyruvate metabolism; Tryptophan metabolism; Ascorbate and aldarate metabolism; Glycerolipid metabolism; Arginine and proline metabolism; Lysine degradation; Glycolysis / Gluconeogenesis; Valine, leucine and isoleucine degradation; Histidine metabolism	Ethanol oxidation	23.2546	23.9589	-0.7043	0	0	FDR <= 0.01	23.3241	23.9589	-0.6348	0	0	FDR <= 0.01
4399	Q93008-1	Q93008-1;Q93008;O00507;O00507-2	Isoform 2 of Probable ubiquitin carboxyl-terminal hydrolase FAF-X OS=Homo sapiens OX=9606 GN=USP9X	57	57	380	cell division;cell growth;cellular component movement;metabolic process;regulation of biological process;response to stimulus	cytoplasm;cytosol;membrane	catalytic activity;protein binding	USP9X				25.3157	25.2982	0.0175	0.5022	0.6027	FDR > 0.05	25.4468	25.2982	0.1486	0.0003	0.0011	FDR <= 0.01
4379	P35869	P35869;A0A1B0GVI7;A0A2R8Y7G1	Aryl hydrocarbon receptor OS=Homo sapiens OX=9606 GN=AHR PE=1 SV=2	7	7	35	cell death;metabolic process;regulation of biological process;response to stimulus	cytoplasm;cytosol;nucleus	DNA binding;protein binding;receptor activity;signal transducer activity	AHR	Integrated Breast Cancer Pathway; Adipogenesis; Aryl Hydrocarbon Receptor; Aryl Hydrocarbon Receptor Pathway; Development and heterogeneity of the ILC family		Aryl hydrocarbon receptor signalling; PPARA activates gene expression; Endogenous sterols; Xenobiotics	19.7882	20.4916	-0.7034	0	0	FDR <= 0.01	19.2728	20.4916	-1.2188	0	0	FDR <= 0.01											1.2407	-0.1892	1.0935	-0.1265	1.2755	-0.0374	-0.9694	-1.2653	-1.0218	7
6087	Q9C0C2	Q9C0C2;Q9C0C2-2;A0A2R8Y5C4;E9PKK0;E9PKE7	182 kDa tankyrase-1-binding protein OS=Homo sapiens OX=9606 GN=TNKS1BP1 PE=1 SV=4	49	49	505	cell organization and biogenesis;metabolic process;regulation of biological process;response to stimulus	chromosome;cytoplasm;cytoskeleton;cytosol;nucleus	protein binding	TNKS1BP1			TP53 regulates transcription of additional cell cycle genes whose exact role in the p53 pathway remain uncertain; Deadenylation of mRNA	24.6721	24.6469	0.0252	0.304	0.4038	FDR > 0.05	24.8532	24.6469	0.2063	0	0.0001	FDR <= 0.01
4322	O14980	O14980;C9JKM9;C9J673;C9IZS4;C9JV99;C9JQ02;F8WF71;H7BZC5;C9IYM2;C9JF49	Exportin-1 OS=Homo sapiens OX=9606 GN=XPO1 PE=1 SV=1	38	37	391	cell organization and biogenesis;regulation of biological process;response to stimulus;transport	chromosome;cytoplasm;cytosol;membrane;nucleus	protein binding;RNA binding;transporter activity	XPO1	eIF5A regulation in response to inhibition of the nuclear export system	Ribosome biogenesis in eukaryotes; Influenza A; HTLV-I infection; Epstein-Barr virus infection; RNA transport	Rev-mediated nuclear export of HIV RNA; Downregulation of TGF-beta receptor signaling; NEP/NS2 Interacts with the Cellular Export Machinery; Cyclin A/B1/B2 associated events during G2/M transition; Amplification of signal from unattached kinetochores via a MAD2 inhibitory signal; Deactivation of the beta-catenin transactivating complex; Separation of Sister Chromatids; Resolution of Sister Chroma…	25.2189	25.1045	0.1143	0.0104	0.0255	FDR <= 0.05	25.0324	25.1045	-0.0722	0.0688	0.1044	FDR > 0.05
1663	A0A0A0MRF6	Q99996;A0A0A0MRF6;Q99996-6;Q99996-1;Q99996-3;Q99996-5;A0A0A0MRE9;A0A087WX84;Q99996-4;A0A6I8PUA5;H7BYL6;A0A6I8PUD8;Q6PJH3;H7BZV6;A0A2R8Y590	A-kinase anchor protein 9 OS=Homo sapiens OX=9606 GN=AKAP9 PE=1 SV=1	60	60	248	regulation of biological process;response to stimulus	Golgi	DNA binding;protein binding;structural molecule activity					23.7066	23.6945	0.0121	0.6866	0.7605	FDR > 0.05	23.4094	23.6945	-0.2851	0	0.0001	FDR <= 0.01
4044	P15924	P15924;P15924-3;P15924-2	Desmoplakin OS=Homo sapiens OX=9606 GN=DSP PE=1 SV=3	69	69	289	cell death;cell differentiation;cell organization and biogenesis;metabolic process;regulation of biological process;response to stimulus;transport	cytoplasm;cytoskeleton;membrane;nucleus	catalytic activity;motor activity;protein binding;RNA binding;structural molecule activity	DSP	Arrhythmogenic Right Ventricular Cardiomyopathy; Lung fibrosis	Arrhythmogenic right ventricular cardiomyopathy (ARVC)	Apoptotic cleavage of cell adhesion proteins; Formation of the cornified envelope; Neutrophil degranulation	23.9648	24.0308	-0.066	0.6832	0.7577	FDR > 0.05	24.1858	24.0308	0.155	0.3493	0.4201	FDR > 0.05
6343	P58005	P58005;P58005-4	Sestrin-3 OS=Homo sapiens OX=9606 GN=SESN3 PE=1 SV=2	3	3	12	cell communication;metabolic process;regulation of biological process;response to stimulus	cytoplasm;nucleus	antioxidant activity;catalytic activity;protein binding	SESN3	Angiopoietin Like Protein 8 Regulatory Pathway	p53 signaling pathway; Longevity regulating pathway	TP53 Regulates Metabolic Genes	20.8716	21.5747	-0.7031	0	0	FDR <= 0.01	19.8101	21.5747	-1.7645	0	0	FDR <= 0.01											1.049	0.1906	1.1318	0.128	1.015	0.1455	-1.368	-1.2374	-1.0545	6
7197	Q13464	Q13464;A0A0U1RQV4;J3KRH6	Rho-associated protein kinase 1 OS=Homo sapiens OX=9606 GN=ROCK1 PE=1 SV=1	62	54	418	cell death;cell organization and biogenesis;cellular component movement;metabolic process;regulation of biological process;response to stimulus;transport	cytoplasm;cytoskeleton;cytosol;extracellular;Golgi;membrane;organelle lumen	catalytic activity;metal ion binding;motor activity;nucleotide binding;protein binding	ROCK1	Androgen receptor signaling pathway; MicroRNAs in cardiomyocyte hypertrophy; Integrin-mediated Cell Adhesion; Leptin signaling pathway; Regulation of Microtubule Cytoskeleton; Pathogenic Escherichia coli infection; AGE/RAGE pathway; Focal Adhesion; TGF-beta Signaling Pathway; VEGFA-VEGFR2 Signaling Pathway; Chemokine signaling pathway; EGF/EGFR Signaling Pathway; Regulation of Actin Cytoskeleton;…	Axon guidance; Salmonella infection; Oxytocin signaling pathway; TGF-beta signaling pathway; Platelet activation; Sphingolipid signaling pathway; Focal adhesion; MicroRNAs in cancer; Regulation of actin cytoskeleton; Vascular smooth muscle contraction; Shigellosis; Proteoglycans in cancer; cAMP signaling pathway; Pathways in cancer; Chemokine signaling pathway; cGMP-PKG signaling pathway; Leukocy…	EPHA-mediated growth cone collapse; G alpha (12/13) signalling events; EPHB-mediated forward signaling; RHO GTPases Activate ROCKs; Neutrophil degranulation; Sema4D induced cell migration and growth-cone collapse; Apoptotic cleavage of cellular proteins; VEGFA-VEGFR2 Pathway	24.935	25.0272	-0.0922	0.0039	0.0112	FDR <= 0.05	25.0701	25.0272	0.0429	0.0988	0.1425	FDR > 0.05
6438	Q6UWF9	Q6UWF9	Protein FAM180A OS=Homo sapiens OX=9606 GN=FAM180A PE=2 SV=1	3	3	25		extracellular		FAM180A				20.8293	21.5322	-0.7029	0	0	FDR <= 0.01	21.499	21.5322	-0.0332	0.5911	0.6531	FDR > 0.05
365	Q6PGP7	Q6PGP7;D6RCE2;H0Y964	Tetratricopeptide repeat protein 37 OS=Homo sapiens OX=9606 GN=TTC37 PE=1 SV=1	51	50	275	metabolic process	cytoplasm;cytosol;nucleus	protein binding	TTC37		RNA degradation	mRNA decay by 3' to 5' exoribonuclease	24.4449	24.5256	-0.0808	0.016	0.0366	FDR <= 0.05	24.3408	24.5256	-0.1848	0.0001	0.0005	FDR <= 0.01
6182	Q96CX2	Q96CX2	BTB/POZ domain-containing protein KCTD12 OS=Homo sapiens OX=9606 GN=KCTD12 PE=1 SV=1	15	12	98	cell organization and biogenesis;transport	membrane	protein binding;RNA binding;transporter activity	KCTD12				21.9501	22.6524	-0.7023	0	0	FDR <= 0.01	24.8106	22.6524	2.1582	0	0	FDR <= 0.01											-0.3947	-0.9278	-0.3279	-0.9396	-0.4048	-0.8914	1.2904	1.3093	1.2865	1
5866	Q99470	Q99470;K7ELI9	Stromal cell-derived factor 2 OS=Homo sapiens OX=9606 GN=SDF2 PE=1 SV=2	5	5	40	metabolic process;response to stimulus	extracellular;membrane	catalytic activity	SDF2				20.4139	21.1162	-0.7022	0.0003	0.0013	FDR <= 0.01	20.5875	21.1162	-0.5287	0.0017	0.0042	FDR <= 0.01
6449	A0AVT1	A0AVT1;A0AVT1-2;H0Y8S8;H0Y9U5	Ubiquitin-like modifier-activating enzyme 6 OS=Homo sapiens OX=9606 GN=UBA6 PE=1 SV=1	45	32	318	metabolic process;response to stimulus	cytoplasm;cytosol	catalytic activity;nucleotide binding;protein binding	UBA6		Ubiquitin mediated proteolysis	Synthesis of active ubiquitin: roles of E1 and E2 enzymes; Antigen processing: Ubiquitination & Proteasome degradation	25.1874	25.0922	0.0952	0.005	0.0139	FDR <= 0.05	25.0681	25.0922	-0.0241	0.3604	0.4317	FDR > 0.05
1592	Q8NDX5	Q8NDX5;Q8NDX5-2;Q8NDX5-7	Polyhomeotic-like protein 3 OS=Homo sapiens OX=9606 GN=PHC3 PE=1 SV=1	2	1	7	development;regulation of biological process	nucleus	DNA binding;metal ion binding;protein binding	PHC3			RUNX1 interacts with co-factors whose precise effect on RUNX1 targets is not known; SUMOylation of chromatin organization proteins; Regulation of PTEN gene transcription; Transcriptional Regulation by E2F6; SUMOylation of DNA damage response and repair proteins; Oxidative Stress Induced Senescence; SUMOylation of RNA binding proteins	12.4277	13.1263	-0.6987	0.0031	0.0094	FDR <= 0.01	12.7596	13.1263	-0.3668	0.0599	0.0927	FDR > 0.05
7861	Q5VTE0	Q5VTE0	Putative elongation factor 1-alpha-like 3 OS=Homo sapiens OX=9606 GN=EEF1A1P5 PE=5 SV=1	30	2	1785	metabolic process	cytoplasm;nucleus	catalytic activity;nucleotide binding;RNA binding	EEF1A1P5			Eukaryotic Translation Elongation	28.6062	28.6325	-0.0263	0.4086	0.5119	FDR > 0.05	28.6185	28.6325	-0.014	0.6536	0.71	FDR > 0.05
6349	P06396-3	P06396-3;A0A0U1RQL8	Isoform 3 of Gelsolin OS=Homo sapiens OX=9606 GN=GSN	35	1	628	cell death;cell organization and biogenesis;metabolic process;regulation of biological process;response to stimulus;transport	cytoplasm;cytoskeleton;cytosol;extracellular;membrane;nucleus;organelle lumen	metal ion binding;protein binding	GSN	Regulation of Actin Cytoskeleton; Senescence and Autophagy in Cancer			20.295	20.2045	0.0905	0.1865	0.2744	FDR > 0.05	20.6798	20.2045	0.4753	0.0001	0.0003	FDR <= 0.01
6857	Q5SW79-2	Q5SW79-2;E7EMW0	Isoform 2 of Centrosomal protein of 170 kDa OS=Homo sapiens OX=9606 GN=CEP170	53	1	305		cytosol;membrane	protein binding	CEP170				17.2458	16.9512	0.2947	0.0775	0.1345	FDR > 0.05	17.2633	16.9512	0.3121	0.0643	0.0986	FDR > 0.05
1294	A0A0A0MQV1	A0A0A0MQV1;P28845	Corticosteroid 11-beta-dehydrogenase isozyme 1 (Fragment) OS=Homo sapiens OX=9606 GN=HSD11B1 PE=1 SV=6	3	3	16	metabolic process	membrane	catalytic activity					19.1604	19.8541	-0.6937	0	0	FDR <= 0.01	20.4825	19.8541	0.6284	0	0	FDR <= 0.01
2548	P39060	P39060;P39060-1;P39060-2;H7BXV5;H7C457	Collagen alpha-1(XVIII) chain OS=Homo sapiens OX=9606 GN=COL18A1 PE=1 SV=5	10	10	48	cell organization and biogenesis;metabolic process;regulation of biological process;response to stimulus	extracellular;organelle lumen	metal ion binding;protein binding;structural molecule activity	COL18A1		Protein digestion and absorption	Collagen degradation; Activation of Matrix Metalloproteinases; Integrin cell surface interactions; Laminin interactions; Assembly of collagen fibrils and other multimeric structures; Collagen chain trimerization	20.6254	21.3173	-0.6919	0	0	FDR <= 0.01	21.1532	21.3173	-0.1641	0.0005	0.0014	FDR <= 0.01																					Core matrisome	Collagens
343	P08133	P08133;P08133-2;E5RK69;E7EMC6;E5RFF0;E5RI05;E5RIU8;E5RJR0;E5RK63;E5RJF5;H0YC77	Annexin A6 OS=Homo sapiens OX=9606 GN=ANXA6 PE=1 SV=3	39	39	712	cell organization and biogenesis;cellular homeostasis;regulation of biological process;response to stimulus;transport	cytoplasm;membrane;mitochondrion	metal ion binding;nucleotide binding;protein binding;transporter activity	ANXA6	Calcium Regulation in the Cardiac Cell; Prostaglandin Synthesis and Regulation		Smooth Muscle Contraction	28.6335	28.647	-0.0135	0.7551	0.8159	FDR > 0.05	28.8389	28.647	0.1919	0.0018	0.0045	FDR <= 0.01																					Matrisome-associated	ECM-affiliated Proteins
989	F5H5D3	Q9BQE3;F5H5D3;A0A1W2PQM2;F8VVB9;F8VQQ4	Tubulin alpha chain OS=Homo sapiens OX=9606 GN=TUBA1C PE=1 SV=1	27	4	1480	cell division;cell organization and biogenesis;transport	cytoplasm;cytoskeleton;nucleus	catalytic activity;nucleotide binding;protein binding;structural molecule activity	TUBA1C	Pathogenic Escherichia coli infection; Parkin-Ubiquitin Proteasomal System pathway			29.2522	29.2085	0.0437	0.3596	0.4611	FDR > 0.05	29.0993	29.2085	-0.1092	0.0412	0.0672	FDR > 0.05
8046	O43795-2	O43795-2	Isoform 2 of Unconventional myosin-Ib OS=Homo sapiens OX=9606 GN=MYO1B	48	1	486	cell organization and biogenesis;cellular component movement;transport	cytoplasm;endosome;membrane	catalytic activity;motor activity;nucleotide binding;protein binding	MYO1B				15.9152	15.9528	-0.0376	0.7693	0.8263	FDR > 0.05	16.0382	15.9528	0.0854	0.5105	0.5774	FDR > 0.05
731	Q99832	Q99832;Q99832-3;Q99832-4;Q99832-2;F8WAM2;A0A0D9SG95;F8WBP8	T-complex protein 1 subunit eta OS=Homo sapiens OX=9606 GN=CCT7 PE=1 SV=2	33	33	395	metabolic process;regulation of biological process;transport	cytoplasm;cytosol;mitochondrion	nucleotide binding;protein binding	CCT7			Prefoldin mediated transfer of substrate to CCT/TriC; Cooperation of PDCL (PhLP1) and TRiC/CCT in G-protein beta folding; Association of TriC/CCT with target proteins during biosynthesis; Formation of tubulin folding intermediates by CCT/TriC; Folding of actin by CCT/TriC	26.1329	26.0878	0.0451	0.1912	0.2802	FDR > 0.05	26.1219	26.0878	0.0341	0.3116	0.3814	FDR > 0.05
5945	P15848	P15848;P15848-2;A0A2U3U034	Arylsulfatase B OS=Homo sapiens OX=9606 GN=ARSB PE=1 SV=1	16	16	120	cell organization and biogenesis;cellular component movement;metabolic process;regulation of biological process;response to stimulus;transport	cell surface;endoplasmic reticulum;extracellular;Golgi;mitochondrion;organelle lumen;vacuole	catalytic activity;metal ion binding	ARSB		Metabolic pathways; Lysosome; Glycosaminoglycan degradation	MPS VI - Maroteaux-Lamy syndrome; Neutrophil degranulation; CS/DS degradation; The activation of arylsulfatases; Glycosphingolipid metabolism	22.8831	23.569	-0.6859	0	0	FDR <= 0.01	23.2958	23.569	-0.2732	0.0008	0.0023	FDR <= 0.01
6567	O43491	O43491;O43491-3;O43491-2;E9PII3;A0A2R8Y5B3;Q6R5J7;E9PMV8;Q6ZSX4;E9PQD2;E9PRG1;E9PIG0;E9PN54;E9PQN0;E9PJP4;E9PPC9	Band 4.1-like protein 2 OS=Homo sapiens OX=9606 GN=EPB41L2 PE=1 SV=1	47	27	350	cell division;cell organization and biogenesis;transport	cytoplasm;cytoskeleton;cytosol;membrane;nucleus	protein binding;structural molecule activity	EPB41L2		Tight junction	Neurexins and neuroligins	25.747	25.7342	0.0127	0.6823	0.757	FDR > 0.05	25.7779	25.7342	0.0437	0.1838	0.244	FDR > 0.05
890	A0A0B4J1R6	A0A0B4J1R6	Transketolase OS=Homo sapiens OX=9606 GN=TKT PE=1 SV=1	27	1	343	metabolic process;regulation of biological process	cytosol	catalytic activity;metal ion binding;protein binding	TKT	Pentose Phosphate Pathway			17.8754	18.5559	-0.6805	0	0	FDR <= 0.01	18.3486	18.5559	-0.2073	0.0092	0.0183	FDR <= 0.05
2240	P18859	P18859;P18859-2;A8MUH2	ATP synthase-coupling factor 6, mitochondrial OS=Homo sapiens OX=9606 GN=ATP5PF PE=1 SV=1	3	3	86	cell organization and biogenesis;metabolic process;transport	membrane;mitochondrion	catalytic activity;transporter activity	ATP5J	Electron Transport Chain; Oxidative phosphorylation	Oxidative phosphorylation; Huntington's disease; Alzheimer's disease; Metabolic pathways; Parkinson's disease	Cristae formation; Formation of ATP by chemiosmotic coupling	23.1948	23.8703	-0.6755	0	0.0001	FDR <= 0.01	23.3663	23.8703	-0.504	0.0001	0.0002	FDR <= 0.01
7784	Q8IVL5	Q8IVL5;Q8IVL5-2;C9J313;C9JSL4	Prolyl 3-hydroxylase 2 OS=Homo sapiens OX=9606 GN=P3H2 PE=1 SV=1	21	20	135	metabolic process;regulation of biological process	endoplasmic reticulum;Golgi;organelle lumen	catalytic activity;metal ion binding;protein binding	LEPREL1; P3H2			Collagen biosynthesis and modifying enzymes	22.7578	23.4262	-0.6685	0	0	FDR <= 0.01	22.0026	23.4262	-1.4237	0	0	FDR <= 0.01											1.2109	0.082	1.0838	0.0287	1.0919	0.0296	-1.2164	-1.0873	-1.2233	6	Matrisome-associated	ECM Regulators
7814	P50416	P50416;P50416-2;H3BP22;H3BUV7;H3BUJ0	Carnitine O-palmitoyltransferase 1, liver isoform OS=Homo sapiens OX=9606 GN=CPT1A PE=1 SV=2	24	22	226	cell differentiation;cell organization and biogenesis;metabolic process;regulation of biological process;response to stimulus;transport	membrane;mitochondrion	catalytic activity;protein binding	CPT1A	AMP-activated Protein Kinase (AMPK) Signaling; Fatty Acid Beta Oxidation; PPAR Alpha Pathway; Mitochondrial LC-Fatty Acid Beta-Oxidation; Leptin and adiponectin; PPAR signaling pathway; Sudden Infant Death Syndrome (SIDS) Susceptibility Pathways	PPAR signaling pathway; Fatty acid metabolism; AMPK signaling pathway; Fatty acid degradation; Adipocytokine signaling pathway; Glucagon signaling pathway; Insulin resistance	RORA activates gene expression; Signaling by Retinoic Acid; Import of palmitoyl-CoA into the mitochondrial matrix; PPARA activates gene expression	23.192	23.8573	-0.6654	0	0	FDR <= 0.01	23.5323	23.8573	-0.3251	0	0	FDR <= 0.01
1582	P11498	P11498;A0A494C016;A0A494C101;A0A494C0T2;P11498-2;E9PRE7;E9PS68;A0A494BZT5	Pyruvate carboxylase, mitochondrial OS=Homo sapiens OX=9606 GN=PC PE=1 SV=2	40	39	280	metabolic process;regulation of biological process	cytoplasm;cytosol;mitochondrion;organelle lumen	catalytic activity;metal ion binding;nucleotide binding;protein binding	PC	Alanine and aspartate metabolism; TCA Cycle and Deficiency of Pyruvate Dehydrogenase complex (PDHc); Fatty Acid Biosynthesis; Amino Acid metabolism; Glycolysis and Gluconeogenesis	Carbon metabolism; Biosynthesis of amino acids; Citrate cycle (TCA cycle); Metabolic pathways; Pyruvate metabolism	Gluconeogenesis; Biotin transport and metabolism; Defective HLCS causes multiple carboxylase deficiency	24.8806	24.9484	-0.0679	0.0409	0.0792	FDR > 0.05	24.7786	24.9484	-0.1698	0.0003	0.001	FDR <= 0.01
7964	P17342	P17342-2;P17342;P17342-3;C9JK69;D6RDL8;H0Y9B9	Atrial natriuretic peptide receptor 3 OS=Homo sapiens OX=9606 GN=NPR3 PE=1 SV=2	12	12	55	cell proliferation;regulation of biological process;response to stimulus;transport	membrane	protein binding;receptor activity;signal transducer activity	NPR3				22.5536	23.2185	-0.6649	0	0.0003	FDR <= 0.01	21.7952	23.2185	-1.4233	0	0	FDR <= 0.01											1.1342	0.0628	1.0719	0.055	1.1395	0.0321	-1.3954	-1.2803	-0.8197	6
5305	P05091	P05091;P05091-2;F8VP50;F8VP50;S4R3S4	Aldehyde dehydrogenase, mitochondrial OS=Homo sapiens OX=9606 GN=ALDH2 PE=1 SV=2	20	18	170	metabolic process	mitochondrion;organelle lumen	catalytic activity;nucleotide binding	ALDH2	Fatty Acid Omega Oxidation; Tryptophan metabolism	Histidine metabolism; Tryptophan metabolism; Glycerolipid metabolism; Ascorbate and aldarate metabolism; Pentose and glucuronate interconversions; beta-Alanine metabolism; Arginine and proline metabolism; Lysine degradation; Metabolic pathways; Fatty acid degradation; Glycolysis / Gluconeogenesis; Pyruvate metabolism; Valine, leucine and isoleucine degradation	Ethanol oxidation; Metabolism of serotonin	24.8949	25.558	-0.6632	0	0	FDR <= 0.01	25.0526	25.558	-0.5055	0	0	FDR <= 0.01
2433	P35221	P35221-2;P35221;G3XAM7;P35221-3;E5RIB1;E5RGY7;E5RG03;E5RJ41;E5RGY6;E5RHV7;H0YBB8;E5RIE0;E5RJL0;E5RJP7;E5RGD2;E5RFM5;E5RFG3;E5RFK9;E5RFM3;A0A087WZL6;E5RHJ5;E5RGU3	Catenin alpha-1 OS=Homo sapiens OX=9606 GN=CTNNA1 PE=1 SV=1	35	26	322	cell organization and biogenesis;regulation of biological process;response to stimulus	cytoplasm;cytoskeleton;cytosol;Golgi;membrane	protein binding;RNA binding;structural molecule activity	CTNNA1	Arrhythmogenic Right Ventricular Cardiomyopathy; Apoptosis-related network due to altered Notch3 in ovarian cancer; VEGFA-VEGFR2 Signaling Pathway; White fat cell differentiation	Hippo signaling pathway; Pathways in cancer; Arrhythmogenic right ventricular cardiomyopathy (ARVC); Bacterial invasion of epithelial cells; Adherens junction; Endometrial cancer; Tight junction; Leukocyte transendothelial migration	Adherens junctions interactions; CDO in myogenesis; VEGFR2 mediated vascular permeability; RHO GTPases activate IQGAPs	25.8927	25.9156	-0.0228	0.4495	0.552	FDR > 0.05	25.8559	25.9156	-0.0597	0.0713	0.1076	FDR > 0.05
246	Q8TAE6	Q8TAE6	Protein phosphatase 1 regulatory subunit 14C OS=Homo sapiens OX=9606 GN=PPP1R14C PE=1 SV=3	2	2	7	regulation of biological process	cytoplasm;membrane	enzyme regulator activity	PPP1R14C				18.5895	19.2505	-0.661	0	0.0001	FDR <= 0.01	18.6144	19.2505	-0.6361	0	0.0001	FDR <= 0.01
44	Q92538	Q92538-3;Q92538;Q92538-2;A0A669KB10;A0A669KBG8	Golgi-specific brefeldin A-resistance guanine nucleotide exchange factor 1 OS=Homo sapiens OX=9606 GN=GBF1 PE=1 SV=2	45	45	309	cell organization and biogenesis;cellular component movement;metabolic process;regulation of biological process;response to stimulus;transport	cytoplasm;cytosol;Golgi;membrane;mitochondrion;organelle lumen	protein binding	GBF1		Endocytosis	Clathrin derived vesicle budding; COPI-dependent Golgi-to-ER retrograde traffic; VxPx cargo-targeting to cilium; COPI-mediated anterograde transport	24.312	24.3795	-0.0674	0.0905	0.1525	FDR > 0.05	24.1674	24.3795	-0.212	0.0003	0.001	FDR <= 0.01
3011	P06396-2	P06396-2;Q5T0I0	Isoform 2 of Gelsolin OS=Homo sapiens OX=9606 GN=GSN	36	2	655	cell death;cell organization and biogenesis;metabolic process;regulation of biological process;response to stimulus;transport	cytoplasm;cytoskeleton;cytosol;extracellular;membrane;nucleus;organelle lumen	metal ion binding;protein binding	GSN	Regulation of Actin Cytoskeleton; Senescence and Autophagy in Cancer			27.458	27.4863	-0.0283	0.3922	0.4955	FDR > 0.05	27.5444	27.4863	0.0581	0.1002	0.1444	FDR > 0.05
5211	Q9UBN4	Q9UBN4;Q9UBN4-6;Q9UBN4-5	Short transient receptor potential channel 4 OS=Homo sapiens OX=9606 GN=TRPC4 PE=1 SV=1	2	1	8	cell differentiation;cellular homeostasis;transport	cell surface;cytoskeleton;membrane	protein binding;transporter activity	TRPC4		Axon guidance	TRP channels; Role of second messengers in netrin-1 signaling	12.8337	13.3434	-0.5097	0.2744	0.3727	FDR > 0.05	11.9958	13.3434	-1.3476	0.0146	0.0275	FDR <= 0.05
1149	P19367	P19367;P19367-2;P19367-3;P19367-4;B1AR63;B1AR62;Q2TB90	Hexokinase-1 OS=Homo sapiens OX=9606 GN=HK1 PE=1 SV=3	41	38	443	cellular homeostasis;metabolic process;regulation of biological process	cytosol;membrane;mitochondrion	catalytic activity;nucleotide binding;protein binding	HK1	Cori Cycle; Photodynamic therapy-induced HIF-1 survival signaling; Glycolysis and Gluconeogenesis; Glucuronidation	Glycolysis / Gluconeogenesis; Type II diabetes mellitus; Insulin signaling pathway; Metabolic pathways; Starch and sucrose metabolism; Carbon metabolism; Carbohydrate digestion and absorption; HIF-1 signaling pathway; Fructose and mannose metabolism; Neomycin, kanamycin and gentamicin biosynthesis; Galactose metabolism; Amino sugar and nucleotide sugar metabolism; Central carbon metabolism in can…	Glycolysis; Defective HK1 causes hexokinase deficiency (HK deficiency)	26.1389	26.1816	-0.0426	0.1347	0.2105	FDR > 0.05	26.8417	26.1816	0.6601	0	0	FDR <= 0.01
3169	A5YKK6	A5YKK6;A5YKK6-2;A5YKK6-3;A5YKK6-4;H3BMZ2;H3BVC9;H3BR89;H3BMH0;H3BNB1	CCR4-NOT transcription complex subunit 1 OS=Homo sapiens OX=9606 GN=CNOT1 PE=1 SV=2	54	53	303	development;metabolic process;regulation of biological process;response to stimulus	cytoplasm;cytosol;membrane;nucleus	catalytic activity;protein binding;RNA binding;structural molecule activity	CNOT1		RNA degradation	TP53 regulates transcription of additional cell cycle genes whose exact role in the p53 pathway remain uncertain; Deadenylation of mRNA	24.1713	24.1357	0.0356	0.1524	0.2331	FDR > 0.05	24.1325	24.1357	-0.0032	0.8915	0.913	FDR > 0.05
7612	Q8NFJ5	Q8NFJ5;A0A3B3ITN8;F5GWG3	Retinoic acid-induced protein 3 OS=Homo sapiens OX=9606 GN=GPRC5A PE=1 SV=2	5	5	45	regulation of biological process;response to stimulus	membrane	protein binding;receptor activity;signal transducer activity	GPRC5A	GPCRs, Class C Metabotropic glutamate, pheromone			20.9183	21.5791	-0.6608	0	0	FDR <= 0.01	20.8055	21.5791	-0.7736	0	0	FDR <= 0.01
2119	P42224	P42224;P42224-2;J3KPM9;A0A669KB53;A0A669KB56;A0A669KB68;A0A669KBA4;A0A669KBI6;A0A669KB52;A0A669KB75;E7EPD2;D2KFR9;E7EPD2;A0A669KB17;E7ENM1;E9PH66;Q67C41;H7BZB5	Signal transducer and activator of transcription 1-alpha/beta OS=Homo sapiens OX=9606 GN=STAT1 PE=1 SV=2	31	31	413	cell death;cell differentiation;cell proliferation;cellular component movement;defense response;metabolic process;regulation of biological process;response to stimulus	cytoplasm;cytosol;nucleus	DNA binding;protein binding;signal transducer activity	STAT1	IL-5 Signaling Pathway; Regulation of toll-like receptor signaling pathway; RANKL/RANK (Receptor activator of NFKB (ligand)) Signaling Pathway; Human Thyroid Stimulating Hormone (TSH) signaling pathway; Leptin signaling pathway; Prolactin Signaling Pathway; IL-7 Signaling Pathway; Type III interferon signaling; IL-9 Signaling Pathway; AGE/RAGE pathway; Allograft Rejection; Interleukin-11 Signalin…	Osteoclast differentiation; Influenza A; Measles; AGE-RAGE signaling pathway in diabetic complications; Pancreatic cancer; Inflammatory bowel disease (IBD); Hepatitis C; Toxoplasmosis; Pathways in cancer; Toll-like receptor signaling pathway; Prolactin signaling pathway; Jak-STAT signaling pathway; Hepatitis B; Tuberculosis; NOD-like receptor signaling pathway; Chemokine signaling pathway; Thyroi…	Regulation of RUNX2 expression and activity; ISG15 antiviral mechanism; Interleukin-35 Signalling; Downstream signal transduction; Regulation of IFNA signaling; Regulation of IFNG signaling; Signaling by cytosolic FGFR1 fusion mutants; Signaling by SCF-KIT; Interleukin-6 family signaling; Interleukin-4 and 13 signaling; Growth hormone receptor signaling	26.079	26.737	-0.658	0	0	FDR <= 0.01	26.9615	26.737	0.2245	0.0004	0.0014	FDR <= 0.01
5275	O94973	O94973;O94973-2;A0A0G2JS82;O94973-3;A0A0G2JQM1;E9PR62;A0A0G2JRF9;A0A0G2JQA4;A0A0G2JRS3;E9PNC4;H0YEG0;A0A0G2JQT9;H0YDE9;A0A0G2JS17;E9PQP4	AP-2 complex subunit alpha-2 OS=Homo sapiens OX=9606 GN=AP2A2 PE=1 SV=2	38	24	306	cell organization and biogenesis;cellular component movement;metabolic process;regulation of biological process;response to stimulus;transport	cytosol;membrane	protein binding;transporter activity	AP2A2	Synaptic Vesicle Pathway	Endocytosis; Endocrine and other factor-regulated calcium reabsorption; Synaptic vesicle cycle; Huntington's disease	Cargo recognition for clathrin-mediated endocytosis; Nef Mediated CD8 Down-regulation; Nef Mediated CD4 Down-regulation; Recycling pathway of L1; LDL clearance; EPH-ephrin mediated repulsion of cells; Neutrophil degranulation; Retrograde neurotrophin signalling; VLDLR internalisation and degradation; WNT5A-dependent internalization of FZD2, FZD5 and ROR2; MHC class II antigen presentation; WNT5A-…	23.8177	23.7684	0.0493	0.2793	0.3777	FDR > 0.05	23.9406	23.7684	0.1722	0.0037	0.0083	FDR <= 0.01
2990	O94911	O94911;A0A0A0MSU4;O94911-3;A0A075B774;Q8WWZ4-2;E5RFN6;Q8WWZ4	ATP-binding cassette sub-family A member 8 OS=Homo sapiens OX=9606 GN=ABCA8 PE=1 SV=3	4	4	15	transport	membrane	catalytic activity;nucleotide binding;transporter activity	ABCA8		ABC transporters	ABC-family proteins mediated transport	18.1979	18.8551	-0.6572	0.0004	0.0019	FDR <= 0.01	17.7243	18.8551	-1.1308	0	0.0001	FDR <= 0.01											1.5334	0.0608	0.7654	-0.162	1.2018	-0.2582	-0.6592	-1.2997	-1.1825	7
4496	Q9Y2G5	Q9Y2G5;Q9Y2G5-1;Q9Y2G5-2;S6FW71;H7C2T5;A0A0C4DGX7	GDP-fucose protein O-fucosyltransferase 2 OS=Homo sapiens OX=9606 GN=POFUT2 PE=1 SV=3	16	16	124	metabolic process;regulation of biological process	endoplasmic reticulum;Golgi;membrane	catalytic activity	POFUT2		Other types of O-glycan biosynthesis	O-glycosylation of TSR domain-containing proteins	23.3503	24.0074	-0.6571	0	0	FDR <= 0.01	23.5833	24.0074	-0.424	0	0	FDR <= 0.01
699	O60662	O60662-2;O60662	Kelch-like protein 41 OS=Homo sapiens OX=9606 GN=KLHL41 PE=1 SV=2	5	3	17	cell differentiation;cell organization and biogenesis;metabolic process;regulation of biological process	cytoplasm;cytoskeleton;cytosol;endoplasmic reticulum;membrane;nucleus	catalytic activity;protein binding	KBTBD10; KLHL41			Antigen processing: Ubiquitination & Proteasome degradation; Neddylation	19.1115	19.7658	-0.6543	0	0	FDR <= 0.01	18.4361	19.7658	-1.3297	0	0	FDR <= 0.01											1.0472	0.0913	1.2681	0.1009	1.1087	-0.1559	-1.0309	-1.282	-1.1476	6
826	Q9H7D0	Q9H7D0;H0Y7N4;Q9H7D0-2;H0YB14	Dedicator of cytokinesis protein 5 OS=Homo sapiens OX=9606 GN=DOCK5 PE=1 SV=3	51	47	306	regulation of biological process;response to stimulus	cytoplasm;cytosol;membrane	protein binding	DOCK5			Factors involved in megakaryocyte development and platelet production	24.3799	24.4428	-0.0629	0.0369	0.0727	FDR > 0.05	24.0234	24.4428	-0.4194	0	0	FDR <= 0.01
2275	H0YIC4	H0YIC4	Citrate synthase (Fragment) OS=Homo sapiens OX=9606 GN=CS PE=1 SV=1	5	1	104	metabolic process	membrane	catalytic activity		TCA Cycle and Deficiency of Pyruvate Dehydrogenase complex (PDHc); Amino Acid metabolism			20.6619	21.3146	-0.6527	0	0.0001	FDR <= 0.01	21.011	21.3146	-0.3036	0.001	0.0028	FDR <= 0.01
5801	Q16678	Q16678;A0A087WW26;A0A087WUQ7	Cytochrome P450 1B1 OS=Homo sapiens OX=9606 GN=CYP1B1 PE=1 SV=2	17	17	133	cell organization and biogenesis;cellular component movement;metabolic process;regulation of biological process;response to stimulus	endoplasmic reticulum;membrane;mitochondrion	catalytic activity;metal ion binding	CYP1B1	Sulindac Metabolic Pathway; Aryl Hydrocarbon Receptor; Aryl Hydrocarbon Receptor Pathway; Estrogen Receptor Pathway; Melatonin metabolism and effects; Oxidation by Cytochrome P450; Tryptophan metabolism; Tamoxifen metabolism; Benzo(a)pyrene metabolism; Estrogen metabolism; Metapathway biotransformation	Tryptophan metabolism; Ovarian steroidogenesis; Metabolism of xenobiotics by cytochrome P450; Steroid hormone biosynthesis; Chemical carcinogenesis; MicroRNAs in cancer	Synthesis of epoxy (EET) and dihydroxyeicosatrienoic acids (DHET); Endogenous sterols; Defective CYP1B1 causes Glaucoma; Synthesis of (16-20)-hydroxyeicosatetraenoic acids (HETE)	22.5511	23.2025	-0.6514	0	0	FDR <= 0.01	22.8942	23.2025	-0.3083	0	0	FDR <= 0.01
5759	P30622	P30622;P30622-1;P30622-2;J3KP58;F5H0N7;F5H6A0;A0A3B3ITA2;F5H1T5;A0A3B3ISJ8;F5H270;A0A3B3IS27	CAP-Gly domain-containing linker protein 1 OS=Homo sapiens OX=9606 GN=CLIP1 PE=1 SV=2	51	45	303	cell differentiation;cell organization and biogenesis;metabolic process;regulation of biological process;transport	chromosome;cytoplasm;cytoskeleton;cytosol;endosome;membrane	catalytic activity;metal ion binding;motor activity;protein binding	CLIP1	Regulation of Microtubule Cytoskeleton	mTOR signaling pathway	Amplification of signal from unattached kinetochores via a MAD2 inhibitory signal; Separation of Sister Chromatids; Resolution of Sister Chromatid Cohesion; RHO GTPases Activate Formins; RHO GTPases activate IQGAPs	24.9076	24.852	0.0556	0.041	0.0792	FDR > 0.05	25.3639	24.852	0.5119	0	0	FDR <= 0.01
7216	O75083	O75083;O75083-3;D6RD66	WD repeat-containing protein 1 OS=Homo sapiens OX=9606 GN=WDR1 PE=1 SV=4	28	28	448	cell differentiation;cell organization and biogenesis;cellular component movement;metabolic process;regulation of biological process;transport	cytoplasm;cytoskeleton;cytosol;extracellular	protein binding	WDR1	Hypertrophy Model		Platelet degranulation	27.343	27.3131	0.03	0.2735	0.3718	FDR > 0.05	27.206	27.3131	-0.1071	0.003	0.007	FDR <= 0.01
4906	Q12906-7	Q12906-7;Q12906;Q12906-4;Q12906-6;Q12906-3;Q12906-2;Q12906-5;K7EKJ9;K7ER69;K7EKY0;K7EJ09;K7EM82;K7EQR9;K7ENK6;K7ERM6;K7EPG3	Isoform 7 of Interleukin enhancer-binding factor 3 OS=Homo sapiens OX=9606 GN=ILF3	31	25	415	defense response;metabolic process;regulation of biological process;response to stimulus	cytoplasm;extracellular;membrane;mitochondrion;nucleus	DNA binding;protein binding;RNA binding	ILF3				26.2682	26.2071	0.0611	0.1115	0.1806	FDR > 0.05	26.0406	26.2071	-0.1666	0.0012	0.0033	FDR <= 0.01
434	Q86VP6	Q86VP6;Q86VP6-2;A0A0C4DGH5;H0YH27;Q86VP6-3;F5H6I6	Cullin-associated NEDD8-dissociated protein 1 OS=Homo sapiens OX=9606 GN=CAND1 PE=1 SV=2	49	45	559	cell differentiation;cell organization and biogenesis;cellular homeostasis;metabolic process;regulation of biological process;transport	cytoplasm;cytosol;extracellular;Golgi;membrane;nucleus;organelle lumen	protein binding	CAND1	Endoderm Differentiation		Neutrophil degranulation; Iron uptake and transport; Neddylation	26.9036	26.9031	0.0005	0.9845	0.9897	FDR > 0.05	26.8069	26.9031	-0.0962	0.0066	0.0137	FDR <= 0.05
7620	Q13642-5	Q13642-5;Q13642-4;Q13642-1;Q5JXI8	Isoform 5 of Four and a half LIM domains protein 1 OS=Homo sapiens OX=9606 GN=FHL1	20	6	252	cell differentiation;regulation of biological process	cytoplasm;cytosol;membrane;nucleus	metal ion binding;protein binding	FHL1	Notch Signaling Pathway			25.1962	25.8468	-0.6506	0	0.0001	FDR <= 0.01	25.8049	25.8468	-0.042	0.5125	0.579	FDR > 0.05
227	E9PIN5	E9PIN5;E9PKZ4;E9PKN9;E9PMW4;U3KQ32;O14683;E9PS55;E9PPM1;E9PIK4;E9PN66;E9PQ46;E9PMY0;E9PNB3	Tumor protein p53-inducible protein 11 (Fragment) OS=Homo sapiens OX=9606 GN=TP53I11 PE=1 SV=1	3	3	15		membrane						19.8892	20.5322	-0.643	0	0	FDR <= 0.01	21.4831	20.5322	0.9509	0	0	FDR <= 0.01
2820	Q16890	Q16890;Q16890-5;J3KNE7;E9PPQ1;E9PNK6;Q16890-4;Q16890-2;Q16890-3;E9PNQ9	Tumor protein D53 OS=Homo sapiens OX=9606 GN=TPD52L1 PE=1 SV=1	8	8	42	regulation of biological process	cytoplasm	protein binding	TPD52L1			Golgi Associated Vesicle Biogenesis	21.5205	22.1573	-0.6368	0	0	FDR <= 0.01	19.7498	22.1573	-2.4075	0	0	FDR <= 0.01											0.9149	0.3285	0.9216	0.3548	0.9806	0.3658	-1.2699	-1.3228	-1.2736	6
5116	O94925	O94925;B7Z509;C9JIJ6;H7C201	Glutaminase kidney isoform, mitochondrial OS=Homo sapiens OX=9606 GN=GLS PE=1 SV=1	21	5	173	cell communication;cell organization and biogenesis;metabolic process;regulation of biological process;response to stimulus;transport	cytoplasm;cytosol;mitochondrion;organelle lumen	catalytic activity;protein binding	GLS	Amino Acid metabolism	MicroRNAs in cancer; Alanine, aspartate and glutamate metabolism; Glutamatergic synapse; D-Glutamine and D-glutamate metabolism; GABAergic synapse; Proximal tubule bicarbonate reclamation; Central carbon metabolism in cancer; Arginine biosynthesis; Metabolic pathways	Amino acid synthesis and interconversion (transamination); TP53 Regulates Metabolic Genes; Glutamate Neurotransmitter Release Cycle	23.5359	24.1723	-0.6364	0	0	FDR <= 0.01	23.8415	24.1723	-0.3307	0	0.0001	FDR <= 0.01
4950	Q9UBG0	Q9UBG0;E7EME3;J3KRF1	C-type mannose receptor 2 OS=Homo sapiens OX=9606 GN=MRC2 PE=1 SV=2	35	35	329	cell differentiation;metabolic process;regulation of biological process;response to stimulus;transport	membrane	protein binding;receptor activity;signal transducer activity	MRC2		Phagosome; Tuberculosis	Cross-presentation of soluble exogenous antigens (endosomes)	24.1053	24.7414	-0.636	0	0	FDR <= 0.01	24.553	24.7414	-0.1884	0.0002	0.0007	FDR <= 0.01
5087	P51587	P51587	Breast cancer type 2 susceptibility protein OS=Homo sapiens OX=9606 GN=BRCA2 PE=1 SV=3	2	2	5	cell organization and biogenesis;cell proliferation;metabolic process;regulation of biological process;response to stimulus	cytoplasm;cytoskeleton;cytosol;nucleus	catalytic activity;DNA binding;protein binding	BRCA2		Homologous recombination; Fanconi anemia pathway; Pathways in cancer; Breast cancer; Pancreatic cancer	Meiotic recombination; Presynaptic phase of homologous DNA pairing and strand exchange; Resolution of D-loop Structures through Holliday Junction Intermediates; Resolution of D-loop Structures through Synthesis-Dependent Strand Annealing (SDSA)	19.3176	19.9522	-0.6346	0	0	FDR <= 0.01	20.1847	19.9522	0.2325	0.0029	0.0069	FDR <= 0.01
5961	O95425-4	O95425-4;O95425-2	Isoform SV4 of Supervillin OS=Homo sapiens OX=9606 GN=SVIL	86	1	662	cell organization and biogenesis;regulation of biological process	cytoplasm;cytoskeleton;cytosol;membrane;nucleus	protein binding	SVIL				18.8345	19.4677	-0.6332	0.0031	0.0093	FDR <= 0.01	17.8735	19.4677	-1.5942	0	0	FDR <= 0.01											1.1293	0.3765	1.2195	0.4099	0.7492	-0.3306	-1.0393	-1.1701	-1.3445	6
5933	P62736	P62736;P63267;P63267-2;F6UVQ4;C9JFL5	Actin, aortic smooth muscle OS=Homo sapiens OX=9606 GN=ACTA2 PE=1 SV=1	23	9	1971	regulation of biological process;response to stimulus	cytoplasm;cytoskeleton;cytosol	nucleotide binding;protein binding	ACTA2	Myometrial Relaxation and Contraction Pathways; Striated Muscle Contraction	Vascular smooth muscle contraction	Smooth Muscle Contraction	27.3951	27.2474	0.1477	0.0043	0.0121	FDR <= 0.05	27.6127	27.2474	0.3653	0	0.0001	FDR <= 0.01
3840	P42345	P42345;B1AKP8;B1AKQ2	Serine/threonine-protein kinase mTOR OS=Homo sapiens OX=9606 GN=MTOR PE=1 SV=1	52	51	297	cell communication;cell death;cell organization and biogenesis;metabolic process;regulation of biological process;response to stimulus	cytoplasm;cytosol;endoplasmic reticulum;Golgi;membrane;mitochondrion;nucleus;vacuole	catalytic activity;DNA binding;nucleotide binding;protein binding	MTOR	AMP-activated Protein Kinase (AMPK) Signaling; Target Of Rapamycin (TOR) Signaling; MicroRNAs in cardiomyocyte hypertrophy; Type II diabetes mellitus; Sterol Regulatory Element-Binding Proteins (SREBP) signalling; Integrated Breast Cancer Pathway; SREBF and miR33 in cholesterol and lipid homeostasis; RANKL/RANK (Receptor activator of NFKB (ligand)) Signaling Pathway; Human Thyroid Stimulating Hor…	Breast cancer; Longevity regulating pathway; HIF-1 signaling pathway; AMPK signaling pathway; EGFR tyrosine kinase inhibitor resistance; ErbB signaling pathway; Phospholipase D signaling pathway; Insulin resistance; Longevity regulating pathway - multiple species; Proteoglycans in cancer; Thyroid hormone signaling pathway; Central carbon metabolism in cancer; mTOR signaling pathway; Pathways in c…	HSF1-dependent transactivation; Regulation of TP53 Degradation; mTORC1-mediated signalling; Constitutive Signaling by AKT1 E17K in Cancer; Energy dependent regulation of mTOR by LKB1-AMPK; CD28 dependent PI3K/Akt signaling; Regulation of PTEN gene transcription; VEGFR2 mediated vascular permeability; TP53 Regulates Metabolic Genes; Macroautophagy	23.7967	23.8315	-0.0348	0.2694	0.3672	FDR > 0.05	23.7703	23.8315	-0.0612	0.0702	0.1061	FDR > 0.05
5200	Q9NWM8	Q9NWM8;H7C1Z9	Peptidyl-prolyl cis-trans isomerase FKBP14 OS=Homo sapiens OX=9606 GN=FKBP14 PE=1 SV=1	9	9	72	metabolic process	cytoplasm;endoplasmic reticulum;organelle lumen	catalytic activity;metal ion binding	FKBP14			XBP1(S) activates chaperone genes	21.5755	22.207	-0.6315	0	0	FDR <= 0.01	21.3904	22.207	-0.8166	0	0	FDR <= 0.01
8091	P04040	P04040	Catalase OS=Homo sapiens OX=9606 GN=CAT PE=1 SV=3	23	23	191	cell differentiation;cell organization and biogenesis;metabolic process;regulation of biological process;response to stimulus;transport	cytosol;endoplasmic reticulum;extracellular;Golgi;membrane;mitochondrion;organelle lumen;vacuole	antioxidant activity;catalytic activity;metal ion binding;nucleotide binding;protein binding	CAT	Selenium Micronutrient Network; Folate Metabolism; Amyotrophic lateral sclerosis (ALS); Oxidative Stress; Tryptophan metabolism; DNA Damage Response (only ATM dependent)	Glyoxylate and dicarboxylate metabolism; Longevity regulating pathway - multiple species; FoxO signaling pathway; Tryptophan metabolism; Amyotrophic lateral sclerosis (ALS); Carbon metabolism; Peroxisome; Longevity regulating pathway	Neutrophil degranulation; Detoxification of Reactive Oxygen Species	23.8751	24.5023	-0.6272	0	0	FDR <= 0.01	24.43	24.5023	-0.0723	0.0236	0.0412	FDR <= 0.05
8312	P68366	P68366;P68366-2;C9JDS9;C9JEV8;C9JQ00;C9JJQ8;C9JDL2	Tubulin alpha-4A chain OS=Homo sapiens OX=9606 GN=TUBA4A PE=1 SV=1	22	4	1647	cell organization and biogenesis;regulation of biological process;transport	cytoplasm;cytoskeleton;cytosol;extracellular	catalytic activity;nucleotide binding;protein binding;structural molecule activity	TUBA4A	Pathogenic Escherichia coli infection; Parkin-Ubiquitin Proteasomal System pathway	Phagosome; Pathogenic Escherichia coli infection; Apoptosis; Gap junction	COPI-independent Golgi-to-ER retrograde traffic; COPI-dependent Golgi-to-ER retrograde traffic; Carboxyterminal post-translational modifications of tubulin; Regulation of PLK1 Activity at G2/M Transition; Recruitment of NuMA to mitotic centrosomes; Hedgehog 'off' state; Loss of Nlp from mitotic centrosomes; Translocation of GLUT4 to the plasma membrane; Prefoldin mediated transfer of substrate to…	26.8893	26.7955	0.0939	0.1418	0.2193	FDR > 0.05	26.7117	26.7955	-0.0837	0.184	0.2442	FDR > 0.05
7432	P56199	P56199;A0A494C0F7	Integrin alpha-1 OS=Homo sapiens OX=9606 GN=ITGA1 PE=1 SV=2	21	19	108	cell organization and biogenesis;cellular component movement;regulation of biological process;response to stimulus	cell surface;membrane	metal ion binding;protein binding	ITGA1	Integrin-mediated Cell Adhesion; Arrhythmogenic Right Ventricular Cardiomyopathy; miRNA targets in ECM and membrane receptors; Signaling of Hepatocyte Growth Factor Receptor; NOTCH1 regulation of human endothelial cell calcification; Regulation of Actin Cytoskeleton	PI3K-Akt signaling pathway; Hematopoietic cell lineage; Regulation of actin cytoskeleton; Arrhythmogenic right ventricular cardiomyopathy (ARVC); Hypertrophic cardiomyopathy (HCM); ECM-receptor interaction; Focal adhesion; Dilated cardiomyopathy	CHL1 interactions; Other semaphorin interactions; Integrin cell surface interactions; Smooth Muscle Contraction; Laminin interactions; Platelet Adhesion to exposed collagen	21.9014	22.5282	-0.6268	0	0	FDR <= 0.01	21.9788	22.5282	-0.5494	0	0	FDR <= 0.01
2571	P15289	P15289;P15289-2;A0A0C4DFZ2	Arylsulfatase A OS=Homo sapiens OX=9606 GN=ARSA PE=1 SV=3	9	9	101	metabolic process;transport	extracellular;organelle lumen;vacuole	catalytic activity;metal ion binding;protein binding	ARSA		Lysosome; Sphingolipid metabolism	The activation of arylsulfatases; Glycosphingolipid metabolism; Neutrophil degranulation	22.0764	22.6989	-0.6225	0	0	FDR <= 0.01	21.6676	22.6989	-1.0313	0	0	FDR <= 0.01											1.1882	-0.1554	1.241	-0.1429	1.2457	-0.1765	-1.124	-1.0088	-1.0674	7
4723	P24593	P24593;C9JXX4	Insulin-like growth factor-binding protein 5 OS=Homo sapiens OX=9606 GN=IGFBP5 PE=1 SV=1	4	4	25	cell differentiation;cell proliferation;metabolic process;regulation of biological process;response to stimulus	extracellular;organelle lumen	protein binding	IGFBP5	Myometrial Relaxation and Contraction Pathways; Factors and pathways affecting insulin-like growth factor (IGF1)-Akt signaling; Senescence and Autophagy in Cancer		Post-translational protein phosphorylation; Regulation of Insulin-like Growth Factor (IGF) transport and uptake by Insulin-like Growth Factor Binding Proteins (IGFBPs)	19.3467	19.9691	-0.6224	0	0.0001	FDR <= 0.01	18.5295	19.9691	-1.4395	0	0	FDR <= 0.01											1.0061	0.2884	1.0517	0.0418	1.2197	-0.0206	-1.3051	-1.1162	-1.1659	6	Core matrisome	ECM Glycoproteins
7564	P49368	P49368;B4DUR8;P49368-2;Q5SZX6;E9PRC8;Q5SZW8;E9PQ35;Q5SZX9;E9PM09	T-complex protein 1 subunit gamma OS=Homo sapiens OX=9606 GN=CCT3 PE=1 SV=4	32	32	453	cell organization and biogenesis;metabolic process;regulation of biological process;transport	cytoplasm;cytoskeleton;cytosol;membrane	nucleotide binding;protein binding;RNA binding	CCT3			BBSome-mediated cargo-targeting to cilium; Prefoldin mediated transfer of substrate to CCT/TriC; Cooperation of PDCL (PhLP1) and TRiC/CCT in G-protein beta folding; Association of TriC/CCT with target proteins during biosynthesis; Formation of tubulin folding intermediates by CCT/TriC; Folding of actin by CCT/TriC	26.2079	26.1355	0.0724	0.0772	0.1341	FDR > 0.05	26.1985	26.1355	0.063	0.1158	0.1635	FDR > 0.05
5286	P49748	P49748-3;P49748;P49748-2;G3V1M7;J3QRJ8;K7EQP4;K7EJW8;J3QKU9;J3KSR4;J3KS89	Very long-chain specific acyl-CoA dehydrogenase, mitochondrial OS=Homo sapiens OX=9606 GN=ACADVL PE=1 SV=1	30	30	371	cell differentiation;metabolic process;regulation of biological process;response to stimulus	cytosol;membrane;mitochondrion;nucleus;organelle lumen	catalytic activity;nucleotide binding	ACADVL	Fatty Acid Beta Oxidation; Mitochondrial LC-Fatty Acid Beta-Oxidation	Fatty acid metabolism; Fatty acid degradation; Metabolic pathways	Beta oxidation of palmitoyl-CoA to myristoyl-CoA; XBP1(S) activates chaperone genes	25.7558	26.3711	-0.6153	0	0	FDR <= 0.01	25.7337	26.3711	-0.6375	0	0	FDR <= 0.01
7092	Q9UK22	Q9UK22;A0A286YF37;R4GNH2	F-box only protein 2 OS=Homo sapiens OX=9606 GN=FBXO2 PE=1 SV=2	3	3	18	metabolic process;regulation of biological process	cytoplasm;cytosol;endoplasmic reticulum;membrane	catalytic activity;protein binding	FBXO2		Ubiquitin mediated proteolysis; Protein processing in endoplasmic reticulum	Antigen processing: Ubiquitination & Proteasome degradation; Neddylation	18.466	19.0803	-0.6143	0	0.0002	FDR <= 0.01	18.5956	19.0803	-0.4847	0.0002	0.0006	FDR <= 0.01
6552	P84101	P84101;P84101-4;F8WBN3;P84101-2;B9A031;B8ZZY7;F8WBV6;P84101-3;C9JQZ0	Small EDRK-rich factor 2 OS=Homo sapiens OX=9606 GN=SERF2 PE=1 SV=1	3	3	25		cytosol;nucleus		SERF2				21.1398	21.7515	-0.6117	0	0	FDR <= 0.01	21.4994	21.7515	-0.252	0.0001	0.0003	FDR <= 0.01
8074	Q9UBR2	Q9UBR2	Cathepsin Z OS=Homo sapiens OX=9606 GN=CTSZ PE=1 SV=1	9	9	67	cell organization and biogenesis;metabolic process;regulation of biological process;transport	cell surface;endoplasmic reticulum;extracellular;membrane;organelle lumen;vacuole	catalytic activity;protein binding	CTSZ		Lysosome; Apoptosis	Metabolism of Angiotensinogen to Angiotensins; Neutrophil degranulation; Cargo concentration in the ER; COPII (Coat Protein 2) Mediated Vesicle Transport; Lysosome Vesicle Biogenesis	22.3014	22.9121	-0.6106	0	0.0002	FDR <= 0.01	22.555	22.9121	-0.357	0.001	0.0027	FDR <= 0.01																					Matrisome-associated	ECM Regulators
4837	P12235	P12235;V9GYG0	ADP/ATP translocase 1 OS=Homo sapiens OX=9606 GN=SLC25A4 PE=1 SV=4	14	4	253	cell organization and biogenesis;metabolic process;regulation of biological process;transport	membrane;mitochondrion;nucleus	protein binding;transporter activity	SLC25A4	Electron Transport Chain; Synaptic Vesicle Pathway; Sudden Infant Death Syndrome (SIDS) Susceptibility Pathways	Parkinson's disease; cGMP-PKG signaling pathway; HTLV-I infection; Calcium signaling pathway; Huntington's disease	Vpr-mediated induction of apoptosis by mitochondrial outer membrane permeabilization; Mitochondrial protein import; Metabolism of proteins; Regulation of insulin secretion	22.0484	22.6586	-0.6102	0	0	FDR <= 0.01	22.0872	22.6586	-0.5714	0	0	FDR <= 0.01
2321	Q9Y625	Q9Y625;A0A087WT82	Glypican-6 OS=Homo sapiens OX=9606 GN=GPC6 PE=1 SV=1	7	6	29	cellular component movement;metabolic process;regulation of biological process;response to stimulus	extracellular;membrane;nucleus;organelle lumen	protein binding	GPC6	miR-509-3p alteration of YAP1/ECM axis		Signaling by GPCR; HS-GAG biosynthesis; A tetrasaccharide linker sequence is required for GAG synthesis; Defective B4GALT7 causes EDS, progeroid type; Retinoid metabolism and transport; Defective B3GALT6 causes EDSP2 and SEMDJL1; HS-GAG degradation; Defective EXT2 causes exostoses 2; Defective B3GAT3 causes JDSSDHD; Defective EXT1 causes exostoses 1, TRPS2 and CHDS	20.8486	21.4556	-0.6071	0	0	FDR <= 0.01	21.6631	21.4556	0.2075	0.0001	0.0003	FDR <= 0.01																					Matrisome-associated	ECM-affiliated Proteins
790	P10600	P10600-2;P10600	Transforming growth factor beta-3 proprotein OS=Homo sapiens OX=9606 GN=TGFB3 PE=1 SV=1	2	2	6	cell growth;cell organization and biogenesis;regulation of biological process;response to stimulus;transport	cell surface;cytoplasm;extracellular;membrane;nucleus;organelle lumen	protein binding	TGFB3	Differentiation Pathway; Extracellular vesicle-mediated signaling in recipient cells; Photodynamic therapy-induced HIF-1 survival signaling; Hypothetical Craniofacial Development Pathway; MAPK Signaling Pathway	AGE-RAGE signaling pathway in diabetic complications; Pancreatic cancer; MAPK signaling pathway; Rheumatoid arthritis; Inflammatory bowel disease (IBD); Malaria; Chagas disease (American trypanosomiasis); Cytokine-cytokine receptor interaction; Tuberculosis; FoxO signaling pathway; Pathways in cancer; Amoebiasis; Hypertrophic cardiomyopathy (HCM); Endocytosis; Leishmaniasis; Toxoplasmosis; Chroni…	Platelet degranulation ; ECM proteoglycans; Molecules associated with elastic fibres	15.0758	15.6788	-0.603	0	0.0003	FDR <= 0.01	15.1667	15.6788	-0.5121	0.0001	0.0004	FDR <= 0.01																					Matrisome-associated	Secreted Factors
5014	A0A0A0MSQ0	A0A0A0MSQ0	Plastin-3 OS=Homo sapiens OX=9606 GN=PLS3 PE=1 SV=1	38	1	517			metal ion binding;protein binding					19.0504	18.68	0.3703	0.0736	0.1289	FDR > 0.05	19.1453	18.68	0.4653	0.0323	0.0544	FDR > 0.05
2069	A0A0A0MS88	Q6UXH8;A0A0A0MS88;A0A3B3IRL6;Q6UXH8-3	Collagen and calcium-binding EGF domain-containing protein 1 OS=Homo sapiens OX=9606 GN=CCBE1 PE=1 SV=1	4	4	28			metal ion binding					20.429	21.0297	-0.6007	0	0	FDR <= 0.01	20.6794	21.0297	-0.3504	0	0	FDR <= 0.01																					Matrisome-associated	Secreted Factors
4721	Q5VWG9	Q5VWG9	Transcription initiation factor TFIID subunit 3 OS=Homo sapiens OX=9606 GN=TAF3 PE=1 SV=1	2	2	8	metabolic process;regulation of biological process	membrane;nucleus	metal ion binding;protein binding	TAF3		Basal transcription factors; Herpes simplex infection	RNA Polymerase II Transcription Initiation; HIV Transcription Initiation; RNA Polymerase II Transcription Pre-Initiation And Promoter Opening; RNA Polymerase II HIV Promoter Escape; Regulation of TP53 Activity through Phosphorylation; RNA Polymerase II Pre-transcription Events; RNA Polymerase II Promoter Escape	15.6746	16.2746	-0.6	0.0022	0.007	FDR <= 0.01	15.8331	16.2746	-0.4415	0.0114	0.022	FDR <= 0.05
8104	Q9Y5S2	Q9Y5S2;H0YLY0;A0A0U1RRC3	Serine/threonine-protein kinase MRCK beta OS=Homo sapiens OX=9606 GN=CDC42BPB PE=1 SV=2	49	43	279	cell organization and biogenesis;cellular component movement;metabolic process;regulation of biological process;response to stimulus;transport	cytoplasm;cytoskeleton;extracellular;Golgi;membrane	catalytic activity;metal ion binding;motor activity;nucleotide binding;protein binding;structural molecule activity	CDC42BPB				24.3743	24.4666	-0.0923	0.0036	0.0105	FDR <= 0.05	24.6017	24.4666	0.1351	0.0003	0.0011	FDR <= 0.01
2812	O60716-3	O60716-3;O60716-5;O60716-2;C9JZR2;O60716;O60716-7;O60716-8;O60716-6;O60716-4;O60716-11;O60716-13;O60716-10;O60716-9;O60716-16;O60716-15;O60716-21;O60716-19;O60716-12;O60716-14;O60716-18;O60716-17;O60716-23;O60716-24;O60716-20;O60716-22;E9PKL1	Isoform 1AC of Catenin delta-1 OS=Homo sapiens OX=9606 GN=CTNND1	39	4	317	cell organization and biogenesis;metabolic process;regulation of biological process;response to stimulus	cytoplasm;cytosol;membrane;nucleus	protein binding	CTNND1	VEGFA-VEGFR2 Signaling Pathway; Wnt Signaling Pathway and Pluripotency			24.3848	24.32	0.0648	0.2406	0.3356	FDR > 0.05	24.212	24.32	-0.108	0.0676	0.1029	FDR > 0.05
1857	A0A0A0MSA7	A0A0A0MSA7	Eukaryotic translation initiation factor 4 gamma 3 OS=Homo sapiens OX=9606 GN=EIF4G3 PE=1 SV=1	48	1	300	metabolic process;regulation of biological process	cytosol	protein binding;RNA binding	EIF4G3	Translation Factors								NA						NA
1422	Q13617	Q13617-2;A0A0A0MTN0;Q13617;Q5T2B5;Q5T2B7	Cullin-2 OS=Homo sapiens OX=9606 GN=CUL2 PE=1 SV=2	37	37	268	metabolic process;regulation of biological process;response to stimulus	cytosol	catalytic activity;protein binding	CUL2		Renal cell carcinoma; HIF-1 signaling pathway; Pathways in cancer; Ubiquitin mediated proteolysis	Oxygen-dependent proline hydroxylation of Hypoxia-inducible Factor Alpha; Regulation of expression of SLITs and ROBOs; Antigen processing: Ubiquitination & Proteasome degradation; Neddylation	24.8531	24.7981	0.0549	0.1347	0.2104	FDR > 0.05	24.7439	24.7981	-0.0542	0.1393	0.1919	FDR > 0.05
2925	P49411	P49411;H3BNU3	Elongation factor Tu, mitochondrial OS=Homo sapiens OX=9606 GN=TUFM PE=1 SV=2	22	22	262	metabolic process;response to stimulus	membrane;mitochondrion	catalytic activity;nucleotide binding;protein binding;RNA binding	TUFM			Mitochondrial translation elongation	26.3974	26.9962	-0.5988	0	0	FDR <= 0.01	26.5709	26.9962	-0.4253	0	0	FDR <= 0.01
2215	Q5JPE7	Q5JPE7-2;Q5JPE7;Q5JPE7-3	Nodal modulator 2 OS=Homo sapiens OX=9606 GN=NOMO2 PE=1 SV=1	39	1	262	regulation of biological process	endoplasmic reticulum;membrane	protein binding	NOMO2				15.7908	15.7484	0.0425	0.7267	0.793	FDR > 0.05	15.6289	15.7484	-0.1195	0.3381	0.4088	FDR > 0.05
7466	P17050	P17050	Alpha-N-acetylgalactosaminidase OS=Homo sapiens OX=9606 GN=NAGA PE=1 SV=2	8	8	73	metabolic process	cytoplasm;vacuole	catalytic activity;protein binding	NAGA		Glycosphingolipid biosynthesis - globo and isoglobo series; Lysosome		21.5486	22.1472	-0.5986	0	0	FDR <= 0.01	21.6917	22.1472	-0.4555	0	0	FDR <= 0.01
784	Q96DZ1	Q96DZ1;Q96DZ1-3;Q96DZ1-2	Endoplasmic reticulum lectin 1 OS=Homo sapiens OX=9606 GN=ERLEC1 PE=1 SV=1	22	22	159	metabolic process;transport	endoplasmic reticulum;organelle lumen	protein binding	ERLEC1		Protein processing in endoplasmic reticulum	Hh mutants that don't undergo autocatalytic processing are degraded by ERAD; ABC-family proteins mediated transport; Defective CFTR causes cystic fibrosis; Hedgehog ligand biogenesis	23.4424	24.04	-0.5975	0	0	FDR <= 0.01	23.6229	24.04	-0.4171	0	0	FDR <= 0.01
326	E7EX73	Q04637-3;Q04637-5;Q04637;E7EUU4;Q04637-9;E9PGM1;E7EX73;Q04637-8;Q04637-4;Q04637-7;Q04637-6;C9JF13;C9J6B6;H7C044;H7C0V6	Eukaryotic translation initiation factor 4 gamma 1 OS=Homo sapiens OX=9606 GN=EIF4G1 PE=1 SV=1	46	22	388	cell organization and biogenesis;defense response;metabolic process;regulation of biological process;response to stimulus	cytoplasm;cytosol;membrane;nucleus	nucleotide binding;protein binding;RNA binding;structural molecule activity	EIF4G1	Translation Factors			26.1397	26.1608	-0.0212	0.3734	0.4756	FDR > 0.05	26.1472	26.1608	-0.0136	0.5615	0.6252	FDR > 0.05
5006	O60841	A0A087WUT6;O60841	Eukaryotic translation initiation factor 5B OS=Homo sapiens OX=9606 GN=EIF5B PE=1 SV=4	50	50	351	metabolic process;regulation of biological process	cytoplasm;cytosol;nucleus	catalytic activity;metal ion binding;nucleotide binding;protein binding;RNA binding	EIF5B	Translation Factors	RNA transport	GTP hydrolysis and joining of the 60S ribosomal subunit	25.7045	25.6867	0.0177	0.5327	0.6303	FDR > 0.05	25.7055	25.6867	0.0188	0.51	0.5769	FDR > 0.05
2845	P04264	P04264	Keratin, type II cytoskeletal 1 OS=Homo sapiens OX=9606 GN=KRT1 PE=1 SV=6	39	30	305	cell death;defense response;metabolic process;regulation of biological process;response to stimulus;transport	cytoskeleton;cytosol;extracellular;membrane;nucleus	catalytic activity;motor activity;protein binding;receptor activity;structural molecule activity	KRT1	Corticotropin-releasing hormone signaling pathway		Formation of the cornified envelope; Neutrophil degranulation	26.3916	26.6553	-0.2637	0.6348	0.7174	FDR > 0.05	26.535	26.6553	-0.1203	0.8275	0.8598	FDR > 0.05
2845	P04264	P04264	SWISS-PROT:P04264 Tax_Id=9606 Gene_Symbol=KRT1 Keratin, type II cytoskeletal 1	37	28	268	cell death;defense response;metabolic process;regulation of biological process;response to stimulus;transport	cytoskeleton;cytosol;extracellular;membrane;nucleus	catalytic activity;motor activity;protein binding;receptor activity;structural molecule activity;transporter activity	KRT1	Corticotropin-releasing hormone signaling pathway			26.3916	26.6553	-0.2637	0.6348	0.7174	FDR > 0.05	26.535	26.6553	-0.1203	0.8275	0.8598	FDR > 0.05
2332	Q9P0M6	Q9P0M6;Q5SQT3	Core histone macro-H2A.2 OS=Homo sapiens OX=9606 GN=H2AFY2 PE=1 SV=3	11	10	76	cell organization and biogenesis;regulation of biological process	chromosome;nucleus	DNA binding;protein binding	H2AFY2	Preimplantation Embryo	Systemic lupus erythematosus; Alcoholism		21.6672	22.2622	-0.595	0	0	FDR <= 0.01	22.1443	22.2622	-0.1179	0.0079	0.0161	FDR <= 0.05
383	A0A182DWF2	A0A182DWF3;Q9NNW7-2;Q9NNW7;A0A182DWF2;D3YTF8;A0A096LPK7;E7EWK1;A0A096LPD9;Q9NNW7-3;Q9NNW7-4;A0A0U1RQX0;A0A096LNY7;A0A096LPH4;A0A096LP96;A0A096LPB7	Thioredoxin reductase 2, mitochondrial OS=Homo sapiens OX=9606 GN=TXNRD2 PE=1 SV=1	11	10	75	cellular homeostasis;metabolic process;regulation of biological process		antioxidant activity;catalytic activity;nucleotide binding					21.4898	22.0842	-0.5944	0	0	FDR <= 0.01	21.6512	22.0842	-0.4329	0	0	FDR <= 0.01
5779	P27487	P27487;F8WBB6	Dipeptidyl peptidase 4 OS=Homo sapiens OX=9606 GN=DPP4 PE=1 SV=2	31	27	420	cellular component movement;defense response;metabolic process;regulation of biological process;response to stimulus	cell surface;extracellular;membrane	catalytic activity;protein binding;receptor activity	DPP4		Protein digestion and absorption	Synthesis, secretion, and inactivation of Glucagon-like Peptide-1 (GLP-1); Synthesis, secretion, and inactivation of Glucose-dependent Insulinotropic Polypeptide (GIP)	26.4629	26.4412	0.0217	0.5612	0.6535	FDR > 0.05	26.5004	26.4412	0.0592	0.1372	0.1894	FDR > 0.05
7728	O60701	O60701;O60701-2;O60701-3;E7ETF4;E7EV97;E7ER83;E7ER95;D6RHF4;E9PBD2	UDP-glucose 6-dehydrogenase OS=Homo sapiens OX=9606 GN=UGDH PE=1 SV=1	25	25	381	metabolic process	cytosol;nucleus	catalytic activity;nucleotide binding	UGDH	Glucuronidation	Pentose and glucuronate interconversions; Ascorbate and aldarate metabolism; Metabolic pathways; Amino sugar and nucleotide sugar metabolism	Formation of the active cofactor, UDP-glucuronate	26.0406	26.036	0.0045	0.8809	0.9123	FDR > 0.05	26.4026	26.036	0.3666	0	0	FDR <= 0.01
3057	O60271-9	O60271-9	Isoform 6 of C-Jun-amino-terminal kinase-interacting protein 4 OS=Homo sapiens OX=9606 GN=SPAG9	41	1	283	cell differentiation;cell organization and biogenesis;regulation of biological process;transport	cytoplasm;cytosol	protein binding;structural molecule activity	SPAG9									NA						NA
2222	P00966	P00966;Q5T6L6;Q5T6L5	Argininosuccinate synthase OS=Homo sapiens OX=9606 GN=ASS1 PE=1 SV=2	21	21	175	metabolic process;regulation of biological process;response to stimulus	cytoplasm;cytosol;mitochondrion	catalytic activity;nucleotide binding;protein binding;RNA binding	ASS1	Alanine and aspartate metabolism; Amino Acid metabolism; Urea cycle and metabolism of amino groups	Alanine, aspartate and glutamate metabolism; Metabolic pathways; Arginine biosynthesis; Biosynthesis of amino acids	Urea cycle	24.8566	25.4509	-0.5943	0	0	FDR <= 0.01	24.674	25.4509	-0.7769	0	0	FDR <= 0.01
4023	Q9HBH1	Q9HBH1	Peptide deformylase, mitochondrial OS=Homo sapiens OX=9606 GN=PDF PE=1 SV=1	3	3	10	metabolic process;regulation of biological process	mitochondrion	catalytic activity;metal ion binding	PDF				17.7035	18.2973	-0.5938	0	0	FDR <= 0.01	18.0842	18.2973	-0.2131	0.0039	0.0088	FDR <= 0.01
2165	P31150	P31150;G5E9U5	Rab GDP dissociation inhibitor alpha OS=Homo sapiens OX=9606 GN=GDI1 PE=1 SV=2	24	14	371	metabolic process;regulation of biological process;response to stimulus;transport	cytoplasm;cytosol;Golgi	catalytic activity;enzyme regulator activity;protein binding	GDI1	Integrated Breast Cancer Pathway		RAB GEFs exchange GTP for GDP on RABs; Rho GTPase cycle	24.6773	24.6786	-0.0013	0.9584	0.9695	FDR > 0.05	24.5156	24.6786	-0.163	0.0001	0.0005	FDR <= 0.01
7180	Q6P1X6	Q6P1X6;H0YF29;Q6P1X6-2;J3KNI2	UPF0598 protein C8orf82 OS=Homo sapiens OX=9606 GN=C8orf82 PE=1 SV=2	6	6	57				C8orf82				21.1293	21.7227	-0.5934	0	0	FDR <= 0.01	21.8259	21.7227	0.1032	0.0378	0.0621	FDR > 0.05
6508	P55265	P55265;P55265-4;P55265-5	Double-stranded RNA-specific adenosine deaminase OS=Homo sapiens OX=9606 GN=ADAR PE=1 SV=4	47	3	328	cell differentiation;cell organization and biogenesis;defense response;metabolic process;regulation of biological process;response to stimulus;transport	cytoplasm;membrane;nucleus;spliceosomal complex	catalytic activity;DNA binding;metal ion binding;protein binding;RNA binding	ADAR		Measles; Influenza A; Cytosolic DNA-sensing pathway	C6 deamination of adenosine; Interferon alpha/beta signaling; Formation of editosomes by ADAR proteins	25.1046	25.1249	-0.0203	0.3796	0.4818	FDR > 0.05	24.9504	25.1249	-0.1745	0	0.0002	FDR <= 0.01
4933	C9J406	C9J406	MICOS complex subunit MIC60 OS=Homo sapiens OX=9606 GN=IMMT PE=1 SV=1	41	2	397		membrane;mitochondrion						17.5419	17.8997	-0.3578	0.2094	0.3011	FDR > 0.05	17.4607	17.8997	-0.4389	0.1325	0.1838	FDR > 0.05
5865	P38117	P38117;P38117-2;M0QY67	Electron transfer flavoprotein subunit beta OS=Homo sapiens OX=9606 GN=ETFB PE=1 SV=3	14	14	192	metabolic process;transport	cytosol;mitochondrion;organelle lumen	protein binding	ETFB			Protein methylation; Respiratory electron transport	24.6192	25.2076	-0.5884	0	0.0001	FDR <= 0.01	24.8764	25.2076	-0.3312	0.0006	0.0017	FDR <= 0.01
7573	P46063	P46063;F8WD97;F8WA66;F5H2L2;F5H4P4;F5H3W0	ATP-dependent DNA helicase Q1 OS=Homo sapiens OX=9606 GN=RECQL PE=1 SV=3	33	33	411	metabolic process;response to stimulus	chromosome;cytoplasm;membrane;nucleus	catalytic activity;DNA binding;nucleotide binding;protein binding	RECQL				26.2035	26.1353	0.0682	0.0623	0.1121	FDR > 0.05	25.8604	26.1353	-0.2748	0	0.0001	FDR <= 0.01
5503	Q8WUJ3	Q8WUJ3;Q8WUJ3-2;H0YL56	Cell migration-inducing and hyaluronan-binding protein OS=Homo sapiens OX=9606 GN=CEMIP PE=1 SV=2	12	12	67	metabolic process;regulation of biological process	cytoplasm;endoplasmic reticulum;extracellular;membrane;nucleus	catalytic activity;protein binding	KIAA1199; CEMIP			Hyaluronan biosynthesis and export	20.1784	20.764	-0.5856	0	0	FDR <= 0.01	22.2513	20.764	1.4873	0	0	FDR <= 0.01											-0.4008	-0.9962	-0.2652	-0.9669	-0.3072	-0.9061	1.2292	1.3281	1.285	1
6634	Q14697-2	Q14697-2;Q14697;F5H6X6;E9PKU7;E9PNH1	Isoform 2 of Neutral alpha-glucosidase AB OS=Homo sapiens OX=9606 GN=GANAB	38	37	429	metabolic process	Golgi;membrane;organelle lumen	catalytic activity;RNA binding	GANAB				26.6365	26.9313	-0.2948	0.0036	0.0107	FDR <= 0.05	26.6469	26.9313	-0.2845	0.0044	0.0098	FDR <= 0.01
5731	Q6YN16	Q6YN16;Q6YN16-2	Hydroxysteroid dehydrogenase-like protein 2 OS=Homo sapiens OX=9606 GN=HSDL2 PE=1 SV=1	17	17	149	metabolic process	membrane;mitochondrion	catalytic activity	HSDL2				24.5255	25.108	-0.5825	0	0	FDR <= 0.01	24.5746	25.108	-0.5334	0	0	FDR <= 0.01
511	M0QZM1	M0QZM1	Heterogeneous nuclear ribonucleoprotein M (Fragment) OS=Homo sapiens OX=9606 GN=HNRNPM PE=1 SV=1	27	1	609	metabolic process		RNA binding					19.5245	19.6105	-0.086	0.1174	0.1881	FDR > 0.05	19.5019	19.6105	-0.1086	0.0576	0.0897	FDR > 0.05
6594	Q9BS26	Q9BS26	Endoplasmic reticulum resident protein 44 OS=Homo sapiens OX=9606 GN=ERP44 PE=1 SV=1	19	18	136	cellular homeostasis;metabolic process;regulation of biological process;response to stimulus;transport	cell surface;endoplasmic reticulum;extracellular;membrane;organelle lumen	catalytic activity;metal ion binding;protein binding	ERP44			Neutrophil degranulation	24.9756	25.5546	-0.579	0	0	FDR <= 0.01	25.207	25.5546	-0.3476	0	0	FDR <= 0.01
1859	Q13200	Q13200;Q13200-3;Q13200-2;H7C1H2;H7C2Q3;C9JPC0	26S proteasome non-ATPase regulatory subunit 2 OS=Homo sapiens OX=9606 GN=PSMD2 PE=1 SV=3	27	27	334	metabolic process;regulation of biological process;response to stimulus;transport	cytoplasm;cytosol;extracellular;membrane;nucleus;organelle lumen;proteasome	catalytic activity;enzyme regulator activity;nucleotide binding;protein binding	PSMD2	Proteasome Degradation; TNF alpha Signaling Pathway; Parkin-Ubiquitin Proteasomal System pathway	Epstein-Barr virus infection; Proteasome	Regulation of RAS by GAPs; CDT1 association with the CDC6:ORC:origin complex; Downstream TCR signaling; UCH proteinases; NIK-->noncanonical NF-kB signaling; Hh mutants that don't undergo autocatalytic processing are degraded by ERAD; SCF-beta-TrCP mediated degradation of Emi1; Neutrophil degranulation; Cross-presentation of soluble exogenous antigens (endosomes); Separation of Sister Chromatids; …	25.7251	25.7064	0.0187	0.5709	0.6618	FDR > 0.05	25.8112	25.7064	0.1048	0.0106	0.0207	FDR <= 0.05
3391	Q96N67	Q96N67-5;Q96N67-6;Q96N67;Q96N67-3;Q96N67-2;Q96N67-4;A0A1B0GWE0;Q96N67-7;A0A1B0GUE9;A0A1B0GVW2;A0A0C4DGY6;A0A0U1RQJ5;A0A0U1RRC1;A0A0U1RR97	Dedicator of cytokinesis protein 7 OS=Homo sapiens OX=9606 GN=DOCK7 PE=1 SV=4	54	48	349	cell differentiation;cell organization and biogenesis;development;regulation of biological process;response to stimulus		protein binding	DOCK7			MET activates RAP1 and RAC1; Factors involved in megakaryocyte development and platelet production	24.4871	24.5122	-0.0251	0.2739	0.3721	FDR > 0.05	24.5433	24.5122	0.0311	0.1831	0.2433	FDR > 0.05
3275	O14773	O14773;A0A2R8Y7U1;A0A2R8YD45;E7EV34;A0A2R8YE64;O14773-2;A0A2R8YGD1;A0A2R8Y7I4;A0A2R8YD72	Tripeptidyl-peptidase 1 OS=Homo sapiens OX=9606 GN=TPP1 PE=1 SV=2	9	9	48	cell differentiation;cell organization and biogenesis;metabolic process	mitochondrion;organelle lumen;vacuole	catalytic activity;metal ion binding;protein binding	TPP1		Lysosome	XBP1(S) activates chaperone genes	22.9948	23.5733	-0.5785	0	0	FDR <= 0.01	22.9068	23.5733	-0.6665	0	0	FDR <= 0.01
2475	P49915	P49915;P49915-2	GMP synthase [glutamine-hydrolyzing] OS=Homo sapiens OX=9606 GN=GMPS PE=1 SV=1	31	31	291	metabolic process	cytoplasm;cytosol	catalytic activity;nucleotide binding	GMPS		Drug metabolism - other enzymes; Metabolic pathways; Purine metabolism	Purine ribonucleoside monophosphate biosynthesis	24.2421	24.1717	0.0704	0.0353	0.0703	FDR > 0.05	24.0656	24.1717	-0.1061	0.0051	0.0111	FDR <= 0.05
303	P43304	P43304;P43304-2;F5GYK7;E7EM56	Glycerol-3-phosphate dehydrogenase, mitochondrial OS=Homo sapiens OX=9606 GN=GPD2 PE=1 SV=3	37	37	314	metabolic process;transport	membrane;mitochondrion	catalytic activity;metal ion binding	GPD2	Fatty Acid Beta Oxidation	Glycerophospholipid metabolism	Triglyceride catabolism; Synthesis of PA	24.8404	25.4187	-0.5783	0	0	FDR <= 0.01	24.7582	25.4187	-0.6605	0	0	FDR <= 0.01
840	O43182	O43182;O43182-4;O43182-5;O43182-2;H7BYE6;O43182-3;B4DN07	Rho GTPase-activating protein 6 OS=Homo sapiens OX=9606 GN=ARHGAP6 PE=1 SV=3	11	11	54	cell organization and biogenesis;regulation of biological process;response to stimulus	cytoplasm;cytoskeleton;cytosol	enzyme regulator activity;protein binding	ARHGAP6			Rho GTPase cycle	20.268	20.8461	-0.5781	0	0	FDR <= 0.01	21.6231	20.8461	0.777	0	0	FDR <= 0.01
7291	P00505	P00505;P00505-2	Aspartate aminotransferase, mitochondrial OS=Homo sapiens OX=9606 GN=GOT2 PE=1 SV=3	16	16	200	metabolic process;response to stimulus;transport	cell surface;membrane;mitochondrion;organelle lumen	catalytic activity;protein binding;RNA binding	GOT2	Alanine and aspartate metabolism; Amino Acid metabolism; Glycolysis and Gluconeogenesis	Arginine and proline metabolism; Biosynthesis of amino acids; Arginine biosynthesis; Metabolic pathways; Alanine, aspartate and glutamate metabolism; Fat digestion and absorption; Tyrosine metabolism; Cysteine and methionine metabolism; Phenylalanine, tyrosine and tryptophan biosynthesis; 2-Oxocarboxylic acid metabolism; Phenylalanine metabolism; Carbon metabolism	Gluconeogenesis; Amino acid synthesis and interconversion (transamination); Glyoxylate metabolism and glycine degradation	25.1522	25.7277	-0.5755	0	0	FDR <= 0.01	25.2353	25.7277	-0.4923	0	0	FDR <= 0.01
2940	J3QKL0	Q8WVB3;J3QKL0;Q8WVB3-2	Hexosaminidase D OS=Homo sapiens OX=9606 GN=HEXD PE=1 SV=1	2	2	7	metabolic process		catalytic activity	LOC254808				16.6961	17.2715	-0.5754	0	0.0003	FDR <= 0.01	17.7189	17.2715	0.4474	0.0003	0.001	FDR <= 0.01
270	P28838	P28838-2;P28838;H0Y9Q1;H0Y983	Cytosol aminopeptidase OS=Homo sapiens OX=9606 GN=LAP3 PE=1 SV=3	28	28	383	metabolic process	cytoplasm;cytosol;mitochondrion;nucleus	catalytic activity;metal ion binding	LAP3		Metabolic pathways; Arginine and proline metabolism; Glutathione metabolism		25.0327	25.1179	-0.0852	0.0802	0.1382	FDR > 0.05	25.2374	25.1179	0.1195	0.0229	0.0402	FDR <= 0.05
4063	Q9BUF5	Q9BUF5;K7ESM5;K7EL29;K7ES63;K7EQT3;K7EN98;K7EJ64;K7ERA8;K7EJZ4;K7EPE5;K7ESQ3;M0R1I1	Tubulin beta-6 chain OS=Homo sapiens OX=9606 GN=TUBB6 PE=1 SV=1	23	11	871	cell organization and biogenesis	cytoplasm;cytoskeleton;nucleus	catalytic activity;nucleotide binding;structural molecule activity	TUBB6	Pathogenic Escherichia coli infection; Parkin-Ubiquitin Proteasomal System pathway	Phagosome; Pathogenic Escherichia coli infection; Gap junction	COPI-independent Golgi-to-ER retrograde traffic; COPI-dependent Golgi-to-ER retrograde traffic; Carboxyterminal post-translational modifications of tubulin; Recruitment of NuMA to mitotic centrosomes; Hedgehog 'off' state; Translocation of GLUT4 to the plasma membrane; Prefoldin mediated transfer of substrate to CCT/TriC; Microtubule-dependent trafficking of connexons from Golgi to the plasma mem…	25.6681	25.5349	0.1332	0.0238	0.0509	FDR > 0.05	25.4189	25.5349	-0.116	0.0416	0.0676	FDR > 0.05
4749	P15259	P15259	Phosphoglycerate mutase 2 OS=Homo sapiens OX=9606 GN=PGAM2 PE=1 SV=3	7	2	154	metabolic process;regulation of biological process;response to stimulus	cytosol;nucleus	catalytic activity	PGAM2	Glycolysis and Gluconeogenesis	Glucagon signaling pathway; Biosynthesis of amino acids; Carbon metabolism; Metabolic pathways; Glycolysis / Gluconeogenesis; Glycine, serine and threonine metabolism; Central carbon metabolism in cancer	Gluconeogenesis; Glycolysis	15.8926	16.4678	-0.5752	0.0003	0.0012	FDR <= 0.01	14.8324	16.4678	-1.6355	0	0	FDR <= 0.01											1.083	0.1484	1.0092	0.2512	0.9489	0.2677	-1.2557	-0.9376	-1.5151	6
5559	Q8IVL6	Q8IVL6;Q8IVL6-2	Prolyl 3-hydroxylase 3 OS=Homo sapiens OX=9606 GN=P3H3 PE=1 SV=1	17	17	135	metabolic process;regulation of biological process	endoplasmic reticulum	catalytic activity;metal ion binding;protein binding	LEPREL2; P3H3			Collagen biosynthesis and modifying enzymes	23.3763	23.9508	-0.5745	0	0	FDR <= 0.01	23.0405	23.9508	-0.9104	0	0	FDR <= 0.01																					Matrisome-associated	ECM Regulators
6137	Q9UFN0	Q9UFN0	Protein NipSnap homolog 3A OS=Homo sapiens OX=9606 GN=NIPSNAP3A PE=1 SV=2	11	9	101		cytoplasm;cytosol;mitochondrion;nucleus	protein binding	NIPSNAP3A				22.4536	23.0242	-0.5706	0	0	FDR <= 0.01	22.8634	23.0242	-0.1608	0.011	0.0214	FDR <= 0.05
101	Q13228	Q13228;Q13228-4;Q13228-3;Q13228-2;H0Y532;A6PVX1;F8WCR4;F2Z2W8;C9JVL0	Methanethiol oxidase OS=Homo sapiens OX=9606 GN=SELENBP1 PE=1 SV=2	24	24	174	transport	cytoplasm;cytosol;membrane;nucleus	protein binding	SELENBP1	Selenium Metabolism and Selenoproteins; IL1 and megakaryocytes in obesity			23.8661	24.4367	-0.5705	0	0	FDR <= 0.01	24.0133	24.4367	-0.4234	0	0	FDR <= 0.01
6612	B5MED8	B5MED8;Q96PQ0	VPS10 domain-containing receptor SorCS2 OS=Homo sapiens OX=9606 GN=SORCS2 PE=1 SV=4	6	6	19		membrane	protein binding					18.6319	19.2012	-0.5693	0.0026	0.008	FDR <= 0.01	19.1969	19.2012	-0.0044	0.9744	0.9796	FDR > 0.05
5633	Q9NYU1	Q9NYU1;E7EMU6;A6NP03;Q9NYU1-2;A0A1W2PQ18	UDP-glucose:glycoprotein glucosyltransferase 2 OS=Homo sapiens OX=9606 GN=UGGT2 PE=1 SV=4	24	20	112	metabolic process;regulation of biological process;response to stimulus	endoplasmic reticulum;organelle lumen	catalytic activity;protein binding	UGGT2		Protein processing in endoplasmic reticulum	ER Quality Control Compartment (ERQC)	21.6584	22.2258	-0.5675	0	0	FDR <= 0.01	21.7834	22.2258	-0.4424	0	0	FDR <= 0.01
8336	Q9UPU5	Q9UPU5	Ubiquitin carboxyl-terminal hydrolase 24 OS=Homo sapiens OX=9606 GN=USP24 PE=1 SV=3	46	46	227	metabolic process		catalytic activity;protein binding	USP24			Ub-specific processing proteases	23.6496	23.5881	0.0615	0.0299	0.0614	FDR > 0.05	23.6993	23.5881	0.1113	0.0014	0.0037	FDR <= 0.01
1614	Q8TDB4	Q8TDB4	Protein MGARP OS=Homo sapiens OX=9606 GN=MGARP PE=1 SV=1	3	3	9	cellular component movement;regulation of biological process;response to stimulus;transport	membrane;mitochondrion	protein binding	MGARP				22.4428	23.0101	-0.5673	0	0	FDR <= 0.01	22.4243	23.0101	-0.5858	0	0	FDR <= 0.01
8093	Q07065	Q07065	Cytoskeleton-associated protein 4 OS=Homo sapiens OX=9606 GN=CKAP4 PE=1 SV=2	46	45	813	metabolic process;transport	cytoplasm;cytoskeleton;cytosol;endoplasmic reticulum;membrane;organelle lumen	RNA binding	CKAP4		Protein processing in endoplasmic reticulum	Post-translational protein phosphorylation; Regulation of Insulin-like Growth Factor (IGF) transport and uptake by Insulin-like Growth Factor Binding Proteins (IGFBPs); Surfactant metabolism; Neutrophil degranulation	27.2873	27.8541	-0.5668	0	0	FDR <= 0.01	27.5339	27.8541	-0.3202	0.0001	0.0003	FDR <= 0.01
1370	Q15758	Q15758;M0QXM4;Q15758-3;Q15758-2;M0QX44	Neutral amino acid transporter B(0) OS=Homo sapiens OX=9606 GN=SLC1A5 PE=1 SV=2	6	6	33	transport	membrane	protein binding;receptor activity;transporter activity	SLC1A5	TYROBP Causal Network	Central carbon metabolism in cancer; Protein digestion and absorption	Amino acid transport across the plasma membrane	20.5101	21.0765	-0.5663	0	0	FDR <= 0.01	21.6069	21.0765	0.5304	0	0	FDR <= 0.01
6990	Q16822	Q16822;H0YM31;Q16822-3;H0YML5;A0A0A0MS74;H0YNG4;H0YMA5;H0YMU6	Phosphoenolpyruvate carboxykinase [GTP], mitochondrial OS=Homo sapiens OX=9606 GN=PCK2 PE=1 SV=4	19	19	120								21.5639	22.13	-0.5661	0	0	FDR <= 0.01	22.1413	22.13	0.0113	0.7251	0.7747	FDR > 0.05
5086	P48681	P48681	Nestin OS=Homo sapiens OX=9606 GN=NES PE=1 SV=2	47	47	231	cell organization and biogenesis;cell proliferation;development;regulation of biological process	cytoplasm;cytoskeleton	protein binding;structural molecule activity	NES				24.4893	24.4827	0.0066	0.9405	0.9576	FDR > 0.05	24.0111	24.4827	-0.4716	0.0006	0.0018	FDR <= 0.01
6283	Q6NXT6	Q6NXT6;Q6NXT6-2	Transmembrane anterior posterior transformation protein 1 homolog OS=Homo sapiens OX=9606 GN=TAPT1 PE=1 SV=1	2	2	8	cell differentiation;cell organization and biogenesis;development;regulation of biological process;response to stimulus	cytoplasm;cytoskeleton;membrane	receptor activity;signal transducer activity	TAPT1				18.6613	19.225	-0.5637	0	0.0003	FDR <= 0.01	18.4237	19.225	-0.8013	0	0	FDR <= 0.01
6973	P06737	P06737;P06737-2;E9PK47	Glycogen phosphorylase, liver form OS=Homo sapiens OX=9606 GN=PYGL PE=1 SV=4	44	33	453	cell death;metabolic process;transport	cytoplasm;cytosol;extracellular;organelle lumen	catalytic activity;nucleotide binding;protein binding	PYGL	TNF alpha Signaling Pathway; Glycogen Metabolism	Starch and sucrose metabolism; Insulin resistance; Insulin signaling pathway; Metabolic pathways; Glucagon signaling pathway	Neutrophil degranulation; Glycogen breakdown (glycogenolysis)	25.4853	25.3662	0.1192	0.0038	0.011	FDR <= 0.05	25.573	25.3662	0.2069	0.0001	0.0004	FDR <= 0.01
6562	Q9H425	Q9H425-3;Q9H425;Q9H425-2;E5RI90	Uncharacterized protein C1orf198 OS=Homo sapiens OX=9606 GN=C1orf198 PE=1 SV=1	6	6	30		cytoplasm;cytosol		C1orf198				20.7691	21.3321	-0.563	0	0.0001	FDR <= 0.01	21.2182	21.3321	-0.1139	0.0569	0.0887	FDR > 0.05
5842	P14866	P14866;P14866-2;M0QXS5;M0QYL7	Heterogeneous nuclear ribonucleoprotein L OS=Homo sapiens OX=9606 GN=HNRNPL PE=1 SV=2	20	4	327	metabolic process;regulation of biological process	cytoplasm;membrane;nucleus	DNA binding;protein binding;RNA binding	HNRNPL	mRNA Processing		mRNA Splicing - Major Pathway	24.7871	24.7317	0.0554	0.2253	0.3189	FDR > 0.05	24.5686	24.7317	-0.1631	0.0048	0.0104	FDR <= 0.05
4077	Q9H5K3	Q9H5K3	Protein O-mannose kinase OS=Homo sapiens OX=9606 GN=POMK PE=1 SV=1	2	2	8	cellular component movement;metabolic process;response to stimulus	endoplasmic reticulum;membrane	catalytic activity;nucleotide binding	POMK; SGK196			O-linked glycosylation	16.4532	17.0155	-0.5624	0.0017	0.0056	FDR <= 0.01	16.537	17.0155	-0.4786	0.0043	0.0094	FDR <= 0.01
6733	P55265-2	P55265-3;P55265-2;A0A3B3IRQ9;H0YCK3	Isoform 2 of Double-stranded RNA-specific adenosine deaminase OS=Homo sapiens OX=9606 GN=ADAR	45	1	307	cell differentiation;cell organization and biogenesis;defense response;metabolic process;regulation of biological process;response to stimulus	cytoplasm;membrane;nucleus;spliceosomal complex	catalytic activity;DNA binding;metal ion binding;protein binding;RNA binding	ADAR				14.4888	14.3386	0.1502	0.3194	0.4193	FDR > 0.05	14.4966	14.3386	0.158	0.2965	0.3668	FDR > 0.05
4005	A0A1W2PQU8	A0A1W2PQU8	Spindlin-3 OS=Homo sapiens OX=9606 GN=SPIN3 PE=1 SV=1	2	1	7								20.0262	20.5876	-0.5614	0.0003	0.0015	FDR <= 0.01	20.3814	20.5876	-0.2062	0.058	0.0902	FDR > 0.05
6629	Q6UXV4	A0A087WYF7;Q6UXV4;A0A087WUX8	MICOS complex subunit MIC27 OS=Homo sapiens OX=9606 GN=APOOL PE=1 SV=1	11	11	93	cell organization and biogenesis;transport	extracellular;membrane;mitochondrion;organelle lumen	protein binding	APOOL			Platelet degranulation ; Cristae formation	22.8144	23.3746	-0.5602	0	0.0001	FDR <= 0.01	23.0043	23.3746	-0.3703	0.0001	0.0004	FDR <= 0.01
3469	Q8WWX9	A0A087WWF1;Q8WWX9	Selenoprotein M OS=Homo sapiens OX=9606 GN=SELENOM PE=1 SV=3	5	5	28	metabolic process;response to stimulus;transport	cytoplasm;endoplasmic reticulum;Golgi	protein binding	SELM; SELENOM	Selenium Micronutrient Network; Selenium Metabolism and Selenoproteins			20.1566	20.7164	-0.5597	0.0002	0.0008	FDR <= 0.01	20.01	20.7164	-0.7064	0	0.0001	FDR <= 0.01
6698	O94915	O94915;A0A2C9F2R7;A0A286YEZ9;F2Z2S2;H0Y9X0;A0A6E1XQM6;A0A669KB90;D6RJI4;O94915-2;D6R9B9	Protein furry homolog-like OS=Homo sapiens OX=9606 GN=FRYL PE=1 SV=2	43	42	211	cell organization and biogenesis;metabolic process;regulation of biological process			FRYL				23.4997	23.4097	0.09	0.0042	0.0119	FDR <= 0.05	23.0822	23.4097	-0.3275	0	0	FDR <= 0.01
1146	Q14974	Q14974;Q14974-2;J3KTM9;J3QKQ5;J3QR48;J3QRG4	Importin subunit beta-1 OS=Homo sapiens OX=9606 GN=KPNB1 PE=1 SV=2	25	25	460	cell organization and biogenesis;cellular component movement;metabolic process;regulation of biological process;response to stimulus;transport	cytoplasm;cytosol;extracellular;membrane;nucleus;organelle lumen	metal ion binding;protein binding;RNA binding;transporter activity	KPNB1	Sterol Regulatory Element-Binding Proteins (SREBP) signalling	RNA transport	ISG15 antiviral mechanism; NS1 Mediated Effects on Host Pathways; Nuclear import of Rev protein; Neutrophil degranulation; Regulation of cholesterol biosynthesis by SREBP (SREBF); Transport of Ribonucleoproteins into the Host Nucleus; Activation of DNA fragmentation factor	25.7779	25.8007	-0.0229	0.3935	0.4968	FDR > 0.05	25.8262	25.8007	0.0254	0.3447	0.4152	FDR > 0.05
2344	P07942	P07942;G3XAI2;E7EPA6	Laminin subunit beta-1 OS=Homo sapiens OX=9606 GN=LAMB1 PE=1 SV=2	27	27	121	cell differentiation;cell organization and biogenesis;cellular component movement;metabolic process;regulation of biological process;response to stimulus;transport	extracellular;membrane;organelle lumen	catalytic activity;motor activity;nucleotide binding;protein binding;signal transducer activity;structural molecule activity	LAMB1	Alpha 6 Beta 4 signaling pathway; Focal Adhesion; Focal Adhesion-PI3K-Akt-mTOR-signaling pathway; Inflammatory Response Pathway	Toxoplasmosis; ECM-receptor interaction; Amoebiasis; Focal adhesion; Pathways in cancer; PI3K-Akt signaling pathway; Small cell lung cancer	ECM proteoglycans; Post-translational protein phosphorylation; Regulation of Insulin-like Growth Factor (IGF) transport and uptake by Insulin-like Growth Factor Binding Proteins (IGFBPs); L1CAM interactions; Laminin interactions; Degradation of the extracellular matrix; MET activates PTK2 signaling; Non-integrin membrane-ECM interactions	22.9396	23.4977	-0.5581	0	0	FDR <= 0.01	23.6816	23.4977	0.1839	0.0001	0.0004	FDR <= 0.01																					Core matrisome	ECM Glycoproteins
4062	O60664	O60664;O60664-4;K7ERZ3;O60664-2	Perilipin-3 OS=Homo sapiens OX=9606 GN=PLIN3 PE=1 SV=3	26	1	615	transport	cytoplasm;cytosol;endosome;Golgi;membrane	protein binding	PLIN3			Triglyceride catabolism; Retrograde transport at the Trans-Golgi-Network	21.7603	21.8683	-0.1081	0.1332	0.2085	FDR > 0.05	21.7782	21.8683	-0.0901	0.2007	0.2627	FDR > 0.05
2656	Q9Y680-3	Q9Y680-3	Isoform 3 of Peptidyl-prolyl cis-trans isomerase FKBP7 OS=Homo sapiens OX=9606 GN=FKBP7	15	1	126	metabolic process	cytoplasm;organelle lumen	catalytic activity;metal ion binding;protein binding	FKBP7				23.8882	24.4458	-0.5576	0	0	FDR <= 0.01	24.0022	24.4458	-0.4437	0	0	FDR <= 0.01
1007	O00625	O00625	Pirin OS=Homo sapiens OX=9606 GN=PIR PE=1 SV=1	5	5	20	cell differentiation;metabolic process;regulation of biological process	cytoplasm;cytosol;nucleus	catalytic activity;metal ion binding;protein binding	PIR			Digestion	19.1077	19.6639	-0.5562	0	0	FDR <= 0.01	20.1283	19.6639	0.4644	0	0	FDR <= 0.01
6352	P51553	P51553;E7EQB8;P51553-2;G5E9Q7;E9PF84;H0Y5Q7;H7C1W2	Isocitrate dehydrogenase [NAD] subunit gamma, mitochondrial OS=Homo sapiens OX=9606 GN=IDH3G PE=1 SV=1	8	8	69	metabolic process	mitochondrion;organelle lumen	catalytic activity;metal ion binding;nucleotide binding	IDH3G	TCA Cycle	2-Oxocarboxylic acid metabolism; Carbon metabolism; Metabolic pathways; Biosynthesis of amino acids; Citrate cycle (TCA cycle)	Mitochondrial protein import; Metabolism of proteins; Citric acid cycle (TCA cycle)	21.981	22.5365	-0.5555	0	0	FDR <= 0.01	22.3592	22.5365	-0.1773	0.0037	0.0083	FDR <= 0.01
4260	P50990	P50990;P50990-2;P50990-3;H7C4C8;H7C2U0	T-complex protein 1 subunit theta OS=Homo sapiens OX=9606 GN=CCT8 PE=1 SV=4	32	32	415	cell organization and biogenesis;metabolic process;regulation of biological process;transport	cytoplasm;cytoskeleton;cytosol;extracellular;organelle lumen	catalytic activity;nucleotide binding;protein binding	CCT8			BBSome-mediated cargo-targeting to cilium; Prefoldin mediated transfer of substrate to CCT/TriC; Cooperation of PDCL (PhLP1) and TRiC/CCT in G-protein beta folding; Association of TriC/CCT with target proteins during biosynthesis; Neutrophil degranulation; Folding of actin by CCT/TriC; Formation of tubulin folding intermediates by CCT/TriC	26.3324	26.2974	0.035	0.2133	0.3058	FDR > 0.05	26.3453	26.2974	0.0479	0.1014	0.1458	FDR > 0.05
2711	O60664-3	O60664-3	Isoform 3 of Perilipin-3 OS=Homo sapiens OX=9606 GN=PLIN3	26	1	607	transport	cytoplasm;cytosol;endosome;Golgi;membrane	protein binding	PLIN3				26.4423	26.4638	-0.0216	0.4901	0.5908	FDR > 0.05	26.4161	26.4638	-0.0478	0.1482	0.2023	FDR > 0.05
869	P17980	P17980;R4GNH3;E9PM69;E9PMD8;E9PN50;E9PKD5;E9PLG2	26S proteasome regulatory subunit 6A OS=Homo sapiens OX=9606 GN=PSMC3 PE=1 SV=3	21	21	267	metabolic process;regulation of biological process;response to stimulus;transport	cytoplasm;cytosol;extracellular;membrane;nucleus;organelle lumen;proteasome	catalytic activity;enzyme regulator activity;nucleotide binding;protein binding	PSMC3	Proteasome Degradation; Parkin-Ubiquitin Proteasomal System pathway	Proteasome; Epstein-Barr virus infection	Regulation of RAS by GAPs; CDT1 association with the CDC6:ORC:origin complex; Downstream TCR signaling; UCH proteinases; NIK-->noncanonical NF-kB signaling; Hh mutants that don't undergo autocatalytic processing are degraded by ERAD; SCF-beta-TrCP mediated degradation of Emi1; Neutrophil degranulation; Cross-presentation of soluble exogenous antigens (endosomes); Separation of Sister Chromatids; …	25.4808	25.4807	0.0001	0.9985	0.999	FDR > 0.05	25.5247	25.4807	0.044	0.1393	0.1919	FDR > 0.05
3901	Q10472	Q10472;K7EJV8;Q8IUC8-2;Q8IUC8;Q8IUC8-3	Polypeptide N-acetylgalactosaminyltransferase 1 OS=Homo sapiens OX=9606 GN=GALNT1 PE=1 SV=1	11	11	54	metabolic process	extracellular;Golgi;membrane	catalytic activity;metal ion binding	GALNT1		Mucin type O-glycan biosynthesis; Metabolic pathways	COPI-independent Golgi-to-ER retrograde traffic; O-linked glycosylation of mucins	21.754	22.3078	-0.5538	0	0	FDR <= 0.01	22.0013	22.3078	-0.3065	0	0.0002	FDR <= 0.01
8311	Q9BSJ8-2	Q9BSJ8-2	Isoform 2 of Extended synaptotagmin-1 OS=Homo sapiens OX=9606 GN=ESYT1	35	1	314	metabolic process;transport	endoplasmic reticulum;membrane	metal ion binding;protein binding	ESYT1									NA						NA
6690	Q6P2E9	Q6P2E9;Q6P2E9-2;I3L2F4;I3L0V0;I3L3M2	Enhancer of mRNA-decapping protein 4 OS=Homo sapiens OX=9606 GN=EDC4 PE=1 SV=1	33	33	229	metabolic process	cytoplasm;cytosol;membrane;nucleus	protein binding	EDC4		RNA degradation	mRNA decay by 5' to 3' exoribonuclease	22.8617	22.7891	0.0726	0.0077	0.0198	FDR <= 0.05	22.706	22.7891	-0.0831	0.0037	0.0084	FDR <= 0.01
7697	Q13435	Q13435;E9PPJ0;H0YCG1;E9PJ04;E9PJT3;H0YEX5;E9PIL8	Splicing factor 3B subunit 2 OS=Homo sapiens OX=9606 GN=SF3B2 PE=1 SV=2	32	32	230	metabolic process	nucleus;spliceosomal complex	protein binding;RNA binding	SF3B2	mRNA Processing	Spliceosome	mRNA Splicing - Major Pathway; mRNA Splicing - Minor Pathway	25.2561	25.1768	0.0793	0.039	0.0762	FDR > 0.05	24.9848	25.1768	-0.1919	0.0003	0.0011	FDR <= 0.01
5905	Q9UP65	Q9UP65;Q9UP65-3;Q9UP65-2;M0QZB1;M0QY18	Cytosolic phospholipase A2 gamma OS=Homo sapiens OX=9606 GN=PLA2G4C PE=1 SV=2	3	3	11	defense response;metabolic process;regulation of biological process;response to stimulus	cytosol;membrane	catalytic activity	PLA2G4C		Ovarian steroidogenesis; Inflammatory mediator regulation of TRP channels; Ether lipid metabolism; Long-term depression; Arachidonic acid metabolism; Platelet activation; VEGF signaling pathway; alpha-Linolenic acid metabolism; Glutamatergic synapse; Fc epsilon RI signaling pathway; Serotonergic synapse; Choline metabolism in cancer; Oxytocin signaling pathway; GnRH signaling pathway; Phospholipa…	Acyl chain remodelling of PI; Hydrolysis of LPC; Hydrolysis of LPE; Acyl chain remodelling of PE; Acyl chain remodelling of PC	15.9503	16.503	-0.5527	0.0001	0.0008	FDR <= 0.01	16.9027	16.503	0.3997	0.0012	0.0033	FDR <= 0.01
5472	Q6NVY1	Q6NVY1;Q6NVY1-2;B9A058;F8W8A6;B8ZZZ0;H7C1A5;H7C126	3-hydroxyisobutyryl-CoA hydrolase, mitochondrial OS=Homo sapiens OX=9606 GN=HIBCH PE=1 SV=2	17	17	138	metabolic process	mitochondrion;organelle lumen	catalytic activity	HIBCH	Amino Acid metabolism	Valine, leucine and isoleucine degradation; Carbon metabolism; Metabolic pathways; Propanoate metabolism; beta-Alanine metabolism	Branched-chain amino acid catabolism	23.828	24.3806	-0.5526	0	0	FDR <= 0.01	23.7906	24.3806	-0.5899	0	0	FDR <= 0.01
1326	Q02880	Q02880-2;Q02880;E9PCY5;H7BZ82	DNA topoisomerase 2-beta OS=Homo sapiens OX=9606 GN=TOP2B PE=1 SV=3	48	35	269	cell organization and biogenesis;cellular component movement;metabolic process;regulation of biological process	cytoplasm;cytosol;nucleus	catalytic activity;DNA binding;metal ion binding;nucleotide binding;protein binding	TOP2B		Platinum drug resistance	SUMOylation of DNA replication proteins	24.6146	24.6611	-0.0465	0.1645	0.2484	FDR > 0.05	24.3383	24.6611	-0.3227	0	0	FDR <= 0.01
4642	Q9HCC0	Q9HCC0;Q9HCC0-2;D6RD67;D6RDF7;D6R9R1;A0A0G2JM88	Methylcrotonoyl-CoA carboxylase beta chain, mitochondrial OS=Homo sapiens OX=9606 GN=MCCC2 PE=1 SV=1	18	18	154	cell organization and biogenesis;metabolic process	cytosol;mitochondrion;organelle lumen	catalytic activity;nucleotide binding;protein binding	MCCC2		Valine, leucine and isoleucine degradation; Metabolic pathways	Branched-chain amino acid catabolism; Biotin transport and metabolism; Defective HLCS causes multiple carboxylase deficiency	22.8939	23.4463	-0.5524	0	0	FDR <= 0.01	22.8847	23.4463	-0.5616	0	0	FDR <= 0.01
7745	P48643	P48643;B7ZAR1;E9PCA1;E7ENZ3;P48643-2;H0Y914	T-complex protein 1 subunit epsilon OS=Homo sapiens OX=9606 GN=CCT5 PE=1 SV=1	33	32	449	metabolic process;regulation of biological process;response to stimulus;transport	cytoplasm;cytoskeleton;cytosol	nucleotide binding;protein binding;RNA binding	CCT5			BBSome-mediated cargo-targeting to cilium; Prefoldin mediated transfer of substrate to CCT/TriC; Cooperation of PDCL (PhLP1) and TRiC/CCT in G-protein beta folding; Association of TriC/CCT with target proteins during biosynthesis; Formation of tubulin folding intermediates by CCT/TriC; Folding of actin by CCT/TriC	27.2033	27.195	0.0083	0.7868	0.8402	FDR > 0.05	27.2313	27.195	0.0362	0.2585	0.3264	FDR > 0.05
5353	Q03252	Q03252	Lamin-B2 OS=Homo sapiens OX=9606 GN=LMNB2 PE=1 SV=4	40	35	374		membrane;nucleus	catalytic activity;motor activity;protein binding;structural molecule activity	LMNB2	Gastric cancer network 2; Fas Ligand (FasL) pathway and Stress induction of Heat Shock Proteins (HSP) regulation	Apoptosis		25.6408	25.6266	0.0142	0.6445	0.7257	FDR > 0.05	25.4167	25.6266	-0.2099	0.0001	0.0004	FDR <= 0.01
1078	Q15393	Q15393;Q15393-3;Q15393-2;I3L4G7;J3QL37;J3QRB2	Splicing factor 3B subunit 3 OS=Homo sapiens OX=9606 GN=SF3B3 PE=1 SV=4	34	34	277	cell organization and biogenesis;metabolic process;regulation of biological process	nucleus;spliceosomal complex	protein binding;RNA binding	SF3B3	mRNA Processing	Spliceosome	mRNA Splicing - Major Pathway; mRNA Splicing - Minor Pathway	24.5727	24.5001	0.0726	0.0706	0.1244	FDR > 0.05	24.3931	24.5001	-0.107	0.0153	0.0285	FDR <= 0.05
6541	Q9P2R3	Q9P2R3;Q9P2R3-4;Q9P2R3-2;K7EPT2;I3L3P8	Rabankyrin-5 OS=Homo sapiens OX=9606 GN=ANKFY1 PE=1 SV=2	33	32	245	cell organization and biogenesis;regulation of biological process;transport	cytoplasm;cytosol;endosome;membrane	metal ion binding;protein binding	ANKFY1				24.4228	24.344	0.0788	0.0155	0.0357	FDR <= 0.05	24.621	24.344	0.2769	0	0	FDR <= 0.01
3573	P55268	P55268;F5H520	Laminin subunit beta-2 OS=Homo sapiens OX=9606 GN=LAMB2 PE=1 SV=2	42	42	232	cell growth;cell organization and biogenesis;cellular component movement;metabolic process;regulation of biological process;transport	cytoplasm;extracellular;Golgi;organelle lumen	catalytic activity;motor activity;nucleotide binding;protein binding;structural molecule activity;transporter activity	LAMB2	Alpha 6 Beta 4 signaling pathway; Primary Focal Segmental Glomerulosclerosis FSGS; miRNA targets in ECM and membrane receptors; Focal Adhesion; Focal Adhesion-PI3K-Akt-mTOR-signaling pathway; Inflammatory Response Pathway	ECM-receptor interaction; Toxoplasmosis; Small cell lung cancer; Pathways in cancer; PI3K-Akt signaling pathway; Focal adhesion; Amoebiasis	ECM proteoglycans; Post-translational protein phosphorylation; Regulation of Insulin-like Growth Factor (IGF) transport and uptake by Insulin-like Growth Factor Binding Proteins (IGFBPs); Laminin interactions; MET activates PTK2 signaling; Non-integrin membrane-ECM interactions	23.842	23.9042	-0.0622	0.086	0.1461	FDR > 0.05	23.2077	23.9042	-0.6965	0	0	FDR <= 0.01																					Core matrisome	ECM Glycoproteins
4887	Q9BXN1	Q9BXN1	Asporin OS=Homo sapiens OX=9606 GN=ASPN PE=1 SV=2	2	2	7	regulation of biological process;response to stimulus	cytoplasm;extracellular	enzyme regulator activity;metal ion binding;protein binding	ASPN			ECM proteoglycans	15.8732	16.4247	-0.5515	0.0015	0.0051	FDR <= 0.01	15.9892	16.4247	-0.4355	0.0057	0.0122	FDR <= 0.05																					Core matrisome	Proteoglycans
3719	Q96A65	Q96A65;Q96A65-2	Exocyst complex component 4 OS=Homo sapiens OX=9606 GN=EXOC4 PE=1 SV=1	36	36	256	cell communication;cell organization and biogenesis;regulation of biological process;transport	cytoplasm;cytosol;membrane	protein binding	EXOC4		Tight junction	Translocation of GLUT4 to the plasma membrane; Insulin processing; VxPx cargo-targeting to cilium	24.2853	24.219	0.0663	0.0385	0.0754	FDR > 0.05	24.4214	24.219	0.2024	0.0001	0.0003	FDR <= 0.01
3673	P40926	P40926;P40926-2;G3XAL0	Malate dehydrogenase, mitochondrial OS=Homo sapiens OX=9606 GN=MDH2 PE=1 SV=3	17	17	281	metabolic process	membrane;mitochondrion;nucleus;organelle lumen	catalytic activity;nucleotide binding;protein binding;RNA binding	MDH2	Amino Acid metabolism; Glycolysis and Gluconeogenesis; TCA Cycle	Metabolic pathways; Citrate cycle (TCA cycle); Glyoxylate and dicarboxylate metabolism; Pyruvate metabolism; Cysteine and methionine metabolism; Carbon metabolism	Gluconeogenesis; Citric acid cycle (TCA cycle)	26.8842	27.4355	-0.5513	0	0	FDR <= 0.01	27.2159	27.4355	-0.2196	0	0.0002	FDR <= 0.01
5255	O00203	O00203;O00203-3;Q13367-4;Q13367;A0A2R8Y2A8;A0A590UKC4;A0A590UJ60;A0A5F9UJV3;Q13367-3;H0YBD0;A0A590UJW5;A0A590UJU0;A0A590UK04;A0A590UKD3;A0A590UJU7;A0A590UJE5;F5GWU4;A0A590UK30;A0A590UK64	AP-3 complex subunit beta-1 OS=Homo sapiens OX=9606 GN=AP3B1 PE=1 SV=3	39	39	344	cell organization and biogenesis;cellular component movement;coagulation;regulation of biological process;transport	Golgi;membrane	protein binding	AP3B1		Lysosome	Signaling by BRAF and RAF fusions; Golgi Associated Vesicle Biogenesis	25.1226	25.169	-0.0464	0.0597	0.1087	FDR > 0.05	25.2808	25.169	0.1118	0.0007	0.0021	FDR <= 0.01
6735	H7BYJ3	H7BYJ3;O14578-3	Citron Rho-interacting kinase (Fragment) OS=Homo sapiens OX=9606 GN=CIT PE=1 SV=1	49	1	259	metabolic process;regulation of biological process;response to stimulus;transport		catalytic activity;nucleotide binding;structural molecule activity;transporter activity					16.5475	16.0536	0.4938	0.0812	0.1396	FDR > 0.05	15.7489	16.0536	-0.3047	0.2533	0.3208	FDR > 0.05
2682	Q92878	Q92878;Q92878-2;A0A1W2PQ90;Q92878-3;A0A494C1B7;A0A494C122;A0A494BZX5;E7EN38;E7ESD9;A0A494C0Y7;A0A494BZX8;C9JNH8;H7C0P8;E9PM98;H7C0V2	DNA repair protein RAD50 OS=Homo sapiens OX=9606 GN=RAD50 PE=1 SV=1	53	53	276	cell organization and biogenesis;metabolic process;regulation of biological process;response to stimulus	chromosome;membrane;nucleus	catalytic activity;DNA binding;metal ion binding;nucleotide binding;protein binding	RAD50	miRNA Regulation of DNA Damage Response; Homologous recombination; DDX1 as a regulatory component of the Drosha microprocessor; ATM Signaling Network in Development and Disease; Non-homologous end joining; DNA Damage Response	Homologous recombination; Non-homologous end-joining	G2/M DNA damage checkpoint; Presynaptic phase of homologous DNA pairing and strand exchange; Nonhomologous End-Joining (NHEJ); Resolution of D-loop Structures through Synthesis-Dependent Strand Annealing (SDSA); Meiotic recombination; Sensing of DNA Double Strand Breaks; Recruitment and ATM-mediated phosphorylation of repair and signaling proteins at DNA double strand breaks; Processing of DNA do…	24.7779	24.756	0.0219	0.413	0.5159	FDR > 0.05	24.7939	24.756	0.0379	0.1724	0.2308	FDR > 0.05
4179	Q92900	Q92900;Q92900-2	Regulator of nonsense transcripts 1 OS=Homo sapiens OX=9606 GN=UPF1 PE=1 SV=2	35	35	272	cell organization and biogenesis;cellular homeostasis;metabolic process;regulation of biological process;response to stimulus;transport	chromosome;cytoplasm;cytosol;nucleus;spliceosomal complex	catalytic activity;DNA binding;metal ion binding;nucleotide binding;protein binding;RNA binding	UPF1		mRNA surveillance pathway; RNA transport	Nonsense Mediated Decay (NMD) independent of the Exon Junction Complex (EJC); Nonsense Mediated Decay (NMD) enhanced by the Exon Junction Complex (EJC)	25.2266	25.2241	0.0025	0.9499	0.9642	FDR > 0.05	25.3095	25.2241	0.0854	0.0592	0.0917	FDR > 0.05
2151	Q13740	Q13740;Q13740-2;F5GXJ9;H7C543;Q13740-4;Q13740-3	CD166 antigen OS=Homo sapiens OX=9606 GN=ALCAM PE=1 SV=2	24	24	279	cell growth;cellular component movement;regulation of biological process;response to stimulus	extracellular;membrane	protein binding	ALCAM		Cell adhesion molecules (CAMs)	L1CAM interactions	25.4391	25.3854	0.0537	0.1191	0.1901	FDR > 0.05	24.6519	25.3854	-0.7335	0	0	FDR <= 0.01
3390	O00429-8	O00429-8;O00429-2;G8JLD5;O00429-4	Isoform 8 of Dynamin-1-like protein OS=Homo sapiens OX=9606 GN=DNM1L	35	1	235	cell death;cell organization and biogenesis;regulation of biological process;transport	cytoplasm;cytosol;endoplasmic reticulum;Golgi;membrane;mitochondrion	catalytic activity;enzyme regulator activity;nucleotide binding;protein binding	DNM1L	Synaptic Vesicle Pathway			24.6107	24.6539	-0.0432	0.2726	0.3709	FDR > 0.05	24.591	24.6539	-0.063	0.1245	0.1742	FDR > 0.05
3061	A0A494C1L5	A0A494C1L5;P50851-2;P50851;E9PEM5;A0A494BZW2;A0A494C0R9;H0YAC6;A0A3B3IS13;A0A3B3ISK3;A0A3B3IU76	Lipopolysaccharide-responsive and beige-like anchor protein OS=Homo sapiens OX=9606 GN=LRBA PE=1 SV=1	45	43	224								22.9028	22.9164	-0.0135	0.6025	0.6899	FDR > 0.05	22.6415	22.9164	-0.2749	0	0	FDR <= 0.01
5748	Q9UHB6	Q9UHB6;Q9UHB6-4;F8VQE1;Q9UHB6-2;Q9UHB6-5;Q9UHB6-3;F8VS07;F8VRN8;F8VTU2	LIM domain and actin-binding protein 1 OS=Homo sapiens OX=9606 GN=LIMA1 PE=1 SV=1	39	33	367	cell organization and biogenesis;regulation of biological process	cytoplasm;cytoskeleton	metal ion binding;protein binding	LIMA1				26.4385	26.425	0.0135	0.6594	0.7379	FDR > 0.05	25.9116	26.425	-0.5134	0	0	FDR <= 0.01
1801	O00429	O00429;O00429-6;O00429-3;O00429-7	Dynamin-1-like protein OS=Homo sapiens OX=9606 GN=DNM1L PE=1 SV=2	35	1	233	cell death;cell organization and biogenesis;regulation of biological process;response to stimulus;transport	cytoplasm;cytoskeleton;cytosol;endoplasmic reticulum;Golgi;membrane;mitochondrion	catalytic activity;enzyme regulator activity;nucleotide binding;protein binding	DNM1L	Synaptic Vesicle Pathway	TNF signaling pathway; NOD-like receptor signaling pathway	Apoptotic execution phase	16.6422	16.6336	0.0086	0.9456	0.9617	FDR > 0.05	16.779	16.6336	0.1455	0.268	0.3367	FDR > 0.05
6339	P31939	P31939;P31939-2;H7C1S2;C9JLK0;F8WEF0	Bifunctional purine biosynthesis protein PURH OS=Homo sapiens OX=9606 GN=ATIC PE=1 SV=3	31	31	282	metabolic process;response to stimulus	cytosol;membrane;mitochondrion	catalytic activity;protein binding	ATIC	One Carbon Metabolism	One carbon pool by folate; Purine metabolism; Metabolic pathways; Antifolate resistance	Purine ribonucleoside monophosphate biosynthesis	25.5593	25.4655	0.0938	0.0305	0.0623	FDR > 0.05	25.6345	25.4655	0.169	0.0015	0.0039	FDR <= 0.01
3982	P60842	P60842;J3KT12;P60842-2;J3QS69;J3KTB5;J3QL43;J3QR64;J3QLN6;J3KSZ0;J3KS25;J3QKZ9;J3KTN0;J3QL52	Eukaryotic initiation factor 4A-I OS=Homo sapiens OX=9606 GN=EIF4A1 PE=1 SV=1	20	8	429	metabolic process;regulation of biological process	cytoplasm;cytosol;membrane;nucleus	catalytic activity;DNA binding;nucleotide binding;protein binding;RNA binding	EIF4A1	Translation Factors; Interferon type I signaling pathways	RNA transport	ISG15 antiviral mechanism; L13a-mediated translational silencing of Ceruloplasmin expression; Translation initiation complex formation; GTP hydrolysis and joining of the 60S ribosomal subunit; Deadenylation of mRNA; Ribosomal scanning and start codon recognition	24.9615	24.8834	0.078	0.0195	0.043	FDR <= 0.05	25.184	24.8834	0.3005	0	0	FDR <= 0.01
480	Q86W92	Q86W92;Q86W92-4;Q86W92-3;F5GZP6	Liprin-beta-1 OS=Homo sapiens OX=9606 GN=PPFIBP1 PE=1 SV=2	36	2	263	cell organization and biogenesis;metabolic process	cytosol;membrane	protein binding	PPFIBP1			Receptor-type tyrosine-protein phosphatases	24.4608	24.4316	0.0292	0.4366	0.5392	FDR > 0.05	25.2374	24.4316	0.8058	0	0	FDR <= 0.01
8221	P50213	P50213;P50213-2;H0YL72;H0YMU3;H0YNF5;H0YLI6;H0YM46;H0YKD0;H0YM64	Isocitrate dehydrogenase [NAD] subunit alpha, mitochondrial OS=Homo sapiens OX=9606 GN=IDH3A PE=1 SV=1	17	17	151	metabolic process	mitochondrion;nucleus;organelle lumen	catalytic activity;metal ion binding;nucleotide binding	IDH3A	TCA Cycle and Deficiency of Pyruvate Dehydrogenase complex (PDHc); TCA Cycle	2-Oxocarboxylic acid metabolism; Carbon metabolism; Metabolic pathways; Biosynthesis of amino acids; Citrate cycle (TCA cycle)	Citric acid cycle (TCA cycle)	23.8449	24.3869	-0.542	0	0	FDR <= 0.01	24.2168	24.3869	-0.1701	0.0015	0.0038	FDR <= 0.01
1849	A0A087WYN9	A0A087WYN9;Q7Z478	ATP-dependent RNA helicase DHX29 OS=Homo sapiens OX=9606 GN=DHX29 PE=1 SV=1	38	37	215	metabolic process;regulation of biological process	cytoplasm	catalytic activity;nucleotide binding;RNA binding					23.4752	23.5668	-0.0916	0.0065	0.0172	FDR <= 0.05	23.693	23.5668	0.1262	0.001	0.0028	FDR <= 0.01
2852	P17987	P17987;E7EQR6;E7ERF2;F5H282;F5GZ03;F5GZI8;F5GYL4	T-complex protein 1 subunit alpha OS=Homo sapiens OX=9606 GN=TCP1 PE=1 SV=1	27	19	339	cell organization and biogenesis;metabolic process;regulation of biological process;response to stimulus;transport	cytoplasm;cytoskeleton;cytosol;Golgi	nucleotide binding;protein binding;RNA binding	TCP1			BBSome-mediated cargo-targeting to cilium; Prefoldin mediated transfer of substrate to CCT/TriC; Gene and protein expression by JAK-STAT signaling after Interleukin-12 stimulation; Cooperation of PDCL (PhLP1) and TRiC/CCT in G-protein beta folding; Association of TriC/CCT with target proteins during biosynthesis; Folding of actin by CCT/TriC; Formation of tubulin folding intermediates by CCT/TriC…	26.184	26.1352	0.0488	0.1016	0.1672	FDR > 0.05	26.2031	26.1352	0.0679	0.0331	0.0554	FDR > 0.05
7740	Q86W92-2	Q86W92-2	Isoform 2 of Liprin-beta-1 OS=Homo sapiens OX=9606 GN=PPFIBP1	35	1	255	cell organization and biogenesis	cytosol;membrane	protein binding	PPFIBP1				16.989	16.898	0.091	0.0762	0.1326	FDR > 0.05	17.7271	16.898	0.8291	0	0	FDR <= 0.01
70	A8MXP9	A0A0R4J2E8;A8MXP9;D6REM6;D6R991;H0Y8T4;P43243-2;B3KM87;Q68E03;D6RBK5;D6RE02;D6RIA2;D6RBI2;A0A1B0GX04;D6R9F3;D6RB45;D6RBS2;D6R8Z5;D6RCM3;D6REK4	Matrin-3 OS=Homo sapiens OX=9606 GN=MATR3 PE=1 SV=1	35	35	332		nucleus	metal ion binding;RNA binding					25.7427	25.6957	0.047	0.0537	0.0995	FDR > 0.05	25.5132	25.6957	-0.1825	0	0.0001	FDR <= 0.01
1274	Q16531	Q16531;F5GY55;Q16531-2;F5H2L3;F5GZY8;F5GWI0;F5GYG8;F5H198	DNA damage-binding protein 1 OS=Homo sapiens OX=9606 GN=DDB1 PE=1 SV=1	39	39	354	cell organization and biogenesis;metabolic process;regulation of biological process;response to stimulus	cytoplasm;nucleus	DNA binding;protein binding	DDB1		Viral carcinogenesis; Ubiquitin mediated proteolysis; Nucleotide excision repair; Hepatitis B	Formation of Incision Complex in GG-NER; DNA Damage Recognition in GG-NER; Gap-filling DNA repair synthesis and ligation in TC-NER; Recognition of DNA damage by PCNA-containing replication complex; Dual incision in TC-NER; Formation of TC-NER Pre-Incision Complex; Dual Incision in GG-NER; Neddylation	25.5486	25.6128	-0.0642	0.0803	0.1383	FDR > 0.05	25.4926	25.6128	-0.1202	0.0057	0.0121	FDR <= 0.05
3101	Q5VY30	Q5VY30;P02753	Retinol-binding protein OS=Homo sapiens OX=9606 GN=RBP4 PE=1 SV=2	2	2	8	metabolic process;regulation of biological process;response to stimulus;transport	cytosol;extracellular	protein binding;transporter activity	RBP4	Sterol Regulatory Element-Binding Proteins (SREBP) signalling; Vitamin A and Carotenoid Metabolism			18.0891	18.6403	-0.5512	0.0001	0.0005	FDR <= 0.01	17.9654	18.6403	-0.675	0	0.0001	FDR <= 0.01
5452	Q8IVH4	A0A3B3ITP4;Q495G5;Q8IVH4;D6RIS5;A0A3B3IRG3	Methylmalonic aciduria type A protein, mitochondrial OS=Homo sapiens OX=9606 GN=MMAA PE=1 SV=1	7	7	34	metabolic process	mitochondrion;organelle lumen	catalytic activity;nucleotide binding	MMAA			Cobalamin (Cbl, vitamin B12) transport and metabolism; Defective MMAA causes methylmalonic aciduria type cblA; Propionyl-CoA catabolism; Defective MUT causes methylmalonic aciduria mut type	20.86	21.4097	-0.5497	0	0	FDR <= 0.01	21.1346	21.4097	-0.2751	0.0002	0.0006	FDR <= 0.01
5242	Q9H5Q4	Q9H5Q4	Dimethyladenosine transferase 2, mitochondrial OS=Homo sapiens OX=9606 GN=TFB2M PE=1 SV=1	4	4	22	cell organization and biogenesis;metabolic process;regulation of biological process	mitochondrion;organelle lumen	catalytic activity;RNA binding	TFB2M	Energy Metabolism; Mitochondrial Gene Expression		Mitochondrial transcription initiation; Transcriptional activation of mitochondrial biogenesis	19.0957	19.6158	-0.5201	0	0	FDR <= 0.01	19.5805	19.6158	-0.0352	0.397	0.4679	FDR > 0.05
1732	P30405	P30405;H0Y548;R4GN99;P30405-2	Peptidyl-prolyl cis-trans isomerase F, mitochondrial OS=Homo sapiens OX=9606 GN=PPIF PE=1 SV=1	8	5	53	cell death;cell organization and biogenesis;metabolic process;regulation of biological process;response to stimulus	membrane;mitochondrion;organelle lumen	catalytic activity;protein binding	PPIF		Toxoplasmosis; Calcium signaling pathway; Huntington's disease; Parkinson's disease; cGMP-PKG signaling pathway		20.3816	20.9308	-0.5492	0.0021	0.0068	FDR <= 0.01	21.0408	20.9308	0.1101	0.3971	0.4679	FDR > 0.05
8110	Q15029	Q15029;Q15029-3;Q15029-2;K7EP67;K7EJ74	116 kDa U5 small nuclear ribonucleoprotein component OS=Homo sapiens OX=9606 GN=EFTUD2 PE=1 SV=1	35	35	232	cell organization and biogenesis;metabolic process;response to stimulus	cytosol;membrane;nucleus;spliceosomal complex	catalytic activity;nucleotide binding;protein binding;RNA binding	EFTUD2	mRNA Processing	Spliceosome	mRNA Splicing - Major Pathway; mRNA Splicing - Minor Pathway	24.6095	24.5086	0.1009	0.0088	0.0222	FDR <= 0.05	24.4299	24.5086	-0.0787	0.0278	0.0475	FDR <= 0.05
4845	Q9UHG3	Q9UHG3;F8W8W4	Prenylcysteine oxidase 1 OS=Homo sapiens OX=9606 GN=PCYOX1 PE=1 SV=3	19	3	376	metabolic process;transport	membrane;vacuole	catalytic activity;transporter activity	PCYOX1		Terpenoid backbone biosynthesis		26.0579	26.0474	0.0105	0.6927	0.7649	FDR > 0.05	26.0223	26.0474	-0.0251	0.3559	0.427	FDR > 0.05
3471	Q6PEY2	Q6PEY2	Tubulin alpha-3E chain OS=Homo sapiens OX=9606 GN=TUBA3E PE=1 SV=2	16	1	1306	cell organization and biogenesis	cytoplasm;cytoskeleton;nucleus	catalytic activity;nucleotide binding;protein binding;structural molecule activity	TUBA3E	Pathogenic Escherichia coli infection; Parkin-Ubiquitin Proteasomal System pathway	Pathogenic Escherichia coli infection; Gap junction; Phagosome; Apoptosis	COPI-independent Golgi-to-ER retrograde traffic; COPI-dependent Golgi-to-ER retrograde traffic; Carboxyterminal post-translational modifications of tubulin; Cilium Assembly; Recruitment of NuMA to mitotic centrosomes; Translocation of GLUT4 to the plasma membrane; Microtubule-dependent trafficking of connexons from Golgi to the plasma membrane; Separation of Sister Chromatids; COPI-mediated anter…	17.5266	17.319	0.2076	0.1938	0.2833	FDR > 0.05	17.6113	17.319	0.2924	0.0809	0.1197	FDR > 0.05
332	J3KR97	Q9BTW9;J3KR97;Q9BTW9-4;Q9BTW9-5;A0A0J9YVR1;A0A0J9YWI5;I3L0V3;A0A0J9YXU4;I3L120;Q9BTW9-2	Tubulin-specific chaperone D OS=Homo sapiens OX=9606 GN=TBCD PE=1 SV=1	34	24	288	cell organization and biogenesis;metabolic process;regulation of biological process	cytoplasm	enzyme regulator activity;protein binding	TBCD				24.081	24.0372	0.0438	0.1129	0.1823	FDR > 0.05	24.1997	24.0372	0.1625	0.0002	0.0006	FDR <= 0.01
313	Q86YV5	Q86YV5	Inactive tyrosine-protein kinase PRAG1 OS=Homo sapiens OX=9606 GN=PRAG1 PE=1 SV=4	4	4	16	metabolic process		catalytic activity;nucleotide binding	SGK223; PRAG1				18.2553	18.8022	-0.5469	0.0001	0.0005	FDR <= 0.01	17.926	18.8022	-0.8762	0	0	FDR <= 0.01
5895	C9JA28	Q9UNL2-2;Q9UNL2;C9JA28;C9J365	Translocon-associated protein subunit gamma OS=Homo sapiens OX=9606 GN=SSR3 PE=1 SV=1	4	4	35	cell organization and biogenesis;transport	membrane						23.3491	23.8953	-0.5462	0	0.0002	FDR <= 0.01	23.5431	23.8953	-0.3521	0.0006	0.0017	FDR <= 0.01
4898	E7EQV3	P11940;E7EQV3;P11940-2;A0A087WTT1;E7ERJ7;Q9H361;H0YAR2;H0YAS6;H0YB75;H0YBN4;H0YAS7;H0YAP2;E5RGH3;E5RJB9;H0YB86;H0YC10;Q4VXU2;E5RH24;Q4VXU2-2;A0A6I8PS38;A0A6I8PLA1	Polyadenylate-binding protein OS=Homo sapiens OX=9606 GN=PABPC1 PE=1 SV=1	30	19	434	metabolic process;regulation of biological process	cytoplasm;cytosol;membrane;nucleus;spliceosomal complex	protein binding;RNA binding;translation regulator activity	PABPC1	Translation Factors; Endoderm Differentiation			26.1431	26.1013	0.0418	0.2468	0.3422	FDR > 0.05	26.2301	26.1013	0.1288	0.0049	0.0106	FDR <= 0.05
5345	P19021	P19021;P19021-2	Peptidyl-glycine alpha-amidating monooxygenase OS=Homo sapiens OX=9606 GN=PAM PE=1 SV=2	25	1	145	cell organization and biogenesis;metabolic process;regulation of biological process;response to stimulus;transport	cell surface;extracellular;membrane	catalytic activity;metal ion binding;protein binding	PAM				23.4556	24.0017	-0.546	0	0	FDR <= 0.01	23.2892	24.0017	-0.7125	0	0	FDR <= 0.01
4067	H0YFD6	H0YFD6;P40939;A0A2R8Y4F5;A0A2R8YG21;A0A2R8Y688;P40939-2	Trifunctional enzyme subunit alpha, mitochondrial OS=Homo sapiens OX=9606 GN=HADHA PE=1 SV=2	34	34	660								26.7512	27.2953	-0.544	0	0	FDR <= 0.01	27.2155	27.2953	-0.0798	0.0137	0.0259	FDR <= 0.05
5553	Q86UU1-2	Q86UU1-2;Q86UU1;Q86UU1-3;A0A087WZL0;A0A087WXY7;A0A087WTZ7	Isoform 2 of Pleckstrin homology-like domain family B member 1 OS=Homo sapiens OX=9606 GN=PHLDB1	41	40	262	metabolic process;regulation of biological process	cytoplasm	catalytic activity;nucleotide binding;protein binding	PHLDB1				23.8284	23.913	-0.0845	0.0091	0.0229	FDR <= 0.05	23.8129	23.913	-0.1001	0.0037	0.0084	FDR <= 0.01
5671	Q16352	Q16352	Alpha-internexin OS=Homo sapiens OX=9606 GN=INA PE=1 SV=2	11	9	178	cell differentiation;cell organization and biogenesis;development	cytoskeleton;membrane	structural molecule activity	INA				20.3515	20.8942	-0.5427	0	0.0002	FDR <= 0.01	20.4216	20.8942	-0.4727	0.0001	0.0003	FDR <= 0.01
4235	Q8TD19	Q8TD19;G3V459	Serine/threonine-protein kinase Nek9 OS=Homo sapiens OX=9606 GN=NEK9 PE=1 SV=2	29	29	212	cell division;cell organization and biogenesis;metabolic process	cytoplasm;cytosol;nucleus	catalytic activity;metal ion binding;nucleotide binding;protein binding	NEK9			Activation of NIMA Kinases NEK9, NEK6, NEK7; Nuclear Pore Complex (NPC) Disassembly	24.1309	24.0286	0.1023	0.0062	0.0167	FDR <= 0.05	24.0985	24.0286	0.0699	0.0361	0.0599	FDR > 0.05
6460	P11177	P11177;P11177-2;P11177-3;C9J634;F8WF02	Pyruvate dehydrogenase E1 component subunit beta, mitochondrial OS=Homo sapiens OX=9606 GN=PDHB PE=1 SV=3	12	12	184	metabolic process;regulation of biological process	mitochondrion;nucleus;organelle lumen	catalytic activity;protein binding	PDHB	Glycolysis and Gluconeogenesis	HIF-1 signaling pathway; Pyruvate metabolism; Glycolysis / Gluconeogenesis; Central carbon metabolism in cancer; Citrate cycle (TCA cycle); Metabolic pathways; Glucagon signaling pathway; Carbon metabolism	Regulation of pyruvate dehydrogenase (PDH) complex; Signaling by Retinoic Acid; Glyoxylate metabolism and glycine degradation	24.8288	25.3481	-0.5193	0	0	FDR <= 0.01	24.9165	25.3481	-0.4315	0	0	FDR <= 0.01
5944	Q9UQB8	Q9UQB8-5;Q9UQB8-4;Q9UQB8;Q9UQB8-3;Q9UQB8-2;Q9UQB8-6;I3L4C2;I3L327;I3L3J7;I3L0M4;B4DWA1;I3L3C5;I3L3C6;I3L2M4;I3L125;I3L526;I3L1C8;I3L113;I3L2J6	Brain-specific angiogenesis inhibitor 1-associated protein 2 OS=Homo sapiens OX=9606 GN=BAIAP2 PE=1 SV=1	15	15	67	cell differentiation;cell organization and biogenesis;regulation of biological process;response to stimulus	cytoplasm;cytoskeleton;cytosol;endoplasmic reticulum;Golgi;membrane	protein binding	BAIAP2	Regulation of Actin Cytoskeleton	Adherens junction; Regulation of actin cytoskeleton	Regulation of actin dynamics for phagocytic cup formation; VEGFA-VEGFR2 Pathway; RHO GTPases Activate WASPs and WAVEs	21.9923	22.5343	-0.542	0	0	FDR <= 0.01	22.122	22.5343	-0.4122	0	0	FDR <= 0.01
1750	A0A5F9ZGZ1	A0A5F9ZGZ1;A0A5F9ZI81;A0A5F9ZI56;A0A5F9ZHQ5;A0A5F9ZHJ6;A0A5F9ZGY1;A0A5F9ZH39;A0A5F9ZGS7;A0A5F9ZI15	Ankyrin-2 OS=Homo sapiens OX=9606 GN=ANK2 PE=1 SV=1	46	2	67								18.644	18.6159	0.0281	0.5398	0.6367	FDR > 0.05	19.5114	18.6159	0.8956	0	0	FDR <= 0.01
6372	P31948	P31948-2;P31948;P31948-3;F5H783;F5GXD8;H0YGI8	Stress-induced-phosphoprotein 1 OS=Homo sapiens OX=9606 GN=STIP1 PE=1 SV=1	40	40	433	response to stimulus	cytoplasm;cytosol;Golgi;nucleus	protein binding;RNA binding	STIP1		Prion diseases	HSP90 chaperone cycle for steroid hormone receptors (SHR)	27.3428	27.4233	-0.0805	0.103	0.1689	FDR > 0.05	27.2847	27.4233	-0.1386	0.0132	0.0251	FDR <= 0.05
1728	Q8N428	Q8N428;Q8N428-2	Polypeptide N-acetylgalactosaminyltransferase 16 OS=Homo sapiens OX=9606 GN=GALNT16 PE=1 SV=2	9	9	51	metabolic process	Golgi;membrane	catalytic activity;metal ion binding	GALNT16; GALNTL1		Metabolic pathways; Mucin type O-glycan biosynthesis	O-linked glycosylation of mucins	21.5541	22.0951	-0.541	0	0.0001	FDR <= 0.01	20.9579	22.0951	-1.1372	0	0	FDR <= 0.01											1.2087	-0.0495	1.048	0.0342	1.1194	0.1263	-1.2159	-0.9005	-1.3708	6
4523	Q8IZD0	Q8IZD0-2;Q8IZD0;J3KN99	Sterile alpha motif domain-containing protein 14 OS=Homo sapiens OX=9606 GN=SAMD14 PE=2 SV=2	2	2	8			protein binding	SAMD14				14.8003	15.3407	-0.5403	0.0013	0.0046	FDR <= 0.01	15.313	15.3407	-0.0276	0.8109	0.8478	FDR > 0.05
5481	P54136	P54136;P54136-2;E5RJM9;E5RH09	Arginine--tRNA ligase, cytoplasmic OS=Homo sapiens OX=9606 GN=RARS PE=1 SV=2	38	38	342	metabolic process	cytoplasm;cytosol;membrane;mitochondrion;nucleus	catalytic activity;nucleotide binding;protein binding;RNA binding	RARS	Amino Acid metabolism	Aminoacyl-tRNA biosynthesis	Cytosolic tRNA aminoacylation; SeMet incorporation into proteins	26.2095	26.3294	-0.1199	0.0051	0.014	FDR <= 0.05	26.2632	26.3294	-0.0662	0.0677	0.1029	FDR > 0.05
2944	P29536	P29536;P29536-2;Q9BV00	Leiomodin-1 OS=Homo sapiens OX=9606 GN=LMOD1 PE=1 SV=3	12	12	69	cell organization and biogenesis;regulation of biological process	cytoplasm;cytoskeleton;cytosol;membrane	protein binding	LMOD1			Smooth Muscle Contraction	21.5966	22.1347	-0.5382	0	0	FDR <= 0.01	21.0817	22.1347	-1.053	0	0	FDR <= 0.01											1.2161	0.0402	1.1066	-0.0602	1.1633	-0.0311	-1.1867	-1.1522	-1.096	6
2945	P24821	P24821-4;P24821;J3QSU6;P24821-2;F5H7V9;P24821-3;P24821-5;E9PC84;P24821-6;H0YGZ3	Tenascin OS=Homo sapiens OX=9606 GN=TNC PE=1 SV=3	33	33	172	cell communication;cell differentiation;cell organization and biogenesis;metabolic process;regulation of biological process;response to stimulus	extracellular;membrane;organelle lumen	protein binding	TNC	Focal Adhesion; TGF-beta Signaling Pathway; Amplification and Expansion of Oncogenic Pathways as Metastatic Traits; TGF-B Signaling in Thyroid Cells for Epithelial-Mesenchymal Transition; Focal Adhesion-PI3K-Akt-mTOR-signaling pathway	ECM-receptor interaction; MicroRNAs in cancer; PI3K-Akt signaling pathway; Focal adhesion	ECM proteoglycans; Post-translational protein phosphorylation; Integrin cell surface interactions; Regulation of Insulin-like Growth Factor (IGF) transport and uptake by Insulin-like Growth Factor Binding Proteins (IGFBPs); Syndecan interactions	22.8546	22.7566	0.098	0.0057	0.0154	FDR <= 0.05	22.9101	22.7566	0.1536	0.0004	0.0012	FDR <= 0.01																					Core matrisome	ECM Glycoproteins
3325	O60831	O60831;A6NP52	PRA1 family protein 2 OS=Homo sapiens OX=9606 GN=PRAF2 PE=1 SV=1	3	3	21	transport	endosome;membrane		PRAF2				22.9922	23.5304	-0.5382	0	0	FDR <= 0.01	23.1485	23.5304	-0.3819	0	0	FDR <= 0.01
7194	Q9GZV5	Q9GZV5;C9J038;C9JR84;C9JQS8;C9J337	WW domain-containing transcription regulator protein 1 OS=Homo sapiens OX=9606 GN=WWTR1 PE=1 SV=1	8	8	54	cell differentiation;cell division;cell organization and biogenesis;metabolic process;regulation of biological process;response to stimulus	cytoplasm;cytosol;nucleus	protein binding	WWTR1	Adipogenesis	Hippo signaling pathway -multiple species; Hippo signaling pathway	RUNX2 regulates osteoblast differentiation; Physiological factors; Signaling by Hippo; SMAD2/SMAD3:SMAD4 heterotrimer regulates transcription; YAP1- and WWTR1 (TAZ)-stimulated gene expression; PPARA activates gene expression; RUNX3 regulates YAP1-mediated transcription	20.6173	21.1548	-0.5375	0	0	FDR <= 0.01	21.3206	21.1548	0.1658	0.0009	0.0024	FDR <= 0.01
8179	P27797	P27797;K7EJB9;K7EL50	Calreticulin OS=Homo sapiens OX=9606 GN=CALR PE=1 SV=1	27	27	458	cell differentiation;cell organization and biogenesis;cellular homeostasis;metabolic process;regulation of biological process;response to stimulus;transport	cell surface;cytoplasm;cytosol;endoplasmic reticulum;extracellular;Golgi;membrane;nucleus;organelle lumen	DNA binding;metal ion binding;protein binding;RNA binding	CALR	Androgen receptor signaling pathway; Photodynamic therapy-induced unfolded protein response; Calcium Regulation in the Cardiac Cell	HTLV-I infection; Antigen processing and presentation; Protein processing in endoplasmic reticulum; Phagosome; Chagas disease (American trypanosomiasis)	Scavenging by Class F Receptors; Assembly of Viral Components at the Budding Site; ATF6 (ATF6-alpha) activates chaperone genes; Antigen Presentation: Folding, assembly and peptide loading of class I MHC; ER-Phagosome pathway; Calnexin/calreticulin cycle; Scavenging by Class A Receptors	28.3769	28.5083	-0.1314	0.0191	0.0423	FDR <= 0.05	28.4452	28.5083	-0.0632	0.197	0.2586	FDR > 0.05
5571	P23246	P23246;P23246-2;H0Y9K7;H0Y9U2	Splicing factor, proline- and glutamine-rich OS=Homo sapiens OX=9606 GN=SFPQ PE=1 SV=2	27	26	332	cell organization and biogenesis;defense response;metabolic process;regulation of biological process;response to stimulus	chromosome;cytoplasm;nucleus	DNA binding;protein binding;RNA binding	SFPQ	mRNA Processing		PTK6 Regulates Proteins Involved in RNA Processing	25.9998	25.9378	0.0619	0.0533	0.0988	FDR > 0.05	25.7258	25.9378	-0.212	0.0001	0.0002	FDR <= 0.01
5391	Q15019	Q15019-2;Q15019;Q15019-3;C9J938;C9JB25;C9IZU3;C9JZI2;C9JQJ4;A0A1B0GXJ2;C9JFT1;F8WB65;C9JSE7;C9JT15	Septin-2 OS=Homo sapiens OX=9606 GN=SEPTIN2 PE=1 SV=1	21	1	495	cell differentiation;cell division;cell organization and biogenesis;regulation of biological process;response to stimulus	chromosome;cytoplasm;cytoskeleton;cytosol;membrane;nucleus	nucleotide binding;protein binding	SEPT2		Bacterial invasion of epithelial cells	Anchoring of the basal body to the plasma membrane	26.3408	26.4866	-0.1459	0.0038	0.011	FDR <= 0.05	26.5819	26.4866	0.0953	0.0301	0.0509	FDR > 0.05
667	Q07866-7	Q07866-7;Q07866-4;Q07866-6;G3V5R9;Q07866-9	Isoform P of Kinesin light chain 1 OS=Homo sapiens OX=9606 GN=KLC1	37	1	278	cell organization and biogenesis;cellular component movement;transport	cytosol;membrane	catalytic activity;motor activity;protein binding	KLC1				25.8618	25.9468	-0.085	0.0108	0.0263	FDR <= 0.05	25.9276	25.9468	-0.0192	0.4773	0.5449	FDR > 0.05
7778	P09960	P09960;P09960-4;P09960-2;P09960-3;B4DEH5	Leukotriene A-4 hydrolase OS=Homo sapiens OX=9606 GN=LTA4H PE=1 SV=2	27	27	306	metabolic process;transport	cytoplasm;cytosol;extracellular;nucleus	catalytic activity;metal ion binding;protein binding;RNA binding	LTA4H	Eicosanoid Synthesis	Metabolic pathways; Arachidonic acid metabolism	Synthesis of Leukotrienes (LT) and Eoxins (EX); Neutrophil degranulation	25.8369	25.8824	-0.0455	0.1435	0.2214	FDR > 0.05	25.7077	25.8824	-0.1747	0.0003	0.0009	FDR <= 0.01
4403	Q01459	Q01459	Di-N-acetylchitobiase OS=Homo sapiens OX=9606 GN=CTBS PE=1 SV=1	5	5	31	metabolic process	vacuole	catalytic activity	CTBS				20.7458	21.2819	-0.536	0	0.0001	FDR <= 0.01	20.6888	21.2819	-0.5931	0	0	FDR <= 0.01
4484	P30153	P30153;B3KQV6;C9J9C1;E9PH38	Serine/threonine-protein phosphatase 2A 65 kDa regulatory subunit A alpha isoform OS=Homo sapiens OX=9606 GN=PPP2R1A PE=1 SV=4	27	21	406	cell death;cell organization and biogenesis;metabolic process;regulation of biological process;response to stimulus	chromosome;cytoplasm;cytoskeleton;cytosol;membrane;mitochondrion;nucleus	catalytic activity;enzyme regulator activity;protein binding	PPP2R1A	Focal Adhesion-PI3K-Akt-mTOR-signaling pathway; Wnt Signaling Pathway and Pluripotency; Glycogen Metabolism	mRNA surveillance pathway; Adrenergic signaling in cardiomyocytes; TGF-beta signaling pathway; PI3K-Akt signaling pathway; Oocyte meiosis; AMPK signaling pathway; Tight junction; Dopaminergic synapse; Hepatitis C; Sphingolipid signaling pathway; Long-term depression; Hippo signaling pathway; Chagas disease (American trypanosomiasis)	Glycolysis; Regulation of PLK1 Activity at G2/M Transition; AXIN missense mutants destabilize the destruction complex; PP2A-mediated dephosphorylation of key metabolic factors; APC truncation mutants have impaired AXIN binding; CTLA4 inhibitory signaling; Activated TLR4 signalling; Separation of Sister Chromatids; MASTL Facilitates Mitotic Progression; S37 mutants of beta-catenin aren't phosphory…	25.8472	25.7862	0.061	0.0779	0.1349	FDR > 0.05	25.7846	25.7862	-0.0016	0.9599	0.968	FDR > 0.05
26	P45974	P45974-2;P45974;F5H571	Ubiquitin carboxyl-terminal hydrolase 5 OS=Homo sapiens OX=9606 GN=USP5 PE=1 SV=2	30	28	336	metabolic process;regulation of biological process	cytosol;vacuole	catalytic activity;metal ion binding;protein binding	USP5			Synthesis of active ubiquitin: roles of E1 and E2 enzymes; Ub-specific processing proteases	25.6373	25.6139	0.0234	0.4183	0.5206	FDR > 0.05	25.4443	25.6139	-0.1696	0.0003	0.0009	FDR <= 0.01
2127	P11182	P11182;Q5VVL7	Lipoamide acyltransferase component of branched-chain alpha-keto acid dehydrogenase complex, mitochondrial OS=Homo sapiens OX=9606 GN=DBT PE=1 SV=3	10	10	53	metabolic process	mitochondrion;organelle lumen	catalytic activity;protein binding	DBT		Valine, leucine and isoleucine degradation; Propanoate metabolism; Metabolic pathways	Branched-chain amino acid catabolism; Glyoxylate metabolism and glycine degradation	21.6998	22.2348	-0.5351	0	0	FDR <= 0.01	21.9198	22.2348	-0.315	0	0.0001	FDR <= 0.01
5405	P49747	P49747;G3XAP6;P49747-2	Cartilage oligomeric matrix protein OS=Homo sapiens OX=9606 GN=COMP PE=1 SV=2	5	5	21	cell death;cell organization and biogenesis;regulation of biological process	extracellular	metal ion binding;protein binding;structural molecule activity	COMP	Focal Adhesion; Focal Adhesion-PI3K-Akt-mTOR-signaling pathway	Phagosome; Malaria; ECM-receptor interaction; Focal adhesion; PI3K-Akt signaling pathway	ECM proteoglycans; Integrin cell surface interactions	19.2408	19.7742	-0.5334	0	0.0001	FDR <= 0.01	19.4588	19.7742	-0.3154	0.0002	0.0008	FDR <= 0.01																					Core matrisome	ECM Glycoproteins
1442	Q9UH65	Q9UH65;E7EMB1;E9PJM7;E9PJK8	Switch-associated protein 70 OS=Homo sapiens OX=9606 GN=SWAP70 PE=1 SV=1	32	32	204	cell organization and biogenesis;cellular homeostasis;metabolic process;regulation of biological process	cytoplasm;cytoskeleton;membrane;nucleus	DNA binding;metal ion binding;nucleotide binding;protein binding	SWAP70				25.1633	25.068	0.0953	0.0109	0.0266	FDR <= 0.05	25.2355	25.068	0.1674	0.0004	0.0013	FDR <= 0.01
7348	O00754	O00754;O00754-2;M0QZ24;M0R2P5	Lysosomal alpha-mannosidase OS=Homo sapiens OX=9606 GN=MAN2B1 PE=1 SV=3	23	23	170	metabolic process;transport	extracellular;organelle lumen;vacuole	catalytic activity;metal ion binding	MAN2B1		Lysosome; Other glycan degradation	Neutrophil degranulation; Lysosomal oligosaccharide catabolism	23.1339	23.6672	-0.5333	0	0	FDR <= 0.01	22.7737	23.6672	-0.8935	0	0	FDR <= 0.01
3179	A0A499FIX8	A0FGR8-2;A0A499FIX8;H7BXI1;A0FGR8;A0A087WXU3;A0FGR8-6;A0FGR8-4;A0FGR8-5	Extended synaptotagmin-2 OS=Homo sapiens OX=9606 GN=ESYT2 PE=1 SV=1	30	30	257								24.8746	24.8532	0.0215	0.3957	0.499	FDR > 0.05	24.7213	24.8532	-0.1319	0.0006	0.0017	FDR <= 0.01
5226	Q13011	Q13011;M0R248;M0QZW4;M0QXS7	Delta(3,5)-Delta(2,4)-dienoyl-CoA isomerase, mitochondrial OS=Homo sapiens OX=9606 GN=ECH1 PE=1 SV=2	11	11	135	metabolic process	membrane;mitochondrion	catalytic activity;protein binding	ECH1	Fatty Acid Biosynthesis	Peroxisome		23.046	23.5793	-0.5333	0	0	FDR <= 0.01	22.9836	23.5793	-0.5957	0	0	FDR <= 0.01
5946	A6NHR9	A6NHR9;A6NHR9-2;J3KTL8;A6NHR9-3;A0A2R8YCU7;J3QSH1;J3KRK8	Structural maintenance of chromosomes flexible hinge domain-containing protein 1 OS=Homo sapiens OX=9606 GN=SMCHD1 PE=1 SV=2	48	48	215	cell organization and biogenesis;regulation of biological process	chromosome	catalytic activity;nucleotide binding;protein binding	SMCHD1				23.9453	23.8951	0.0502	0.0523	0.0974	FDR > 0.05	23.8168	23.8951	-0.0783	0.0075	0.0154	FDR <= 0.05
5872	Q8NCM8	Q8NCM8-2;Q8NCM8;A0A3B3ISP9;Q8NCM8-3;A0A3B3IT36;H0YEX1	Cytoplasmic dynein 2 heavy chain 1 OS=Homo sapiens OX=9606 GN=DYNC2H1 PE=1 SV=4	47	47	192	cell differentiation;cell organization and biogenesis;cellular component movement;development;metabolic process;regulation of biological process;transport	cytoplasm;cytoskeleton;Golgi;membrane	catalytic activity;motor activity;nucleotide binding;protein binding	DYNC2H1		Vasopressin-regulated water reabsorption; Phagosome; Salmonella infection	Hedgehog 'off' state; Intraflagellar transport	23.1021	23.0791	0.023	0.4105	0.5137	FDR > 0.05	23.0238	23.0791	-0.0552	0.0704	0.1064	FDR > 0.05
5135	Q15477	Q15477;H7C5N0;H7C4L3;B4E0B4	Helicase SKI2W OS=Homo sapiens OX=9606 GN=SKIV2L PE=1 SV=3	36	35	237	metabolic process	cytoplasm;cytosol;nucleus	catalytic activity;nucleotide binding;RNA binding	SKIV2L		RNA degradation	mRNA decay by 3' to 5' exoribonuclease; Association of TriC/CCT with target proteins during biosynthesis	24.0708	24.0411	0.0296	0.2756	0.3739	FDR > 0.05	23.9561	24.0411	-0.0851	0.0099	0.0196	FDR <= 0.05
3669	A0A0A0MRA8	A0A0A0MRA8;Q9Y2J2-2;Q9Y2J2-4;Q9Y2J2;A8K968;A0A0A0MSA4;Q9Y2J2-3;A0A1B0GTF8;A0A0J9YY18;A0A0J9YW31;A0A0J9YW26;J3KT37;J3QS55;A0A0J9YWE1;J3QR33;J3QKK4;J3QRQ6;J3QKY2;J3KS70;J3QLU5;J3KRD1;J3QS83;A0A0J9YWS4;A0A0J9YWN0	Band 4.1-like protein 3 OS=Homo sapiens OX=9606 GN=EPB41L3 PE=1 SV=1	34	27	231	cell death;cell organization and biogenesis;regulation of biological process	cytoskeleton;cytosol;membrane	protein binding;structural molecule activity	EPB41L3				25.2908	25.1411	0.1497	0.2455	0.3407	FDR > 0.05	23.3051	25.1411	-1.836	0	0	FDR <= 0.01											0.6107	0.7397	0.568	0.7547	0.5625	0.7106	-1.6535	-1.1889	-1.1039	4
3810	Q4U2R6	Q4U2R6	39S ribosomal protein L51, mitochondrial OS=Homo sapiens OX=9606 GN=MRPL51 PE=1 SV=1	3	3	20	cell organization and biogenesis;metabolic process	membrane;mitochondrion;ribosome	protein binding;structural molecule activity	MRPL51			Mitochondrial translation initiation; Mitochondrial translation elongation; Mitochondrial translation termination	20.5179	21.0509	-0.533	0	0.0002	FDR <= 0.01	20.7639	21.0509	-0.287	0.0012	0.0033	FDR <= 0.01
4894	Q6PKG0	Q6PKG0;Q6PKG0-3;A0A0B4J210;E5RH50;H0YBW1;H0YC33;H0YBM7;H0YC73;H0YAN4;H0YBJ5	La-related protein 1 OS=Homo sapiens OX=9606 GN=LARP1 PE=1 SV=2	40	36	233	cell proliferation;metabolic process;regulation of biological process;response to stimulus	cytoplasm;membrane	protein binding;RNA binding;translation regulator activity	LARP1				25.1179	25.0364	0.0815	0.0056	0.0152	FDR <= 0.05	25.1653	25.0364	0.1289	0.0003	0.0011	FDR <= 0.01
4747	Q9Y5X1	Q9Y5X1	Sorting nexin-9 OS=Homo sapiens OX=9606 GN=SNX9 PE=1 SV=1	24	24	355	cell division;cell organization and biogenesis;regulation of biological process;transport	cytoplasm;cytosol;Golgi;membrane	protein binding	SNX9			Golgi Associated Vesicle Biogenesis; Clathrin-mediated endocytosis	26.0106	25.976	0.0347	0.2258	0.3195	FDR > 0.05	26.5509	25.976	0.5749	0	0	FDR <= 0.01
5709	O94901-9	O94901-9;E9PHI4;O94901;O94901-8;O94901-5;O94901-6;H0Y742;H0Y6N5;H7C2K3;O94901-3;O94901-2;O94901-7;C9JK55;H7C019;C9K051;O94901-4;C9JJU6;C9JR15;C9JS54;H7C3X3	Isoform 9 of SUN domain-containing protein 1 OS=Homo sapiens OX=9606 GN=SUN1	30	29	213	cell organization and biogenesis;cellular component movement;response to stimulus;transport	membrane	protein binding	SUN1				24.4488	24.4905	-0.0417	0.1547	0.2358	FDR > 0.05	24.0746	24.4905	-0.416	0	0	FDR <= 0.01
6887	Q8N183	Q8N183;D6RA56	NADH dehydrogenase [ubiquinone] 1 alpha subcomplex assembly factor 2 OS=Homo sapiens OX=9606 GN=NDUFAF2 PE=1 SV=1	9	9	51	cell organization and biogenesis;metabolic process;regulation of biological process	membrane;mitochondrion	catalytic activity	NDUFAF2			Complex I biogenesis	22.4076	22.94	-0.5325	0	0	FDR <= 0.01	22.6791	22.94	-0.261	0	0.0001	FDR <= 0.01
725	P49257	P49257	Protein ERGIC-53 OS=Homo sapiens OX=9606 GN=LMAN1 PE=1 SV=2	22	22	242	cell organization and biogenesis;coagulation;metabolic process;regulation of biological process;transport	endoplasmic reticulum;Golgi;membrane	metal ion binding;protein binding	LMAN1	Complement and Coagulation Cascades	Protein processing in endoplasmic reticulum	Cargo concentration in the ER; COPII (Coat Protein 2) Mediated Vesicle Transport	25.7502	26.2819	-0.5317	0	0	FDR <= 0.01	25.8987	26.2819	-0.3832	0	0.0001	FDR <= 0.01																					Matrisome-associated	ECM-affiliated Proteins
3184	H0Y3P2	D3DQV9;H0Y3P2;P78344-2;P78344;H0YCH5;H0YD77;H0YEC5;E9PKF8;H0YCF8;H0YDC0;H0YEN8;H0YE22;H0YD99;H0YEI7;H0YE44	Eukaryotic translation initiation factor 4 gamma 2 OS=Homo sapiens OX=9606 GN=EIF4G2 PE=1 SV=1	34	34	306			protein binding;RNA binding					25.2719	25.2557	0.0163	0.6595	0.7379	FDR > 0.05	25.2502	25.2557	-0.0055	0.8814	0.9046	FDR > 0.05
7981	Q9H3S7	Q9H3S7;C9JD91;R4GMM7	Tyrosine-protein phosphatase non-receptor type 23 OS=Homo sapiens OX=9606 GN=PTPN23 PE=1 SV=1	39	39	250	cell organization and biogenesis;metabolic process;regulation of biological process;transport	cytoplasm;cytoskeleton;cytosol;endosome;nucleus	catalytic activity;protein binding	PTPN23				24.2378	24.1564	0.0814	0.016	0.0366	FDR <= 0.05	24.3016	24.1564	0.1452	0.0006	0.0019	FDR <= 0.01
6918	O43143	O43143	Pre-mRNA-splicing factor ATP-dependent RNA helicase DHX15 OS=Homo sapiens OX=9606 GN=DHX15 PE=1 SV=2	31	30	341	metabolic process;response to stimulus	cytoplasm;nucleus;spliceosomal complex	catalytic activity;nucleotide binding;protein binding;RNA binding	DHX15	mRNA Processing	Spliceosome	mRNA Splicing - Major Pathway	24.8424	24.807	0.0354	0.1426	0.2202	FDR > 0.05	24.7502	24.807	-0.0569	0.031	0.0524	FDR > 0.05
1131	P12110	P12110	Collagen alpha-2(VI) chain OS=Homo sapiens OX=9606 GN=COL6A2 PE=1 SV=4	33	4	341	cell organization and biogenesis;metabolic process;response to stimulus	extracellular;membrane;organelle lumen	protein binding	COL6A2	miRNA targets in ECM and membrane receptors; Focal Adhesion; Focal Adhesion-PI3K-Akt-mTOR-signaling pathway	Protein digestion and absorption; ECM-receptor interaction; PI3K-Akt signaling pathway; Focal adhesion	ECM proteoglycans; Collagen degradation; Integrin cell surface interactions; Assembly of collagen fibrils and other multimeric structures; Collagen chain trimerization; NCAM1 interactions; Signaling by PDGF	26.1753	26.1526	0.0227	0.5406	0.6374	FDR > 0.05	26.3161	26.1526	0.1635	0.0018	0.0045	FDR <= 0.01																					Core matrisome	Collagens
2177	Q8IWE2	Q8IWE2;Q8IWE2-2	Protein NOXP20 OS=Homo sapiens OX=9606 GN=FAM114A1 PE=1 SV=2	23	23	181		cytoplasm;cytosol;Golgi;nucleus	protein binding	FAM114A1				25.5528	25.5764	-0.0236	0.6569	0.7361	FDR > 0.05	25.4861	25.5764	-0.0903	0.1155	0.1631	FDR > 0.05
3860	Q13263	Q13263;Q13263-2;M0R0K9;M0R3C0;M0R2I3	Transcription intermediary factor 1-beta OS=Homo sapiens OX=9606 GN=TRIM28 PE=1 SV=5	28	28	286	cell organization and biogenesis;defense response;metabolic process;regulation of biological process;response to stimulus	chromosome;nucleus	catalytic activity;DNA binding;metal ion binding;protein binding;RNA binding	TRIM28	Corticotropin-releasing hormone signaling pathway; Mesodermal Commitment Pathway; ATM Signaling Network in Development and Disease		Generic Transcription Pathway	25.143	25.1661	-0.0231	0.3945	0.4977	FDR > 0.05	24.9875	25.1661	-0.1786	0.0001	0.0005	FDR <= 0.01
5688	M0QXB5	O95571;M0QXB5;M0QY80	Persulfide dioxygenase ETHE1, mitochondrial OS=Homo sapiens OX=9606 GN=ETHE1 PE=1 SV=1	10	10	66	metabolic process	cytoplasm;mitochondrion;organelle lumen	catalytic activity;metal ion binding	ETHE1				23.4197	23.9493	-0.5296	0	0	FDR <= 0.01	24.3016	23.9493	0.3523	0	0	FDR <= 0.01
7653	Q15233	Q15233;Q15233-2;C9JYS8;H7C367;C9IZL7;C9J4X2	Non-POU domain-containing octamer-binding protein OS=Homo sapiens OX=9606 GN=NONO PE=1 SV=4	26	23	336	defense response;metabolic process;regulation of biological process;response to stimulus	membrane;nucleus	DNA binding;protein binding;RNA binding	NONO	mRNA Processing			24.8712	24.8455	0.0257	0.2721	0.3702	FDR > 0.05	24.7114	24.8455	-0.1341	0.0003	0.0009	FDR <= 0.01
1157	Q8TDZ2	Q8TDZ2;Q8TDZ2-4;Q8TDZ2-2;Q8TDZ2-3;Q5TED7;H0Y6Z4	[F-actin]-monooxygenase MICAL1 OS=Homo sapiens OX=9606 GN=MICAL1 PE=1 SV=2	31	30	222	cell organization and biogenesis;coagulation;metabolic process;regulation of biological process;response to stimulus	cytoplasm;cytoskeleton;cytosol	catalytic activity;metal ion binding;nucleotide binding;protein binding	MICAL1			Factors involved in megakaryocyte development and platelet production	24.0601	24.0768	-0.0167	0.5161	0.6153	FDR > 0.05	24.2148	24.0768	0.138	0.0005	0.0015	FDR <= 0.01
2730	A0A1W2PQ51	A0A1W2PQ51;Q92841;A0A1X7SBZ2;Q92841-3;Q92841-1;Q92841-2;A0A5H1ZRQ2;A0A0U1RQJ0	Probable ATP-dependent RNA helicase DDX17 OS=Homo sapiens OX=9606 GN=DDX17 PE=1 SV=1	36	28	318	cell differentiation;cell organization and biogenesis;defense response;metabolic process;regulation of biological process;response to stimulus	cytoplasm;cytosol;membrane;nucleus	catalytic activity;nucleotide binding;protein binding;RNA binding	DDX17	RIG-I-like Receptor Signaling			25.9115	25.8896	0.022	0.4524	0.5551	FDR > 0.05	25.8058	25.8896	-0.0838	0.0169	0.031	FDR <= 0.05
6378	Q9P2E9	Q9P2E9;A0A087WVV2;A2A2S5;V9GY78	Ribosome-binding protein 1 OS=Homo sapiens OX=9606 GN=RRBP1 PE=1 SV=5	101	43	1484								27.3639	27.8917	-0.5278	0	0	FDR <= 0.01	27.6757	27.8917	-0.216	0.0002	0.0007	FDR <= 0.01
2120	O15460	O15460;O15460-2;E7ENX0;E7EPI9;E7ERI1;A8MXE0;C9JX45;C9JCP0;C9JN43;C9JIG4	Prolyl 4-hydroxylase subunit alpha-2 OS=Homo sapiens OX=9606 GN=P4HA2 PE=1 SV=1	22	22	180	metabolic process	cytosol;endoplasmic reticulum;organelle lumen	catalytic activity;metal ion binding;protein binding	P4HA2	Amino Acid metabolism	Metabolic pathways; Arginine and proline metabolism	Collagen biosynthesis and modifying enzymes	24.5627	25.0903	-0.5276	0	0	FDR <= 0.01	24.5728	25.0903	-0.5175	0	0	FDR <= 0.01																					Matrisome-associated	ECM Regulators
7828	P07384	P07384;E9PRM1;E9PL37;E9PJA6;E9PQB3;E9PMC6;E9PLX0;E9PJJ3;E9PLC9;E9PSA6;E9PIA9	Calpain-1 catalytic subunit OS=Homo sapiens OX=9606 GN=CAPN1 PE=1 SV=1	30	30	377	cell death;cell organization and biogenesis;metabolic process;regulation of biological process;transport	cytoplasm;cytosol;extracellular;membrane;mitochondrion;vacuole	catalytic activity;metal ion binding;protein binding	CAPN1	Integrin-mediated Cell Adhesion; Alzheimers Disease; Focal Adhesion	Apoptosis; Alzheimer's disease; Protein processing in endoplasmic reticulum	Degradation of the extracellular matrix; Formation of the cornified envelope; Neutrophil degranulation; Deregulated CDK5 triggers multiple neurodegenerative pathways in Alzheimer's disease models	26.0111	25.9976	0.0135	0.5663	0.6579	FDR > 0.05	26.2786	25.9976	0.2809	0	0	FDR <= 0.01
7655	Q8NEU8	Q8NEU8;Q8NEU8-2;Q8NEU8-3;F8VXB0;H0YH86;F8VWV2;F8W124	DCC-interacting protein 13-beta OS=Homo sapiens OX=9606 GN=APPL2 PE=1 SV=3	26	26	244	cell proliferation;regulation of biological process;response to stimulus	cytoplasm;endosome;membrane;nucleus	protein binding	APPL2				24.405	24.3747	0.0303	0.2048	0.2959	FDR > 0.05	24.1946	24.3747	-0.1801	0	0.0002	FDR <= 0.01
4503	P12110-2	P12110-2	Isoform 2C2A of Collagen alpha-2(VI) chain OS=Homo sapiens OX=9606 GN=COL6A2	31	2	323	cell organization and biogenesis;metabolic process;response to stimulus	extracellular;membrane;organelle lumen	protein binding	COL6A2	miRNA targets in ECM and membrane receptors; Focal Adhesion; Focal Adhesion-PI3K-Akt-mTOR-signaling pathway			19.1072	19.5184	-0.4113	0.1529	0.2337	FDR > 0.05	19.8124	19.5184	0.294	0.2916	0.3616	FDR > 0.05
2793	Q13618	Q13618;Q13618-2;Q13618-3;A0A087WTG3;H7C1L6;H7C399;A0A087X1R9	Cullin-3 OS=Homo sapiens OX=9606 GN=CUL3 PE=1 SV=2	37	36	219	cell death;cell division;cell organization and biogenesis;cellular component movement;metabolic process;regulation of biological process;response to stimulus;transport	cytoplasm;cytosol;Golgi;membrane;nucleus	catalytic activity;protein binding	CUL3		Hedgehog signaling pathway; Ubiquitin mediated proteolysis	Hedgehog 'on' state; Regulation of RAS by GAPs; Degradation of DVL; Antigen processing: Ubiquitination & Proteasome degradation; Neddylation; Interleukin-20 family signaling	24.3862	24.4971	-0.1109	0.0078	0.02	FDR <= 0.05	24.3432	24.4971	-0.1539	0.0012	0.0032	FDR <= 0.01
6817	Q9NZB2	Q9NZB2;Q9NZB2-6;Q9NZB2-4;Q9NZB2-5;Q9NZB2-2;A0A0C4DH52;A0A0C4DG79;A0A494C0Y9;Q5T035	Constitutive coactivator of PPAR-gamma-like protein 1 OS=Homo sapiens OX=9606 GN=FAM120A PE=1 SV=2	33	31	261		cytoplasm;cytosol;membrane;nucleus	RNA binding	FAM120A				23.9038	24.0265	-0.1227	0.0061	0.0163	FDR <= 0.05	24.1926	24.0265	0.1661	0.001	0.0029	FDR <= 0.01
144	Q9UBS4	Q9UBS4;H7C2Y5	DnaJ homolog subfamily B member 11 OS=Homo sapiens OX=9606 GN=DNAJB11 PE=1 SV=1	7	7	52	metabolic process;regulation of biological process	cytoplasm;endoplasmic reticulum;membrane;nucleus;organelle lumen	protein binding	DNAJB11	Photodynamic therapy-induced unfolded protein response	Protein processing in endoplasmic reticulum	XBP1(S) activates chaperone genes	22.5308	23.0569	-0.5261	0	0.0001	FDR <= 0.01	22.8113	23.0569	-0.2456	0.0014	0.0037	FDR <= 0.01
1563	A0A2R8YCH5	A0A2R8Y5A3;B4DGU4;A0A2R8YCH5;P35222;A0A2R8Y543;A0A2R8Y804;A0A2R8Y5Z1;A0A2R8Y7Z0;A0A2R8Y5C3;A0A2R8Y750;A0A2R8Y6G0;E7EMJ5;A0A2R8YG06;A0A2R8Y815	Catenin beta-1 (Fragment) OS=Homo sapiens OX=9606 GN=CTNNB1 PE=1 SV=1	26	23	228								24.8931	24.8553	0.0378	0.369	0.4709	FDR > 0.05	24.6823	24.8553	-0.173	0.0024	0.0058	FDR <= 0.01
6467	P55084	P55084;P55084-2;F5GZQ3;B5MD38;C9JEY0;C9JE81;C9K0M0	Trifunctional enzyme subunit beta, mitochondrial OS=Homo sapiens OX=9606 GN=HADHB PE=1 SV=3	19	18	389	metabolic process	endoplasmic reticulum;membrane;mitochondrion	catalytic activity;protein binding;RNA binding	HADHB	Fatty Acid Beta Oxidation; Valproic acid pathway; Sudden Infant Death Syndrome (SIDS) Susceptibility Pathways	Fatty acid metabolism; Metabolic pathways; Fatty acid degradation; Valine, leucine and isoleucine degradation; Fatty acid elongation	Beta oxidation of hexanoyl-CoA to butanoyl-CoA; Beta oxidation of lauroyl-CoA to decanoyl-CoA-CoA; Beta oxidation of palmitoyl-CoA to myristoyl-CoA; Beta oxidation of myristoyl-CoA to lauroyl-CoA; Acyl chain remodeling of CL; Beta oxidation of decanoyl-CoA to octanoyl-CoA-CoA; mitochondrial fatty acid beta-oxidation of unsaturated fatty acids; Beta oxidation of octanoyl-CoA to hexanoyl-CoA	25.946	26.4715	-0.5255	0	0	FDR <= 0.01	26.3901	26.4715	-0.0814	0.0746	0.1117	FDR > 0.05
6880	Q92791	Q92791;K7ERA3;K7EJ03	Endoplasmic reticulum protein SC65 OS=Homo sapiens OX=9606 GN=P3H4 PE=1 SV=1	8	8	125	cell organization and biogenesis;metabolic process	chromosome;endoplasmic reticulum	protein binding	LEPREL4; P3H4				22.6271	23.1526	-0.5255	0	0	FDR <= 0.01	22.7462	23.1526	-0.4064	0	0	FDR <= 0.01
3233	Q63ZY3	Q63ZY3-3;Q63ZY3;Q63ZY3-2;K7EIU4;K7ERU2;K7ES05	KN motif and ankyrin repeat domain-containing protein 2 OS=Homo sapiens OX=9606 GN=KANK2 PE=1 SV=1	29	29	197	cell death;metabolic process;regulation of biological process	cytoplasm;mitochondrion	protein binding	KANK2				24.4919	24.4757	0.0162	0.6267	0.7104	FDR > 0.05	25.2801	24.4757	0.8044	0	0	FDR <= 0.01
5575	Q01518	Q01518;Q01518-2;Q5T0R1;Q5T0R4;Q5T0R2;Q5T0R3;Q5T0R5;Q5T0R7;Q5T0R6;Q5T0R9;Q5T0S3;Q5T0R8	Adenylyl cyclase-associated protein 1 OS=Homo sapiens OX=9606 GN=CAP1 PE=1 SV=5	26	24	608	cell organization and biogenesis;cellular component movement;regulation of biological process;response to stimulus;transport	cytoplasm;cytoskeleton;extracellular;membrane;organelle lumen	protein binding	CAP1	Angiopoietin Like Protein 8 Regulatory Pathway; Insulin Signaling		Platelet degranulation ; Neutrophil degranulation; Role of ABL in ROBO-SLIT signaling	27.0204	26.8865	0.1339	0.0116	0.0279	FDR <= 0.05	27.3019	26.8865	0.4154	0	0.0001	FDR <= 0.01
1672	Q14669-2	Q14669-2;Q14669;Q14669-3;Q14669-4;H7C2Y1;G5E9G6;C9JLD7;C9JSX9;C9JLJ5	Isoform 2 of E3 ubiquitin-protein ligase TRIP12 OS=Homo sapiens OX=9606 GN=TRIP12	40	40	206	metabolic process;regulation of biological process;response to stimulus	cytoplasm;cytosol;nucleus	catalytic activity;protein binding	TRIP12				22.8157	22.7639	0.0518	0.0705	0.1244	FDR > 0.05	22.9502	22.7639	0.1863	0.0001	0.0003	FDR <= 0.01
7948	P35527	P35527;K7EQQ3	Keratin, type I cytoskeletal 9 OS=Homo sapiens OX=9606 GN=KRT9 PE=1 SV=3	23	21	220	cell death;cell organization and biogenesis	cytosol;membrane;nucleus	structural molecule activity	KRT9			Formation of the cornified envelope	24.8657	25.4757	-0.6099	0.1851	0.2729	FDR > 0.05	25.4151	25.4757	-0.0605	0.8891	0.9111	FDR > 0.05
7948	P35527	P35527;K7EQQ3	SWISS-PROT:P35527 Tax_Id=9606 Gene_Symbol=KRT9 Keratin, type I cytoskeletal 9	21	20	193	cell death;cell organization and biogenesis	cytosol;membrane;nucleus	structural molecule activity	KRT9				24.8657	25.4757	-0.6099	0.1851	0.2729	FDR > 0.05	25.4151	25.4757	-0.0605	0.8891	0.9111	FDR > 0.05
1152	P50991	P50991;P50991-2	T-complex protein 1 subunit delta OS=Homo sapiens OX=9606 GN=CCT4 PE=1 SV=4	27	26	319	metabolic process;regulation of biological process;transport	cytoplasm;cytoskeleton;cytosol	nucleotide binding;protein binding;RNA binding	CCT4			BBSome-mediated cargo-targeting to cilium; Prefoldin mediated transfer of substrate to CCT/TriC; Cooperation of PDCL (PhLP1) and TRiC/CCT in G-protein beta folding; Association of TriC/CCT with target proteins during biosynthesis; Formation of tubulin folding intermediates by CCT/TriC; Folding of actin by CCT/TriC	26.363	26.2734	0.0896	0.0471	0.089	FDR > 0.05	26.2751	26.2734	0.0016	0.9668	0.9735	FDR > 0.05
4599	Q9H2M9	Q9H2M9;Q9H2M9-2;H7C4Y9;F8WDJ2	Rab3 GTPase-activating protein non-catalytic subunit OS=Homo sapiens OX=9606 GN=RAB3GAP2 PE=1 SV=1	38	38	279	regulation of biological process;transport	cytoplasm;cytosol;membrane	enzyme regulator activity;protein binding	RAB3GAP2			COPI-independent Golgi-to-ER retrograde traffic; RAB GEFs exchange GTP for GDP on RABs	24.1222	24.0503	0.0719	0.0116	0.0278	FDR <= 0.05	24.0834	24.0503	0.0331	0.1719	0.2302	FDR > 0.05
763	O14974	O14974;O14974-4;O14974-3;O14974-5;O14974-2;F8VZN8;H0YHI8;A0A3B3ISH4;H0YIS4;H0YIS3;H0YIM2;H0YHL8;F8VW28;A0A0U1RQZ1;H0YIL7	Protein phosphatase 1 regulatory subunit 12A OS=Homo sapiens OX=9606 GN=PPP1R12A PE=1 SV=1	41	39	233	cell organization and biogenesis;metabolic process;regulation of biological process;response to stimulus	chromosome;cytoplasm;cytoskeleton;cytosol	enzyme regulator activity;protein binding;signal transducer activity	PPP1R12A	Focal Adhesion; Regulation of Actin Cytoskeleton	Regulation of actin cytoskeleton; Vascular smooth muscle contraction; Platelet activation; Focal adhesion; cGMP-PKG signaling pathway; cAMP signaling pathway; Proteoglycans in cancer; Oxytocin signaling pathway	RHO GTPases activate PAKs; RHO GTPases Activate ROCKs; Regulation of PLK1 Activity at G2/M Transition; RHO GTPases activate PKNs; RHO GTPases activate CIT	25.9153	25.8862	0.0291	0.2512	0.347	FDR > 0.05	25.9111	25.8862	0.0249	0.3214	0.3916	FDR > 0.05
7609	P08758	P08758;D6RBL5;D6RBE9;E9PHT9;D6RCN3	Annexin A5 OS=Homo sapiens OX=9606 GN=ANXA5 PE=1 SV=2	28	27	992	coagulation;regulation of biological process;response to stimulus;transport	cytoplasm;cytosol;extracellular;membrane	enzyme regulator activity;metal ion binding;protein binding	ANXA5	Apoptosis-related network due to altered Notch3 in ovarian cancer; Simplified Interaction Map Between LOXL4 and Oxidative Stress Pathway; Prostaglandin Synthesis and Regulation		Platelet degranulation	29.2034	29.1485	0.0549	0.1673	0.252	FDR > 0.05	28.8715	29.1485	-0.277	0.0001	0.0003	FDR <= 0.01																					Matrisome-associated	ECM-affiliated Proteins
816	A0A3B3ITJ4	A0A3B3ITJ4	Heterogeneous nuclear ribonucleoprotein L (Fragment) OS=Homo sapiens OX=9606 GN=HNRNPL PE=1 SV=1	17	1	284								18.8074	18.9416	-0.1342	0.182	0.2689	FDR > 0.05	18.8265	18.9416	-0.1152	0.2451	0.3122	FDR > 0.05
3764	O76094	O76094;O76094-2;D6RDY6;R4GNC1	Signal recognition particle subunit SRP72 OS=Homo sapiens OX=9606 GN=SRP72 PE=1 SV=3	30	30	206	cell organization and biogenesis;response to stimulus;transport	cytoplasm;cytosol;endoplasmic reticulum	protein binding;RNA binding	SRP72		Protein export	SRP-dependent cotranslational protein targeting to membrane	24.3807	24.4679	-0.0873	0.0595	0.1084	FDR > 0.05	24.4183	24.4679	-0.0497	0.247	0.3144	FDR > 0.05
230	Q06278	Q06278;H7BXF7;H7C3Q1;C9J244	Aldehyde oxidase OS=Homo sapiens OX=9606 GN=AOX1 PE=1 SV=2	34	34	226	metabolic process	cytoplasm;cytosol	catalytic activity;metal ion binding;nucleotide binding;protein binding	AOX1	Nicotine Metabolism; Effects of Nitric Oxide; Tryptophan metabolism	Metabolic pathways; Retinol metabolism; Jak-STAT signaling pathway; Vitamin B6 metabolism; Tryptophan metabolism; Nicotinate and nicotinamide metabolism; Drug metabolism - cytochrome P450; Tyrosine metabolism; Valine, leucine and isoleucine degradation	Vitamins B6 activation to pyridoxal phosphate	23.4927	23.3927	0.1	0.0068	0.018	FDR <= 0.05	24.4472	23.3927	1.0544	0	0	FDR <= 0.01											-0.772	-0.5836	-0.6727	-0.5621	-0.8429	-0.5474	1.3452	1.2845	1.3511	1
3818	Q9NR09	Q9NR09;A0A3B3IUB9;H7C3P0	Baculoviral IAP repeat-containing protein 6 OS=Homo sapiens OX=9606 GN=BIRC6 PE=1 SV=2	43	43	194	cell death;cell division;metabolic process;regulation of biological process	cytoplasm;cytoskeleton;endosome;Golgi;membrane	catalytic activity;enzyme regulator activity;protein binding	BIRC6		Apoptosis - multiple species; Ubiquitin mediated proteolysis		22.7733	22.7015	0.0718	0.0328	0.066	FDR > 0.05	22.7436	22.7015	0.0421	0.1693	0.2273	FDR > 0.05
1748	E7EVH7	E7EVH7	Uncharacterized protein OS=Homo sapiens OX=9606 PE=4 SV=1	33	1	255	regulation of biological process;response to stimulus		catalytic activity;motor activity;protein binding					14.7685	14.6555	0.1129	0.5543	0.6478	FDR > 0.05	14.8523	14.6555	0.1967	0.3136	0.3835	FDR > 0.05
4201	Q16851	Q16851;A0A087WYS1;E7EUC7;Q16851-2;C9JNZ1;C9JWG0;C9JQU9;C9JVG3;C9JUW1;C9JTZ5;F2Z3H1;C9J6Q0	UTP--glucose-1-phosphate uridylyltransferase OS=Homo sapiens OX=9606 GN=UGP2 PE=1 SV=5	29	29	343	metabolic process	cytoplasm;cytosol;nucleus	catalytic activity;metal ion binding;nucleotide binding;protein binding	UGP2	Exercise-induced Circadian Regulation; Glycogen Metabolism; Glucuronidation	Amino sugar and nucleotide sugar metabolism; Galactose metabolism; Pentose and glucuronate interconversions; Starch and sucrose metabolism; Metabolic pathways	Formation of the active cofactor, UDP-glucuronate; Glycogen synthesis	25.4446	25.5316	-0.087	0.0402	0.0782	FDR > 0.05	25.377	25.5316	-0.1546	0.0025	0.0059	FDR <= 0.01
6707	Q53F39	A0A0A0MR93;K7ES91;Q53F39-2;Q53F39-3;Q53F39-4;K7EQV4;Q53F39-5;Q53F39;K7EQ70;K7ESB8;K7ER13;K7EJU0	Metallophosphoesterase 1 OS=Homo sapiens OX=9606 GN=MPPE1 PE=1 SV=2	3	3	17	metabolic process;transport	endoplasmic reticulum;Golgi;membrane	catalytic activity;metal ion binding;protein binding	MPPE1				18.1664	18.6919	-0.5254	0.0001	0.0004	FDR <= 0.01	17.9734	18.6919	-0.7185	0	0	FDR <= 0.01
3264	Q9Y450	Q9Y450;Q9Y450-4;J3QT46;H0YDX7;B7Z524;E9PHZ9;E9PN23;E9PS53;H0YES5	HBS1-like protein OS=Homo sapiens OX=9606 GN=HBS1L PE=1 SV=1	33	28	217	metabolic process;regulation of biological process;response to stimulus	cytosol;membrane	catalytic activity;nucleotide binding;protein binding;RNA binding	HBS1L		mRNA surveillance pathway; Legionellosis	mRNA decay by 3' to 5' exoribonuclease	24.7969	24.7428	0.0541	0.0645	0.1154	FDR > 0.05	24.6729	24.7428	-0.0699	0.0244	0.0425	FDR <= 0.05
2479	Q96JH7	Q96JH7	Deubiquitinating protein VCIP135 OS=Homo sapiens OX=9606 GN=VCPIP1 PE=1 SV=2	37	37	198	cell organization and biogenesis;metabolic process	cytoplasm;endoplasmic reticulum;Golgi;organelle lumen	catalytic activity	VCPIP1			Ovarian tumor domain proteases	23.2684	23.1151	0.1533	0.0173	0.0389	FDR <= 0.05	23.4927	23.1151	0.3776	0.0001	0.0003	FDR <= 0.01
3146	P45954	P45954;P45954-2	Short/branched chain specific acyl-CoA dehydrogenase, mitochondrial OS=Homo sapiens OX=9606 GN=ACADSB PE=1 SV=1	16	16	82	metabolic process	mitochondrion;organelle lumen	catalytic activity;nucleotide binding	ACADSB	Valproic acid pathway	Metabolic pathways; Fatty acid metabolism; Fatty acid degradation; Valine, leucine and isoleucine degradation	Branched-chain amino acid catabolism	23.0984	23.6226	-0.5242	0	0	FDR <= 0.01	23.4926	23.6226	-0.13	0.0161	0.0298	FDR <= 0.05
4511	P43007	P43007;P43007-2	Neutral amino acid transporter A OS=Homo sapiens OX=9606 GN=SLC1A4 PE=1 SV=1	8	8	51	cell communication;transport	cell surface;membrane	transporter activity	SLC1A4			Amino acid transport across the plasma membrane	21.5935	22.1166	-0.5231	0	0	FDR <= 0.01	21.9879	22.1166	-0.1287	0.0062	0.013	FDR <= 0.05
6286	P56381	P56381	ATP synthase subunit epsilon, mitochondrial OS=Homo sapiens OX=9606 GN=ATP5F1E PE=1 SV=2	2	2	8	cell organization and biogenesis;metabolic process;transport	membrane;mitochondrion;organelle lumen	catalytic activity;transporter activity	ATP5E	Electron Transport Chain; Oxidative phosphorylation	Metabolic pathways; Alzheimer's disease; Huntington's disease; Oxidative phosphorylation; Parkinson's disease	Cristae formation; Formation of ATP by chemiosmotic coupling	21.17	21.6821	-0.5121	0.0007	0.0028	FDR <= 0.01	21.2839	21.6821	-0.3981	0.0033	0.0077	FDR <= 0.01
2130	Q9Y2T3	Q9Y2T3;Q9Y2T3-3;Q9Y2T3-2;Q5SZC5;Q5SZC6	Guanine deaminase OS=Homo sapiens OX=9606 GN=GDA PE=1 SV=1	7	7	32	metabolic process	cytosol	catalytic activity;metal ion binding	GDA		Metabolic pathways; Purine metabolism	Purine catabolism	19.9824	20.5021	-0.5197	0	0.0003	FDR <= 0.01	19.1281	20.5021	-1.374	0	0	FDR <= 0.01											1.1218	0.1589	0.9325	0.0608	1.0746	0.3331	-1.0289	-1.3327	-1.3202	6
2761	P13645	P13645	Keratin, type I cytoskeletal 10 OS=Homo sapiens OX=9606 GN=KRT10 PE=1 SV=6	31	16	340	cell death;cell differentiation;metabolic process	cytoplasm;cytoskeleton;cytosol;membrane;nucleus	structural molecule activity	KRT10		Staphylococcus aureus infection	Formation of the cornified envelope	27.143	27.1265	0.0165	0.9769	0.9841	FDR > 0.05	27.0783	27.1265	-0.0482	0.9325	0.9458	FDR > 0.05
2761	P13645	P13645	SWISS-PROT:P13645 Tax_Id=9606 Gene_Symbol=KRT10 Keratin, type I cytoskeletal 10	31	16	334	metabolic process		structural molecule activity					27.143	27.1265	0.0165	0.9769	0.9841	FDR > 0.05	27.0783	27.1265	-0.0482	0.9325	0.9458	FDR > 0.05
5962	Q13136	Q13136;Q13136-2;A0A2R8Y7R9;E9PJZ7;H0YEF9;H0YDW2;H0YD72;G3V200;O75334-5;O75334-4;O75334-3;O75334-6;O75334;A0A1B0GVT3;H0YHK3;O75334-2;E9PPF6;O75335-2;B1APN9;O75335;O75334-7;O75145-2;O75145;M0QZB5;O75334-8;E9PID5;R4GN36;R4GNF1;H0YH95;H0YHJ4;O75335-1;A0A3B3ITS2;F8VYK7	Liprin-alpha-1 OS=Homo sapiens OX=9606 GN=PPFIA1 PE=1 SV=1	33	33	163	cell organization and biogenesis;cellular component movement;metabolic process;regulation of biological process;response to stimulus;transport	cytoplasm;cytoskeleton;cytosol;Golgi;nucleus	catalytic activity;motor activity;protein binding;signal transducer activity	PPFIA1			Norepinephrine Neurotransmitter Release Cycle; Receptor-type tyrosine-protein phosphatases; Glutamate Neurotransmitter Release Cycle; Acetylcholine Neurotransmitter Release Cycle; Serotonin Neurotransmitter Release Cycle; Dopamine Neurotransmitter Release Cycle	22.9786	23.0295	-0.0509	0.1389	0.2157	FDR > 0.05	23.0628	23.0295	0.0334	0.3126	0.3825	FDR > 0.05
301	P24539	Q5QNZ2;P24539	ATP synthase F(0) complex subunit B1, mitochondrial OS=Homo sapiens OX=9606 GN=ATP5PB PE=1 SV=2	11	11	174	cell organization and biogenesis;metabolic process;transport	membrane;mitochondrion;nucleus;organelle lumen	catalytic activity;protein binding;transporter activity	ATP5F1	Electron Transport Chain; Oxidative phosphorylation	Huntington's disease; Metabolic pathways; Parkinson's disease; Oxidative phosphorylation; Alzheimer's disease	Cristae formation; Formation of ATP by chemiosmotic coupling	24.6595	25.1464	-0.487	0	0.0001	FDR <= 0.01	24.7362	25.1464	-0.4102	0	0.0002	FDR <= 0.01
3137	P42765	P42765;A0A0B4J2A4;K7EME0;K7EJ68;K7EJB1;K7ER88	3-ketoacyl-CoA thiolase, mitochondrial OS=Homo sapiens OX=9606 GN=ACAA2 PE=1 SV=2	15	15	179	cell organization and biogenesis;metabolic process;regulation of biological process;response to stimulus	membrane;mitochondrion;organelle lumen	catalytic activity;protein binding;RNA binding	ACAA2	Fatty Acid Biosynthesis	Metabolic pathways; Fatty acid metabolism; Fatty acid degradation; Valine, leucine and isoleucine degradation; Fatty acid elongation	Mitochondrial Fatty Acid Beta-Oxidation	24.4649	24.9837	-0.5188	0	0	FDR <= 0.01	24.8948	24.9837	-0.0889	0.0367	0.0606	FDR > 0.05
5527	Q07021	Q07021;I3L3Q7;I3L3B0	Complement component 1 Q subcomponent-binding protein, mitochondrial OS=Homo sapiens OX=9606 GN=C1QBP PE=1 SV=1	5	5	29	cell death;cell organization and biogenesis;defense response;metabolic process;regulation of biological process;response to stimulus	cell surface;cytoplasm;cytosol;extracellular;membrane;mitochondrion;nucleus;organelle lumen	protein binding;RNA binding	C1QBP	Mesodermal Commitment Pathway	Herpes simplex infection	Intrinsic Pathway of Fibrin Clot Formation	24.7025	25.2212	-0.5187	0	0	FDR <= 0.01	25.0572	25.2212	-0.164	0.0047	0.0102	FDR <= 0.05
7830	P49750	P49750;P49750-1;P49750-3;H0YIQ2;F8VU51;H0YI23	YLP motif-containing protein 1 OS=Homo sapiens OX=9606 GN=YLPM1 PE=1 SV=4	38	37	200								23.9439	24.0383	-0.0944	0.0062	0.0167	FDR <= 0.05	23.9399	24.0383	-0.0985	0.005	0.0108	FDR <= 0.05
3929	Q13620-1	Q13620;K4DI93;Q13620-1;Q13620-3;A0A669KAX4;A6NE76;A0A669KAU9	Isoform 2 of Cullin-4B OS=Homo sapiens OX=9606 GN=CUL4B	42	31	245	cell organization and biogenesis;metabolic process;regulation of biological process;response to stimulus	cytosol	catalytic activity;DNA binding;protein binding	CUL4B	Mesodermal Commitment Pathway			24.8541	24.8916	-0.0375	0.1768	0.2628	FDR > 0.05	24.6782	24.8916	-0.2134	0	0.0002	FDR <= 0.01
3803	Q9H2D6	Q9H2D6;Q9H2D6-2;Q9H2D6-3;Q9H2D6-7;Q9H2D6-5;Q9H2D6-6;H0Y5J9;F6WYE2;F6TR96;F6WMF4	TRIO and F-actin-binding protein OS=Homo sapiens OX=9606 GN=TRIOBP PE=1 SV=3	34	33	213	cell division;cell organization and biogenesis;metabolic process;regulation of biological process	cytoplasm;cytoskeleton;nucleus	protein binding;RNA binding	TRIOBP				24.668	24.6032	0.0648	0.0557	0.1025	FDR > 0.05	24.6321	24.6032	0.0289	0.3469	0.4177	FDR > 0.05
6859	B5MCX3	B5MCX3;C9J2Q4;C9IY94;B5MD47	Septin-2 OS=Homo sapiens OX=9606 GN=SEPTIN2 PE=1 SV=1	20	1	476	cell division;cell organization and biogenesis;regulation of biological process;response to stimulus	cytoplasm;cytoskeleton;cytosol;membrane;nucleus	nucleotide binding;protein binding	SEPT2				17.6235	17.6604	-0.0369	0.5923	0.6805	FDR > 0.05	17.6113	17.6604	-0.0491	0.4793	0.5466	FDR > 0.05
5123	Q92504	A2AAT0;Q92504	Zinc transporter SLC39A7 OS=Homo sapiens OX=9606 GN=SLC39A7 PE=1 SV=2	3	3	13	cellular homeostasis;transport	endoplasmic reticulum;Golgi;membrane	protein binding;transporter activity	SLC39A7	NRF2 pathway; Zinc homeostasis		Zinc influx into cells by the SLC39 gene family	21.6243	22.1428	-0.5184	0.0029	0.0089	FDR <= 0.01	21.3521	22.1428	-0.7907	0.0002	0.0007	FDR <= 0.01
4555	Q15042	Q15042;Q15042-3;Q15042-4	Rab3 GTPase-activating protein catalytic subunit OS=Homo sapiens OX=9606 GN=RAB3GAP1 PE=1 SV=3	34	34	182	cell organization and biogenesis;regulation of biological process;response to stimulus	cytoplasm;cytosol;Golgi;membrane	enzyme regulator activity;protein binding	RAB3GAP1			COPI-independent Golgi-to-ER retrograde traffic; RAB GEFs exchange GTP for GDP on RABs	24.0115	23.9713	0.0402	0.205	0.2962	FDR > 0.05	24.117	23.9713	0.1457	0.0011	0.0029	FDR <= 0.01
6784	Q96GA7	Q96GA7;F8VYZ3;H0YID3	Serine dehydratase-like OS=Homo sapiens OX=9606 GN=SDSL PE=1 SV=1	7	7	38	metabolic process	mitochondrion	catalytic activity;protein binding	SDSL		Cysteine and methionine metabolism; Biosynthesis of amino acids; Metabolic pathways; Glycine, serine and threonine metabolism; Valine, leucine and isoleucine biosynthesis; Carbon metabolism		21.0318	21.5492	-0.5175	0	0	FDR <= 0.01	21.0379	21.5492	-0.5114	0	0	FDR <= 0.01
3431	O15294	O15294;O15294-3;O15294-2;O15294-4;C9JZL3	UDP-N-acetylglucosamine--peptide N-acetylglucosaminyltransferase 110 kDa subunit OS=Homo sapiens OX=9606 GN=OGT PE=1 SV=3	28	28	147	cell death;cell organization and biogenesis;metabolic process;regulation of biological process;response to stimulus	cytoplasm;cytosol;membrane;mitochondrion;nucleus	catalytic activity;protein binding	OGT	Ectoderm Differentiation	Insulin resistance; Other types of O-glycan biosynthesis	HATs acetylate histones; UCH proteinases	22.9397	22.8348	0.1049	0.0055	0.015	FDR <= 0.05	23.0653	22.8348	0.2305	0	0.0002	FDR <= 0.01
7754	P62195	P62195-2;P62195;J3QSA9;J3QQM1;J3KRP2;J3QLH6;J3QSE0;J3QRW1;J3QRR3	26S proteasome regulatory subunit 8 OS=Homo sapiens OX=9606 GN=PSMC5 PE=1 SV=1	25	24	283	metabolic process;regulation of biological process;response to stimulus;transport	cytoplasm;cytosol;membrane;nucleus;proteasome	catalytic activity;nucleotide binding;protein binding;RNA binding	PSMC5	Proteasome Degradation; Parkin-Ubiquitin Proteasomal System pathway	Epstein-Barr virus infection; Proteasome	Regulation of RAS by GAPs; CDT1 association with the CDC6:ORC:origin complex; Downstream TCR signaling; UCH proteinases; NIK-->noncanonical NF-kB signaling; Hh mutants that don't undergo autocatalytic processing are degraded by ERAD; SCF-beta-TrCP mediated degradation of Emi1; Cross-presentation of soluble exogenous antigens (endosomes); Separation of Sister Chromatids; Vpu mediated degradation o…	24.6256	24.6788	-0.0532	0.164	0.2479	FDR > 0.05	24.7313	24.6788	0.0525	0.1692	0.2273	FDR > 0.05
7802	Q6DD88	Q6DD88;F5H6I7;F5GWF8	Atlastin-3 OS=Homo sapiens OX=9606 GN=ATL3 PE=1 SV=1	22	21	354	cell organization and biogenesis;regulation of biological process;transport	endoplasmic reticulum;membrane	catalytic activity;nucleotide binding;protein binding	ATL3				25.9277	25.9878	-0.0601	0.2266	0.3203	FDR > 0.05	25.8941	25.9878	-0.0938	0.0752	0.1124	FDR > 0.05
6156	P22692	P22692;P22692-2	Insulin-like growth factor-binding protein 4 OS=Homo sapiens OX=9606 GN=IGFBP4 PE=1 SV=2	7	7	39	cell proliferation;defense response;metabolic process;regulation of biological process;response to stimulus	extracellular;organelle lumen	protein binding	IGFBP4	Myometrial Relaxation and Contraction Pathways		Post-translational protein phosphorylation; Regulation of Insulin-like Growth Factor (IGF) transport and uptake by Insulin-like Growth Factor Binding Proteins (IGFBPs)	20.6979	21.2152	-0.5173	0.0004	0.0018	FDR <= 0.01	21.0792	21.2152	-0.136	0.1682	0.2261	FDR > 0.05																					Core matrisome	ECM Glycoproteins
1168	P29373	P29373;Q5SYZ4	Cellular retinoic acid-binding protein 2 OS=Homo sapiens OX=9606 GN=CRABP2 PE=1 SV=2	5	5	33	metabolic process;regulation of biological process;response to stimulus;transport	cytoplasm;cytosol;endoplasmic reticulum;nucleus	protein binding;transporter activity	CRABP2	Vitamin A and Carotenoid Metabolism		Signaling by Retinoic Acid	23.0899	23.6073	-0.5173	0	0	FDR <= 0.01	21.5452	23.6073	-2.0621	0	0	FDR <= 0.01											0.8841	0.4004	0.9471	0.3277	0.9426	0.3767	-1.3646	-1.2807	-1.2334	6
4493	O60506	O60506-2;O60506;O60506-4;O60506-3;B7Z645;O60506-5;F6UXX1	Heterogeneous nuclear ribonucleoprotein Q OS=Homo sapiens OX=9606 GN=SYNCRIP PE=1 SV=2	27	19	404	cell differentiation;metabolic process;regulation of biological process;response to stimulus	cytoplasm;endoplasmic reticulum;membrane;nucleus;spliceosomal complex	protein binding;RNA binding	SYNCRIP				26.2427	26.2027	0.04	0.1293	0.2033	FDR > 0.05	26.1532	26.2027	-0.0494	0.0702	0.1062	FDR > 0.05
1324	P60033	P60033;E9PJK1;H0YDL9;H0YDJ9;E9PRJ8;A6NMH8;E9PIF1	CD81 antigen OS=Homo sapiens OX=9606 GN=CD81 PE=1 SV=1	6	6	69	cell proliferation;metabolic process;regulation of biological process;response to stimulus;transport	membrane	protein binding;receptor activity	CD81	B Cell Receptor Signaling Pathway	Malaria; Hepatitis C; B cell receptor signaling pathway	Regulation of Complement cascade; Immunoregulatory interactions between a Lymphoid and a non-Lymphoid cell	24.5322	25.0491	-0.5169	0.0001	0.0005	FDR <= 0.01	24.2949	25.0491	-0.7542	0	0	FDR <= 0.01
7259	O43852	O43852;O43852-3;O43852-6;O43852-5;O43852-10;O43852-9;O43852-13;O43852-14;O43852-11	Calumenin OS=Homo sapiens OX=9606 GN=CALU PE=1 SV=2	16	3	150	metabolic process	endoplasmic reticulum;extracellular;Golgi;membrane;organelle lumen	metal ion binding;protein binding	CALU	NOTCH1 regulation of human endothelial cell calcification		Platelet degranulation ; Post-translational protein phosphorylation; Regulation of Insulin-like Growth Factor (IGF) transport and uptake by Insulin-like Growth Factor Binding Proteins (IGFBPs)	22.2092	22.7248	-0.5156	0	0	FDR <= 0.01	22.8908	22.7248	0.166	0.0036	0.0082	FDR <= 0.01
2707	O95757	O95757;E9PDE8;D6RJ96	Heat shock 70 kDa protein 4L OS=Homo sapiens OX=9606 GN=HSPA4L PE=1 SV=3	30	25	222	metabolic process;response to stimulus	cytoplasm;cytosol;nucleus	nucleotide binding	HSPA4L		Protein processing in endoplasmic reticulum	Regulation of HSF1-mediated heat shock response	23.2845	23.2487	0.0358	0.181	0.2677	FDR > 0.05	23.4934	23.2487	0.2447	0	0.0001	FDR <= 0.01
2427	Q16881	Q16881-3;Q16881-4;A0A087WSW9;Q16881;A0A087WSY9;Q16881-2;Q16881-6;A0A182DWI3;F8W809;Q16881-5;E9PIR7;Q16881-7;E2QRB9;E9PKD3;A0A0B4J225;E9PIZ5;E9PKI4;E9PLT3;E9PQI3	Thioredoxin reductase 1, cytoplasmic OS=Homo sapiens OX=9606 GN=TXNRD1 PE=1 SV=3	22	21	205	cell proliferation;cellular homeostasis;metabolic process;regulation of biological process;response to stimulus;transport	cytoplasm;cytosol;mitochondrion;nucleus	antioxidant activity;catalytic activity;nucleotide binding;protein binding	TXNRD1	Selenium Micronutrient Network; Selenium Metabolism and Selenoproteins; NRF2 pathway; Oxidative Stress	Selenocompound metabolism; Pyrimidine metabolism	Metabolism of ingested MeSeO2H into MeSeH; Uptake and function of diphtheria toxin; Interconversion of nucleotide di- and triphosphates; TP53 Regulates Metabolic Genes; PPARA activates gene expression; Detoxification of Reactive Oxygen Species; Metabolism of ingested H2SeO4 and H2SeO3 into H2Se	24.3704	24.8853	-0.5149	0	0	FDR <= 0.01	24.883	24.8853	-0.0023	0.9461	0.9578	FDR > 0.05
6705	Q96HJ9-2	Q96HJ9-2	Isoform 2 of Protein FMC1 homolog OS=Homo sapiens OX=9606 GN=FMC1	15	1	127	cell organization and biogenesis;regulation of biological process	mitochondrion	RNA binding	C7orf55-LUC7L2; C7orf55; FMC1				16.8502	17.3644	-0.5143	0.0008	0.003	FDR <= 0.01	17.2434	17.3644	-0.121	0.2535	0.3209	FDR > 0.05
8333	Q9NZN5-2	Q9NZN5-2;Q9NZN5;E9PMR6	Isoform 2 of Rho guanine nucleotide exchange factor 12 OS=Homo sapiens OX=9606 GN=ARHGEF12	37	37	230	regulation of biological process;response to stimulus	cytoplasm;cytosol;membrane	enzyme regulator activity;protein binding	ARHGEF12				22.8899	22.975	-0.0852	0.0172	0.0388	FDR <= 0.05	23.0436	22.975	0.0685	0.0425	0.069	FDR > 0.05
965	A0A0A0MT83	P26440;A0A0A0MT83;P26440-2;A0A0S2Z4K7;H7C4G6;H0YLC3;H0YN10;H0YKV0;A0A087WVD3	Isovaleryl-CoA dehydrogenase isoform 1 OS=Homo sapiens OX=9606 GN=IVD PE=1 SV=2	19	19	141								24.4282	24.9422	-0.514	0	0	FDR <= 0.01	24.6996	24.9422	-0.2425	0.0001	0.0004	FDR <= 0.01
4530	O75955	O75955;A0A140T9R1;O75955-2;A0A140T9W4;A2AB09;A0A140T9X0;A2AB10;A2AB12;A0A140T959;A0A140T9C3;A2AB13;A0A0G2JJQ6;A2AB11;A0A140T9B1;A0A140T957;A0A140T910;A0A140T974;A2ABJ5;A0A140T905;A0A140T907	Flotillin-1 OS=Homo sapiens OX=9606 GN=FLOT1 PE=1 SV=3	25	25	178	cell organization and biogenesis;regulation of biological process;response to stimulus;transport	cytoskeleton;endosome;membrane	protein binding	FLOT1	Angiopoietin Like Protein 8 Regulatory Pathway; Insulin Signaling	Insulin signaling pathway	Synaptic adhesion-like molecules	24.1744	24.0511	0.1233	0.0248	0.0526	FDR > 0.05	24.4229	24.0511	0.3718	0	0.0002	FDR <= 0.01
6158	Q14157-5	Q14157-5;Q14157;Q14157-3;Q14157-4;F8W726;Q14157-1;Q5VU77;Q5VU81;Q5VU78;Q5VU79;Q5VU80;H0Y5H6;H7C2T8	Isoform 5 of Ubiquitin-associated protein 2-like OS=Homo sapiens OX=9606 GN=UBAP2L	23	23	245	regulation of biological process	cytoplasm	protein binding;RNA binding	UBAP2L				24.971	24.9818	-0.0108	0.6879	0.7612	FDR > 0.05	25.0182	24.9818	0.0364	0.1963	0.258	FDR > 0.05
2667	Q96AY4	Q96AY4;A0A087WW06;B0QYP5	Tetratricopeptide repeat protein 28 OS=Homo sapiens OX=9606 GN=TTC28 PE=1 SV=4	33	33	150	cell division;regulation of biological process	cytoplasm;cytoskeleton	protein binding	TTC28				22.2516	22.2809	-0.0292	0.2211	0.3148	FDR > 0.05	22.344	22.2809	0.0631	0.021	0.0373	FDR <= 0.05
370	Q8IWJ2	Q8IWJ2;B8ZZW2;B8ZZA5;H7BYJ9;H7C010	GRIP and coiled-coil domain-containing protein 2 OS=Homo sapiens OX=9606 GN=GCC2 PE=1 SV=4	44	41	179	cell organization and biogenesis;metabolic process;regulation of biological process;transport	cytoplasm;cytosol;Golgi;membrane	protein binding;structural molecule activity	GCC2	Deregulation of Rab and Rab Effector Genes in Bladder Cancer		Retrograde transport at the Trans-Golgi-Network	23.4562	23.5043	-0.0481	0.0903	0.1523	FDR > 0.05	23.433	23.5043	-0.0713	0.0214	0.0379	FDR <= 0.05
1032	A6NLN1	A6NLN1;P26599;P26599-3;P26599-2;A0A0U1RRM4;K7EKJ7;K7EK45;A0A087WU68;K7ES59;A0A0D9SF20;K7ELW5	Polypyrimidine tract binding protein 1, isoform CRA_b OS=Homo sapiens OX=9606 GN=PTBP1 PE=1 SV=4	17	14	245	metabolic process;regulation of biological process;response to stimulus	membrane;nucleus	protein binding;RNA binding	PTBP1	mir-124 predicted interactions with cell cycle and differentiation; mRNA Processing			25.1888	25.0973	0.0915	0.0432	0.0828	FDR > 0.05	24.9987	25.0973	-0.0986	0.0323	0.0543	FDR > 0.05
1773	Q9Y263	Q9Y263;E5RIM3;H0YBW4;H0YC16;H0YAU9	Phospholipase A-2-activating protein OS=Homo sapiens OX=9606 GN=PLAA PE=1 SV=2	30	30	255	cell communication;cellular homeostasis;defense response;metabolic process;regulation of biological process;response to stimulus	cytoplasm;nucleus	enzyme regulator activity;protein binding	PLAA		Protein processing in endoplasmic reticulum		24.0973	24.1787	-0.0815	0.0366	0.0722	FDR > 0.05	24.1843	24.1787	0.0056	0.8685	0.8944	FDR > 0.05
6226	Q9Y375	Q9Y375;H0YNN4;H0YL22;H0YNB7	Complex I intermediate-associated protein 30, mitochondrial OS=Homo sapiens OX=9606 GN=NDUFAF1 PE=1 SV=2	4	4	19	cell organization and biogenesis;metabolic process	cytosol;membrane;mitochondrion	protein binding	NDUFAF1			Complex I biogenesis	18.8396	19.3535	-0.514	0	0	FDR <= 0.01	19.2248	19.3535	-0.1287	0.0107	0.0208	FDR <= 0.05
2400	Q7Z7F7	Q7Z7F7;Q7Z7F7-2;X6RIW1	39S ribosomal protein L55, mitochondrial OS=Homo sapiens OX=9606 GN=MRPL55 PE=1 SV=1	3	3	27	cell organization and biogenesis;metabolic process	membrane;mitochondrion;ribosome	structural molecule activity	MRPL55			Mitochondrial translation initiation; Mitochondrial translation elongation; Mitochondrial translation termination	20.1878	20.7011	-0.5133	0.0001	0.0005	FDR <= 0.01	20.1603	20.7011	-0.5409	0.0001	0.0003	FDR <= 0.01
648	P24311	P24311;A0A3B3IRN8;A0A3B3ITX0	Cytochrome c oxidase subunit 7B, mitochondrial OS=Homo sapiens OX=9606 GN=COX7B PE=1 SV=2	2	2	12	metabolic process;transport	membrane;mitochondrion	catalytic activity;transporter activity	COX7B	Electron Transport Chain	Non-alcoholic fatty liver disease (NAFLD); Cardiac muscle contraction; Alzheimer's disease; Huntington's disease; Metabolic pathways; Oxidative phosphorylation; Parkinson's disease	TP53 Regulates Metabolic Genes; Respiratory electron transport	20.6208	21.1059	-0.4851	0.0042	0.0119	FDR <= 0.05	20.5042	21.1059	-0.6017	0.0012	0.0032	FDR <= 0.01
1874	O43852-4	O43852-2;O43852-4;O43852-8;O43852-7	Isoform 4 of Calumenin OS=Homo sapiens OX=9606 GN=CALU	16	3	154	metabolic process	endoplasmic reticulum;extracellular;Golgi;membrane;organelle lumen	metal ion binding;protein binding	CALU	NOTCH1 regulation of human endothelial cell calcification			25.9827	26.4938	-0.5111	0	0	FDR <= 0.01	26.6736	26.4938	0.1799	0.0021	0.0051	FDR <= 0.01
3732	Q6NZY7	Q6NZY7	Cdc42 effector protein 5 OS=Homo sapiens OX=9606 GN=CDC42EP5 PE=2 SV=1	2	2	12	cell organization and biogenesis;metabolic process;regulation of biological process;response to stimulus	cytoplasm;cytoskeleton;cytosol;membrane	enzyme regulator activity;protein binding	CDC42EP5			MAPK6/MAPK4 signaling	16.2185	16.7283	-0.5098	0.0002	0.001	FDR <= 0.01	16.747	16.7283	0.0188	0.8183	0.8531	FDR > 0.05
5979	P54802	P54802;K7ENX5	Alpha-N-acetylglucosaminidase OS=Homo sapiens OX=9606 GN=NAGLU PE=1 SV=2	12	12	66	cell organization and biogenesis;metabolic process;response to stimulus	organelle lumen;vacuole	catalytic activity	NAGLU		Glycosaminoglycan degradation; Metabolic pathways; Lysosome	MPS IIIB - Sanfilippo syndrome B; HS-GAG degradation	21.3914	21.8999	-0.5085	0	0	FDR <= 0.01	21.1911	21.8999	-0.7088	0	0	FDR <= 0.01
3703	Q8IV20	Q8IV20	Laccase domain-containing protein 1 OS=Homo sapiens OX=9606 GN=LACC1 PE=1 SV=1	3	3	15			metal ion binding;protein binding	LACC1				17.4493	17.9567	-0.5074	0	0.0001	FDR <= 0.01	19.3146	17.9567	1.3579	0	0	FDR <= 0.01											-0.3729	-1.054	-0.3932	-0.8659	-0.25	-0.9148	1.2976	1.2372	1.316	1
5044	H0Y922	H0Y922	MICOS complex subunit (Fragment) OS=Homo sapiens OX=9606 GN=CHCHD6 PE=1 SV=1	6	1	25		cytosol;membrane;mitochondrion						18.7403	19.2447	-0.5044	0.0003	0.0016	FDR <= 0.01	19.0952	19.2447	-0.1495	0.1164	0.1642	FDR > 0.05
4548	Q13409-2	Q13409-6;Q13409-2;Q13409-3;Q13409-5;Q13409-7;Q13409;E7EQL5;E7EV09;E7EQU2;E7ETL8;E7EMU4;E7ESD3;E7ET01;E9PGG1;E7ERR6;E7EUM4;E7ERH4	Isoform 2B of Cytoplasmic dynein 1 intermediate chain 2 OS=Homo sapiens OX=9606 GN=DYNC1I2	18	17	195	cell organization and biogenesis;cellular component movement;regulation of biological process;transport	cytoplasm;cytosol	catalytic activity;motor activity;protein binding	DYNC1I2				25.1853	25.1267	0.0585	0.2858	0.3843	FDR > 0.05	25.4444	25.1267	0.3177	0.0003	0.0009	FDR <= 0.01
1640	P15170-3	P15170-2;P15170-3;P15170;H3BR35;H3BSV8	Isoform 3 of Eukaryotic peptide chain release factor GTP-binding subunit ERF3A OS=Homo sapiens OX=9606 GN=GSPT1	24	10	272	cell organization and biogenesis;metabolic process	cytosol	catalytic activity;nucleotide binding;protein binding;RNA binding	GSPT1				25.7383	25.7077	0.0306	0.2248	0.3185	FDR > 0.05	25.9007	25.7077	0.193	0	0.0002	FDR <= 0.01
2320	P63302	F8WB74;P63302;A0A087WX02	Selenoprotein W OS=Homo sapiens OX=9606 GN=SELENOW PE=1 SV=3	2	2	12		cytoplasm	antioxidant activity;catalytic activity	SEPW1; SELENOW	Selenium Micronutrient Network; Selenium Metabolism and Selenoproteins			19.8477	20.3514	-0.5038	0.0013	0.0044	FDR <= 0.01	19.1914	20.3514	-1.16	0	0	FDR <= 0.01											1.0527	0.0249	1.0107	0.1034	1.143	0.1656	-0.6939	-1.633	-1.1734	7
6198	Q9UHQ9	Q9UHQ9;H7C0R7	NADH-cytochrome b5 reductase 1 OS=Homo sapiens OX=9606 GN=CYB5R1 PE=1 SV=1	12	12	89	metabolic process;transport	membrane;mitochondrion	catalytic activity;protein binding	CYB5R1	Oxidation by Cytochrome P450	Amino sugar and nucleotide sugar metabolism	Platelet degranulation ; Erythrocytes take up carbon dioxide and release oxygen	23.8883	24.3919	-0.5035	0	0	FDR <= 0.01	24.3025	24.3919	-0.0893	0.0216	0.0382	FDR <= 0.05
3381	Q8WW59	Q8WW59	SPRY domain-containing protein 4 OS=Homo sapiens OX=9606 GN=SPRYD4 PE=1 SV=2	5	5	24		mitochondrion;nucleus	protein binding	SPRYD4				20.7371	21.2397	-0.5025	0.0014	0.0049	FDR <= 0.01	21.0239	21.2397	-0.2158	0.0747	0.1118	FDR > 0.05
861	A0A3B3IUC4	P06280;A0A3B3IUC4	Alpha-galactosidase OS=Homo sapiens OX=9606 GN=GLA PE=1 SV=1	4	4	26								19.5548	20.0572	-0.5025	0	0.0002	FDR <= 0.01	19.7117	20.0572	-0.3455	0.0004	0.0012	FDR <= 0.01
3529	P23743	P23743;G3V4E1;H0YJH4;P23743-3;F8W1H7;H0YJE7;F8W1M3;C9JM35;P23743-2;G3V327;G3V4I3;F8VNZ9	Diacylglycerol kinase alpha OS=Homo sapiens OX=9606 GN=DGKA PE=1 SV=3	30	30	275	metabolic process;regulation of biological process;response to stimulus	cytosol;membrane	catalytic activity;metal ion binding;nucleotide binding	DGKA		Phosphatidylinositol signaling system; Glycerophospholipid metabolism; Glycerolipid metabolism; Choline metabolism in cancer; Phospholipase D signaling pathway; Metabolic pathways	Effects of PIP2 hydrolysis; Gastrin-CREB signalling pathway via PKC and MAPK	24.9647	24.8714	0.0933	0.0101	0.0249	FDR <= 0.05	24.2316	24.8714	-0.6398	0	0	FDR <= 0.01
7313	P23284	P23284	Peptidyl-prolyl cis-trans isomerase B OS=Homo sapiens OX=9606 GN=PPIB PE=1 SV=2	17	15	337	metabolic process;regulation of biological process	endoplasmic reticulum;membrane;nucleus;organelle lumen	catalytic activity;protein binding;RNA binding	PPIB	Prolactin Signaling Pathway		Collagen biosynthesis and modifying enzymes	27.2413	27.7422	-0.5009	0	0	FDR <= 0.01	27.372	27.7422	-0.3702	0	0.0001	FDR <= 0.01
2655	P43034	P43034;I3L3N5;P43034-2;I3L495	Platelet-activating factor acetylhydrolase IB subunit alpha OS=Homo sapiens OX=9606 GN=PAFAH1B1 PE=1 SV=2	19	18	265	cell communication;cell differentiation;cell division;cell organization and biogenesis;cell proliferation;cellular component movement;development;metabolic process;regulation of biological process;response to stimulus;transport	chromosome;cytoplasm;cytoskeleton;cytosol;membrane;nucleus	catalytic activity;protein binding	PAFAH1B1	Wnt Signaling Pathway and Pluripotency; Wnt Signaling Pathway	Ether lipid metabolism; Metabolic pathways	COPI-independent Golgi-to-ER retrograde traffic; Regulation of PLK1 Activity at G2/M Transition; AURKA Activation by TPX2; Anchoring of the basal body to the plasma membrane; Recruitment of NuMA to mitotic centrosomes; Recruitment of mitotic centrosome proteins and complexes; Loss of Nlp from mitotic centrosomes; Amplification of signal from unattached kinetochores via a MAD2 inhibitory signal; S…	25.0138	24.9267	0.0871	0.077	0.1338	FDR > 0.05	25.1091	24.9267	0.1824	0.0028	0.0066	FDR <= 0.01
6160	Q9BQC6	Q9BQC6	Ribosomal protein 63, mitochondrial OS=Homo sapiens OX=9606 GN=MRPL57 PE=1 SV=1	4	4	39	cell organization and biogenesis;metabolic process	membrane;mitochondrion;ribosome	structural molecule activity	MRP63; MRPL57			Mitochondrial translation initiation; Mitochondrial translation elongation; Mitochondrial translation termination	21.2783	21.7788	-0.5005	0	0.0001	FDR <= 0.01	21.3269	21.7788	-0.4519	0	0.0001	FDR <= 0.01
3311	B5ME19	Q99613;Q99613-2;B5ME19;H3BPE4;H3BPE3	Eukaryotic translation initiation factor 3 subunit C-like protein OS=Homo sapiens OX=9606 GN=EIF3CL PE=3 SV=1	26	26	248	metabolic process	cytoplasm	protein binding;RNA binding	EIF3CL		RNA transport		25.1482	25.0917	0.0566	0.1543	0.2353	FDR > 0.05	25.2254	25.0917	0.1337	0.0059	0.0125	FDR <= 0.05
2395	O43390	O43390;O43390-3;B4DT28	Heterogeneous nuclear ribonucleoprotein R OS=Homo sapiens OX=9606 GN=HNRNPR PE=1 SV=1	27	2	404	metabolic process;regulation of biological process	cytoplasm;endoplasmic reticulum;nucleus;spliceosomal complex	protein binding;RNA binding	HNRNPR	mRNA Processing		mRNA Splicing - Major Pathway	26.6548	26.6568	-0.002	0.9479	0.9629	FDR > 0.05	26.4033	26.6568	-0.2535	0	0.0001	FDR <= 0.01
4051	P19021-5	P19021-5	Isoform 5 of Peptidyl-glycine alpha-amidating monooxygenase OS=Homo sapiens OX=9606 GN=PAM	25	1	141	cell organization and biogenesis;metabolic process;regulation of biological process;response to stimulus;transport	cell surface;membrane	catalytic activity;metal ion binding;protein binding	PAM				18.5932	19.0935	-0.5003	0	0.0002	FDR <= 0.01	18.3845	19.0935	-0.709	0	0	FDR <= 0.01
4257	P21796	P21796;C9JI87	Voltage-dependent anion-selective channel protein 1 OS=Homo sapiens OX=9606 GN=VDAC1 PE=1 SV=2	21	19	315	cell communication;cell death;cell differentiation;defense response;metabolic process;regulation of biological process;response to stimulus;transport	membrane;mitochondrion;nucleus	protein binding;transporter activity	VDAC1		Influenza A; cGMP-PKG signaling pathway; HTLV-I infection; Calcium signaling pathway; Parkinson's disease; Huntington's disease; NOD-like receptor signaling pathway	Mitochondrial calcium ion transport; Ub-specific processing proteases; Mitochondrial protein import; Pink/Parkin Mediated Mitophagy	26.1513	26.2069	-0.0555	0.2241	0.3177	FDR > 0.05	25.9638	26.2069	-0.243	0.0004	0.0013	FDR <= 0.01
5825	Q9C0B5	Q9C0B5;Q9C0B5-2;H0YEF4	Palmitoyltransferase ZDHHC5 OS=Homo sapiens OX=9606 GN=ZDHHC5 PE=1 SV=2	8	8	41	metabolic process	cytoplasm;membrane	catalytic activity;metal ion binding	ZDHHC5				20.8581	21.3573	-0.4992	0	0	FDR <= 0.01	21.2899	21.3573	-0.0674	0.0446	0.0719	FDR > 0.05
4060	Q96BQ5	Q96BQ5	Coiled-coil domain-containing protein 127 OS=Homo sapiens OX=9606 GN=CCDC127 PE=1 SV=1	6	6	28				CCDC127				21.2241	21.7223	-0.4983	0	0	FDR <= 0.01	21.4453	21.7223	-0.277	0.0001	0.0004	FDR <= 0.01
5122	Q8NBS9	Q8NBS9;Q8NBS9-2	Thioredoxin domain-containing protein 5 OS=Homo sapiens OX=9606 GN=TXNDC5 PE=1 SV=2	18	18	245	cellular homeostasis;metabolic process;regulation of biological process;response to stimulus;transport	endoplasmic reticulum;extracellular;organelle lumen	catalytic activity;protein binding	TXNDC5		Protein processing in endoplasmic reticulum	Neutrophil degranulation; Golgi Associated Vesicle Biogenesis; Lysosome Vesicle Biogenesis	25.8629	26.3607	-0.4979	0	0	FDR <= 0.01	26.3819	26.3607	0.0211	0.5203	0.5864	FDR > 0.05
66	Q9P0P8	Q9P0P8;A0A0D9SEI0	Uncharacterized protein C6orf203 OS=Homo sapiens OX=9606 GN=C6orf203 PE=1 SV=1	2	2	17		mitochondrion		C6orf203				19.5009	19.9988	-0.4979	0	0	FDR <= 0.01	19.6217	19.9988	-0.3771	0	0	FDR <= 0.01
267	Q92621	Q92621;U3KPX2;U3KQ97	Nuclear pore complex protein Nup205 OS=Homo sapiens OX=9606 GN=NUP205 PE=1 SV=3	39	39	213	cell organization and biogenesis;metabolic process;regulation of biological process;transport	membrane;nucleus	protein binding;structural molecule activity	NUP205		RNA transport	Rev-mediated nuclear export of HIV RNA; ISG15 antiviral mechanism; NEP/NS2 Interacts with the Cellular Export Machinery; tRNA processing in the nucleus; Transcriptional regulation by small RNAs; Nuclear Pore Complex (NPC) Disassembly; Regulation of Glucokinase by Glucokinase Regulatory Protein; Vpr-mediated nuclear import of PICs; Regulation of HSF1-mediated heat shock response; snRNP Assembly; S…	24.249	24.1987	0.0503	0.113	0.1823	FDR > 0.05	24.0412	24.1987	-0.1575	0.0005	0.0016	FDR <= 0.01
653	Q96C36	Q96C36;A0A087WTV6;J3KR12;A0A087WZR9	Pyrroline-5-carboxylate reductase 2 OS=Homo sapiens OX=9606 GN=PYCR2 PE=1 SV=1	7	6	60	metabolic process;response to stimulus	cytoplasm;mitochondrion;organelle lumen	catalytic activity;nucleotide binding	PYCR2		Arginine and proline metabolism; Biosynthesis of amino acids; Metabolic pathways	Amino acid synthesis and interconversion (transamination)	21.9474	22.445	-0.4976	0	0.0001	FDR <= 0.01	21.9736	22.445	-0.4714	0	0.0001	FDR <= 0.01
6386	O43747	O43747-2;O43747;H3BNR4;H3BUN9;H3BR36;B4DGE1;H3BN71;H3BRM7;B3KNW1;H3BS13;H3BV30;H3BN75	AP-1 complex subunit gamma-1 OS=Homo sapiens OX=9606 GN=AP1G1 PE=1 SV=5	26	26	195	cell organization and biogenesis;regulation of biological process;transport	cytoplasm;cytosol;endosome;Golgi;membrane	protein binding;transporter activity	AP1G1		Lysosome	Nef mediated downregulation of MHC class I complex cell surface expression; MHC class II antigen presentation; Golgi Associated Vesicle Biogenesis; Lysosome Vesicle Biogenesis	24.6842	24.7103	-0.026	0.5358	0.6333	FDR > 0.05	24.6964	24.7103	-0.0139	0.7387	0.7871	FDR > 0.05
72	Q9Y6D5	Q9Y6D5	Brefeldin A-inhibited guanine nucleotide-exchange protein 2 OS=Homo sapiens OX=9606 GN=ARFGEF2 PE=1 SV=3	36	23	235	cell organization and biogenesis;metabolic process;regulation of biological process;response to stimulus;transport	cytoplasm;cytoskeleton;cytosol;endosome;Golgi;membrane	protein binding	ARFGEF2		Endocytosis	Association of TriC/CCT with target proteins during biosynthesis	22.1794	22.1985	-0.0191	0.5665	0.6579	FDR > 0.05	22.2436	22.1985	0.045	0.1971	0.2586	FDR > 0.05
4254	A0A1W2PRI2	A0A1W2PRI2;Q09470	Potassium voltage-gated channel subfamily A member 1 (Fragment) OS=Homo sapiens OX=9606 GN=KCNA1 PE=1 SV=1	3	3	16	cell organization and biogenesis;regulation of biological process;transport	membrane	transporter activity					18.8479	19.345	-0.4971	0.0001	0.0007	FDR <= 0.01	17.6246	19.345	-1.7204	0	0	FDR <= 0.01											0.9001	0.2732	0.9649	0.4372	1.0096	0.231	-1.4749	-1.2181	-1.123	6
4409	Q9HD34	Q9HD34	LYR motif-containing protein 4 OS=Homo sapiens OX=9606 GN=LYRM4 PE=1 SV=1	2	2	12	metabolic process	mitochondrion;nucleus;organelle lumen		LYRM4			Mitochondrial iron-sulfur cluster biogenesis	19.7096	20.2041	-0.4944	0	0.0001	FDR <= 0.01	19.9441	20.2041	-0.26	0.0005	0.0016	FDR <= 0.01
4336	P47897	P47897;A0A1B0GVU9;P47897-2;B4DDN1;H7C0R3;C9J165;A0A0U1RQT0;A0A0U1RRI9;A0A0U1RQE9;A0A0U1RQL2;A0A0U1RR66;A0A0U1RQM8;A0A0U1RQX5;A0A0U1RQU2;A0A1B0GTT3;A0A0U1RQQ5;A0A0U1RQJ6;A0A0U1RRC8;A0A0U1RRJ7;A0A0U1RQX9	Glutamine--tRNA ligase OS=Homo sapiens OX=9606 GN=QARS PE=1 SV=1	28	27	265	metabolic process;regulation of biological process	cytoplasm;cytosol;organelle lumen	catalytic activity;enzyme regulator activity;nucleotide binding;protein binding	QARS		Metabolic pathways; Aminoacyl-tRNA biosynthesis	Mitochondrial tRNA aminoacylation; Cytosolic tRNA aminoacylation; SeMet incorporation into proteins	24.7736	24.7733	0.0004	0.9892	0.9927	FDR > 0.05	24.7444	24.7733	-0.0289	0.2961	0.3664	FDR > 0.05
3255	Q9NYQ7	Q9NYQ7;Q9NYQ7-2	Cadherin EGF LAG seven-pass G-type receptor 3 OS=Homo sapiens OX=9606 GN=CELSR3 PE=1 SV=2	2	2	8	cell organization and biogenesis;cellular component movement;development;regulation of biological process;response to stimulus	cell surface;membrane	metal ion binding;protein binding;receptor activity;signal transducer activity	CELSR3	GPCRs, Other			17.2706	17.3051	-0.0345	0.9372	0.955	FDR > 0.05	16.1203	17.3051	-1.1848	0.0236	0.0413	FDR <= 0.05
4525	B4DDF4	B4DUT8;B4DDF4;Q99439;H3BVI6;Q99439-2;A0A087X271;A0A087X1X5;K7ES69;H3BQH0;A0A087WV51	Calponin OS=Homo sapiens OX=9606 GN=CNN2 PE=1 SV=1	10	9	232	cell organization and biogenesis;regulation of biological process;response to stimulus;transport	cytoskeleton;extracellular;membrane;organelle lumen	protein binding	CNN2	Myometrial Relaxation and Contraction Pathways			24.94	25.434	-0.494	0	0	FDR <= 0.01	25.9977	25.434	0.5638	0	0	FDR <= 0.01
3723	Q96JC1	Q96JC1;Q96JC1-2	Vam6/Vps39-like protein OS=Homo sapiens OX=9606 GN=VPS39 PE=1 SV=2	29	29	192	cell organization and biogenesis;metabolic process;transport	cytoplasm;endosome;membrane;vacuole	protein binding	VPS39				23.0446	23.0105	0.0341	0.2721	0.3702	FDR > 0.05	23.0446	23.0105	0.0342	0.2709	0.3398	FDR > 0.05
5950	P0DP91	P0DP91	Chimeric ERCC6-PGBD3 protein OS=Homo sapiens OX=9606 GN=CSB-PGBD3 PE=1 SV=1	2	1	7	metabolic process;regulation of biological process;response to stimulus	cytosol;Golgi;nucleus	catalytic activity;DNA binding;enzyme regulator activity;nucleotide binding;protein binding	ERCC6				13.0752	13.5692	-0.4939	0.0002	0.0008	FDR <= 0.01	13.9502	13.5692	0.3811	0.0009	0.0024	FDR <= 0.01
6027	Q9Y6D6	Q9Y6D6;E5RIF2;E5RHL7;E5RHZ1;E5RJN9	Brefeldin A-inhibited guanine nucleotide-exchange protein 1 OS=Homo sapiens OX=9606 GN=ARFGEF1 PE=1 SV=2	39	26	230	cell organization and biogenesis;regulation of biological process;transport	cytoplasm;cytosol;Golgi;membrane;nucleus	enzyme regulator activity;protein binding	ARFGEF1		Endocytosis		23.6481	23.6042	0.0439	0.1141	0.1835	FDR > 0.05	23.8445	23.6042	0.2403	0	0.0001	FDR <= 0.01
6154	P55884	P55884;P55884-2;C9JZG1;C9JQN7	Eukaryotic translation initiation factor 3 subunit B OS=Homo sapiens OX=9606 GN=EIF3B PE=1 SV=3	29	29	249	cell organization and biogenesis;metabolic process;regulation of biological process	cytoplasm;cytosol	protein binding;RNA binding;structural molecule activity	EIF3B	Translation Factors	RNA transport	Formation of the ternary complex, and subsequently, the 43S complex; L13a-mediated translational silencing of Ceruloplasmin expression; Translation initiation complex formation; GTP hydrolysis and joining of the 60S ribosomal subunit; Formation of a pool of free 40S subunits; Ribosomal scanning and start codon recognition	24.8648	24.8184	0.0464	0.1623	0.2456	FDR > 0.05	24.8592	24.8184	0.0408	0.2129	0.2766	FDR > 0.05
3844	Q9ULV4	Q9ULV4;Q9ULV4-2;Q9ULV4-3;F8VUX3;F8VVB7;F8W1H8;F8VSA4;F8VRE9;F8VTT6	Coronin-1C OS=Homo sapiens OX=9606 GN=CORO1C PE=1 SV=1	24	2	317	cell organization and biogenesis;cellular component movement;regulation of biological process;response to stimulus;transport	cytoplasm;cytoskeleton;membrane	protein binding	CORO1C				26.317	26.16	0.157	0.0055	0.0151	FDR <= 0.05	26.288	26.16	0.128	0.0154	0.0287	FDR <= 0.05
1515	A0A096LPI6	A0A096LPI6;P0DPI2;A0A0B4J2D5;P0DPI2-2;A0A0B4J2D5-2;A0A096LNH5;A0A096LP73;A0A096LP12;F2Z2Q0;A0A2R8YDR7;H7C2G3;A0A096LNJ1;A0A2R8Y6K9;H7C1F6	Utp12 domain-containing protein (Fragment) OS=Homo sapiens OX=9606 PE=4 SV=2	13	10	123		mitochondrion						23.8562	24.35	-0.4937	0	0	FDR <= 0.01	23.9637	24.35	-0.3862	0	0.0001	FDR <= 0.01
3413	Q9UHB9	Q9UHB9;Q9UHB9-4;Q9UHB9-2;Q9UHB9-3	Signal recognition particle subunit SRP68 OS=Homo sapiens OX=9606 GN=SRP68 PE=1 SV=2	31	31	188	cell organization and biogenesis;response to stimulus;transport	cytoplasm;cytosol;endoplasmic reticulum;nucleus;ribosome	protein binding;RNA binding	SRP68		Protein export	SRP-dependent cotranslational protein targeting to membrane	24.7278	24.8364	-0.1086	0.0111	0.0268	FDR <= 0.05	24.7696	24.8364	-0.0668	0.0779	0.1159	FDR > 0.05
7249	Q8WX93	Q8WX93-3;Q8WX93;Q8WX93-8;Q8WX93-5;Q8WX93-4;Q8WX93-9;Q8WX93-2;Q8WX93-7;H0YA05;A0A3B3ISX8;F8WA26;D6R9F5	Palladin OS=Homo sapiens OX=9606 GN=PALLD PE=1 SV=3	27	26	215	cell organization and biogenesis;cellular component movement	cytoplasm;cytoskeleton;cytosol;membrane;nucleus	protein binding	PALLD				23.8043	24.2976	-0.4933	0	0	FDR <= 0.01	24.2243	24.2976	-0.0733	0.0603	0.0932	FDR > 0.05
2350	O43175	O43175;A0A286YF22;A0A286YFA2;A0A2C9F2M7;A0A286YFL2;A0A286YFM8;A0A286YF78;A0A286YER3;A0A286YFC8;A0A286YFB2;A0A286YFF3;A0A286YF34;A0A286YFK5;A0A286YFE1	D-3-phosphoglycerate dehydrogenase OS=Homo sapiens OX=9606 GN=PHGDH PE=1 SV=4	17	17	185	metabolic process	cytosol	catalytic activity;nucleotide binding	PHGDH	Trans-sulfuration and one carbon metabolism	Glycine, serine and threonine metabolism; Biosynthesis of amino acids; Carbon metabolism; Metabolic pathways	Serine biosynthesis	25.0847	25.5778	-0.4932	0	0	FDR <= 0.01	24.9641	25.5778	-0.6138	0	0	FDR <= 0.01
3441	A0A3B3ISZ5	A0A3B3ISZ5	Tight junction protein ZO-2 OS=Homo sapiens OX=9606 GN=TJP2 PE=1 SV=1	37	1	208								15.6028	15.1625	0.4403	0.0188	0.0419	FDR <= 0.05	15.3653	15.1625	0.2028	0.2134	0.277	FDR > 0.05
6876	Q8TEX9	Q8TEX9-2;Q8TEX9;H0YN14;H0YMR4;H0YN07;H0YL92;H0YLV0;H0YKG5	Importin-4 OS=Homo sapiens OX=9606 GN=IPO4 PE=1 SV=2	25	25	161	cell organization and biogenesis;transport	cytoplasm;membrane;nucleus	protein binding;transporter activity	IPO4				23.084	23.0046	0.0795	0.0281	0.0583	FDR > 0.05	22.8244	23.0046	-0.1801	0.0003	0.001	FDR <= 0.01
3823	O43390-2	O43390-2;O43390-4	Isoform 2 of Heterogeneous nuclear ribonucleoprotein R OS=Homo sapiens OX=9606 GN=HNRNPR	26	1	403	metabolic process;regulation of biological process	endoplasmic reticulum;spliceosomal complex	protein binding;RNA binding	HNRNPR	mRNA Processing			17.5747	17.5974	-0.0227	0.844	0.8854	FDR > 0.05	17.495	17.5974	-0.1024	0.3856	0.4572	FDR > 0.05
2803	Q14690	A0A3B3IUD7;Q14690	Protein RRP5 homolog OS=Homo sapiens OX=9606 GN=PDCD11 PE=1 SV=3	37	37	192	metabolic process	cytosol;nucleus	protein binding;RNA binding	PDCD11			Major pathway of rRNA processing in the nucleolus and cytosol; rRNA modification in the nucleus and cytosol	23.0747	22.9863	0.0884	0.0041	0.0118	FDR <= 0.05	23.0452	22.9863	0.0589	0.0296	0.0503	FDR > 0.05
8375	P30084	P30084	Enoyl-CoA hydratase, mitochondrial OS=Homo sapiens OX=9606 GN=ECHS1 PE=1 SV=4	15	15	160	metabolic process	mitochondrion;organelle lumen	catalytic activity;protein binding	ECHS1	Fatty Acid Beta Oxidation; Fatty Acid Biosynthesis; Tryptophan metabolism	Lysine degradation; Butanoate metabolism; Metabolic pathways; Propanoate metabolism; Valine, leucine and isoleucine degradation; beta-Alanine metabolism; Carbon metabolism; Fatty acid metabolism; Fatty acid degradation; Tryptophan metabolism; Fatty acid elongation	Beta oxidation of hexanoyl-CoA to butanoyl-CoA; Beta oxidation of butanoyl-CoA to acetyl-CoA; Beta oxidation of decanoyl-CoA to octanoyl-CoA-CoA; Beta oxidation of octanoyl-CoA to hexanoyl-CoA; Beta oxidation of lauroyl-CoA to decanoyl-CoA-CoA	25.3205	25.8131	-0.4926	0	0	FDR <= 0.01	25.4628	25.8131	-0.3503	0	0	FDR <= 0.01
2954	P23634-2	P23634-4;P23634-2;P23634-5;P23634-3;H7BY13;H0YDG5	Isoform XA of Plasma membrane calcium-transporting ATPase 4 OS=Homo sapiens OX=9606 GN=ATP2B4	37	2	523	cellular component movement;cellular homeostasis;regulation of biological process;response to stimulus;transport	membrane	catalytic activity;enzyme regulator activity;metal ion binding;nucleotide binding;protein binding;transporter activity	ATP2B4				18.9577	19.4496	-0.4919	0.0004	0.0017	FDR <= 0.01	18.5532	19.4496	-0.8964	0	0	FDR <= 0.01
7073	P10809	P10809;E7ESH4;E7EXB4;P10809-2;C9JL25;C9JCQ4;C9JL19	60 kDa heat shock protein, mitochondrial OS=Homo sapiens OX=9606 GN=HSPD1 PE=1 SV=2	33	33	577	cell organization and biogenesis;cell proliferation;metabolic process;regulation of biological process;response to stimulus;transport	cell surface;cytoplasm;cytosol;endosome;membrane;mitochondrion;organelle lumen	catalytic activity;DNA binding;nucleotide binding;protein binding;RNA binding	HSPD1	Apoptosis-related network due to altered Notch3 in ovarian cancer; Sudden Infant Death Syndrome (SIDS) Susceptibility Pathways	Legionellosis; Type I diabetes mellitus; Tuberculosis; RNA degradation	TFAP2A acts as a transcriptional repressor during retinoic acid induced cell differentiation; Mitochondrial protein import; Metabolism of proteins	27.2755	27.7672	-0.4917	0	0	FDR <= 0.01	27.45	27.7672	-0.3171	0	0	FDR <= 0.01
5965	Q99714	Q99714;Q99714-2;Q5H928	3-hydroxyacyl-CoA dehydrogenase type-2 OS=Homo sapiens OX=9606 GN=HSD17B10 PE=1 SV=3	12	12	200	cell organization and biogenesis;metabolic process	cytoplasm;membrane;mitochondrion;organelle lumen	catalytic activity;protein binding;RNA binding	HSD17B10	Alzheimers Disease; Valproic acid pathway; Tryptophan metabolism	Alzheimer's disease; Metabolic pathways; Valine, leucine and isoleucine degradation	tRNA processing in the mitochondrion; rRNA processing in the mitochondrion; Branched-chain amino acid catabolism; tRNA modification in the mitochondrion	23.2241	23.7143	-0.4903	0	0	FDR <= 0.01	23.1427	23.7143	-0.5716	0	0	FDR <= 0.01
189	Q9NR28	Q9NR28;Q9NR28-2;Q9NR28-3;A0A024RBT2;H7BZK7;A0A2U3TZH2;H7BZQ7	Diablo homolog, mitochondrial OS=Homo sapiens OX=9606 GN=DIABLO PE=1 SV=1	8	8	61	cell death;metabolic process;regulation of biological process;response to stimulus	cytoplasm;cytosol;mitochondrion	protein binding	DIABLO	TNF alpha Signaling Pathway; Nanomaterial induced apoptosis; Apoptosis	Apoptosis - multiple species; Apoptosis	SMAC-mediated dissociation of IAP:caspase complexes ; SMAC binds to IAPs ; Release of apoptotic factors from the mitochondria	23.3236	23.8136	-0.49	0	0	FDR <= 0.01	23.3783	23.8136	-0.4353	0	0	FDR <= 0.01
325	O95819-5	O95819-5	Isoform 5 of Mitogen-activated protein kinase kinase kinase kinase 4 OS=Homo sapiens OX=9606 GN=MAP4K4	35	0	246	cell organization and biogenesis;metabolic process;regulation of biological process;response to stimulus	cytoplasm	catalytic activity;nucleotide binding;protein binding;signal transducer activity	MAP4K4	MAPK Signaling Pathway; Angiopoietin Like Protein 8 Regulatory Pathway; Insulin Signaling			16.6253	16.6341	-0.0088	0.9201	0.9424	FDR > 0.05	16.7127	16.6341	0.0786	0.3814	0.4531	FDR > 0.05
4176	Q9BW30	Q9BW30	Tubulin polymerization-promoting protein family member 3 OS=Homo sapiens OX=9606 GN=TPPP3 PE=1 SV=1	11	11	46	cell organization and biogenesis	cytoplasm;cytoskeleton	protein binding	TPPP3				21.1649	21.6535	-0.4885	0	0	FDR <= 0.01	22.6851	21.6535	1.0316	0	0	FDR <= 0.01											-0.2752	-1.0139	-0.2828	-0.9757	-0.2498	-0.9983	1.2287	1.3064	1.2605	1
8094	P09651	P09651;P09651-2;F8W6I7;P09651-3;F8VZ49;F8W646;A0A2R8Y4L2;F8VYN5;F8VTQ5;H0YH80	Heterogeneous nuclear ribonucleoprotein A1 OS=Homo sapiens OX=9606 GN=HNRNPA1 PE=1 SV=5	16	5	321	cell communication;metabolic process;regulation of biological process;response to stimulus;transport	cytoplasm;membrane;nucleus;spliceosomal complex	DNA binding;protein binding;RNA binding	HNRNPA1	mRNA Processing	Spliceosome	mRNA Splicing - Major Pathway; FGFR2 alternative splicing	25.8344	25.6599	0.1746	0.0076	0.0196	FDR <= 0.05	25.5249	25.6599	-0.135	0.0255	0.0441	FDR <= 0.05
3624	Q9UBS3	Q9UBS3	DnaJ homolog subfamily B member 9 OS=Homo sapiens OX=9606 GN=DNAJB9 PE=1 SV=1	3	3	12	metabolic process	cytoplasm;endoplasmic reticulum;membrane;organelle lumen	protein binding	DNAJB9	Photodynamic therapy-induced unfolded protein response; VEGFA-VEGFR2 Signaling Pathway		XBP1(S) activates chaperone genes	17.8014	18.2896	-0.4882	0	0	FDR <= 0.01	18.1102	18.2896	-0.1794	0.0035	0.008	FDR <= 0.01
2029	P36957	P36957;P36957-2;Q86SW4	Dihydrolipoyllysine-residue succinyltransferase component of 2-oxoglutarate dehydrogenase complex, mitochondrial OS=Homo sapiens OX=9606 GN=DLST PE=1 SV=4	12	12	100	metabolic process	membrane;mitochondrion;nucleus;organelle lumen	catalytic activity	DLST	TCA Cycle and Deficiency of Pyruvate Dehydrogenase complex (PDHc); Amino Acid metabolism; TCA Cycle	Citrate cycle (TCA cycle); Lysine degradation; Carbon metabolism; Metabolic pathways	Lysine catabolism; Glyoxylate metabolism and glycine degradation; Citric acid cycle (TCA cycle)	23.7276	24.2114	-0.4838	0	0	FDR <= 0.01	24.2776	24.2114	0.0662	0.1585	0.2148	FDR > 0.05
8289	Q04721	Q04721	Neurogenic locus notch homolog protein 2 OS=Homo sapiens OX=9606 GN=NOTCH2 PE=1 SV=3	25	24	171	cell death;cell differentiation;development;metabolic process;regulation of biological process;response to stimulus	cell surface;cytoplasm;extracellular;membrane;nucleus	metal ion binding;protein binding;receptor activity;signal transducer activity	NOTCH2	Neural Crest Differentiation; Notch Signaling Pathway; Canonical and Non-canonical Notch signaling; Role of Osx and miRNAs in tooth development; Notch Signaling Pathway	Notch signaling pathway; Th1 and Th2 cell differentiation; Breast cancer; Dorso-ventral axis formation; Endocrine resistance; Thyroid hormone signaling pathway; MicroRNAs in cancer	NOTCH2 Activation and Transmission of Signal to the Nucleus; Defective LFNG causes SCDO3; Pre-NOTCH Processing in Golgi; Notch-HLH transcription pathway; Pre-NOTCH Transcription and Translation; Pre-NOTCH Processing in the Endoplasmic Reticulum; NOTCH2 intracellular domain regulates transcription	22.9117	22.8896	0.022	0.5944	0.6824	FDR > 0.05	22.9346	22.8896	0.045	0.2903	0.3602	FDR > 0.05
1678	O94874	O94874;O94874-2;O94874-3	E3 UFM1-protein ligase 1 OS=Homo sapiens OX=9606 GN=UFL1 PE=1 SV=2	32	31	278	cell differentiation;metabolic process;regulation of biological process;response to stimulus	cytoplasm;cytosol;endoplasmic reticulum;membrane	catalytic activity;protein binding	UFL1			Antigen processing: Ubiquitination & Proteasome degradation	24.6073	24.7273	-0.12	0.0038	0.011	FDR <= 0.05	24.587	24.7273	-0.1403	0.0015	0.0039	FDR <= 0.01
1067	P13674	P13674	Prolyl 4-hydroxylase subunit alpha-1 OS=Homo sapiens OX=9606 GN=P4HA1 PE=1 SV=2	28	1	299	cell organization and biogenesis;metabolic process	endoplasmic reticulum;membrane;mitochondrion;organelle lumen	catalytic activity;metal ion binding;protein binding	P4HA1		Metabolic pathways; Arginine and proline metabolism	Collagen biosynthesis and modifying enzymes	19.5753	19.5631	0.0122	0.8614	0.8987	FDR > 0.05	19.4724	19.5631	-0.0907	0.2182	0.2824	FDR > 0.05																					Matrisome-associated	ECM Regulators
3741	P13489	P13489;H0YCR7;E9PIM9;E9PMJ3;E9PLZ3;E9PIK5;E9PMN0;E9PMA9	Ribonuclease inhibitor OS=Homo sapiens OX=9606 GN=RNH1 PE=1 SV=2	23	23	382	metabolic process;regulation of biological process	cytoplasm;cytosol	enzyme regulator activity;protein binding	RNH1				25.2945	25.2329	0.0616	0.2543	0.3501	FDR > 0.05	25.941	25.2329	0.7081	0	0	FDR <= 0.01
1450	G3V180	G3V180;Q9NY33;G3V1D3;Q9NY33-4;E9PQ14;E9PPK9;E9PKK8;E9PNX5;Q9NY33-2;E9PQF2	Dipeptidyl peptidase 3 OS=Homo sapiens OX=9606 GN=DPP3 PE=1 SV=1	30	30	166	metabolic process	cytoplasm;cytosol;membrane	catalytic activity;metal ion binding;protein binding	DPP3				25.1372	25.1453	-0.008	0.7563	0.817	FDR > 0.05	25.3248	25.1453	0.1796	0.0001	0.0004	FDR <= 0.01
273	E7ESC6	E7ESC6;Q9UIA9;H0YBE1;E5RIW1	Exportin-7 OS=Homo sapiens OX=9606 GN=XPO7 PE=1 SV=1	29	29	233	transport	cytoplasm;nucleus	protein binding;transporter activity	XPO7				24.0286	24.0362	-0.0076	0.8203	0.8669	FDR > 0.05	24.1062	24.0362	0.07	0.063	0.0969	FDR > 0.05
7943	Q9NUJ1	Q9NUJ1;Q9NUJ1-2;Q9NUJ1-3	Mycophenolic acid acyl-glucuronide esterase, mitochondrial OS=Homo sapiens OX=9606 GN=ABHD10 PE=1 SV=1	11	11	105	metabolic process	cytosol;mitochondrion;organelle lumen	catalytic activity	ABHD10			Glucuronidation	22.8509	23.3379	-0.487	0	0.0001	FDR <= 0.01	22.9406	23.3379	-0.3972	0	0.0001	FDR <= 0.01
2226	Q9Y2E5	Q9Y2E5;H0YA68;Q9Y2E5-2;E9PCD7	Epididymis-specific alpha-mannosidase OS=Homo sapiens OX=9606 GN=MAN2B2 PE=1 SV=4	13	13	65	metabolic process	extracellular;organelle lumen	catalytic activity;metal ion binding	MAN2B2		Other glycan degradation	Lysosomal oligosaccharide catabolism	20.6158	21.1025	-0.4867	0	0	FDR <= 0.01	20.7302	21.1025	-0.3724	0	0	FDR <= 0.01
9	Q13423	Q13423;E9PCX7;A0A590UK29;A0A590UJM2;A0A590UK15;A0A590UJI3;D6RAI5;D6RHU2;A0A590UJA4;A0A590UKC7;D6RCR6;H0Y8P5	NAD(P) transhydrogenase, mitochondrial OS=Homo sapiens OX=9606 GN=NNT PE=1 SV=3	32	32	355	metabolic process;transport	membrane;mitochondrion	catalytic activity;nucleotide binding;transporter activity	NNT		Metabolic pathways; Nicotinate and nicotinamide metabolism	Citric acid cycle (TCA cycle)	25.4568	25.9431	-0.4863	0	0	FDR <= 0.01	25.385	25.9431	-0.5581	0	0	FDR <= 0.01
6616	A0A2R8Y566	A0A2R8Y566;Q9P260;Q9P260-2;A0A075B785	RAB11-binding protein RELCH OS=Homo sapiens OX=9606 GN=RELCH PE=1 SV=1	26	26	160								22.6125	22.6866	-0.0741	0.105	0.1717	FDR > 0.05	22.5889	22.6866	-0.0977	0.0425	0.0689	FDR > 0.05
2294	Q02252	Q02252-2;Q02252;G3V4Z4	Methylmalonate-semialdehyde dehydrogenase [acylating], mitochondrial OS=Homo sapiens OX=9606 GN=ALDH6A1 PE=1 SV=2	20	20	128	cell differentiation;metabolic process	mitochondrion;organelle lumen	catalytic activity;RNA binding	ALDH6A1		Metabolic pathways; Carbon metabolism; Valine, leucine and isoleucine degradation; beta-Alanine metabolism; Inositol phosphate metabolism; Propanoate metabolism	Branched-chain amino acid catabolism	23.713	24.1993	-0.4863	0	0	FDR <= 0.01	23.7868	24.1993	-0.4125	0	0	FDR <= 0.01
8382	Q96A35	Q96A35;X6RJ73	39S ribosomal protein L24, mitochondrial OS=Homo sapiens OX=9606 GN=MRPL24 PE=1 SV=1	8	8	45	cell organization and biogenesis;metabolic process	membrane;mitochondrion;ribosome	structural molecule activity	MRPL24		Ribosome	Mitochondrial translation initiation; Mitochondrial translation elongation; Mitochondrial translation termination	21.814	22.2993	-0.4853	0.0005	0.0021	FDR <= 0.01	22.0144	22.2993	-0.2849	0.0107	0.0209	FDR <= 0.05
5433	Q9BT78	Q9BT78;D6RFN0;D6RAX7;Q9BT78-2;D6RD63	COP9 signalosome complex subunit 4 OS=Homo sapiens OX=9606 GN=COPS4 PE=1 SV=1	23	23	269	cell organization and biogenesis;metabolic process;response to stimulus	cytoplasm;cytosol;nucleus	catalytic activity;protein binding	COPS4			Cargo recognition for clathrin-mediated endocytosis; DNA Damage Recognition in GG-NER; Formation of TC-NER Pre-Incision Complex; Neddylation	24.3867	24.4643	-0.0776	0.0255	0.0539	FDR > 0.05	24.268	24.4643	-0.1963	0.0001	0.0005	FDR <= 0.01
2831	O15371	O15371-3;O15371;O15371-2;B0QYA5;B0QYA4;B0QYA6;B0QYA8	Eukaryotic translation initiation factor 3 subunit D OS=Homo sapiens OX=9606 GN=EIF3D PE=1 SV=1	20	20	243	cell organization and biogenesis;metabolic process;regulation of biological process	cytoplasm;cytosol;membrane	protein binding;RNA binding	EIF3D	Translation Factors	RNA transport	Formation of the ternary complex, and subsequently, the 43S complex; L13a-mediated translational silencing of Ceruloplasmin expression; Translation initiation complex formation; GTP hydrolysis and joining of the 60S ribosomal subunit; Formation of a pool of free 40S subunits; Ribosomal scanning and start codon recognition	24.6384	24.6399	-0.0015	0.9622	0.972	FDR > 0.05	24.7336	24.6399	0.0937	0.0168	0.0309	FDR <= 0.05
8270	P09622	P09622;P09622-2;E9PEX6;P09622-3;F8WDM5;F2Z2E3;A0A1W2PR83	Dihydrolipoyl dehydrogenase, mitochondrial OS=Homo sapiens OX=9606 GN=DLD PE=1 SV=2	15	15	159	cellular homeostasis;metabolic process;regulation of biological process	mitochondrion;organelle lumen	catalytic activity;nucleotide binding;protein binding	DLD	Fatty Acid Beta Oxidation; TCA Cycle and Deficiency of Pyruvate Dehydrogenase complex (PDHc); Amino Acid metabolism; Glycolysis and Gluconeogenesis; TCA Cycle	Glycolysis / Gluconeogenesis; Carbon metabolism; Glyoxylate and dicarboxylate metabolism; Pyruvate metabolism; Citrate cycle (TCA cycle); Valine, leucine and isoleucine degradation; Metabolic pathways; Glycine, serine and threonine metabolism; Propanoate metabolism	Glycine degradation; Regulation of pyruvate dehydrogenase (PDH) complex; Lysine catabolism; Signaling by Retinoic Acid; Branched-chain amino acid catabolism; Citric acid cycle (TCA cycle)	25.409	25.8865	-0.4775	0	0	FDR <= 0.01	25.5007	25.8865	-0.3858	0	0	FDR <= 0.01
4405	O00231	O00231;O00231-2;J3QRY4;J3QS13	26S proteasome non-ATPase regulatory subunit 11 OS=Homo sapiens OX=9606 GN=PSMD11 PE=1 SV=3	25	25	265	cell differentiation;cell organization and biogenesis;metabolic process;regulation of biological process;response to stimulus;transport	cytoplasm;cytosol;extracellular;membrane;nucleus;organelle lumen;proteasome	catalytic activity;protein binding;structural molecule activity	PSMD11	Proteasome Degradation; Parkin-Ubiquitin Proteasomal System pathway	Epstein-Barr virus infection; Proteasome	Regulation of RAS by GAPs; CDT1 association with the CDC6:ORC:origin complex; Downstream TCR signaling; UCH proteinases; NIK-->noncanonical NF-kB signaling; Hh mutants that don't undergo autocatalytic processing are degraded by ERAD; SCF-beta-TrCP mediated degradation of Emi1; Neutrophil degranulation; Cross-presentation of soluble exogenous antigens (endosomes); Separation of Sister Chromatids; …	26.0227	26.0583	-0.0356	0.2147	0.3075	FDR > 0.05	26.1312	26.0583	0.0729	0.0247	0.0429	FDR <= 0.05
6106	P40227	P40227;P40227-2	T-complex protein 1 subunit zeta OS=Homo sapiens OX=9606 GN=CCT6A PE=1 SV=3	26	19	252	metabolic process;regulation of biological process	cytoplasm;cytosol;membrane	nucleotide binding;protein binding;RNA binding	CCT6A			Prefoldin mediated transfer of substrate to CCT/TriC; Cooperation of PDCL (PhLP1) and TRiC/CCT in G-protein beta folding; Association of TriC/CCT with target proteins during biosynthesis; Formation of tubulin folding intermediates by CCT/TriC; Folding of actin by CCT/TriC	26.1984	26.191	0.0074	0.8127	0.8618	FDR > 0.05	26.2531	26.191	0.0621	0.0739	0.1108	FDR > 0.05
7401	A0A669KB05	A0A669KB05;A0A669KB62	Catenin delta-1 OS=Homo sapiens OX=9606 GN=CTNND1 PE=1 SV=1	37	1	69								15.5352	15.2434	0.2918	0.0228	0.0491	FDR <= 0.05	15.2758	15.2434	0.0325	0.7624	0.807	FDR > 0.05
2156	Q15046	Q15046;Q15046-2;H3BVA8;J3KRL2;H3BPV7	Lysine--tRNA ligase OS=Homo sapiens OX=9606 GN=KARS PE=1 SV=3	30	30	262	metabolic process;regulation of biological process;response to stimulus	cytoplasm;cytosol;extracellular;membrane;mitochondrion;nucleus;organelle lumen	catalytic activity;nucleotide binding;protein binding;RNA binding	KARS		Aminoacyl-tRNA biosynthesis	Mitochondrial tRNA aminoacylation; Cytosolic tRNA aminoacylation; SeMet incorporation into proteins	25.656	25.6681	-0.012	0.6091	0.6954	FDR > 0.05	25.6256	25.6681	-0.0425	0.0975	0.1409	FDR > 0.05
4687	P24928	P24928;P24928-2	DNA-directed RNA polymerase II subunit RPB1 OS=Homo sapiens OX=9606 GN=POLR2A PE=1 SV=2	38	38	192	metabolic process;regulation of biological process;response to stimulus	cytoplasm;nucleus	catalytic activity;DNA binding;metal ion binding;protein binding;RNA binding	POLR2A	Eukaryotic Transcription Initiation; mRNA Processing	RNA polymerase; Epstein-Barr virus infection; Metabolic pathways; Huntington's disease; Pyrimidine metabolism; Purine metabolism; Herpes simplex infection	Signaling by FGFR2 IIIa TM; RNA polymerase II transcribes snRNA genes; Abortive elongation of HIV-1 transcript in the absence of Tat; Tat-mediated HIV elongation arrest and recovery; Activation of anterior HOX genes in hindbrain development during early embryogenesis; Formation of HIV-1 elongation complex containing HIV-1 Tat; MicroRNA (miRNA) biogenesis; Formation of the HIV-1 Early Elongation C…	23.2689	23.208	0.0609	0.0413	0.0798	FDR > 0.05	23.1578	23.208	-0.0502	0.0801	0.1189	FDR > 0.05
486	O00116	O00116;A0A1B0GWA2;A0A2R8YEL0;B8ZZ81	Alkyldihydroxyacetonephosphate synthase, peroxisomal OS=Homo sapiens OX=9606 GN=AGPS PE=1 SV=1	21	21	146	metabolic process	membrane;mitochondrion;organelle lumen	catalytic activity;nucleotide binding;protein binding	AGPS	Triacylglyceride Synthesis	Peroxisome; Metabolic pathways; Ether lipid metabolism	Plasmalogen biosynthesis	23.9369	24.0428	-0.1058	0.0051	0.014	FDR <= 0.05	24.023	24.0428	-0.0198	0.495	0.5613	FDR > 0.05
4766	A0A0A0MRG8	Q16611;A0A0A0MRG8	Bcl-2 homologous antagonist/killer OS=Homo sapiens OX=9606 GN=BAK1 PE=1 SV=1	2	2	12	regulation of biological process	membrane			Nanomaterial induced apoptosis; Regulation of Apoptosis by Parathyroid Hormone-related Protein; Oxidative Damage; DNA Damage Response (only ATM dependent)			16.8803	17.3631	-0.4827	0.002	0.0066	FDR <= 0.01	16.993	17.3631	-0.37	0.0088	0.0177	FDR <= 0.05
2902	P43155	P43155;P43155-2;P43155-3;A6PVN3;B7ZBP5;H0Y4Z7	Carnitine O-acetyltransferase OS=Homo sapiens OX=9606 GN=CRAT PE=1 SV=5	19	19	168	metabolic process;transport	endoplasmic reticulum;membrane;mitochondrion;organelle lumen	catalytic activity;protein binding	CRAT	Fatty Acid Beta Oxidation	Peroxisome	Beta-oxidation of pristanoyl-CoA	23.783	24.2647	-0.4818	0	0	FDR <= 0.01	24.2514	24.2647	-0.0133	0.6449	0.7019	FDR > 0.05
7695	O75439	O75439;G3V0E4;F8WAZ6;F8WEA6;F8WBE1	Mitochondrial-processing peptidase subunit beta OS=Homo sapiens OX=9606 GN=PMPCB PE=1 SV=2	16	15	116	metabolic process;transport	membrane;mitochondrion;organelle lumen	catalytic activity;metal ion binding	PMPCB			Processing of SMDT1; Mitochondrial protein import; Metabolism of proteins	23.258	23.7396	-0.4817	0	0	FDR <= 0.01	23.4701	23.7396	-0.2695	0	0.0001	FDR <= 0.01
99	A0A2R8Y504	O43556;A0A2R8Y821;O43556-4;A0A2R8Y504;A0A2R8Y4P8;A0A2R8YGQ3;A0A2R8Y5R7;A0A2R8Y4X1;A0A2R8Y5X5;A0A2R8Y6V3;B7Z2R4;A0A2R8Y5M2;A0A2R8Y4E3;A0A2R8Y5H7;A0A2R8Y638;A0A2R8Y5P8;E9PEH6;A0A2U3TZN7;A0A2R8Y5J6;A0A2R8YE16;A0A2R8Y6Y5;A0A2R8Y621;A0A2R8Y5X0;C9JR67;A0A2R8YEY2;A0A2R8Y7J1;A0A2R8Y2R1;A0A2R8YD68;A0A2R8Y416;A0A2R8Y6U6;A0A2R8YH84;A0A2R8YFA5;O43556-3;A0A2R8Y628;A0A2R8Y5J3;A0A2R8Y5Q3;A0A2R8YE48;A0A2R8Y6G8;A…	Epsilon-sarcoglycan OS=Homo sapiens OX=9606 GN=SGCE PE=1 SV=1	8	8	67								22.6293	23.1108	-0.4815	0	0	FDR <= 0.01	22.3833	23.1108	-0.7275	0	0	FDR <= 0.01
8368	P13674-2	P13674-2;P13674-3	Isoform 2 of Prolyl 4-hydroxylase subunit alpha-1 OS=Homo sapiens OX=9606 GN=P4HA1	28	1	292	cell organization and biogenesis;metabolic process	endoplasmic reticulum;membrane;mitochondrion;organelle lumen	catalytic activity;metal ion binding;protein binding	P4HA1		Arginine and proline metabolism; Metabolic pathways		26.5188	26.4607	0.0581	0.1182	0.189	FDR > 0.05	25.9737	26.4607	-0.487	0	0	FDR <= 0.01
6559	P43490	P43490;A0A0C4DFS8;C9JG65	Nicotinamide phosphoribosyltransferase OS=Homo sapiens OX=9606 GN=NAMPT PE=1 SV=1	24	24	247	cell communication;metabolic process;regulation of biological process;response to stimulus	cytoplasm;cytosol;extracellular;nucleus	catalytic activity;protein binding	NAMPT	Adipogenesis; NAD metabolism, sirtuins and aging; NAD+ metabolism; NAD+ biosynthetic pathways	Metabolic pathways; NOD-like receptor signaling pathway; Nicotinate and nicotinamide metabolism	BMAL1:CLOCK,NPAS2 activates circadian gene expression; Nicotinamide salvaging	25.2059	25.2226	-0.0167	0.6063	0.6934	FDR > 0.05	26.2647	25.2226	1.0421	0	0	FDR <= 0.01											-0.6445	-0.6855	-0.7237	-0.639	-0.581	-0.7196	1.3632	1.2439	1.3862	1
1579	P51610	P51610;P51610-2;H7C1C4	Host cell factor 1 OS=Homo sapiens OX=9606 GN=HCFC1 PE=1 SV=2	27	1	148	cell organization and biogenesis;metabolic process;regulation of biological process;response to stimulus	cytoplasm;membrane;nucleus	catalytic activity;protein binding	HCFC1	Mitochondrial Gene Expression	Herpes simplex infection	Transcriptional activation of mitochondrial biogenesis; HATs acetylate histones; UCH proteinases	17.7533	17.8682	-0.1149	0.1241	0.1965	FDR > 0.05	17.8454	17.8682	-0.0228	0.7415	0.7895	FDR > 0.05																					Matrisome-associated	Secreted Factors
1113	Q9Y3Z3	Q9Y3Z3;A0A2R8YCS7;Q9Y3Z3-4;Q9Y3Z3-3;A0A2R8YD90;A0A2R8YF51;A0A2R8Y5D2;A0A2R8Y586;A0A2R8Y6J9;A0A2R8Y755;A0A2R8YG48;A0A2R8Y7R5;A0A2R8YFV6;A0A2R8YF18	Deoxynucleoside triphosphate triphosphohydrolase SAMHD1 OS=Homo sapiens OX=9606 GN=SAMHD1 PE=1 SV=2	17	17	101	cell organization and biogenesis;defense response;metabolic process;regulation of biological process;response to stimulus	membrane;nucleus	catalytic activity;metal ion binding;nucleotide binding;protein binding;RNA binding	SAMHD1			Nucleobase catabolism; Interferon alpha/beta signaling	22.1743	22.6549	-0.4805	0	0.0001	FDR <= 0.01	22.8246	22.6549	0.1697	0.0069	0.0143	FDR <= 0.05
2592	P52948	P52948-6;P52948-5;P52948;P52948-2;A0A3B3ITD8;H7C3P6;P52948-3;P52948-4;H0YCR0;H0YEN4;H0YDF4	Nuclear pore complex protein Nup98-Nup96 OS=Homo sapiens OX=9606 GN=NUP98 PE=1 SV=4	35	35	182	cell organization and biogenesis;metabolic process;regulation of biological process;transport	chromosome;cytosol;membrane;nucleus	catalytic activity;protein binding;RNA binding;structural molecule activity;transporter activity	NUP98		Influenza A; RNA transport		23.2782	23.2847	-0.0065	0.8144	0.8628	FDR > 0.05	23.2338	23.2847	-0.0509	0.0957	0.1386	FDR > 0.05
372	P54578	P54578;A6NJA2;P54578-2;P54578-3	Ubiquitin carboxyl-terminal hydrolase 14 OS=Homo sapiens OX=9606 GN=USP14 PE=1 SV=3	21	21	178	cell communication;metabolic process;regulation of biological process	cell surface;cytoplasm;cytosol;membrane;nucleus;proteasome	catalytic activity;enzyme regulator activity;protein binding	USP14			Ub-specific processing proteases	24.3172	24.3236	-0.0064	0.8564	0.8953	FDR > 0.05	24.2796	24.3236	-0.044	0.2328	0.2986	FDR > 0.05
280	Q12929	A0A2R8YE63;Q12929;A0A2R8Y4W2;Q12929-2;F5H0R8;F5H3Q6;F5GYM8;H0YFG1	Epidermal growth factor receptor kinase substrate 8 OS=Homo sapiens OX=9606 GN=EPS8 PE=1 SV=1	28	28	219	cell organization and biogenesis;cell proliferation;cellular component movement;regulation of biological process;response to stimulus	cytoplasm;membrane	protein binding	EPS8	EGF/EGFR Signaling Pathway			23.9902	23.8927	0.0975	0.011	0.0267	FDR <= 0.05	23.8597	23.8927	-0.033	0.2975	0.3677	FDR > 0.05
5669	Q9NYI0	Q9NYI0-2;Q9NYI0;E5RJ29;Q9NYI0-3;B4DKF8;A0A087X1Z0;A0A087WXD8;E5RFG7;E5RH02;H0YC20;E5RJE4	PH and SEC7 domain-containing protein 3 OS=Homo sapiens OX=9606 GN=PSD3 PE=1 SV=2	31	30	190	regulation of biological process	membrane		PSD3		Endocytosis		24.2389	24.2354	0.0034	0.9028	0.9279	FDR > 0.05	24.1531	24.2354	-0.0823	0.0164	0.0303	FDR <= 0.05
5630	Q8IVB4	Q8IVB4;C9IZP1	Sodium/hydrogen exchanger 9 OS=Homo sapiens OX=9606 GN=SLC9A9 PE=1 SV=1	4	4	13	cellular homeostasis;transport	endosome;membrane	protein binding;transporter activity	SLC9A9			Defective SLC9A9 causes autism 16 (AUTS16); Sodium/Proton exchangers	20.9471	21.4276	-0.4804	0	0.0001	FDR <= 0.01	21.3782	21.4276	-0.0494	0.3381	0.4088	FDR > 0.05
7772	Q9BYC8	Q9BYC8	39S ribosomal protein L32, mitochondrial OS=Homo sapiens OX=9606 GN=MRPL32 PE=1 SV=1	4	4	20	cell organization and biogenesis;metabolic process	membrane;mitochondrion;ribosome	RNA binding;structural molecule activity	MRPL32		Ribosome	Mitochondrial translation initiation; Mitochondrial translation elongation; Mitochondrial translation termination	20.0736	20.5537	-0.4801	0	0	FDR <= 0.01	20.2915	20.5537	-0.2622	0.0001	0.0003	FDR <= 0.01
6745	A0A087WXL6	A0A087WXL6;Q9H270;B7Z879;A0A0G2JS92;A0A087X2J4	Vacuolar protein sorting-associated protein 11 homolog OS=Homo sapiens OX=9606 GN=VPS11 PE=1 SV=1	31	31	157	cell organization and biogenesis;metabolic process;regulation of biological process;transport	endosome;membrane;vacuole	metal ion binding;nucleotide binding;protein binding	VPS11				23.2109	23.2042	0.0066	0.8302	0.8748	FDR > 0.05	23.3067	23.2042	0.1025	0.0091	0.0182	FDR <= 0.05
287	P35658	P35658;P35658-4;A0A494C1F2;P35658-5;P35658-3;P35658-2;A0A0A0MSW3;A0A494BZU9;H0YF36;H0Y837;E9PKD2;B7ZAV2;A0A494C0J0	Nuclear pore complex protein Nup214 OS=Homo sapiens OX=9606 GN=NUP214 PE=1 SV=2	32	32	198	cell organization and biogenesis;cellular component movement;metabolic process;regulation of biological process;response to stimulus;transport	cytosol;nucleus	protein binding;structural molecule activity;transporter activity	NUP214	TGF-beta Signaling Pathway	Epstein-Barr virus infection; RNA transport	Rev-mediated nuclear export of HIV RNA; ISG15 antiviral mechanism; NEP/NS2 Interacts with the Cellular Export Machinery; tRNA processing in the nucleus; Transcriptional regulation by small RNAs; Nuclear Pore Complex (NPC) Disassembly; Regulation of Glucokinase by Glucokinase Regulatory Protein; Vpr-mediated nuclear import of PICs; Regulation of HSF1-mediated heat shock response; snRNP Assembly; S…	23.3644	23.3288	0.0356	0.4123	0.5154	FDR > 0.05	23.2563	23.3288	-0.0725	0.1163	0.1641	FDR > 0.05
6941	Q9BQG0	Q9BQG0-2;Q9BQG0;I3L1L3;I3L2H8	Myb-binding protein 1A OS=Homo sapiens OX=9606 GN=MYBBP1A PE=1 SV=2	28	28	171	cell communication;cell differentiation;metabolic process;regulation of biological process;response to stimulus;transport	cytoplasm;membrane;nucleus	catalytic activity;DNA binding;protein binding;RNA binding	MYBBP1A	Energy Metabolism		B-WICH complex positively regulates rRNA expression	22.838	22.8613	-0.0233	0.3177	0.4181	FDR > 0.05	22.7932	22.8613	-0.0681	0.0144	0.027	FDR <= 0.05
4207	Q6UX15	Q6UX15;Q6UX15-2	Layilin OS=Homo sapiens OX=9606 GN=LAYN PE=2 SV=1	2	2	8		cell surface;membrane		LAYN				18.8948	19.3747	-0.4799	0	0	FDR <= 0.01	19.1525	19.3747	-0.2223	0.0001	0.0005	FDR <= 0.01
1593	Q9UNP4	A0A1W2PRC6;Q9UNP4-2;Q9UNP4;A0A1W2PQR0;Q9UNP4-3;A0A1W2PRY1;A0A1W2PRD9;A0A1W2PQQ6;A0A0S2Z4Q7;A0A1W2PR45;A0A1X7SBT2	Lactosylceramide alpha-2,3-sialyltransferase OS=Homo sapiens OX=9606 GN=ST3GAL5 PE=1 SV=4	3	3	11	metabolic process	Golgi;membrane	catalytic activity	ST3GAL5	Ganglio Sphingolipid Metabolism	Metabolic pathways; Glycosphingolipid biosynthesis - ganglio series	Sialic acid metabolism	17.7159	18.1945	-0.4786	0.0001	0.0005	FDR <= 0.01	17.7288	18.1945	-0.4657	0.0001	0.0004	FDR <= 0.01
5730	P78347	A0A494C1K3;P78347-4;P78347-2;P78347-3;P78347;P78347-5;A0A494C0Q7	General transcription factor II-I OS=Homo sapiens OX=9606 GN=GTF2I PE=1 SV=2	27	27	170	cellular homeostasis;metabolic process;regulation of biological process;response to stimulus	cytoplasm;membrane;nucleus	DNA binding;protein binding	GTF2I	B Cell Receptor Signaling Pathway	Basal transcription factors; Herpes simplex infection; cGMP-PKG signaling pathway		24.0901	23.9535	0.1366	0.0072	0.0188	FDR <= 0.05	23.8359	23.9535	-0.1176	0.0151	0.0281	FDR <= 0.05
2295	P0C221	P0C221;A0A0A0MTQ8	Coiled-coil domain-containing protein 175 OS=Homo sapiens OX=9606 GN=CCDC175 PE=4 SV=2	2	1	5				CCDC175				19.9953	20.4732	-0.4779	0	0.0002	FDR <= 0.01	20.096	20.4732	-0.3772	0.0001	0.0004	FDR <= 0.01
2121	O75390	O75390;B4DJV2;A0A0C4DGI3;F8VTT8;F8W4S1;H0YH82;F8VU34;F8VRI6;F8VPA1;F8VWQ5;F8VR34	Citrate synthase, mitochondrial OS=Homo sapiens OX=9606 GN=CS PE=1 SV=2	12	8	209	metabolic process	mitochondrion;nucleus;organelle lumen	catalytic activity;RNA binding	CS	TCA Cycle and Deficiency of Pyruvate Dehydrogenase complex (PDHc); Amino Acid metabolism; TCA Cycle	Metabolic pathways; Carbon metabolism; Glyoxylate and dicarboxylate metabolism; Biosynthesis of amino acids; 2-Oxocarboxylic acid metabolism; Citrate cycle (TCA cycle)	Mitochondrial protein import; Metabolism of proteins; Citric acid cycle (TCA cycle)	24.739	25.2121	-0.4731	0	0.0002	FDR <= 0.01	24.9839	25.2121	-0.2282	0.0029	0.0068	FDR <= 0.01
4087	Q9H2U2	Q9H2U2;Q9H2U2-2;Q9H2U2-3;Q9H2U2-6;D6RGV9;Q9H2U2-4;H0Y9D8;D6RGI1;D6R967;D6RAD3;H0YAK2	Inorganic pyrophosphatase 2, mitochondrial OS=Homo sapiens OX=9606 GN=PPA2 PE=1 SV=2	18	15	157	metabolic process	cytoplasm;mitochondrion;organelle lumen	catalytic activity;metal ion binding	PPA2		Oxidative phosphorylation	Mitochondrial tRNA aminoacylation; Pyrophosphate hydrolysis	23.8573	24.3341	-0.4768	0	0	FDR <= 0.01	23.8539	24.3341	-0.4802	0	0	FDR <= 0.01
5228	A0A140TA86	Q5XKP0;A0A140TA86;A0A140TA84;K7EIR2	MICOS complex subunit MIC13 OS=Homo sapiens OX=9606 GN=MICOS13 PE=1 SV=1	5	5	78	cell organization and biogenesis	membrane;mitochondrion		C19orf70				22.9714	23.4472	-0.4758	0	0	FDR <= 0.01	23.0297	23.4472	-0.4175	0	0	FDR <= 0.01
1318	Q7Z7K0	Q7Z7K0	COX assembly mitochondrial protein homolog OS=Homo sapiens OX=9606 GN=CMC1 PE=1 SV=1	2	2	12		mitochondrion	metal ion binding	CMC1				20.1504	20.6262	-0.4758	0	0	FDR <= 0.01	20.9692	20.6262	0.343	0	0.0002	FDR <= 0.01
2250	Q5T1B5	Q14642;Q5T1B5;H0Y2W5	Inositol polyphosphate-5-phosphatase A OS=Homo sapiens OX=9606 GN=INPP5A PE=1 SV=1	5	5	24	metabolic process;regulation of biological process;response to stimulus	membrane	catalytic activity;protein binding	INPP5A				20.5539	21.0288	-0.4749	0	0	FDR <= 0.01	20.3059	21.0288	-0.7229	0	0	FDR <= 0.01
2173	O95831	O95831-3;O95831;O95831-2;E9PMA0;O95831-5;O95831-6;O95831-4	Apoptosis-inducing factor 1, mitochondrial OS=Homo sapiens OX=9606 GN=AIFM1 PE=1 SV=1	22	22	243	cell death;cell differentiation;cell organization and biogenesis;cellular homeostasis;metabolic process;regulation of biological process;response to stimulus	cytoplasm;cytosol;membrane;mitochondrion;nucleus	catalytic activity;DNA binding;nucleotide binding;protein binding	AIFM1	Apoptosis Modulation and Signaling; Nanomaterial induced apoptosis; Apoptosis Modulation by HSP70	Apoptosis		24.0542	24.5289	-0.4746	0	0	FDR <= 0.01	24.456	24.5289	-0.0729	0.0182	0.033	FDR <= 0.05
52	A0A087X2I1	A0A087X2I1;P62333;H0YJC0;H0YJS8;H0YJX2;H0YJT1;H0YJE9	26S proteasome regulatory subunit 10B OS=Homo sapiens OX=9606 GN=PSMC6 PE=1 SV=1	21	21	271	metabolic process;regulation of biological process;response to stimulus;transport	cytoplasm;cytosol;membrane;nucleus;proteasome	catalytic activity;nucleotide binding;protein binding;RNA binding	PSMC6	Proteasome Degradation; Parkin-Ubiquitin Proteasomal System pathway	Epstein-Barr virus infection; Proteasome		25.1954	25.2492	-0.0538	0.1582	0.2402	FDR > 0.05	25.1995	25.2492	-0.0497	0.1887	0.2496	FDR > 0.05
7269	O95644	O95644-6;O95644;O95644-5;O95644-4;F5H4S8;O95644-11;O95644-10;O95644-17;O95644-3;O95644-2;O95644-8;K7ER53	Nuclear factor of activated T-cells, cytoplasmic 1 OS=Homo sapiens OX=9606 GN=NFATC1 PE=1 SV=3	6	5	22	metabolic process;regulation of biological process;response to stimulus	cytoplasm;cytosol;nucleus	DNA binding;protein binding	NFATC1	Heart Development; RANKL/RANK (Receptor activator of NFKB (ligand)) Signaling Pathway; Ectoderm Differentiation; Initiation of transcription and translation elongation at the HIV-1 LTR; MAPK Signaling Pathway; VEGFA-VEGFR2 Signaling Pathway; T-Cell antigen Receptor (TCR) Signaling Pathway	HTLV-I infection; MAPK signaling pathway; T cell receptor signaling pathway; Natural killer cell mediated cytotoxicity; cGMP-PKG signaling pathway; Th1 and Th2 cell differentiation; Wnt signaling pathway; Osteoclast differentiation; AGE-RAGE signaling pathway in diabetic complications; Inflammatory bowel disease (IBD); Oxytocin signaling pathway; B cell receptor signaling pathway; cAMP signaling …	FCERI mediated Ca+2 mobilization; Ca2+ pathway; CLEC7A (Dectin-1) induces NFAT activation; Calcineurin activates NFAT	17.5561	18.0299	-0.4738	0.0001	0.0006	FDR <= 0.01	18.6352	18.0299	0.6054	0	0.0001	FDR <= 0.01
8349	Q9Y2L5	Q9Y2L5;J3QQJ5;Q9Y2L5-2;J3KSL8;J3QSA1;J3QR00;J3QQS5	Trafficking protein particle complex subunit 8 OS=Homo sapiens OX=9606 GN=TRAPPC8 PE=1 SV=2	36	36	161	cell organization and biogenesis;metabolic process;transport	cytosol;Golgi	protein binding	TRAPPC8			RAB GEFs exchange GTP for GDP on RABs	23.1873	23.1952	-0.0079	0.7979	0.85	FDR > 0.05	23.3534	23.1952	0.1582	0.0007	0.0021	FDR <= 0.01
6271	P36542	P36542-2;P36542	ATP synthase subunit gamma, mitochondrial OS=Homo sapiens OX=9606 GN=ATP5F1C PE=1 SV=1	11	10	125	cell organization and biogenesis;metabolic process;transport	membrane;mitochondrion;organelle lumen	catalytic activity;RNA binding;transporter activity	ATP5C1	Electron Transport Chain	Huntington's disease; Alzheimer's disease; Oxidative phosphorylation; Parkinson's disease; Metabolic pathways	Cristae formation; Formation of ATP by chemiosmotic coupling	24.7901	25.2582	-0.4681	0	0.0001	FDR <= 0.01	24.8848	25.2582	-0.3734	0.0001	0.0002	FDR <= 0.01
603	P40763	P40763;P40763-3;G8JLH9	Signal transducer and activator of transcription 3 OS=Homo sapiens OX=9606 GN=STAT3 PE=1 SV=2	26	1	135	cell differentiation;cell organization and biogenesis;cell proliferation;cellular component movement;defense response;metabolic process;regulation of biological process;reproduction;response to stimulus;transport	cytoplasm;cytosol;membrane;mitochondrion;nucleus	DNA binding;protein binding;signal transducer activity	STAT3	IL-5 Signaling Pathway; Androgen receptor signaling pathway; Physiological and Pathological Hypertrophy of the Heart; MicroRNAs in cardiomyocyte hypertrophy; TFs Regulate miRNAs related to cardiac hypertrophy; Cell Differentiation - Index; Human Thyroid Stimulating Hormone (TSH) signaling pathway; Leptin signaling pathway; Prolactin Signaling Pathway; Regulation of Microtubule Cytoskeleton; IL-7 …	Hepatitis B; Chemokine signaling pathway; Toxoplasmosis; Acute myeloid leukemia; Pancreatic cancer; Insulin resistance; Viral carcinogenesis; Measles; AGE-RAGE signaling pathway in diabetic complications; MicroRNAs in cancer; Jak-STAT signaling pathway; FoxO signaling pathway; Adipocytokine signaling pathway; EGFR tyrosine kinase inhibitor resistance; HIF-1 signaling pathway; Signaling pathways r…	Interleukin-15 signaling; Signaling by Leptin; POU5F1 (OCT4), SOX2, NANOG activate genes related to proliferation; Interleukin-35 Signalling; Interleukin-10 signaling; Interleukin-7 signaling; Downstream signal transduction; Signalling to STAT3; Association of TriC/CCT with target proteins during biosynthesis; Signaling by cytosolic FGFR1 fusion mutants; MET activates STAT3; Signaling by SCF-KIT;…	17.8241	18.2814	-0.4573	0.0294	0.0605	FDR > 0.05	18.1952	18.2814	-0.0862	0.6314	0.6893	FDR > 0.05
829	H0Y9Y3	Q9UMS6-2;H0Y9Y3;Q9UMS6-4	Synaptopodin-2 (Fragment) OS=Homo sapiens OX=9606 GN=SYNPO2 PE=1 SV=1	12	1	59		cytoskeleton;cytosol	protein binding					20.9052	21.3779	-0.4726	0.0002	0.001	FDR <= 0.01	21.4537	21.3779	0.0758	0.3316	0.4021	FDR > 0.05
4311	P48634	P48634;P48634-3;P48634-2;P48634-4	Protein PRRC2A OS=Homo sapiens OX=9606 GN=PRRC2A PE=1 SV=3	32	29	152	cell differentiation	cytoplasm;membrane;nucleus	protein binding;RNA binding	PRRC2A				22.4883	22.4344	0.054	0.172	0.2572	FDR > 0.05	22.4546	22.4344	0.0203	0.5884	0.6507	FDR > 0.05
624	Q7Z2W4	Q7Z2W4;Q7Z2W4-2	Zinc finger CCCH-type antiviral protein 1 OS=Homo sapiens OX=9606 GN=ZC3HAV1 PE=1 SV=3	26	1	225	defense response;metabolic process;regulation of biological process;response to stimulus	cytoplasm;cytosol;nucleus	catalytic activity;metal ion binding;nucleotide binding;protein binding;RNA binding	ZC3HAV1			Signaling by BRAF and RAF fusions	18.9892	18.867	0.1222	0.148	0.2275	FDR > 0.05	19.0036	18.867	0.1366	0.1113	0.158	FDR > 0.05
118	B4E3S0	B4E3S0;F8VV53	Coronin OS=Homo sapiens OX=9606 GN=CORO1C PE=1 SV=1	23	1	285	cell organization and biogenesis;cellular component movement;regulation of biological process;response to stimulus;transport	cytoplasm;cytoskeleton	protein binding	CORO1C				13.6793	13.742	-0.0627	0.8188	0.8661	FDR > 0.05	13.5539	13.742	-0.1881	0.4977	0.5639	FDR > 0.05
5421	P61978	P61978-2;P61978	Heterogeneous nuclear ribonucleoprotein K OS=Homo sapiens OX=9606 GN=HNRNPK PE=1 SV=1	20	1	360	metabolic process;regulation of biological process;response to stimulus	cytoplasm;membrane;nucleus;spliceosomal complex	DNA binding;protein binding;RNA binding	HNRNPK	mRNA Processing	MicroRNAs in cancer; Herpes simplex infection; Spliceosome; Viral carcinogenesis	mRNA Splicing - Major Pathway; SUMOylation of RNA binding proteins	21.2095	20.9218	0.2877	0.0044	0.0125	FDR <= 0.05	20.9883	20.9218	0.0665	0.3916	0.463	FDR > 0.05
5542	Q96FN9	Q96FN9	D-aminoacyl-tRNA deacylase 2 OS=Homo sapiens OX=9606 GN=DTD2 PE=1 SV=1	2	2	7	metabolic process;regulation of biological process	cytoplasm	catalytic activity;protein binding	DTD2				16.2607	16.7327	-0.472	0.0023	0.0073	FDR <= 0.01	16.1144	16.7327	-0.6183	0.0004	0.0013	FDR <= 0.01
4901	Q10713	Q10713;Q10713-2;Q5SXN9	Mitochondrial-processing peptidase subunit alpha OS=Homo sapiens OX=9606 GN=PMPCA PE=1 SV=2	15	15	98	metabolic process;transport	membrane;mitochondrion;organelle lumen	catalytic activity;metal ion binding	PMPCA			Processing of SMDT1; Mitochondrial protein import; Metabolism of proteins	22.3444	22.816	-0.4717	0	0	FDR <= 0.01	22.5975	22.816	-0.2186	0.0001	0.0003	FDR <= 0.01
5424	Q86XE3	Q86XE3;H0YAN7	Calcium uptake protein 3, mitochondrial OS=Homo sapiens OX=9606 GN=MICU3 PE=1 SV=1	3	3	5	transport	membrane;mitochondrion	metal ion binding	EFHA2; MICU3			Processing of SMDT1	18.8481	19.3196	-0.4714	0	0.0001	FDR <= 0.01	19.5451	19.3196	0.2255	0.0008	0.0023	FDR <= 0.01
2724	Q9UI08	Q9UI08-4;Q9UI08-2;Q9UI08-5;Q9UI08;G3V314;Q9UI08-3;H0YJN0	Ena/VASP-like protein OS=Homo sapiens OX=9606 GN=EVL PE=1 SV=2	4	3	14	cell organization and biogenesis;cellular component movement;regulation of biological process;response to stimulus	cytoplasm;cytoskeleton;cytosol;membrane	protein binding	EVL			RHO GTPases Activate Formins; Generation of second messenger molecules; Signaling by ROBO receptors	15.1206	15.5915	-0.4709	0.0001	0.0006	FDR <= 0.01	15.5649	15.5915	-0.0266	0.696	0.7481	FDR > 0.05
2023	O75534	O75534;O75534-4;O75534-2;O75534-3;E9PLT0;E9PLD4;E9PNG3	Cold shock domain-containing protein E1 OS=Homo sapiens OX=9606 GN=CSDE1 PE=1 SV=2	33	33	270	metabolic process;regulation of biological process	cytoplasm;cytosol;Golgi;membrane	DNA binding;protein binding;RNA binding	CSDE1				25.8009	25.7314	0.0696	0.0213	0.0465	FDR <= 0.05	26.0277	25.7314	0.2963	0	0	FDR <= 0.01
5761	A6NEM2	P51610-4;A6NEM2	Host cell factor 1 OS=Homo sapiens OX=9606 GN=HCFC1 PE=1 SV=2	27	1	147	cell organization and biogenesis;metabolic process;regulation of biological process;response to stimulus	cytoplasm;membrane;nucleus	catalytic activity;protein binding	HCFC1	Mitochondrial Gene Expression			23.5282	23.3884	0.1398	0.0188	0.0418	FDR <= 0.05	23.3015	23.3884	-0.0869	0.1054	0.1508	FDR > 0.05																					Matrisome-associated	Secreted Factors
7422	F5GX39	F5GX39	Transmembrane emp24 domain-containing protein 2 OS=Homo sapiens OX=9606 GN=TMED2 PE=1 SV=1	7	1	239	transport	membrane						17.9383	18.4087	-0.4703	0	0.0002	FDR <= 0.01	17.943	18.4087	-0.4657	0	0.0001	FDR <= 0.01
7605	Q8TCC3	Q8TCC3-2;Q8TCC3;Q8TCC3-3;B8ZZV5	39S ribosomal protein L30, mitochondrial OS=Homo sapiens OX=9606 GN=MRPL30 PE=1 SV=1	4	4	23	cell organization and biogenesis;metabolic process	membrane;mitochondrion;ribosome	structural molecule activity	MRPL30		Ribosome	Mitochondrial translation initiation; Mitochondrial translation elongation; Mitochondrial translation termination	18.3208	18.7906	-0.4698	0.0003	0.0015	FDR <= 0.01	18.5514	18.7906	-0.2392	0.0161	0.0298	FDR <= 0.05
3828	A0A2R8YEA7	A0A2R8YEA7	Actin, cytoplasmic 1 (Fragment) OS=Homo sapiens OX=9606 GN=ACTB PE=1 SV=1	10	2	741								19.9877	19.9197	0.068	0.307	0.4071	FDR > 0.05	19.9074	19.9197	-0.0123	0.8479	0.8772	FDR > 0.05
4926	Q8TB36	Q8TB36-2;Q8TB36	Ganglioside-induced differentiation-associated protein 1 OS=Homo sapiens OX=9606 GN=GDAP1 PE=1 SV=3	4	4	20	cell communication;cell organization and biogenesis;metabolic process;response to stimulus;transport	cytoplasm;cytosol;membrane;mitochondrion;nucleus	catalytic activity;protein binding	GDAP1				20.8465	21.3154	-0.4689	0	0	FDR <= 0.01	20.9844	21.3154	-0.331	0	0	FDR <= 0.01
5080	Q92629	Q92629;Q92629-2;Q92629-3	Delta-sarcoglycan OS=Homo sapiens OX=9606 GN=SGCD PE=1 SV=2	12	12	96	cell organization and biogenesis	cytoplasm;cytoskeleton;membrane		SGCD	Arrhythmogenic Right Ventricular Cardiomyopathy	Viral myocarditis; Arrhythmogenic right ventricular cardiomyopathy (ARVC); Hypertrophic cardiomyopathy (HCM); Dilated cardiomyopathy		22.9084	23.3771	-0.4687	0	0	FDR <= 0.01	22.7326	23.3771	-0.6445	0	0	FDR <= 0.01
5752	P25705	P25705;P25705-3;K7ERX7;K7ESA0	ATP synthase subunit alpha, mitochondrial OS=Homo sapiens OX=9606 GN=ATP5F1A PE=1 SV=1	29	1	589	cell organization and biogenesis;metabolic process;regulation of biological process;transport	membrane;mitochondrion;organelle lumen	catalytic activity;nucleotide binding;protein binding;RNA binding;transporter activity	ATP5A1	Electron Transport Chain; Oxidative phosphorylation	Metabolic pathways; Parkinson's disease; Alzheimer's disease; Oxidative phosphorylation; Huntington's disease	Cristae formation; Mitochondrial protein import; Formation of ATP by chemiosmotic coupling; Metabolism of proteins	27.5857	28.0518	-0.4661	0	0	FDR <= 0.01	27.7061	28.0518	-0.3457	0	0	FDR <= 0.01
125	P53597	P53597;A0A494C0D1;H7C233	Succinate--CoA ligase [ADP/GDP-forming] subunit alpha, mitochondrial OS=Homo sapiens OX=9606 GN=SUCLG1 PE=1 SV=4	9	9	102	metabolic process	cytosol;membrane;mitochondrion;organelle lumen	catalytic activity;nucleotide binding;RNA binding	SUCLG1	Amino Acid metabolism; TCA Cycle	Metabolic pathways; Citrate cycle (TCA cycle); Carbon metabolism; Propanoate metabolism	Citric acid cycle (TCA cycle)	23.6564	24.124	-0.4676	0	0.0001	FDR <= 0.01	23.8573	24.124	-0.2667	0.0003	0.0011	FDR <= 0.01
1343	Q8NFC6	Q8NFC6	Biorientation of chromosomes in cell division protein 1-like 1 OS=Homo sapiens OX=9606 GN=BOD1L1 PE=1 SV=2	34	33	147	metabolic process;response to stimulus	chromosome		BOD1L1				22.4175	22.3197	0.0978	0.0488	0.0916	FDR > 0.05	22.0929	22.3197	-0.2268	0.0007	0.0019	FDR <= 0.01
5568	Q96I99	Q96I99;E9PDQ8;Q96I99-2;H0Y852	Succinate--CoA ligase [GDP-forming] subunit beta, mitochondrial OS=Homo sapiens OX=9606 GN=SUCLG2 PE=1 SV=2	21	20	160	metabolic process	membrane;mitochondrion;organelle lumen	catalytic activity;metal ion binding;nucleotide binding;protein binding	SUCLG2	TCA Cycle and Deficiency of Pyruvate Dehydrogenase complex (PDHc); TCA Cycle	Carbon metabolism; Metabolic pathways; Propanoate metabolism; Citrate cycle (TCA cycle)	Citric acid cycle (TCA cycle)	24.7453	25.2104	-0.4651	0	0	FDR <= 0.01	25.0405	25.2104	-0.1699	0.0003	0.001	FDR <= 0.01
2444	Q96RT1	Q96RT1;Q96RT1-8;Q96RT1-5;Q96RT1-3;Q96RT1-2;Q96RT1-9;Q96RT1-7;Q96RT1-6;Q96RT1-4;B4DIP2;H0YA04;H0Y9E8	Erbin OS=Homo sapiens OX=9606 GN=ERBIN PE=1 SV=2	35	35	180	cell growth;cell organization and biogenesis;regulation of biological process;response to stimulus;transport	cytoplasm;membrane;nucleus	protein binding;structural molecule activity	ERBB2IP; ERBIN	Nucleotide-binding Oligomerization Domain (NOD) pathway; NLR Proteins; Pathways Affected in Adenoid Cystic Carcinoma	NOD-like receptor signaling pathway	Downregulation of ERBB2 signaling	22.7916	22.7501	0.0415	0.2306	0.3251	FDR > 0.05	23.1396	22.7501	0.3895	0	0	FDR <= 0.01
5388	Q8N5G0	Q8N5G0-2;Q8N5G0	Small integral membrane protein 20 OS=Homo sapiens OX=9606 GN=SMIM20 PE=1 SV=3	3	3	21	cell organization and biogenesis	membrane;mitochondrion	protein binding	C4orf52; SMIM20				20.4256	20.8912	-0.4656	0	0	FDR <= 0.01	20.5784	20.8912	-0.3128	0	0.0002	FDR <= 0.01
1165	P12236	P12236	ADP/ATP translocase 3 OS=Homo sapiens OX=9606 GN=SLC25A6 PE=1 SV=4	16	3	261	cell death;cell organization and biogenesis;regulation of biological process;response to stimulus;transport	membrane;mitochondrion;nucleus	protein binding;transporter activity	SLC25A6	Electron Transport Chain	Calcium signaling pathway; HTLV-I infection; Influenza A; Huntington's disease; Parkinson's disease; cGMP-PKG signaling pathway	Mitochondrial protein import; Regulation of insulin secretion; Vpr-mediated induction of apoptosis by mitochondrial outer membrane permeabilization; Influenza Virus Induced Apoptosis; Metabolism of proteins	27.1669	27.6109	-0.444	0	0	FDR <= 0.01	27.3515	27.6109	-0.2594	0	0	FDR <= 0.01
1439	Q8N3D4	Q8N3D4;E9PIH6;H0YDZ9;A0A0U1RQH4	EH domain-binding protein 1-like protein 1 OS=Homo sapiens OX=9606 GN=EHBP1L1 PE=1 SV=2	28	27	157		endosome;membrane	protein binding	EHBP1L1				23.1681	23.0898	0.0784	0.0909	0.153	FDR > 0.05	23.1302	23.0898	0.0404	0.3504	0.4213	FDR > 0.05
578	P78357	P78357;K7EMM9	Contactin-associated protein 1 OS=Homo sapiens OX=9606 GN=CNTNAP1 PE=1 SV=1	23	23	175	cell organization and biogenesis;regulation of biological process;response to stimulus	membrane	protein binding;receptor activity	CNTNAP1		Cell adhesion molecules (CAMs)	Neurofascin interactions	23.383	23.3993	-0.0163	0.5833	0.6731	FDR > 0.05	23.0423	23.3993	-0.357	0	0	FDR <= 0.01
2717	Q7L2E3-2	Q7L2E3-2;H7BXY3;Q7L2E3;Q7L2E3-3	Isoform 2 of ATP-dependent RNA helicase DHX30 OS=Homo sapiens OX=9606 GN=DHX30	33	33	171	cell organization and biogenesis;metabolic process	cytosol;mitochondrion	catalytic activity;nucleotide binding;protein binding;RNA binding	DHX30				23.1019	23.0866	0.0153	0.6161	0.7011	FDR > 0.05	23.1494	23.0866	0.0628	0.065	0.0994	FDR > 0.05
54	Q16363	A0A0A0MTC7;A0A0A0MQS9;Q16363-2;Q16363;A0A494C139;H0YAP9;A0A494C1K8;H0Y351;H0YAQ5;E5RFQ2	Laminin subunit alpha-4 OS=Homo sapiens OX=9606 GN=LAMA4 PE=1 SV=4	37	37	197	cell organization and biogenesis;regulation of biological process;transport	cytoskeleton;extracellular;membrane	catalytic activity;motor activity;protein binding;structural molecule activity	LAMA4	miRNA targets in ECM and membrane receptors; Focal Adhesion; Focal Adhesion-PI3K-Akt-mTOR-signaling pathway	Small cell lung cancer; Amoebiasis; ECM-receptor interaction; Pathways in cancer; African trypanosomiasis; Toxoplasmosis; PI3K-Akt signaling pathway; Focal adhesion	ECM proteoglycans; Laminin interactions; MET activates PTK2 signaling; Non-integrin membrane-ECM interactions	22.7658	23.2296	-0.4639	0	0	FDR <= 0.01	22.9314	23.2296	-0.2982	0	0	FDR <= 0.01																					Core matrisome	ECM Glycoproteins
975	Q3LXA3	Q3LXA3;H0YCY6;Q3LXA3-2;I3L252;E9PJG8;E9PQR1	Triokinase/FMN cyclase OS=Homo sapiens OX=9606 GN=TKFC PE=1 SV=2	23	23	150	defense response;metabolic process;regulation of biological process;response to stimulus	cytosol;nucleus	catalytic activity;metal ion binding;nucleotide binding;protein binding	DAK; TKFC	RIG-I-like Receptor Signaling	Carbon metabolism; Metabolic pathways; Glycerolipid metabolism; RIG-I-like receptor signaling pathway; Fructose and mannose metabolism	Fructose catabolism; DDX58/IFIH1-mediated induction of interferon-alpha/beta	24.0608	23.9969	0.0639	0.0911	0.1533	FDR > 0.05	23.5913	23.9969	-0.4056	0	0	FDR <= 0.01
8239	Q9BYC9	Q9BYC9;I3L2X1;Q9BYC9-2	39S ribosomal protein L20, mitochondrial OS=Homo sapiens OX=9606 GN=MRPL20 PE=1 SV=1	4	4	20	cell organization and biogenesis;metabolic process	membrane;mitochondrion;ribosome	protein binding;RNA binding;structural molecule activity	MRPL20		Ribosome	Mitochondrial translation initiation; Mitochondrial translation elongation; Mitochondrial translation termination	20.7499	21.2121	-0.4623	0	0.0001	FDR <= 0.01	20.9581	21.2121	-0.2541	0.0008	0.0022	FDR <= 0.01
5608	Q8NBN7	Q8NBN7;Q8NBN7-2;G8JLA1;K7EMY5	Retinol dehydrogenase 13 OS=Homo sapiens OX=9606 GN=RDH13 PE=1 SV=2	6	6	31	metabolic process;response to stimulus	membrane;mitochondrion	catalytic activity	RDH13			RA biosynthesis pathway	18.8972	19.3584	-0.4612	0	0.0002	FDR <= 0.01	19.0818	19.3584	-0.2766	0.0008	0.0022	FDR <= 0.01
974	P26572	P26572;D6RF69	Alpha-1,3-mannosyl-glycoprotein 2-beta-N-acetylglucosaminyltransferase OS=Homo sapiens OX=9606 GN=MGAT1 PE=1 SV=2	8	8	32	metabolic process	Golgi;membrane	catalytic activity;metal ion binding	MGAT1		N-Glycan biosynthesis; Metabolic pathways	N-glycan trimming and elongation in the cis-Golgi	21.354	21.8133	-0.4593	0	0	FDR <= 0.01	21.8327	21.8133	0.0193	0.6493	0.706	FDR > 0.05
5576	Q9NYK5	Q9NYK5;Q9NYK5-2;C9JG87	39S ribosomal protein L39, mitochondrial OS=Homo sapiens OX=9606 GN=MRPL39 PE=1 SV=3	12	12	68	cell organization and biogenesis;metabolic process	membrane;mitochondrion;ribosome	nucleotide binding;RNA binding	MRPL39			Mitochondrial translation initiation; Mitochondrial translation elongation; Mitochondrial translation termination	22.6729	23.1317	-0.4588	0	0	FDR <= 0.01	22.8015	23.1317	-0.3303	0	0.0001	FDR <= 0.01
5903	A0A286YFF8	Q7Z3U7;Q7Z3U7-5;A0A286YFF8;Q7Z3U7-2;Q7Z3U7-6;F8VZV1;Q7Z3U7-3;F8VQS2;F8VZV6	Protein MON2 homolog OS=Homo sapiens OX=9606 GN=MON2 PE=1 SV=1	35	35	205								23.8084	23.741	0.0674	0.0181	0.0405	FDR <= 0.05	23.7805	23.741	0.0396	0.1205	0.1693	FDR > 0.05
3847	Q9BUJ2	Q9BUJ2-2;Q9BUJ2;A0A0A0MRA5;Q9BUJ2-4;B7Z4B8;Q9BUJ2-3;M0R3F1;M0QYZ0;M0R0K8;M0QYI8;M0QZV6;M0R203;M0QYM5;Q9BUJ2-5	Heterogeneous nuclear ribonucleoprotein U-like protein 1 OS=Homo sapiens OX=9606 GN=HNRNPUL1 PE=1 SV=2	26	26	234	metabolic process;regulation of biological process;response to stimulus	nucleus	protein binding;RNA binding	HNRNPUL1		Influenza A	mRNA Splicing - Major Pathway	23.9702	23.9517	0.0185	0.4211	0.5234	FDR > 0.05	23.7014	23.9517	-0.2503	0	0	FDR <= 0.01
577	Q96AE4	Q96AE4;E9PEB5	Far upstream element-binding protein 1 OS=Homo sapiens OX=9606 GN=FUBP1 PE=1 SV=3	25	2	278	metabolic process;regulation of biological process	nucleus	DNA binding;protein binding;RNA binding	FUBP1				25.054	25.0843	-0.0303	0.2054	0.2964	FDR > 0.05	25.051	25.0843	-0.0333	0.1677	0.2254	FDR > 0.05
4278	Q96I59	Q96I59;E9PRK2;H0YEL9;Q96I59-2;H0YE96	Probable asparagine--tRNA ligase, mitochondrial OS=Homo sapiens OX=9606 GN=NARS2 PE=1 SV=3	11	11	43	metabolic process	cytoplasm;cytosol;mitochondrion;organelle lumen	catalytic activity;nucleotide binding	NARS2	Ectoderm Differentiation	Aminoacyl-tRNA biosynthesis	Mitochondrial tRNA aminoacylation	20.106	20.5642	-0.4581	0	0	FDR <= 0.01	20.5471	20.5642	-0.017	0.6105	0.6703	FDR > 0.05
8361	Q9BZF1	Q9BZF1-2;Q9BZF1;Q9BZF1-3;F8VQX7;F8VUA7;F8VZ43;F8VVD3;F8VVE7	Oxysterol-binding protein-related protein 8 OS=Homo sapiens OX=9606 GN=OSBPL8 PE=1 SV=3	27	25	173	cell differentiation;cell organization and biogenesis;metabolic process;regulation of biological process;transport	cytosol;endoplasmic reticulum;membrane;nucleus	transporter activity	OSBPL8			Acyl chain remodelling of PS	24.0111	23.9948	0.0163	0.5617	0.6539	FDR > 0.05	24.6711	23.9948	0.6763	0	0	FDR <= 0.01
4355	Q14005	Q14005-2;Q14005;Q14005-4;Q14005-3;H0YLH9	Pro-interleukin-16 OS=Homo sapiens OX=9606 GN=IL16 PE=1 SV=4	4	4	20	cellular component movement;metabolic process;regulation of biological process;response to stimulus	cytoplasm;cytosol;extracellular;membrane;nucleus	protein binding	IL16			Other interleukin signaling	17.1136	17.5711	-0.4574	0	0.0003	FDR <= 0.01	16.8456	17.5711	-0.7254	0	0	FDR <= 0.01																					Matrisome-associated	Secreted Factors
4753	C9IZQ1	C9IZQ1;A0A3B3IRT8;C9J5W0;E9PAL7;C9J3L8;P43307;P43307-2	Translocon-associated protein subunit alpha OS=Homo sapiens OX=9606 GN=SSR1 PE=1 SV=1	4	4	26		endoplasmic reticulum;membrane						21.6996	22.156	-0.4564	0	0	FDR <= 0.01	21.7624	22.156	-0.3937	0	0	FDR <= 0.01
7307	Q9UHG3-2	Q9UHG3-2;C9K055;C9JM55;C9JGT6	Isoform 2 of Prenylcysteine oxidase 1 OS=Homo sapiens OX=9606 GN=PCYOX1	17	1	338	metabolic process;transport	membrane;vacuole	catalytic activity;transporter activity	PCYOX1				16.9135	16.818	0.0955	0.5019	0.6025	FDR > 0.05	16.8612	16.818	0.0432	0.7585	0.8036	FDR > 0.05
6295	A0A2R8YG42	A0A2R8YG42;Q14155-1;B1ALK7;Q14155-5;Q14155;Q14155-3;Q14155-2;Q14155-6;E7EUY6;E9PDQ5;F6SJA5;E7ENL8;E7EU80;B1ANY6;C9JDI6;C9JAD7	Rho guanine nucleotide exchange factor 7 OS=Homo sapiens OX=9606 GN=ARHGEF7 PE=1 SV=1	25	21	175								23.5079	23.4562	0.0518	0.0992	0.164	FDR > 0.05	23.6398	23.4562	0.1837	0.0002	0.0006	FDR <= 0.01
6965	P56378	P56378	ATP synthase subunit ATP5MPL, mitochondrial OS=Homo sapiens OX=9606 GN=ATP5MPL PE=1 SV=1	2	2	26		membrane;mitochondrion		C14orf2				20.6321	21.0879	-0.4558	0.0002	0.0008	FDR <= 0.01	20.6168	21.0879	-0.4711	0.0001	0.0005	FDR <= 0.01
4562	Q9NX20	Q9NX20;E9PI14	39S ribosomal protein L16, mitochondrial OS=Homo sapiens OX=9606 GN=MRPL16 PE=1 SV=1	4	4	23	cell organization and biogenesis;metabolic process	membrane;mitochondrion;ribosome	RNA binding;structural molecule activity	MRPL16		Ribosome	Mitochondrial translation initiation; Mitochondrial translation elongation; Mitochondrial translation termination	20.292	20.7476	-0.4556	0.0001	0.0007	FDR <= 0.01	20.495	20.7476	-0.2526	0.0051	0.011	FDR <= 0.05
8354	Q9HD33	Q9HD33-2;Q9HD33;Q9HD33-3	39S ribosomal protein L47, mitochondrial OS=Homo sapiens OX=9606 GN=MRPL47 PE=1 SV=2	9	9	53	cell organization and biogenesis;metabolic process	membrane;mitochondrion;ribosome	structural molecule activity	MRPL47			Mitochondrial translation initiation; Mitochondrial translation elongation; Mitochondrial translation termination	20.893	21.3476	-0.4546	0.0006	0.0023	FDR <= 0.01	20.9888	21.3476	-0.3587	0.0024	0.0059	FDR <= 0.01
6780	Q13616	Q13616;A0A0C4DGX4;A0A590UJ50;A0A590UK34;A0A590UJ21;A0A590UJ56;A0A590UJR3;A0A590UJC4;A0A590UJA0;A0A590UJM8;A0A590UJ97	Cullin-1 OS=Homo sapiens OX=9606 GN=CUL1 PE=1 SV=2	27	27	161	cell death;cell organization and biogenesis;cell proliferation;cellular homeostasis;metabolic process;regulation of biological process;response to stimulus	cytosol	catalytic activity;protein binding	CUL1	TNF alpha Signaling Pathway; Parkin-Ubiquitin Proteasomal System pathway; Apoptosis-related network due to altered Notch3 in ovarian cancer; TGF-beta Signaling Pathway; Notch Signaling Pathway	Herpes simplex infection; Oocyte meiosis; Ubiquitin mediated proteolysis; Circadian rhythm; Wnt signaling pathway; TGF-beta signaling pathway; Cell cycle; Hedgehog signaling pathway; Protein processing in endoplasmic reticulum	FBXL7 down-regulates AURKA during mitotic entry and in early mitosis; NOTCH1 Intracellular Domain Regulates Transcription; Downstream TCR signaling; Regulation of PLK1 Activity at G2/M Transition; NIK-->noncanonical NF-kB signaling; MAP3K8 (TPL2)-dependent MAPK1/3 activation; Constitutive Signaling by NOTCH1 HD+PEST Domain Mutants; Antigen processing: Ubiquitination & Proteasome degradation; Iron…	23.9178	23.8254	0.0924	0.0191	0.0424	FDR <= 0.05	23.9046	23.8254	0.0792	0.0365	0.0603	FDR > 0.05
3555	C9J6P4	C9J6P4;Q7Z2W4-3	Zinc finger CCCH-type antiviral protein 1 OS=Homo sapiens OX=9606 GN=ZC3HAV1 PE=1 SV=1	26	1	213	defense response;metabolic process;regulation of biological process;response to stimulus	cytosol;nucleus	catalytic activity;metal ion binding;nucleotide binding;protein binding;RNA binding	ZC3HAV1				23.6218	23.6741	-0.0523	0.0539	0.0998	FDR > 0.05	23.7426	23.6741	0.0685	0.0182	0.0331	FDR <= 0.05
6600	P23526	P23526;P23526-2	Adenosylhomocysteinase OS=Homo sapiens OX=9606 GN=AHCY PE=1 SV=4	18	18	237	defense response;metabolic process;response to stimulus;transport	cytoplasm;cytosol;nucleus	catalytic activity;nucleotide binding;protein binding	AHCY	Folate Metabolism; Trans-sulfuration pathway; One Carbon Metabolism; Trans-sulfuration and one carbon metabolism	Cysteine and methionine metabolism; Metabolic pathways	Metabolism of ingested SeMet, Sec, MeSec into H2Se; Defective AHCY causes Hypermethioninemia with S-adenosylhomocysteine hydrolase deficiency (HMAHCHD); Sulfur amino acid metabolism; Methylation	24.29	24.3708	-0.0809	0.0102	0.0251	FDR <= 0.05	24.3788	24.3708	0.008	0.7499	0.7964	FDR > 0.05
3274	Q6UWH4	Q6UWH4;Q6UWH4-2	Golgi-associated kinase 1B OS=Homo sapiens OX=9606 GN=GASK1B PE=2 SV=1	3	3	12		Golgi;membrane		FAM198B				16.0977	16.5501	-0.4525	0	0.0002	FDR <= 0.01	16.5497	16.5501	-0.0004	0.9943	0.9955	FDR > 0.05
71	Q14C86	Q14C86;Q14C86-2;Q14C86-5;Q14C86-6;Q14C86-4;Q14C86-3;F8W9S7;C9IZ08;B4DGD8;B0QZ65;H0Y7I9;H0Y4E7;A0A0A0MQV8;C9IZX9	GTPase-activating protein and VPS9 domain-containing protein 1 OS=Homo sapiens OX=9606 GN=GAPVD1 PE=1 SV=2	31	31	150	cell organization and biogenesis;regulation of biological process;response to stimulus;transport	cytosol;endosome;membrane	enzyme regulator activity;protein binding	GAPVD1			RAB GEFs exchange GTP for GDP on RABs; Clathrin-mediated endocytosis	23.7678	23.7539	0.0138	0.6631	0.741	FDR > 0.05	23.6993	23.7539	-0.0546	0.1122	0.1592	FDR > 0.05
7945	Q1KMD3	Q1KMD3;H3BQZ7	Heterogeneous nuclear ribonucleoprotein U-like protein 2 OS=Homo sapiens OX=9606 GN=HNRNPUL2 PE=1 SV=1	25	25	244		membrane;nucleus	protein binding;RNA binding	HNRNPUL2				25.5549	25.4905	0.0644	0.0856	0.1455	FDR > 0.05	25.3144	25.4905	-0.176	0.0007	0.002	FDR <= 0.01
900	O00571	O00571-2;A0A2R8Y5G6;A0A2R8YFS5;A0A0D9SFB3;A0A2R8YCW1;O00571;A0A0D9SF53;A0A2R8Y4A4;A0A0D9SG12;A0A2R8YFR4;A0A2U3TZJ9;A0A2R8YF78;A0A2R8Y645;F6S8Q4;A0A2R8YDT5;A0A2R8Y7T2;A0A2R8YDH3;A0A2R8Y650;A0A2R8YCU0;A0A087WX09;A0A2R8YF89	ATP-dependent RNA helicase DDX3X OS=Homo sapiens OX=9606 GN=DDX3X PE=1 SV=3	28	4	296	cell death;cell organization and biogenesis;defense response;metabolic process;regulation of biological process;response to stimulus;transport	cytoplasm;cytosol;extracellular;membrane;mitochondrion;nucleus;organelle lumen	catalytic activity;DNA binding;enzyme regulator activity;nucleotide binding;protein binding;RNA binding	DDX3X	RIG-I-like Receptor Signaling	Hepatitis B; RIG-I-like receptor signaling pathway; Viral carcinogenesis	Neutrophil degranulation	25.5377	25.5219	0.0158	0.561	0.6533	FDR > 0.05	25.7654	25.5219	0.2435	0	0.0001	FDR <= 0.01
7295	P61978-3	P61978-3;Q5T6W2	Isoform 3 of Heterogeneous nuclear ribonucleoprotein K OS=Homo sapiens OX=9606 GN=HNRNPK	20	1	366	metabolic process;regulation of biological process;response to stimulus	cytoplasm;membrane;nucleus;spliceosomal complex	DNA binding;protein binding;RNA binding	HNRNPK	mRNA Processing			26.757	26.6889	0.0682	0.2316	0.326	FDR > 0.05	26.4863	26.6889	-0.2025	0.0049	0.0107	FDR <= 0.05
6725	Q96KP4	Q96KP4;Q96KP4-2;J3QKT2;J3KSV5;A0A087WYZ1;A0A087WVS2;J3QRH4	Cytosolic non-specific dipeptidase OS=Homo sapiens OX=9606 GN=CNDP2 PE=1 SV=2	21	14	231	metabolic process	cytoplasm;cytosol	catalytic activity;metal ion binding	CNDP2		Metabolic pathways; Histidine metabolism; Arginine and proline metabolism; beta-Alanine metabolism	Glutathione synthesis and recycling	24.5378	24.4522	0.0856	0.0083	0.0212	FDR <= 0.05	25.5301	24.4522	1.0779	0	0	FDR <= 0.01											-0.7797	-0.592	-0.6835	-0.5505	-0.7779	-0.6038	1.303	1.367	1.3173	1
3182	Q96DV4	Q96DV4;Q96DV4-2	39S ribosomal protein L38, mitochondrial OS=Homo sapiens OX=9606 GN=MRPL38 PE=1 SV=2	12	12	72	cell organization and biogenesis;metabolic process	membrane;mitochondrion;ribosome		MRPL38			Mitochondrial translation initiation; Mitochondrial translation elongation; Mitochondrial translation termination	21.7619	22.2139	-0.452	0	0	FDR <= 0.01	21.9177	22.2139	-0.2962	0	0.0002	FDR <= 0.01
5908	Q96Q15	Q96Q15;Q96Q15-2;J3KRA9;Q96Q15-3;Q96Q15-4;H3BQN7;I3L0W2;I3L400	Serine/threonine-protein kinase SMG1 OS=Homo sapiens OX=9606 GN=SMG1 PE=1 SV=3	28	28	132	metabolic process;regulation of biological process;response to stimulus;transport	cytoplasm;cytosol;nucleus	catalytic activity;DNA binding;metal ion binding;nucleotide binding;protein binding;RNA binding	SMG1		mRNA surveillance pathway	Nonsense Mediated Decay (NMD) enhanced by the Exon Junction Complex (EJC)	22.099	22.061	0.038	0.4882	0.5894	FDR > 0.05	22.3096	22.061	0.2487	0.0014	0.0037	FDR <= 0.01
232	Q7Z2W9	Q7Z2W9;F5H7V8	39S ribosomal protein L21, mitochondrial OS=Homo sapiens OX=9606 GN=MRPL21 PE=1 SV=2	3	3	18	cell organization and biogenesis;metabolic process	membrane;mitochondrion;ribosome	RNA binding;structural molecule activity	MRPL21		Ribosome	Mitochondrial translation initiation; Mitochondrial translation elongation; Mitochondrial translation termination	21.0894	21.5412	-0.4519	0.0001	0.0004	FDR <= 0.01	21.278	21.5412	-0.2632	0.0021	0.0052	FDR <= 0.01
5548	Q969G5	Q969G5;E9PIE3	Caveolae-associated protein 3 OS=Homo sapiens OX=9606 GN=CAVIN3 PE=1 SV=3	7	7	147	cell organization and biogenesis;regulation of biological process	cytoplasm;cytosol;membrane	protein binding	PRKCDBP; CAVIN3				25.1978	25.6495	-0.4517	0	0	FDR <= 0.01	24.9629	25.6495	-0.6867	0	0	FDR <= 0.01
2175	O95394	O95394;O95394-4;A0A494C0G1;H0Y987;O95394-3;A0A494C1Q4;A0A494C1E2;A0A087WT27;J3KN95;A0A494C099;A0A494C163;D6RIS6;H0Y8I3;D6RCQ8;D6RF77;D6RC77;A0A494C076;D6RCD1	Phosphoacetylglucosamine mutase OS=Homo sapiens OX=9606 GN=PGM3 PE=1 SV=1	23	23	214	metabolic process	cytosol	catalytic activity;metal ion binding	PGM3	Glucuronidation	Metabolic pathways; Amino sugar and nucleotide sugar metabolism	Synthesis of UDP-N-acetyl-glucosamine	24.6837	24.821	-0.1373	0.022	0.0477	FDR <= 0.05	24.677	24.821	-0.144	0.0178	0.0323	FDR <= 0.05
5179	O43155	O43155	Leucine-rich repeat transmembrane protein FLRT2 OS=Homo sapiens OX=9606 GN=FLRT2 PE=1 SV=1	11	11	89	cell organization and biogenesis;cellular component movement;development;regulation of biological process;response to stimulus	cytoplasm;endoplasmic reticulum;extracellular;membrane	enzyme regulator activity;protein binding;signal transducer activity	FLRT2			Downstream signaling of activated FGFR1	20.9909	21.441	-0.4501	0	0	FDR <= 0.01	20.7515	21.441	-0.6895	0	0	FDR <= 0.01
271	O95248-5	O95248-5;O95248;O95248-4;H0Y5W8	Isoform 5 of Myotubularin-related protein 5 OS=Homo sapiens OX=9606 GN=SBF1	31	29	186								22.525	22.4681	0.0569	0.0592	0.1079	FDR > 0.05	22.5488	22.4681	0.0807	0.0143	0.0269	FDR <= 0.05
6943	Q14240	Q14240;Q14240-2;E7EQG2;J3KSN7	Eukaryotic initiation factor 4A-II OS=Homo sapiens OX=9606 GN=EIF4A2 PE=1 SV=2	22	10	321	metabolic process;regulation of biological process	cytosol	catalytic activity;DNA binding;nucleotide binding;protein binding;RNA binding	EIF4A2	Translation Factors	RNA transport	ISG15 antiviral mechanism; L13a-mediated translational silencing of Ceruloplasmin expression; Translation initiation complex formation; GTP hydrolysis and joining of the 60S ribosomal subunit; Deadenylation of mRNA; Ribosomal scanning and start codon recognition	26.5977	26.6344	-0.0367	0.4764	0.5778	FDR > 0.05	26.5698	26.6344	-0.0646	0.2246	0.2896	FDR > 0.05
5289	Q9BXJ0	Q9BXJ0	Complement C1q tumor necrosis factor-related protein 5 OS=Homo sapiens OX=9606 GN=C1QTNF5 PE=1 SV=1	2	2	5	cell organization and biogenesis;transport	extracellular;membrane	protein binding	C1QTNF5				17.1835	17.6334	-0.4499	0.0008	0.0031	FDR <= 0.01	18.9357	17.6334	1.3023	0	0	FDR <= 0.01											-0.2713	-0.7397	-0.4041	-1.2017	-0.3972	-0.8293	1.2604	1.2586	1.3243	1	Matrisome-associated	ECM-affiliated Proteins
3813	Q93009	Q93009;Q93009-3;H3BND8;A0A669KBL1;F5H2X1;H3BTM1;H3BRA2;H3BUV0;H3BQD1	Ubiquitin carboxyl-terminal hydrolase 7 OS=Homo sapiens OX=9606 GN=USP7 PE=1 SV=2	31	31	182	cell organization and biogenesis;development;metabolic process;regulation of biological process;response to stimulus	chromosome;cytoplasm;cytosol;nucleus	catalytic activity;protein binding	USP7	Regulation of toll-like receptor signaling pathway	Epstein-Barr virus infection; Viral carcinogenesis; Herpes simplex infection; FoxO signaling pathway	Synthesis of active ubiquitin: roles of E1 and E2 enzymes; Ub-specific processing proteases; Gap-filling DNA repair synthesis and ligation in TC-NER; Regulation of TP53 Degradation; Dual incision in TC-NER; Formation of TC-NER Pre-Incision Complex; Regulation of PTEN localization	23.2779	23.2034	0.0745	0.0374	0.0736	FDR > 0.05	23.2742	23.2034	0.0708	0.0453	0.073	FDR > 0.05
8069	Q9Y6Y8	Q9Y6Y8;Q9Y6Y8-2;A0A0C4DH82;H7C4C4;H7C0V8	SEC23-interacting protein OS=Homo sapiens OX=9606 GN=SEC23IP PE=1 SV=1	30	29	209	cell organization and biogenesis;transport	cytoplasm;cytosol;endoplasmic reticulum;Golgi;membrane	catalytic activity;metal ion binding;protein binding;RNA binding	SEC23IP			COPII (Coat Protein 2) Mediated Vesicle Transport	24.6851	24.7867	-0.1016	0.0079	0.0202	FDR <= 0.05	24.7697	24.7867	-0.017	0.5726	0.6353	FDR > 0.05
67	A0A1W2PNX8	Q9H3U1-2;A0A1W2PNX8;Q9H3U1;Q9H3U1-3	Protein unc-45 homolog A OS=Homo sapiens OX=9606 GN=UNC45A PE=1 SV=1	31	30	181			protein binding					24.2009	23.9525	0.2484	0.0456	0.0867	FDR > 0.05	24.3761	23.9525	0.4235	0.0038	0.0085	FDR <= 0.01
7271	Q6P1L8	Q6P1L8	39S ribosomal protein L14, mitochondrial OS=Homo sapiens OX=9606 GN=MRPL14 PE=1 SV=1	4	4	28	cell organization and biogenesis;metabolic process	membrane;mitochondrion;ribosome	RNA binding;structural molecule activity	MRPL14		Ribosome	Mitochondrial translation initiation; Mitochondrial translation elongation; Mitochondrial translation termination	19.8981	20.3478	-0.4497	0	0.0001	FDR <= 0.01	20.1023	20.3478	-0.2455	0.0004	0.0012	FDR <= 0.01
2323	H0Y4R1	P12268;H0Y4R1;E7ETK5	Inosine-5'-monophosphate dehydrogenase 2 (Fragment) OS=Homo sapiens OX=9606 GN=IMPDH2 PE=1 SV=1	22	20	204	metabolic process	cytosol	catalytic activity					26.1179	26.013	0.1049	0.0057	0.0154	FDR <= 0.05	25.7082	26.013	-0.3048	0	0	FDR <= 0.01
6856	Q15149-8	Q15149-8	Isoform 8 of Plectin OS=Homo sapiens OX=9606 GN=PLEC	343	1	5293	cell organization and biogenesis	cytoplasm;cytoskeleton;cytosol;membrane	protein binding;RNA binding;structural molecule activity	PLEC				22.0698	22.5173	-0.4476	0.0001	0.0005	FDR <= 0.01	22.3199	22.5173	-0.1974	0.0118	0.0227	FDR <= 0.05
7088	Q9H583	Q9H583;Q5T3Q7;Q6P664	HEAT repeat-containing protein 1 OS=Homo sapiens OX=9606 GN=HEATR1 PE=1 SV=3	34	34	182	metabolic process;regulation of biological process	membrane;mitochondrion;nucleus	protein binding;RNA binding	HEATR1		Ribosome biogenesis in eukaryotes	Major pathway of rRNA processing in the nucleolus and cytosol; rRNA modification in the nucleus and cytosol	22.6054	22.5626	0.0428	0.2371	0.3319	FDR > 0.05	22.6425	22.5626	0.0799	0.044	0.071	FDR > 0.05
3243	Q9UBC2-2	Q9UBC2-2;Q9UBC2;Q9UBC2-3;M0R165;Q9UBC2-4;M0R2S2;M0R1V5;M0QX30;M0R3I1;K7EJR2;M0R330	Isoform 2 of Epidermal growth factor receptor substrate 15-like 1 OS=Homo sapiens OX=9606 GN=EPS15L1	24	24	160	cell differentiation;cell organization and biogenesis;cellular component movement;metabolic process;regulation of biological process;response to stimulus;transport	cytoplasm;cytoskeleton;cytosol;Golgi;membrane;nucleus	catalytic activity;metal ion binding;motor activity;nucleotide binding;protein binding;structural molecule activity;transporter activity	EPS15L1	EGF/EGFR Signaling Pathway			23.5026	23.4903	0.0122	0.6654	0.7424	FDR > 0.05	23.729	23.4903	0.2387	0	0.0001	FDR <= 0.01
1102	Q8IWR0	Q8IWR0;I3L2K5;Q8IWR0-2;I3L2N8;I3L323;I3L382	Zinc finger CCCH domain-containing protein 7A OS=Homo sapiens OX=9606 GN=ZC3H7A PE=1 SV=1	26	25	157	metabolic process;regulation of biological process;response to stimulus	nucleus	metal ion binding;protein binding;RNA binding	ZC3H7A				23.2941	23.3453	-0.0512	0.2607	0.3571	FDR > 0.05	23.4629	23.3453	0.1177	0.0238	0.0416	FDR <= 0.05
5596	Q9P015	Q9P015;E5RIZ4;E5RHF4	39S ribosomal protein L15, mitochondrial OS=Homo sapiens OX=9606 GN=MRPL15 PE=1 SV=1	8	7	55	cell organization and biogenesis;metabolic process	membrane;mitochondrion;ribosome	protein binding;RNA binding;structural molecule activity	MRPL15		Ribosome	Mitochondrial translation initiation; Mitochondrial translation elongation; Mitochondrial translation termination	21.8325	22.2798	-0.4473	0	0.0001	FDR <= 0.01	21.9324	22.2798	-0.3474	0.0001	0.0002	FDR <= 0.01
1021	Q96DI7	Q96DI7;Q96DI7-2;Q9NSS8	U5 small nuclear ribonucleoprotein 40 kDa protein OS=Homo sapiens OX=9606 GN=SNRNP40 PE=1 SV=1	16	16	124	cell organization and biogenesis;metabolic process	cytosol;nucleus;spliceosomal complex	protein binding;RNA binding	SNRNP40	mRNA Processing	Spliceosome	mRNA Splicing - Major Pathway; mRNA Splicing - Minor Pathway	22.7046	22.6292	0.0754	0.0313	0.0635	FDR > 0.05	22.5109	22.6292	-0.1183	0.0035	0.008	FDR <= 0.01
8051	P62258	P62258;P62258-2;K7EM20;I3L3T1;B4DJF2;K7EIT4	14-3-3 protein epsilon OS=Homo sapiens OX=9606 GN=YWHAE PE=1 SV=1	17	14	676	cell organization and biogenesis;cellular component movement;cellular homeostasis;metabolic process;regulation of biological process;response to stimulus;transport	cytoplasm;cytosol;membrane;mitochondrion;nucleus	protein binding;RNA binding	YWHAE	Cell Cycle; Myometrial Relaxation and Contraction Pathways; VEGFA-VEGFR2 Signaling Pathway; Calcium Regulation in the Cardiac Cell; Sudden Infant Death Syndrome (SIDS) Susceptibility Pathways	Oocyte meiosis; Epstein-Barr virus infection; Cell cycle; Neurotrophin signaling pathway; PI3K-Akt signaling pathway; Hippo signaling pathway; Viral carcinogenesis	Regulation of PLK1 Activity at G2/M Transition; Recruitment of NuMA to mitotic centrosomes; Loss of Nlp from mitotic centrosomes; NADE modulates death signalling; Translocation of GLUT4 to the plasma membrane; Deregulated CDK5 triggers multiple neurodegenerative pathways in Alzheimer's disease models; Chk1/Chk2(Cds1) mediated inactivation of Cyclin B:Cdk1 complex; Signaling by Hippo; AURKA Activa…	26.8746	26.844	0.0306	0.441	0.5435	FDR > 0.05	26.9218	26.844	0.0778	0.0733	0.1101	FDR > 0.05
6169	Q16585	Q16585;Q16585-2;H0YA15;H0Y8J3	Beta-sarcoglycan OS=Homo sapiens OX=9606 GN=SGCB PE=1 SV=1	11	11	81	cell organization and biogenesis	cytoplasm;cytoskeleton;membrane		SGCB	Arrhythmogenic Right Ventricular Cardiomyopathy	Viral myocarditis; Hypertrophic cardiomyopathy (HCM); Arrhythmogenic right ventricular cardiomyopathy (ARVC); Dilated cardiomyopathy		22.4946	22.9413	-0.4468	0	0	FDR <= 0.01	22.2753	22.9413	-0.6661	0	0	FDR <= 0.01
2539	P34897	P34897;P34897-3;P34897-2;G3V4W5;G3V5L0;G3V2Y4;G3V540;H0YIZ0;G3V2W0;G3V4T0;G3V3Y8;G3V4X0;G3V241;G3V2E4	Serine hydroxymethyltransferase, mitochondrial OS=Homo sapiens OX=9606 GN=SHMT2 PE=1 SV=3	24	22	189	cell organization and biogenesis;metabolic process;regulation of biological process;response to stimulus	cytoplasm;cytoskeleton;membrane;mitochondrion;nucleus;organelle lumen	catalytic activity;protein binding	SHMT2	Vitamin B12 Metabolism; Folate Metabolism; One Carbon Metabolism; Trans-sulfuration and one carbon metabolism; One carbon metabolism and related pathways	One carbon pool by folate; Glycine, serine and threonine metabolism; Glyoxylate and dicarboxylate metabolism; Biosynthesis of amino acids; Carbon metabolism; Metabolic pathways; Antifolate resistance	Metabolism of folate and pterines	24.494	24.6332	-0.1393	0.0037	0.0108	FDR <= 0.05	24.4348	24.6332	-0.1984	0.0004	0.0013	FDR <= 0.01
4664	Q14966	Q14966-3;Q14966;Q14966-4;Q14966-2;Q14966-6;Q14966-5;A0A096LPK8;C9JWN0;A0A096LPI0;A0A096LNS4	Zinc finger protein 638 OS=Homo sapiens OX=9606 GN=ZNF638 PE=1 SV=2	33	33	159	metabolic process;regulation of biological process	cytoplasm;nucleus	DNA binding;metal ion binding;RNA binding	ZNF638			Transcriptional regulation of white adipocyte differentiation	23.3595	23.2616	0.0979	0.0138	0.0323	FDR <= 0.05	23.146	23.2616	-0.1156	0.006	0.0127	FDR <= 0.05
7593	Q9Y3B7	Q9Y3B7-2;Q9Y3B7;Q9Y3B7-3;E9PQB6	39S ribosomal protein L11, mitochondrial OS=Homo sapiens OX=9606 GN=MRPL11 PE=1 SV=1	6	6	26	cell organization and biogenesis;metabolic process	membrane;mitochondrion;ribosome	protein binding;RNA binding;structural molecule activity	MRPL11		Ribosome	Mitochondrial translation initiation; Mitochondrial translation elongation; Mitochondrial translation termination	21.3872	21.8338	-0.4466	0.0001	0.0008	FDR <= 0.01	21.4262	21.8338	-0.4076	0.0003	0.0009	FDR <= 0.01
4118	Q9NV70-2	Q9NV70-2;Q9NV70	Isoform 2 of Exocyst complex component 1 OS=Homo sapiens OX=9606 GN=EXOC1	28	28	156	defense response;regulation of biological process;response to stimulus;transport	cytoplasm;cytosol;membrane	protein binding	EXOC1				23.9321	23.8811	0.051	0.0484	0.091	FDR > 0.05	24.0423	23.8811	0.1613	0.0001	0.0003	FDR <= 0.01
2236	Q08J23	Q08J23;Q08J23-2;Q08J23-3;A0A140T9Y7	tRNA (cytosine(34)-C(5))-methyltransferase OS=Homo sapiens OX=9606 GN=NSUN2 PE=1 SV=2	28	28	163	cell division;metabolic process	cytoplasm;cytoskeleton;nucleus	catalytic activity;RNA binding	NSUN2			tRNA modification in the nucleus and cytosol	23.6696	23.7257	-0.0561	0.1119	0.181	FDR > 0.05	23.6509	23.7257	-0.0747	0.0445	0.0718	FDR > 0.05
8180	Q15555	Q15555-3;Q15555-5;Q15555;Q15555-4;Q15555-2;K7ERD8;K7EL66;M0QX52;K7ENB3	Microtubule-associated protein RP/EB family member 2 OS=Homo sapiens OX=9606 GN=MAPRE2 PE=1 SV=1	12	9	60	cell division;cell proliferation;regulation of biological process;response to stimulus	cytoplasm;cytoskeleton	protein binding	MAPRE2				22.0421	22.4873	-0.4452	0	0	FDR <= 0.01	22.446	22.4873	-0.0412	0.3127	0.3826	FDR > 0.05
7847	Q96K76-2	Q96K76-2	Isoform 2 of Ubiquitin carboxyl-terminal hydrolase 47 OS=Homo sapiens OX=9606 GN=USP47	32	1	166	metabolic process;regulation of biological process;response to stimulus	cytoplasm	catalytic activity;protein binding	USP47				18.3882	18.2081	0.1801	0.5392	0.6362	FDR > 0.05	17.9783	18.2081	-0.2298	0.4369	0.5058	FDR > 0.05
6168	O60568	O60568;H7C2V1;H7C2S8;H7C0B8;C9JU11;H7C2A8	Multifunctional procollagen lysine hydroxylase and glycosyltransferase LH3 OS=Homo sapiens OX=9606 GN=PLOD3 PE=1 SV=1	25	25	199	cell organization and biogenesis;metabolic process;response to stimulus	endoplasmic reticulum;Golgi;membrane	catalytic activity;metal ion binding;protein binding	PLOD3		Lysine degradation; Other types of O-glycan biosynthesis	Collagen biosynthesis and modifying enzymes	24.4886	24.5535	-0.0649	0.0805	0.1386	FDR > 0.05	24.3521	24.5535	-0.2014	0.0003	0.0009	FDR <= 0.01																					Matrisome-associated	ECM Regulators
6697	P48047	P48047;H7C0C1;A0A494C0K9;H7C068	ATP synthase subunit O, mitochondrial OS=Homo sapiens OX=9606 GN=ATP5PO PE=1 SV=1	9	9	139	cell organization and biogenesis;metabolic process;transport	membrane;mitochondrion;nucleus	catalytic activity;protein binding;transporter activity	ATP5O	Electron Transport Chain; Oxidative phosphorylation	Alzheimer's disease; Metabolic pathways; Huntington's disease; Oxidative phosphorylation; Parkinson's disease	Cristae formation; Formation of ATP by chemiosmotic coupling	24.068	24.5121	-0.444	0	0	FDR <= 0.01	24.159	24.5121	-0.3531	0	0	FDR <= 0.01
6746	Q06124	Q06124	Tyrosine-protein phosphatase non-receptor type 11 OS=Homo sapiens OX=9606 GN=PTPN11 PE=1 SV=2	28	1	198	cell differentiation;cell organization and biogenesis;cellular component movement;metabolic process;regulation of biological process;response to stimulus	cytoplasm;cytosol;mitochondrion;nucleus	catalytic activity;protein binding	PTPN11	IL-5 Signaling Pathway; Heart Development; IL-1 signaling pathway; Leptin signaling pathway; Prolactin Signaling Pathway; B Cell Receptor Signaling Pathway; Interleukin-11 Signaling Pathway; Oncostatin M Signaling Pathway; Brain-Derived Neurotrophic Factor (BDNF) signaling pathway; Alpha 6 Beta 4 signaling pathway; IL-3 Signaling Pathway; Kit receptor signaling pathway; Signaling of Hepatocyte Gr…	Neurotrophin signaling pathway; Leukocyte transendothelial migration; Insulin resistance; Natural killer cell mediated cytotoxicity; Herpes simplex infection; Adipocytokine signaling pathway; Renal cell carcinoma; Ras signaling pathway; Phospholipase D signaling pathway; Jak-STAT signaling pathway; Epithelial cell signaling in Helicobacter pylori infection; Chronic myeloid leukemia; Proteoglycans…	PI3K Cascade; PD-1 signaling; Tie2 Signaling; PECAM1 interactions; PI-3K cascade:FGFR3; FRS-mediated FGFR4 signaling; Signaling by Leptin; Signal regulatory protein family interactions; CTLA4 inhibitory signaling; Downstream signal transduction; Activated TLR4 signalling; Platelet sensitization by LDL; MET activates PTPN11; PI-3K cascade:FGFR4; Constitutive Signaling by Aberrant PI3K in Cancer; I…	17.3284	17.4825	-0.154	0.2984	0.3977	FDR > 0.05	17.5687	17.4825	0.0862	0.5509	0.6152	FDR > 0.05
6164	P48735	P48735-2;P48735;H0YL11	Isocitrate dehydrogenase [NADP], mitochondrial OS=Homo sapiens OX=9606 GN=IDH2 PE=1 SV=2	18	18	120	cell organization and biogenesis;metabolic process;regulation of biological process	cytosol;membrane;mitochondrion;organelle lumen	catalytic activity;metal ion binding;nucleotide binding	IDH2	TCA Cycle	2-Oxocarboxylic acid metabolism; Peroxisome; Glutathione metabolism; Citrate cycle (TCA cycle); Metabolic pathways; Biosynthesis of amino acids; Carbon metabolism	Transcriptional activation of mitochondrial biogenesis; Citric acid cycle (TCA cycle)	24.3454	24.7889	-0.4435	0	0	FDR <= 0.01	24.3698	24.7889	-0.4191	0	0	FDR <= 0.01
2527	P52306-3	P52306-2;P52306-3;D6RHZ7	Isoform 3 of Rap1 GTPase-GDP dissociation stimulator 1 OS=Homo sapiens OX=9606 GN=RAP1GDS1	22	1	177	cell organization and biogenesis;cellular homeostasis;regulation of biological process;response to stimulus	cytosol;endoplasmic reticulum;mitochondrion	enzyme regulator activity;protein binding	RAP1GDS1				14.2124	13.5	0.7124	0.0074	0.0193	FDR <= 0.05	13.6718	13.5	0.1718	0.4159	0.4859	FDR > 0.05
7048	P07954	P07954-2;P07954	Fumarate hydratase, mitochondrial OS=Homo sapiens OX=9606 GN=FH PE=1 SV=3	19	19	228	metabolic process	cytoplasm;mitochondrion;organelle lumen	catalytic activity;protein binding	FH	TCA Cycle and Deficiency of Pyruvate Dehydrogenase complex (PDHc); Amino Acid metabolism; TCA Cycle	Renal cell carcinoma; Carbon metabolism; Pathways in cancer; Citrate cycle (TCA cycle); Metabolic pathways; Pyruvate metabolism	Citric acid cycle (TCA cycle)	25.0255	25.4628	-0.4373	0	0	FDR <= 0.01	25.24	25.4628	-0.2228	0.0001	0.0002	FDR <= 0.01
886	Q96BW5	Q96BW5-2;Q96BW5;A0A0A0MSI3	Phosphotriesterase-related protein OS=Homo sapiens OX=9606 GN=PTER PE=1 SV=1	10	10	54	cell differentiation;metabolic process		catalytic activity;metal ion binding	PTER				21.832	22.2751	-0.4431	0	0	FDR <= 0.01	21.5013	22.2751	-0.7738	0	0	FDR <= 0.01
2453	Q96AE4-2	Q96AE4-2;C9JSZ1	Isoform 2 of Far upstream element-binding protein 1 OS=Homo sapiens OX=9606 GN=FUBP1	24	1	281	metabolic process;regulation of biological process	nucleus	DNA binding;protein binding;RNA binding	FUBP1				16.4473	16.3933	0.054	0.8569	0.8954	FDR > 0.05	16.0876	16.3933	-0.3057	0.3224	0.3926	FDR > 0.05
2424	A0A0G2JPP5	Q14160-3;Q14160;A0A0G2JNZ2;A0A0G2JPP5;A0A0G2JMS7;Q14160-2;A0A669KB89;H0YCG0;H0YDF9;A0A669KAX5	Protein scribble homolog OS=Homo sapiens OX=9606 GN=SCRIB PE=1 SV=1	34	33	165	cell communication;cell death;cell organization and biogenesis;cell proliferation;cellular component movement;metabolic process;regulation of biological process;response to stimulus;transport	membrane	catalytic activity;protein binding	SCRIB	Human Thyroid Stimulating Hormone (TSH) signaling pathway			22.9613	22.9071	0.0542	0.0702	0.1239	FDR > 0.05	22.8781	22.9071	-0.029	0.2969	0.3672	FDR > 0.05
7929	P62191	P62191;P62191-2;G3V4X1	26S proteasome regulatory subunit 4 OS=Homo sapiens OX=9606 GN=PSMC1 PE=1 SV=1	25	24	190	metabolic process;regulation of biological process;response to stimulus;transport	cytoplasm;cytosol;membrane;nucleus;proteasome	catalytic activity;nucleotide binding;protein binding;RNA binding	PSMC1	Proteasome Degradation; Parkin-Ubiquitin Proteasomal System pathway	Viral carcinogenesis; Proteasome; Epstein-Barr virus infection	Regulation of RAS by GAPs; CDT1 association with the CDC6:ORC:origin complex; Downstream TCR signaling; UCH proteinases; NIK-->noncanonical NF-kB signaling; Hh mutants that don't undergo autocatalytic processing are degraded by ERAD; SCF-beta-TrCP mediated degradation of Emi1; Cross-presentation of soluble exogenous antigens (endosomes); Separation of Sister Chromatids; Vpu mediated degradation o…	25.316	25.3512	-0.0353	0.3167	0.4171	FDR > 0.05	25.3794	25.3512	0.0282	0.4183	0.4881	FDR > 0.05
7983	P29966	P29966	Myristoylated alanine-rich C-kinase substrate OS=Homo sapiens OX=9606 GN=MARCKS PE=1 SV=4	12	11	106	cell organization and biogenesis;regulation of biological process	cytoplasm;cytoskeleton;membrane;nucleus	protein binding	MARCKS	Brain-Derived Neurotrophic Factor (BDNF) signaling pathway	MicroRNAs in cancer; Fc gamma R-mediated phagocytosis	Acetylcholine regulates insulin secretion	24.9546	25.3959	-0.4414	0.0001	0.0007	FDR <= 0.01	25.444	25.3959	0.0481	0.4736	0.5415	FDR > 0.05
6143	O43242	O43242;O43242-2;F5H8K4;H0YGV8	26S proteasome non-ATPase regulatory subunit 3 OS=Homo sapiens OX=9606 GN=PSMD3 PE=1 SV=2	26	26	232	metabolic process;regulation of biological process;response to stimulus;transport	cytosol;extracellular;membrane;nucleus;organelle lumen;proteasome	catalytic activity;enzyme regulator activity;protein binding	PSMD3	Proteasome Degradation; Parkin-Ubiquitin Proteasomal System pathway	Epstein-Barr virus infection; Proteasome	Regulation of RAS by GAPs; CDT1 association with the CDC6:ORC:origin complex; Downstream TCR signaling; UCH proteinases; NIK-->noncanonical NF-kB signaling; Hh mutants that don't undergo autocatalytic processing are degraded by ERAD; SCF-beta-TrCP mediated degradation of Emi1; Neutrophil degranulation; Cross-presentation of soluble exogenous antigens (endosomes); Separation of Sister Chromatids; …	25.2279	25.2633	-0.0354	0.2252	0.3189	FDR > 0.05	25.273	25.2633	0.0097	0.7283	0.7777	FDR > 0.05
802	Q9Y680	Q9Y680	Peptidyl-prolyl cis-trans isomerase FKBP7 OS=Homo sapiens OX=9606 GN=FKBP7 PE=1 SV=2	15	1	129								17.9251	18.3665	-0.4413	0.0012	0.0044	FDR <= 0.01	18.054	18.3665	-0.3125	0.0088	0.0176	FDR <= 0.05
7692	Q32Q12	Q32Q12;P22392-2;J3KPD9;P22392;F6XY72	Nucleoside diphosphate kinase OS=Homo sapiens OX=9606 GN=NME1-NME2 PE=1 SV=1	15	2	426	metabolic process	cytosol	catalytic activity;nucleotide binding	NME1-NME2				27.4311	27.5982	-0.1671	0.064	0.1147	FDR > 0.05	27.5022	27.5982	-0.096	0.2523	0.3197	FDR > 0.05
1189	Q96T51	Q96T51;Q96T51-2;Q96T51-3;H0YAC8;J3KPP6;H0Y9Y8	RUN and FYVE domain-containing protein 1 OS=Homo sapiens OX=9606 GN=RUFY1 PE=1 SV=2	28	26	155	metabolic process;regulation of biological process;transport	cytoplasm;cytosol;endosome;membrane	metal ion binding;protein binding;transporter activity	RUFY1		Endocytosis	Synthesis of PIPs at the plasma membrane	24.1642	24.1213	0.0429	0.0991	0.1639	FDR > 0.05	24.3668	24.1213	0.2455	0	0	FDR <= 0.01
1329	A0A0U1RRK1	A0A0U1RRK1;F6XEV2;Q9BPX6;Q9BPX6-3;A0A286YF11;Q9BPX6-2;Q9BPX6-4;Q9BPX6-5;E9PQV6;S4R3D7;S4R3V1;S4R3W3	Calcium uptake protein 1, mitochondrial OS=Homo sapiens OX=9606 GN=MICU1 PE=1 SV=1	16	16	82	cell organization and biogenesis;cellular homeostasis;defense response;response to stimulus;transport	membrane;mitochondrion	metal ion binding;protein binding	MICU1				23.329	23.7702	-0.4412	0	0.0001	FDR <= 0.01	23.0642	23.7702	-0.7061	0	0	FDR <= 0.01
3880	O43150	O43150	Arf-GAP with SH3 domain, ANK repeat and PH domain-containing protein 2 OS=Homo sapiens OX=9606 GN=ASAP2 PE=1 SV=3	25	3	157	regulation of biological process	cytoplasm;Golgi;membrane	enzyme regulator activity;metal ion binding;protein binding	ASAP2		Fc gamma R-mediated phagocytosis; Endocytosis		23.0945	23.1417	-0.0472	0.2672	0.3646	FDR > 0.05	23.0015	23.1417	-0.1403	0.0076	0.0155	FDR <= 0.05
4064	B3KS98	B3KS98;O15372;A0A087WZK9;E5RGU4;E5RJT0;E5RFH0;E5RFW7;E5RHC7;E5RH59	Eukaryotic translation initiation factor 3 subunit H OS=Homo sapiens OX=9606 GN=EIF3H PE=1 SV=1	17	17	238	cell organization and biogenesis;metabolic process;regulation of biological process	cytoplasm;cytosol;membrane	protein binding;RNA binding	EIF3H	Translation Factors			24.8227	24.7833	0.0395	0.224	0.3177	FDR > 0.05	24.8978	24.7833	0.1145	0.0051	0.011	FDR <= 0.05
1580	Q9BXJ8	A0A087WZA9;Q9BXJ8;A0A024R4K9;Q9BXJ8-2;A0A087X266	Transmembrane protein 120A OS=Homo sapiens OX=9606 GN=TMEM120A PE=1 SV=1	3	3	9	cell differentiation;cell organization and biogenesis	membrane;nucleus		TMEM120A				19.1981	19.6386	-0.4405	0.0005	0.0019	FDR <= 0.01	18.8749	19.6386	-0.7637	0	0.0001	FDR <= 0.01
2162	P54819	P54819;F8W1A4;P54819-2;P54819-5;P54819-3;F8VZG5;P54819-6;G3V213;A0A5F9ZHP2;F8VY04;P54819-4;A0A5K1VW67;F8VPP1	Adenylate kinase 2, mitochondrial OS=Homo sapiens OX=9606 GN=AK2 PE=1 SV=2	15	15	176	metabolic process	membrane;mitochondrion	catalytic activity;nucleotide binding	AK2		Metabolic pathways; Thiamine metabolism; Purine metabolism	Interconversion of nucleotide di- and triphosphates	24.031	24.4713	-0.4403	0	0	FDR <= 0.01	24.0826	24.4713	-0.3888	0	0	FDR <= 0.01
1795	Q4TT34	Q4TT34;O00746-2;F2Z2X0;A0A087WVT9;O00746	Nucleoside diphosphate kinase OS=Homo sapiens OX=9606 GN=NME4 PE=1 SV=1	2	2	12	metabolic process;regulation of biological process;transport	membrane;mitochondrion;organelle lumen	catalytic activity;metal ion binding;nucleotide binding;protein binding	NME4				18.1725	18.6124	-0.4399	0.001	0.0037	FDR <= 0.01	18.1273	18.6124	-0.4851	0.0005	0.0016	FDR <= 0.01
190	Q6XZF7	Q6XZF7;A0A1B0GTX1;A0A1C7CYY6;Q6XZF7-2	Dynamin-binding protein OS=Homo sapiens OX=9606 GN=DNMBP PE=1 SV=1	27	27	115	regulation of biological process;response to stimulus	cytoplasm;cytoskeleton;Golgi	protein binding	DNMBP				21.8949	21.7842	0.1107	0.0045	0.0126	FDR <= 0.05	21.9456	21.7842	0.1614	0.0005	0.0014	FDR <= 0.01
5469	O00499	O00499-3;O00499-7;O00499-2;O00499-9;O00499;O00499-5;O00499-4;O00499-6;O00499-11;O00499-8;O00499-10	Myc box-dependent-interacting protein 1 OS=Homo sapiens OX=9606 GN=BIN1 PE=1 SV=1	19	18	123	cell differentiation;cell organization and biogenesis;cell proliferation;development;regulation of biological process;transport	cytoplasm;cytoskeleton;cytosol;membrane;nucleus	protein binding	BIN1	VEGFA-VEGFR2 Signaling Pathway	Endocytosis; Fc gamma R-mediated phagocytosis	Clathrin-mediated endocytosis	22.9686	23.4084	-0.4397	0	0	FDR <= 0.01	23.3307	23.4084	-0.0777	0.0262	0.0453	FDR <= 0.05
3103	Q9UKU7	Q9UKU7;Q9UKU7-3;Q9UKU7-2	Isobutyryl-CoA dehydrogenase, mitochondrial OS=Homo sapiens OX=9606 GN=ACAD8 PE=1 SV=1	11	11	46	metabolic process;regulation of biological process	mitochondrion;organelle lumen	catalytic activity;nucleotide binding	ACAD8		Metabolic pathways; Valine, leucine and isoleucine degradation	Branched-chain amino acid catabolism	21.3806	21.8193	-0.4387	0	0.0001	FDR <= 0.01	21.6724	21.8193	-0.147	0.0126	0.0241	FDR <= 0.05
7641	Q8TDQ7	Q8TDQ7;Q8TDQ7-3;Q8TDQ7-5;Q8TDQ7-2;Q8TDQ7-4	Glucosamine-6-phosphate isomerase 2 OS=Homo sapiens OX=9606 GN=GNPDA2 PE=1 SV=1	15	9	166	metabolic process	cytoplasm;cytosol;nucleus	catalytic activity;protein binding	GNPDA2		Amino sugar and nucleotide sugar metabolism; Metabolic pathways	Glycolysis	23.1246	23.2507	-0.1261	0.0075	0.0193	FDR <= 0.05	23.3765	23.2507	0.1258	0.0076	0.0155	FDR <= 0.05
2784	P42566	P42566;B1AUU8;P42566-2;S4R3U1	Epidermal growth factor receptor substrate 15 OS=Homo sapiens OX=9606 GN=EPS15 PE=1 SV=2	26	26	178	cell organization and biogenesis;cell proliferation;metabolic process;regulation of biological process;response to stimulus;transport	cytoplasm;cytoskeleton;cytosol;endosome;membrane;nucleus	catalytic activity;DNA binding;metal ion binding;motor activity;protein binding	EPS15	VEGFA-VEGFR2 Signaling Pathway; EGF/EGFR Signaling Pathway	Endocytosis	Cargo recognition for clathrin-mediated endocytosis; Negative regulation of MET activity; EGFR downregulation; InlB-mediated entry of Listeria monocytogenes into host cell	23.606	23.6087	-0.0026	0.9092	0.9335	FDR > 0.05	23.9604	23.6087	0.3518	0	0	FDR <= 0.01
8105	Q5JTV8-3	Q5JTV8-3;J3KN66;Q5JTV8-2	Isoform 3 of Torsin-1A-interacting protein 1 OS=Homo sapiens OX=9606 GN=TOR1AIP1	23	1	236	cell organization and biogenesis;regulation of biological process	membrane;nucleus	enzyme regulator activity;protein binding	TOR1AIP1									NA						NA
2957	P19174	P19174;P19174-2;V9GY71;V9GYH5;V9GY63;A0A0D9SEK2	1-phosphatidylinositol 4,5-bisphosphate phosphodiesterase gamma-1 OS=Homo sapiens OX=9606 GN=PLCG1 PE=1 SV=1	32	32	154	cellular component movement;metabolic process;regulation of biological process;response to stimulus	cytoplasm;cytosol;membrane	catalytic activity;metal ion binding;protein binding;signal transducer activity	PLCG1	Angiogenesis; IL-1 signaling pathway; RANKL/RANK (Receptor activator of NFKB (ligand)) Signaling Pathway; Leptin signaling pathway; Signaling Pathways in Glioblastoma; B Cell Receptor Signaling Pathway; Corticotropin-releasing hormone signaling pathway; Brain-Derived Neurotrophic Factor (BDNF) signaling pathway; PDGF Pathway; Primary Focal Segmental Glomerulosclerosis FSGS; T-Cell Receptor and Co…	Non-small cell lung cancer; Vibrio cholerae infection; Choline metabolism in cancer; Epstein-Barr virus infection; NF-kappa B signaling pathway; Th1 and Th2 cell differentiation; Pathways in cancer; Metabolic pathways; VEGF signaling pathway; Fc epsilon RI signaling pathway; EGFR tyrosine kinase inhibitor resistance; MicroRNAs in cancer; Glioma; Axon guidance; Natural killer cell mediated cytotox…	EGFR interacts with phospholipase C-gamma; FCERI mediated Ca+2 mobilization; Signaling by FGFR4 in disease; PECAM1 interactions; ISG15 antiviral mechanism; DAG and IP3 signaling; Signaling by FGFR2 in disease; FCERI mediated MAPK activation; Downstream signal transduction; Signaling by FGFR1 in disease; Signaling by FGFR3 point mutants in cancer; DAP12 signaling; Frs2-mediated activation; Synthes…	23.7572	23.624	0.1332	0.0252	0.0533	FDR > 0.05	23.4364	23.624	-0.1876	0.0048	0.0104	FDR <= 0.05
5607	Q5T0V7	Q5T0V7;Q03001-11	Dystonin (Fragment) OS=Homo sapiens OX=9606 GN=DST PE=1 SV=1	26	2	164	cell organization and biogenesis;cellular component movement;regulation of biological process;response to stimulus;transport	cytoplasm;cytoskeleton;cytosol;membrane;nucleus	catalytic activity;metal ion binding;protein binding	DST				17.9842	17.7751	0.2091	0.041	0.0794	FDR > 0.05	18.1278	17.7751	0.3527	0.0034	0.0079	FDR <= 0.01
4804	A0A0C4DG89	A0A0C4DG89;Q7L014;D6RJA6;H0Y9U3	Probable ATP-dependent RNA helicase DDX46 OS=Homo sapiens OX=9606 GN=DDX46 PE=1 SV=1	32	32	158	metabolic process;regulation of biological process	cytoplasm;membrane;nucleus	catalytic activity;nucleotide binding;RNA binding	DDX46				24.0375	24.1041	-0.0666	0.1456	0.2241	FDR > 0.05	23.9572	24.1041	-0.1469	0.0074	0.0153	FDR <= 0.05
833	Q8NE71	Q8NE71;Q8NE71-2;H0YGW7;A0A0G2JIC2	ATP-binding cassette sub-family F member 1 OS=Homo sapiens OX=9606 GN=ABCF1 PE=1 SV=2	26	15	195	defense response;metabolic process;regulation of biological process;response to stimulus;transport	cytoplasm;cytosol;membrane;nucleus;ribosome	catalytic activity;nucleotide binding;protein binding;RNA binding;translation regulator activity	ABCF1			ABC-family proteins mediated transport	24.1356	24.0363	0.0993	0.0461	0.0876	FDR > 0.05	24.025	24.0363	-0.0114	0.7941	0.8344	FDR > 0.05
6877	P82912	P82912;P82912-2;H0YL99	28S ribosomal protein S11, mitochondrial OS=Homo sapiens OX=9606 GN=MRPS11 PE=1 SV=2	5	5	29	cell organization and biogenesis;metabolic process;response to stimulus	membrane;mitochondrion;ribosome	RNA binding;structural molecule activity	MRPS11		Ribosome	Mitochondrial translation initiation; Mitochondrial translation elongation; Mitochondrial translation termination	19.8644	20.3023	-0.4379	0.0008	0.0029	FDR <= 0.01	20.039	20.3023	-0.2633	0.0133	0.0252	FDR <= 0.05
274	Q06124-2	Q06124-2;Q06124-3	Isoform 2 of Tyrosine-protein phosphatase non-receptor type 11 OS=Homo sapiens OX=9606 GN=PTPN11	28	1	206	cell differentiation;cell organization and biogenesis;cellular component movement;metabolic process;regulation of biological process;response to stimulus	cytoplasm;cytosol;mitochondrion;nucleus	catalytic activity;protein binding	PTPN11	IL-5 Signaling Pathway; Heart Development; IL-1 signaling pathway; Leptin signaling pathway; Prolactin Signaling Pathway; B Cell Receptor Signaling Pathway; Interleukin-11 Signaling Pathway; Oncostatin M Signaling Pathway; Brain-Derived Neurotrophic Factor (BDNF) signaling pathway; Alpha 6 Beta 4 signaling pathway; IL-3 Signaling Pathway; Kit receptor signaling pathway; Signaling of Hepatocyte Gr…	Proteoglycans in cancer; Axon guidance; Neurotrophin signaling pathway; Leukocyte transendothelial migration; Insulin resistance; Natural killer cell mediated cytotoxicity; Herpes simplex infection; Adipocytokine signaling pathway; Renal cell carcinoma; Ras signaling pathway; Phospholipase D signaling pathway; Jak-STAT signaling pathway; Epithelial cell signaling in Helicobacter pylori infection;…		24.4164	24.5094	-0.093	0.0063	0.0167	FDR <= 0.05	24.6341	24.5094	0.1247	0.0012	0.0031	FDR <= 0.01
6830	Q96KP1	Q96KP1;Q2MDF5	Exocyst complex component 2 OS=Homo sapiens OX=9606 GN=EXOC2 PE=1 SV=1	28	28	154	cell organization and biogenesis;regulation of biological process;transport	cytosol;membrane	protein binding	EXOC2	RalA downstream regulated genes	Ras signaling pathway	Translocation of GLUT4 to the plasma membrane; Insulin processing; VxPx cargo-targeting to cilium	23.5407	23.5593	-0.0186	0.5247	0.6233	FDR > 0.05	23.6416	23.5593	0.0823	0.0185	0.0335	FDR <= 0.05
4099	O75947	O75947;O75947-2;F5H608	ATP synthase subunit d, mitochondrial OS=Homo sapiens OX=9606 GN=ATP5PD PE=1 SV=3	11	11	108	cell organization and biogenesis;metabolic process;transport	cytosol;membrane;mitochondrion	catalytic activity;transporter activity	ATP5H	Electron Transport Chain; Oxidative phosphorylation	Alzheimer's disease; Huntington's disease; Oxidative phosphorylation; Parkinson's disease; Metabolic pathways	Cristae formation; Formation of ATP by chemiosmotic coupling	24.5951	25.0316	-0.4365	0	0	FDR <= 0.01	24.6649	25.0316	-0.3667	0	0	FDR <= 0.01
8087	P14384	P14384;F8W111;F8VVI6;H0YHN7	Carboxypeptidase M OS=Homo sapiens OX=9606 GN=CPM PE=1 SV=2	13	13	103	metabolic process	cell surface;extracellular;membrane	catalytic activity;metal ion binding	CPM			Post-translational modification: synthesis of GPI-anchored proteins	23.2305	23.6677	-0.4371	0	0	FDR <= 0.01	22.1163	23.6677	-1.5514	0	0	FDR <= 0.01											0.9324	0.3282	0.9811	0.3236	0.9563	0.3254	-1.3191	-1.2729	-1.2551	6
761	Q9Y230	Q9Y230;Q9Y230-2;M0R0Y3;X6R2L4;M0QXI6	RuvB-like 2 OS=Homo sapiens OX=9606 GN=RUVBL2 PE=1 SV=3	23	23	163	cell organization and biogenesis;metabolic process;regulation of biological process;response to stimulus	cytoplasm;cytosol;membrane;nucleus	catalytic activity;DNA binding;nucleotide binding;protein binding	RUVBL2			HATs acetylate histones; Telomere Extension By Telomerase	25.5078	25.5159	-0.0082	0.7393	0.8031	FDR > 0.05	25.3084	25.5159	-0.2075	0	0.0001	FDR <= 0.01
6288	Q86SR1	Q86SR1;Q86SR1-2;Q86SR1-4;Q86SR1-3;F2Z2M7	Polypeptide N-acetylgalactosaminyltransferase 10 OS=Homo sapiens OX=9606 GN=GALNT10 PE=1 SV=2	7	7	27	metabolic process	Golgi;membrane	catalytic activity;metal ion binding	GALNT10		Mucin type O-glycan biosynthesis; Metabolic pathways	O-linked glycosylation of mucins	19.6982	20.1349	-0.4368	0	0	FDR <= 0.01	19.1053	20.1349	-1.0296	0	0	FDR <= 0.01											1.1091	0.0699	1.0937	0.1563	1.0656	0.1216	-1.067	-1.3302	-1.219	6
4754	Q92626	Q92626;H7C1W1;Q92626-2;C9J4I9;H7C300	Peroxidasin homolog OS=Homo sapiens OX=9606 GN=PXDN PE=1 SV=2	20	20	98	cell organization and biogenesis;metabolic process;regulation of biological process;response to stimulus	endoplasmic reticulum;extracellular	antioxidant activity;catalytic activity;metal ion binding;protein binding;structural molecule activity	PXDN	EGF/EGFR Signaling Pathway		Crosslinking of collagen fibrils	22.1574	22.2272	-0.0698	0.03	0.0616	FDR > 0.05	22.0888	22.2272	-0.1384	0.0008	0.0023	FDR <= 0.01																					Core matrisome	ECM Glycoproteins
1858	P08559	P08559-2;P08559;P08559-4;P08559-3;Q5JPU3;P29803;Q5JPT9;Q5JPU1;Q5JPU0;Q5JPU2	Pyruvate dehydrogenase E1 component subunit alpha, somatic form, mitochondrial OS=Homo sapiens OX=9606 GN=PDHA1 PE=1 SV=3	19	19	241	metabolic process;regulation of biological process	mitochondrion;nucleus;organelle lumen	catalytic activity;protein binding	PDHA1	TCA Cycle and Deficiency of Pyruvate Dehydrogenase complex (PDHc); Amino Acid metabolism; Acetylcholine Synthesis; Glycolysis and Gluconeogenesis	Glucagon signaling pathway; Central carbon metabolism in cancer; Metabolic pathways; Pyruvate metabolism; HIF-1 signaling pathway; Glycolysis / Gluconeogenesis; Carbon metabolism; Citrate cycle (TCA cycle)	Regulation of pyruvate dehydrogenase (PDH) complex; Signaling by Retinoic Acid; Glyoxylate metabolism and glycine degradation	24.8202	25.2493	-0.429	0	0	FDR <= 0.01	24.8326	25.2493	-0.4166	0	0	FDR <= 0.01
5147	Q9Y265	Q9Y265;Q9Y265-2;E7ETR0;H7C4G5;J3QLR1;H7C4I3	RuvB-like 1 OS=Homo sapiens OX=9606 GN=RUVBL1 PE=1 SV=1	20	20	176	cell division;cell organization and biogenesis;metabolic process;regulation of biological process;response to stimulus	cytoplasm;cytoskeleton;cytosol;membrane;nucleus	catalytic activity;nucleotide binding;protein binding	RUVBL1	Gastric Cancer Network 1	Wnt signaling pathway	Ub-specific processing proteases; UCH proteinases; DNA Damage Recognition in GG-NER; HATs acetylate histones; Formation of the beta-catenin:TCF transactivating complex; Telomere Extension By Telomerase; Deposition of new CENPA-containing nucleosomes at the centromere	25.217	25.2206	-0.0036	0.9005	0.9265	FDR > 0.05	25.0316	25.2206	-0.189	0.0001	0.0005	FDR <= 0.01
1369	Q9Y2X3	Q9Y2X3;H7BZ72;F8WED0	Nucleolar protein 58 OS=Homo sapiens OX=9606 GN=NOP58 PE=1 SV=1	22	22	152	cell growth;metabolic process	cytosol;membrane;nucleus	protein binding;RNA binding	NOP58		Ribosome biogenesis in eukaryotes	Major pathway of rRNA processing in the nucleolus and cytosol; rRNA modification in the nucleus and cytosol; SUMOylation of RNA binding proteins	23.6636	23.7766	-0.113	0.0533	0.0988	FDR > 0.05	23.4188	23.7766	-0.3578	0.0001	0.0004	FDR <= 0.01
7024	A2IDC6	Q13084;A2IDC6;A2IDC7;Q4TT37	39S ribosomal protein L28, mitochondrial (Fragment) OS=Homo sapiens OX=9606 GN=MRPL28 PE=1 SV=1	5	5	15	cell organization and biogenesis;metabolic process	cytosol;membrane;mitochondrion;ribosome	protein binding;RNA binding;structural molecule activity	MRPL28				21.7641	22.2002	-0.4361	0	0	FDR <= 0.01	21.8997	22.2002	-0.3005	0	0	FDR <= 0.01
2097	Q15334	Q15334;A0A087WW77	Lethal(2) giant larvae protein homolog 1 OS=Homo sapiens OX=9606 GN=LLGL1 PE=1 SV=3	25	25	146	cell organization and biogenesis;regulation of biological process;transport	cytoplasm;cytoskeleton;endosome;Golgi;membrane	enzyme regulator activity;protein binding;structural molecule activity	LLGL1		Tight junction; Hippo signaling pathway		21.9905	21.9425	0.0481	0.1116	0.1807	FDR > 0.05	22.1611	21.9425	0.2187	0	0.0002	FDR <= 0.01
1736	H3BNK2	H3BNK2;O43325	LYR motif-containing protein 1 OS=Homo sapiens OX=9606 GN=LYRM1 PE=1 SV=1	2	2	8								20.125	20.5604	-0.4354	0	0.0001	FDR <= 0.01	20.0859	20.5604	-0.4745	0	0	FDR <= 0.01
2051	Q6UVY6	Q6UVY6;Q6UVY6-2	DBH-like monooxygenase protein 1 OS=Homo sapiens OX=9606 GN=MOXD1 PE=1 SV=1	17	17	226	metabolic process	endoplasmic reticulum;membrane	catalytic activity;metal ion binding;protein binding	MOXD1				25.0982	25.5334	-0.4353	0	0	FDR <= 0.01	24.2487	25.5334	-1.2847	0	0	FDR <= 0.01											1.0569	0.3143	0.9671	0.1727	1.011	0.2439	-1.1737	-1.2801	-1.312	6
[truncated: 7,438 more rows]
